# Supplementary material for: Ser/Thr/Tyr Protein Phosphorylation in the Archaeon Halobacterium salinarum—A Representative of the Third Domain of Life
Source: PubMed Central journal article supplement (PMC2652253; doi:10.1371/journal.pone.0004777), 2009-03-10

**Result Explorer**

Summary | Identifications | Modifications | All Peptides | MS Scans | MS/MS Scans | All Proteins

Protein Groups | Peptides | **Modification-Specific Peptides** | Evidence | MS/MS

| Sequence           | Modifications | Mass      | Mass Error [ppm] | Mass Fractional Part | Protein Groups | Proteins | Unique (Groups) | Unique (Protein) | Oxidatic (M) | phosph | N-Acety (Protein) | Slice Average | Slice Std. Dev. | Slice 1 | Slice 2 | Slice 3 |
|--------------------|---------------|-----------|------------------|----------------------|----------------|----------|-----------------|------------------|--------------|--------|-------------------|---------------|-----------------|---------|---------|---------|
| YDPSLHSSGETLPGGGRK | phospho(STY)  | 1879.8466 | 0.021414         | 0.84655739           | 869            | DE4305R  | yes             | yes              | 0            | 1      | 0                 | 2             | 0               |         | 1       |         |

---

**Raw Viewer - [Dataset1]**

File | Tools | Window | Help

Raw Files

Map | MS | MS/MS | XIC

YDPSLHSSGETLPGGGRK; Scan 7312; 20070813\_BM\_HaSal\_Q2

Slide 1 of 1 | "Office Theme" | English (U.S.) | 104% | DE | 17:16

Result Explorer

Summary | Identifications | Modifications | All Peptides | MS Scans | MS/MS Scans | All Proteins

Protein Groups | Peptides | Modification-Specific Peptides | Evidence | MS/MS

|   | Sequence         | Modifications | Mass      | Mass Error [ppm] | Mass Fractional Part | Protein Groups | Proteins | Unique (Groups) | Unique (Protein) | Oxidatic (M) | phosph | N-Acety (Protein) | Slice Average | Slice Std. Dev. | Slice 1 | Slice 2 | Slice 3 |
|---|------------------|---------------|-----------|------------------|----------------------|----------------|----------|-----------------|------------------|--------------|--------|-------------------|---------------|-----------------|---------|---------|---------|
| ▶ | YDPSLHSSGETLPGGR | phospho(STY)  | 1751.7516 | -0.78412         | 0.75159437           | 869            | DE4305R  | yes             | yes              | 0            | 1      | 0                 | 5             | 0               |         |         |         |

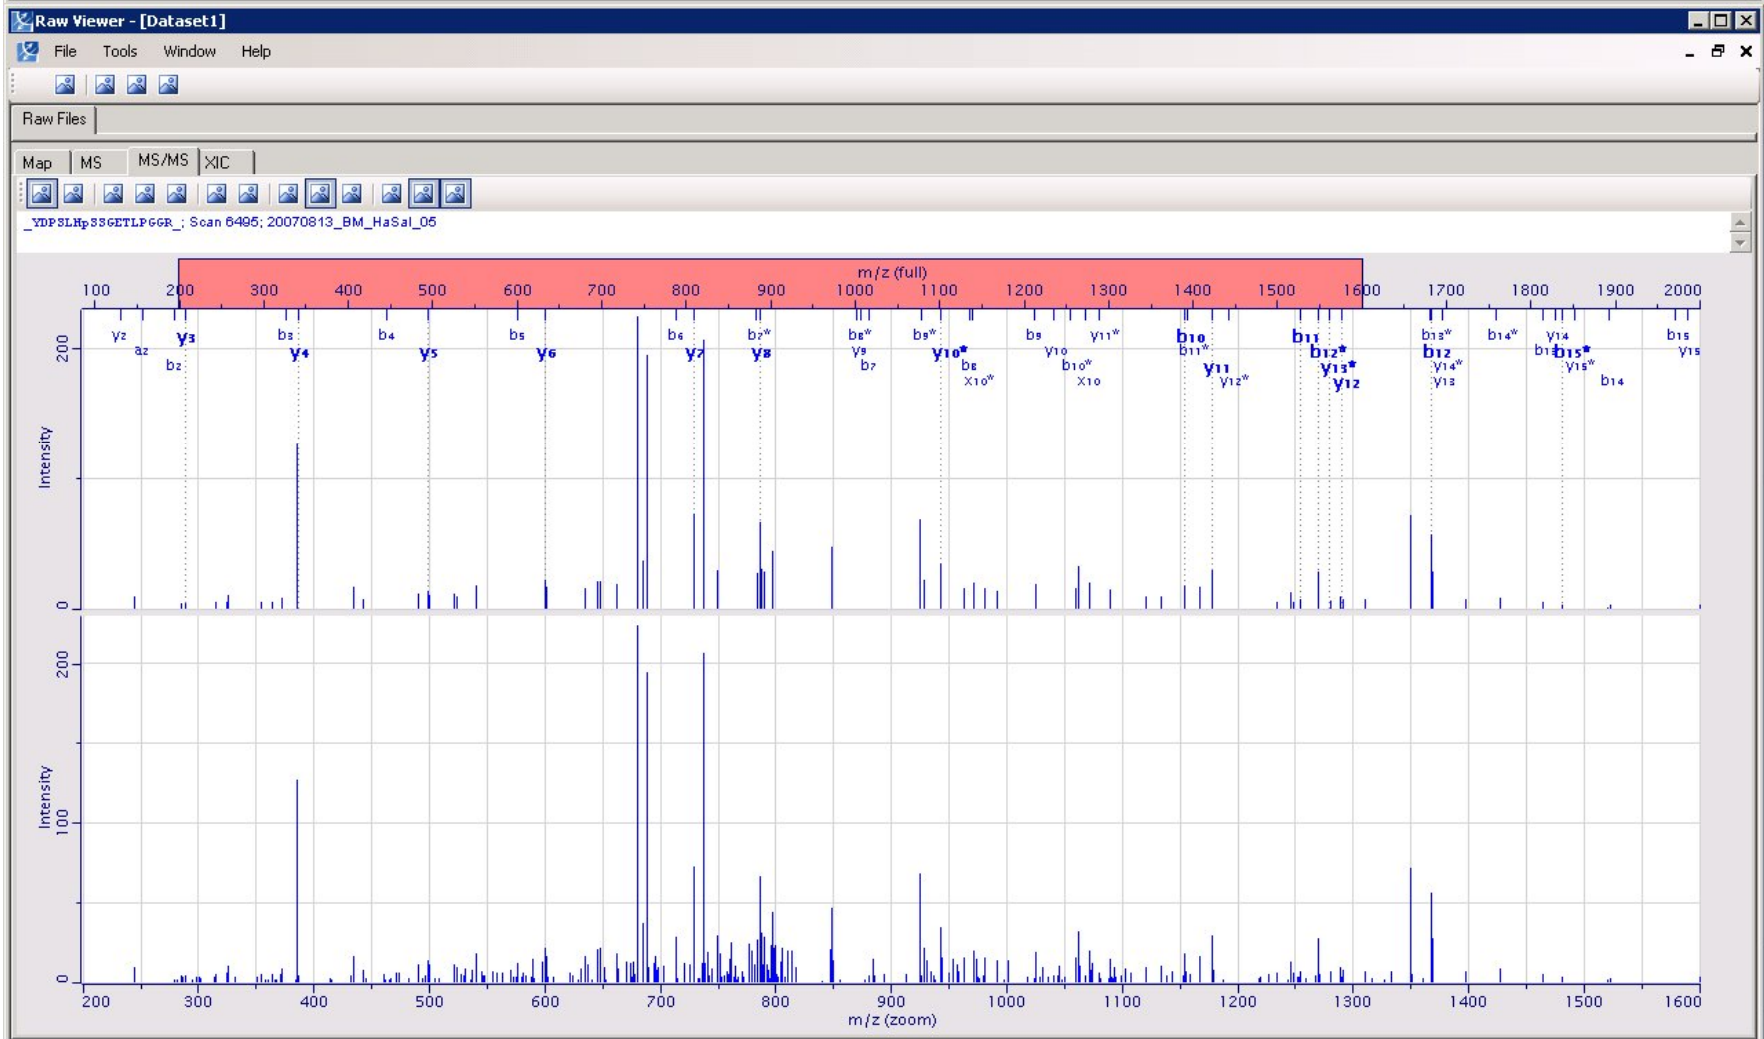

Result Explorer

Summary | Identifications | Modifications | All Peptides | MS Scans | MS/MS Scans | All Proteins

Protein Groups | Peptides | Modification-Specific Peptides | Evidence | MS/MS

|     | Sequence     | Modifications | Mass      | Mass Error [ppm] | Mass Fractional Part | Protein Groups | Proteins | Unique (Groups) | Unique (Protein) | Oxidatic (M) | phosph | N-Acety (Protein) | Slice Average | Slice Std. Dev. | Slice 1 | Slice 2 | Slice 3 |
|-----|--------------|---------------|-----------|------------------|----------------------|----------------|----------|-----------------|------------------|--------------|--------|-------------------|---------------|-----------------|---------|---------|---------|
| ▶ 3 | VSSADSASVRQK | phospho(STY)  | 1313.5977 | 0.15923          | 0.59765991           | 940            | DE4551F  | yes             | yes              | 0            | 1      | 0                 | 5             | 0               |         |         |         |

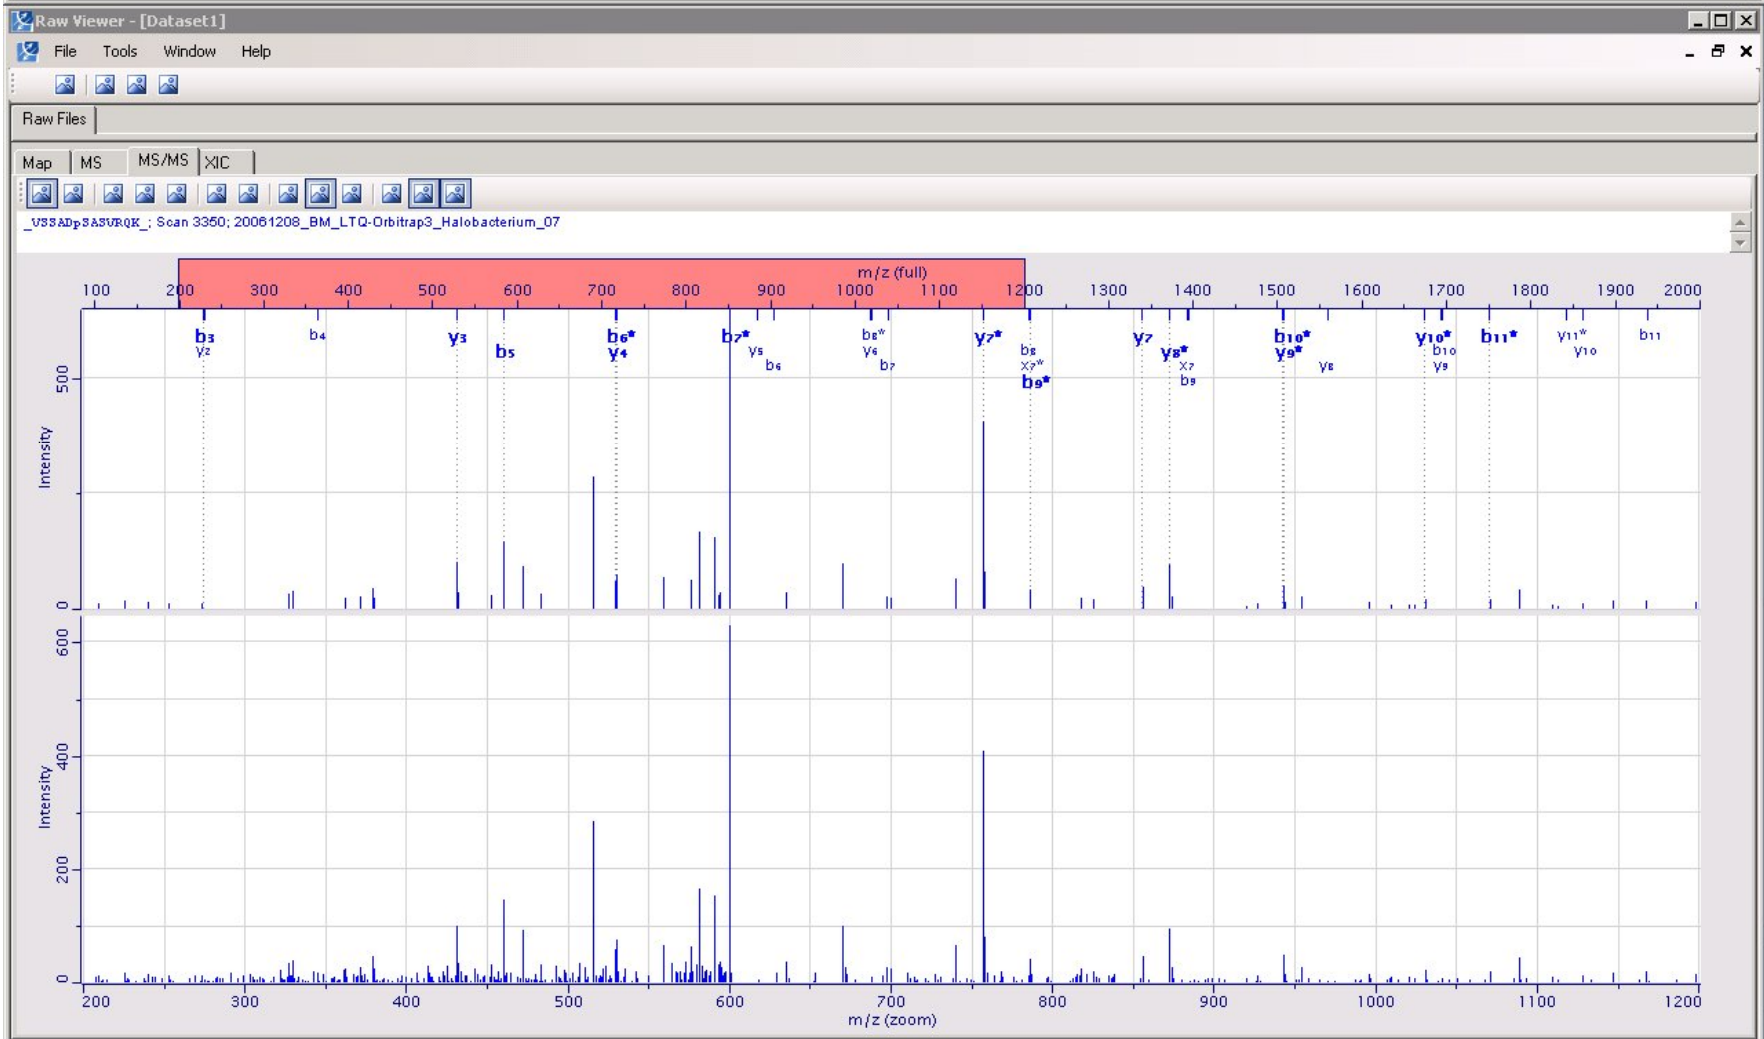

Result Explorer

Summary | Identifications | Modifications | All Peptides | MS Scans | MS/MS Scans | All Proteins

Protein Groups | Peptides | Modification-Specific Peptides | Evidence | MS/MS

|     | Sequence      | Modifications | Mass      | Mass Error [ppm] | Mass Fractional Part | Protein Groups | Proteins | Unique (Groups) | Unique (Protein) | Oxidatic (M) | phosph | N-Acety (Protein) | Slice Average | Slice Std. Dev. | Slice 1 | Slice 2 | Slice 3 |
|-----|---------------|---------------|-----------|------------------|----------------------|----------------|----------|-----------------|------------------|--------------|--------|-------------------|---------------|-----------------|---------|---------|---------|
| ▶ 4 | VSRGSTIAEELER | phospho(STY)  | 1525.7138 | -0.39457         | 0.7137523            | 976            | OE4671R  | yes             | yes              | 0            | 1      | 0                 | 4             | 0               |         |         |         |

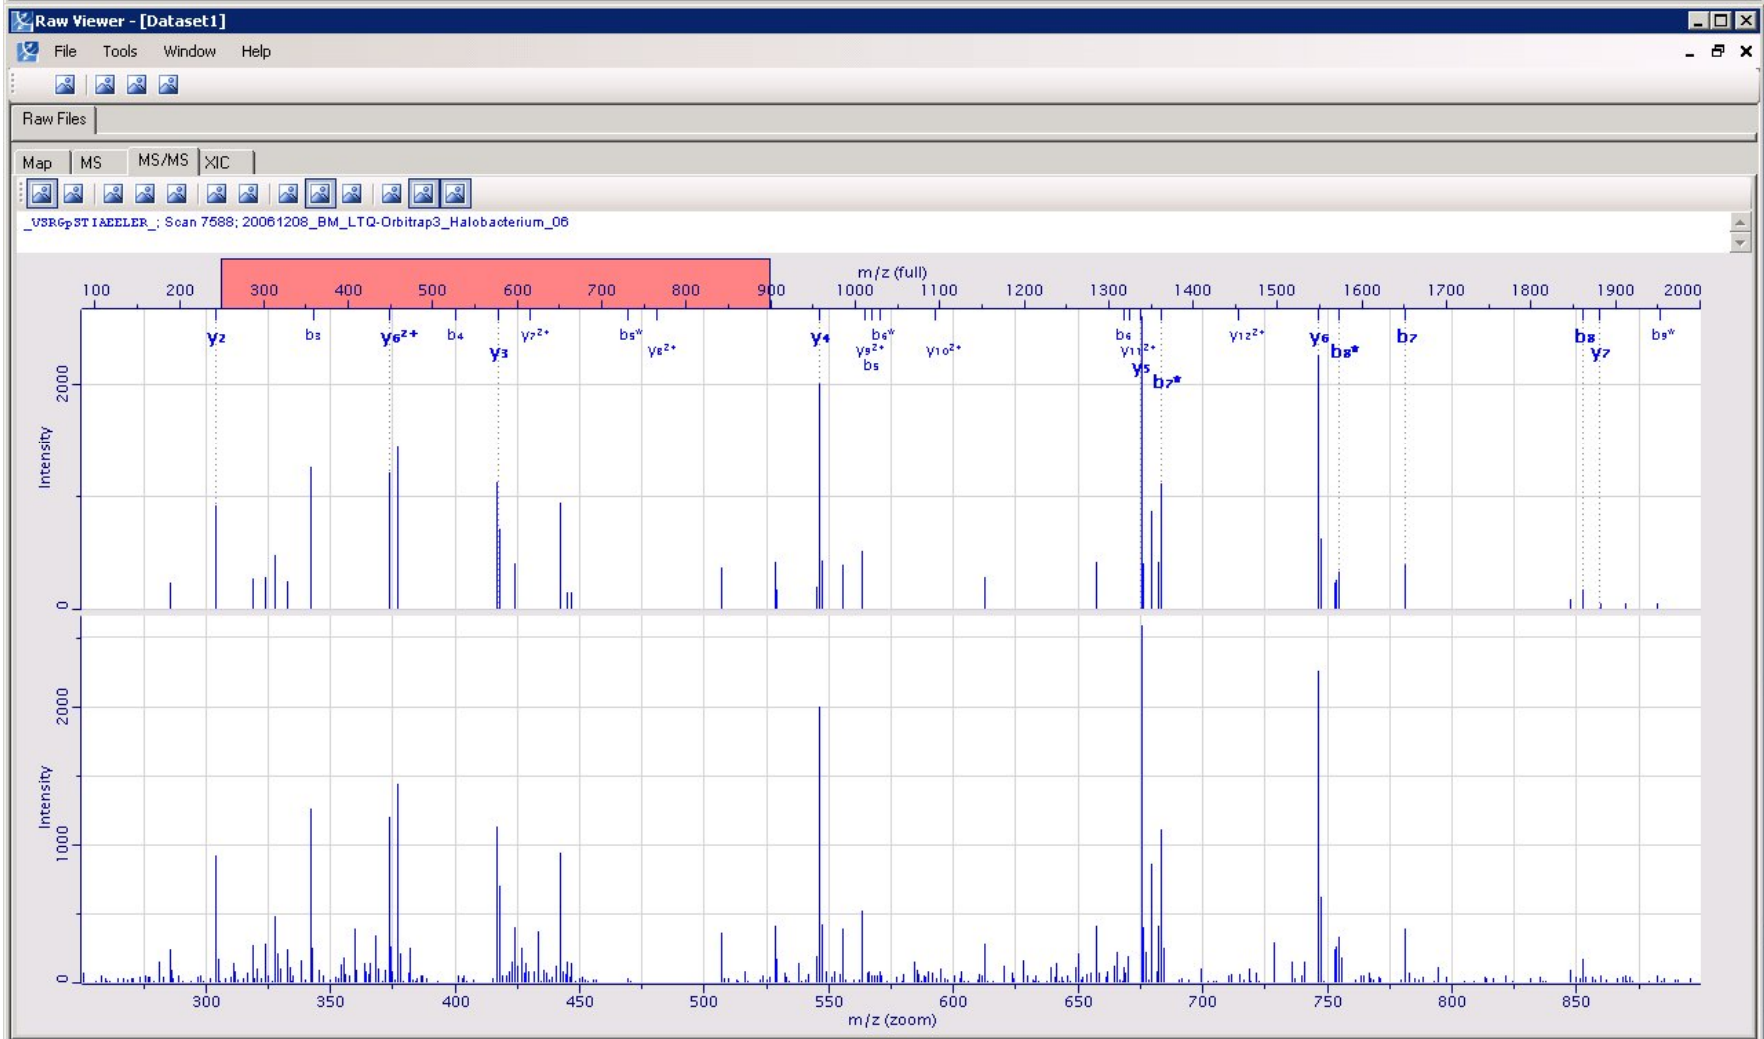

Result Explorer

Summary | Identifications | Modifications | All Peptides | MS Scans | MS/MS Scans | All Proteins

Protein Groups | Peptides | Modification-Specific Peptides | Evidence | MS/MS

|     | Sequence             | Modifications | Mass     | Mass Error [ppm] | Mass Fractional Part | Protein Groups | Proteins | Unique (Groups) | Unique (Protein) | Oxidative (M) | phosph | N-Acetyl (Protein) | Slice Average | Slice Std. Dev. | Slice 1 | Slice 2 | Slice 3 |
|-----|----------------------|---------------|----------|------------------|----------------------|----------------|----------|-----------------|------------------|---------------|--------|--------------------|---------------|-----------------|---------|---------|---------|
| ▶ 5 | VRDGEDVAHVSGGDPNVYVK | phospho(STY)  | 2149.943 | -0.26158         | 0.94237637           | 568            | OE3214F  | yes             | yes              | 0             | 1      | 0                  | 2             | 0               |         | 1       |         |

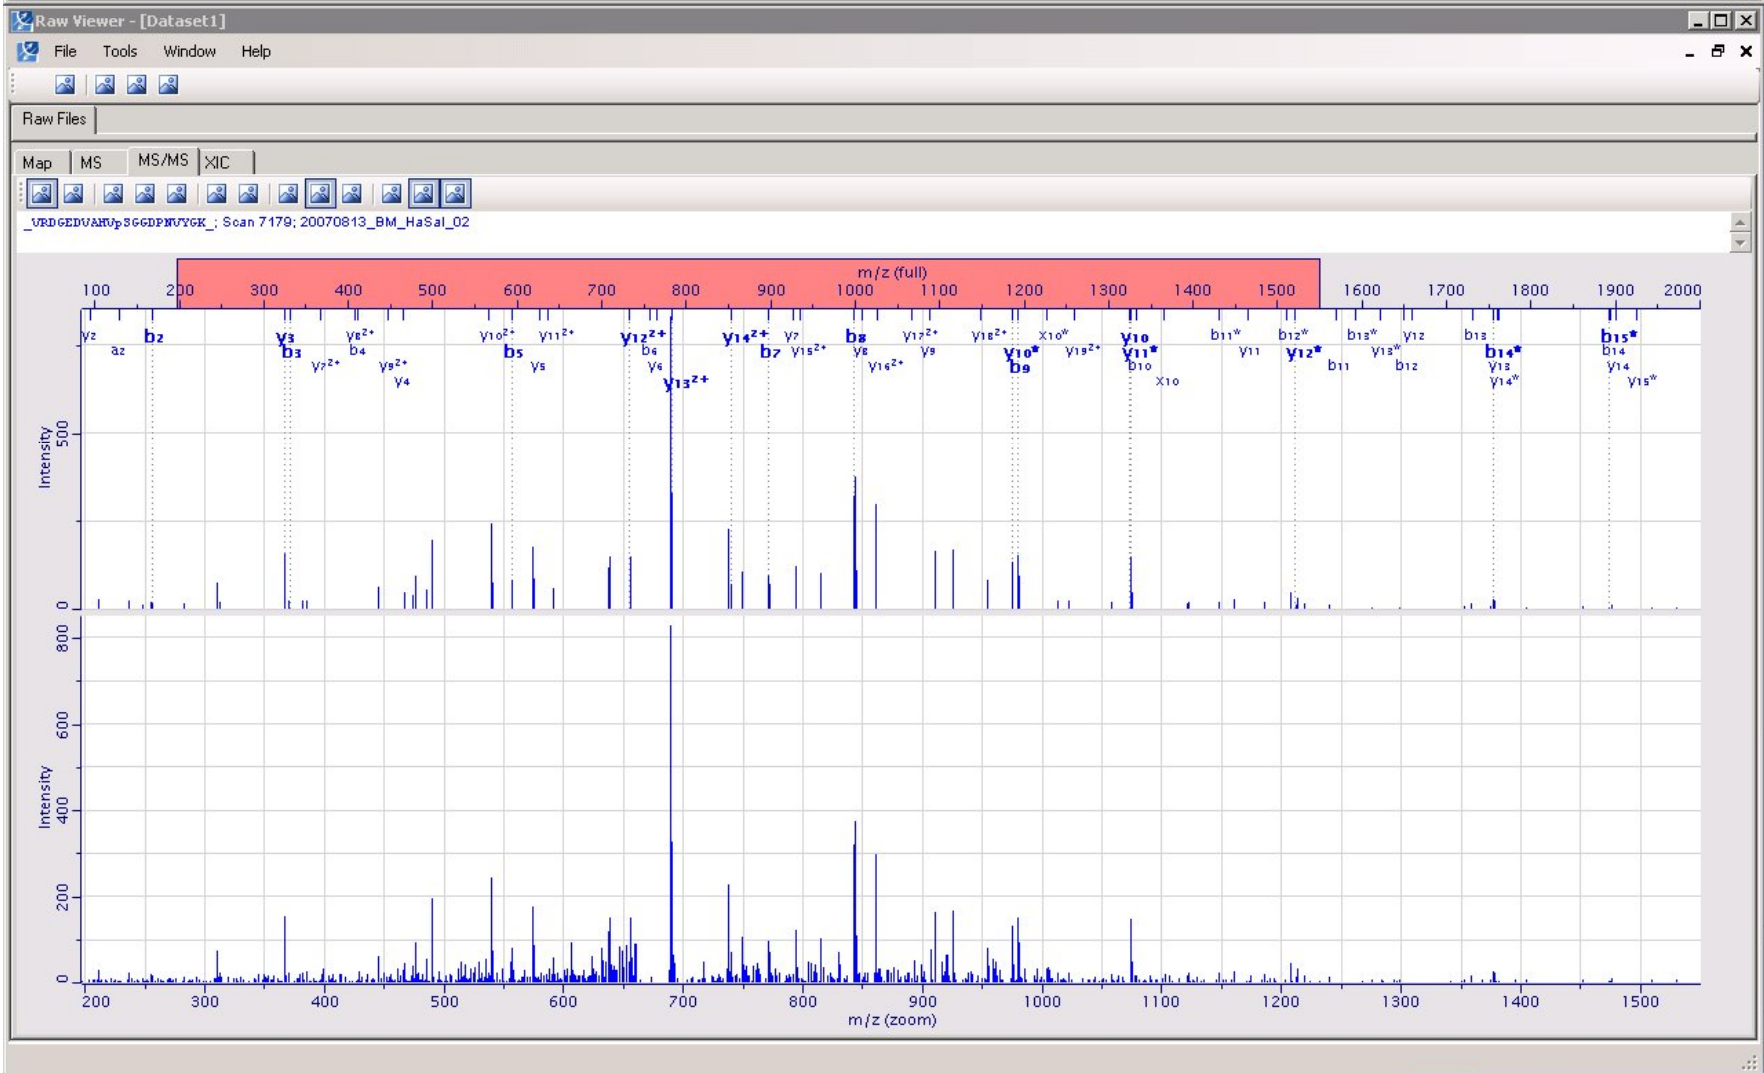

Result Explorer

Summary | Identifications | Modifications | All Peptides | MS Scans | MS/MS Scans | All Proteins

Protein Groups | Peptides | Modification-Specific Peptides | Evidence | MS/MS

|     | Sequence              | Modifications | Mass      | Mass Error [ppm] | Mass Fractional Part | Protein Groups | Proteins | Unique (Groups) | Unique (Protein) | Oxidatic (M) | phosph | N-Acety (Protein) | Slice Average | Slice Std. Dev. | Slice 1 | Slice 2 | Slice 3 |
|-----|-----------------------|---------------|-----------|------------------|----------------------|----------------|----------|-----------------|------------------|--------------|--------|-------------------|---------------|-----------------|---------|---------|---------|
| ▶ 6 | VPSDLIADLPSEKTSSEAHPK | phospho(STY)  | 2116.0089 | 0.015303         | 0.0089312...         | 977            | DE4673F  | yes             | yes              | 0            | 1      | 0                 | 3             | 0               |         |         | 1       |

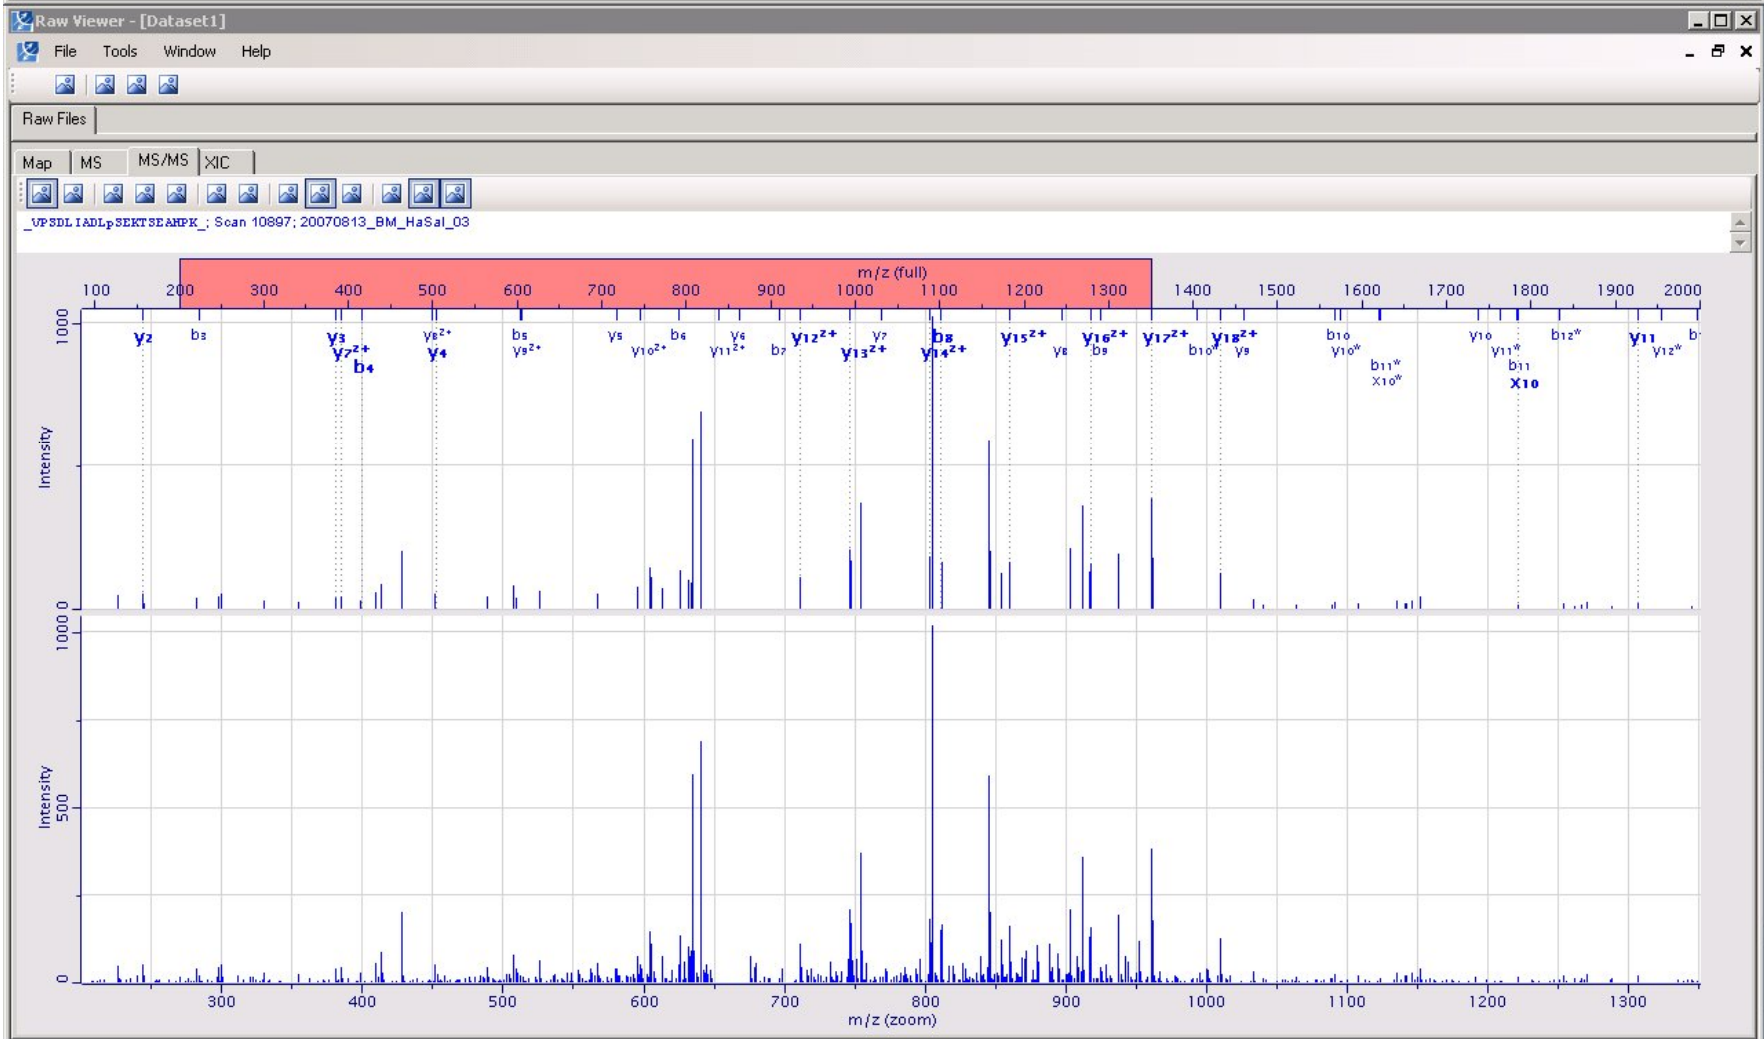

**Result Explorer**

Summary | Identifications | Modifications | All Peptides | MS Scans | MS/MS Scans | All Proteins

Protein Groups | Peptides | **Modification-Specific Peptides** | Evidence | MS/MS

|   | Sequence           | Modifications | Mass     | Mass Error [ppm] | Mass Fractional Part | Protein Groups | Proteins | Unique (Groups) | Unique (Protein) | Oxidatic (M) | phosph | N-Acety (Protein) | Slice Average | Slice Std. Dev. | Slice 1 | Slice 2 | Slice 3 |
|---|--------------------|---------------|----------|------------------|----------------------|----------------|----------|-----------------|------------------|--------------|--------|-------------------|---------------|-----------------|---------|---------|---------|
| ▶ | VLEETLIEPSSQGAITDR | phospho(STY)  | 2267.057 | -0.050803        | 0.0570036...         | 385            | OE2577R  | yes             | yes              | 0            | 1      | 0                 | 9             | 0               |         |         |         |

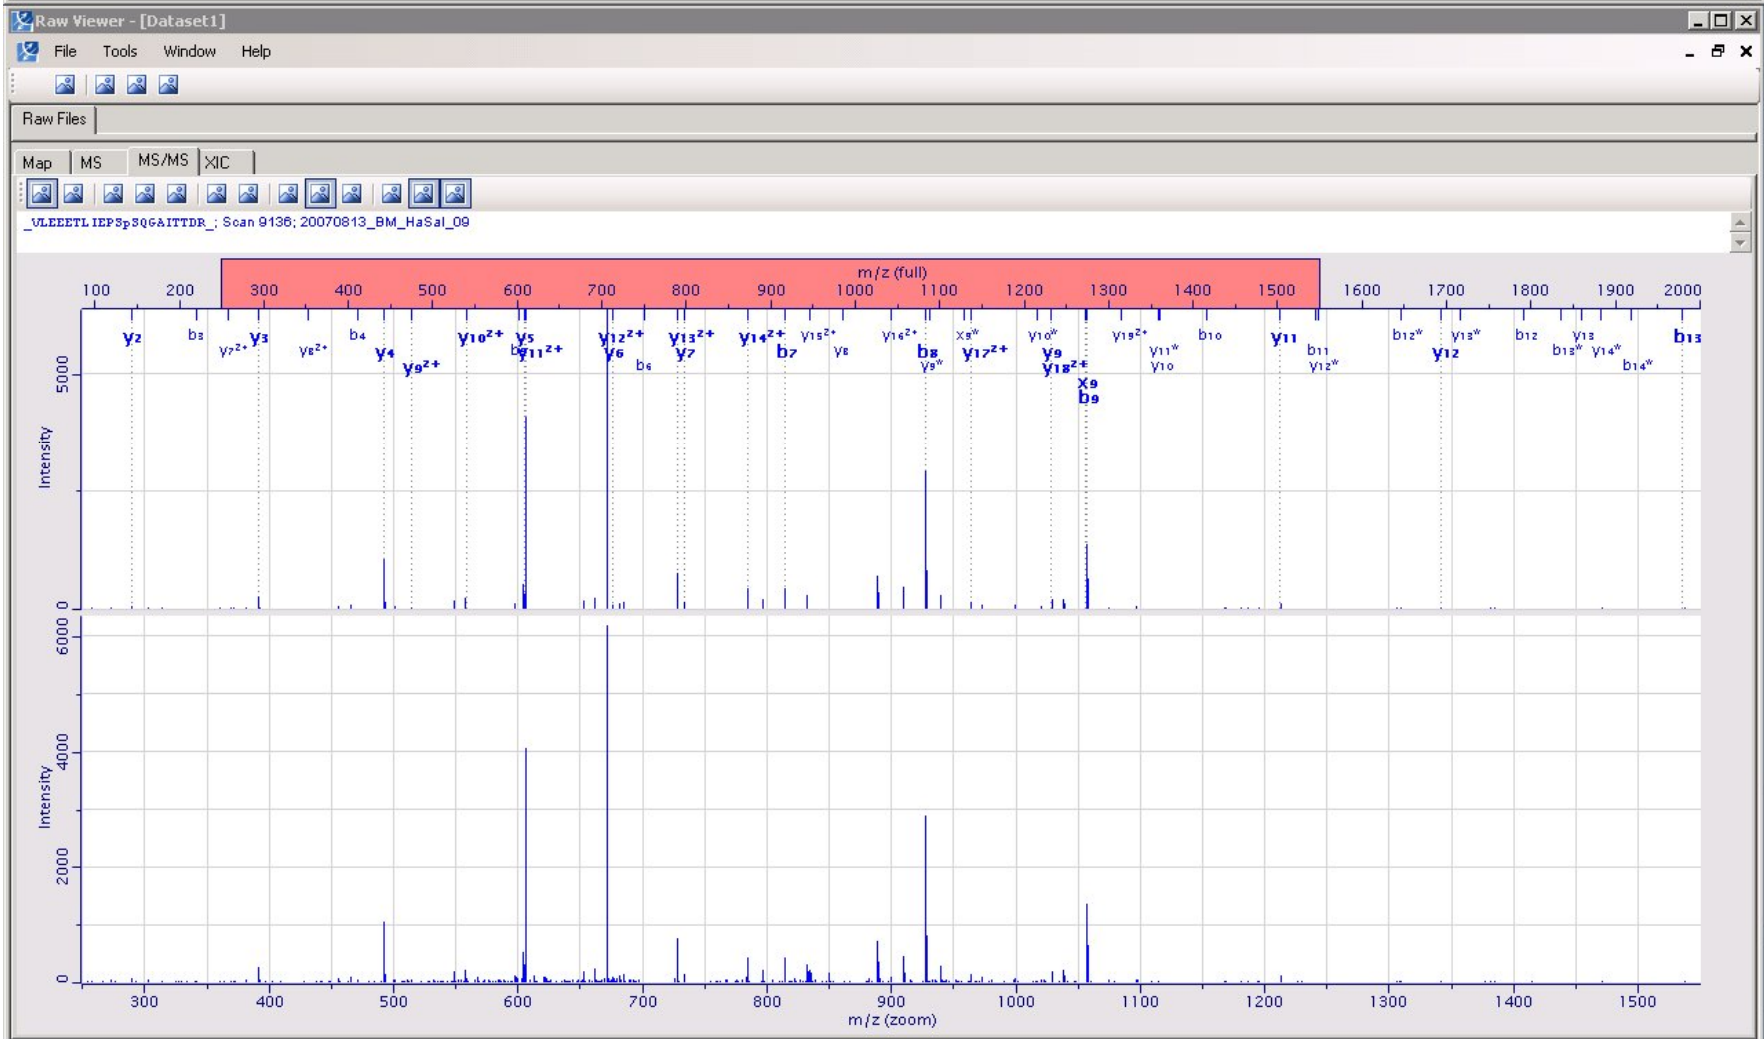

| Result Explorer                                                                                  |          |               |           |                  |                      |                |          |                 |                  |               |        |                   |               |                 |         |         |         |
|--------------------------------------------------------------------------------------------------|----------|---------------|-----------|------------------|----------------------|----------------|----------|-----------------|------------------|---------------|--------|-------------------|---------------|-----------------|---------|---------|---------|
| Summary   Identifications   Modifications   All Peptides   MS Scans   MS/MS Scans   All Proteins |          |               |           |                  |                      |                |          |                 |                  |               |        |                   |               |                 |         |         |         |
| Protein Groups   Peptides   Modification-Specific Peptides   Evidence   MS/MS                    |          |               |           |                  |                      |                |          |                 |                  |               |        |                   |               |                 |         |         |         |
|                                                                                                  | Sequence | Modifications | Mass      | Mass Error [ppm] | Mass Fractional Part | Protein Groups | Proteins | Unique (Groups) | Unique (Protein) | Oxidative (M) | phosph | N-Acety (Protein) | Slice Average | Slice Std. Dev. | Slice 1 | Slice 2 | Slice 3 |
| ▶ 8                                                                                              | VELHLQSR | phospho(STY)  | 1161.5543 | 0.12658          | 0.55433854           | 289            | DE2249R  | yes             | yes              | 0             | 1      | 0                 | 4             | 0               |         |         |         |

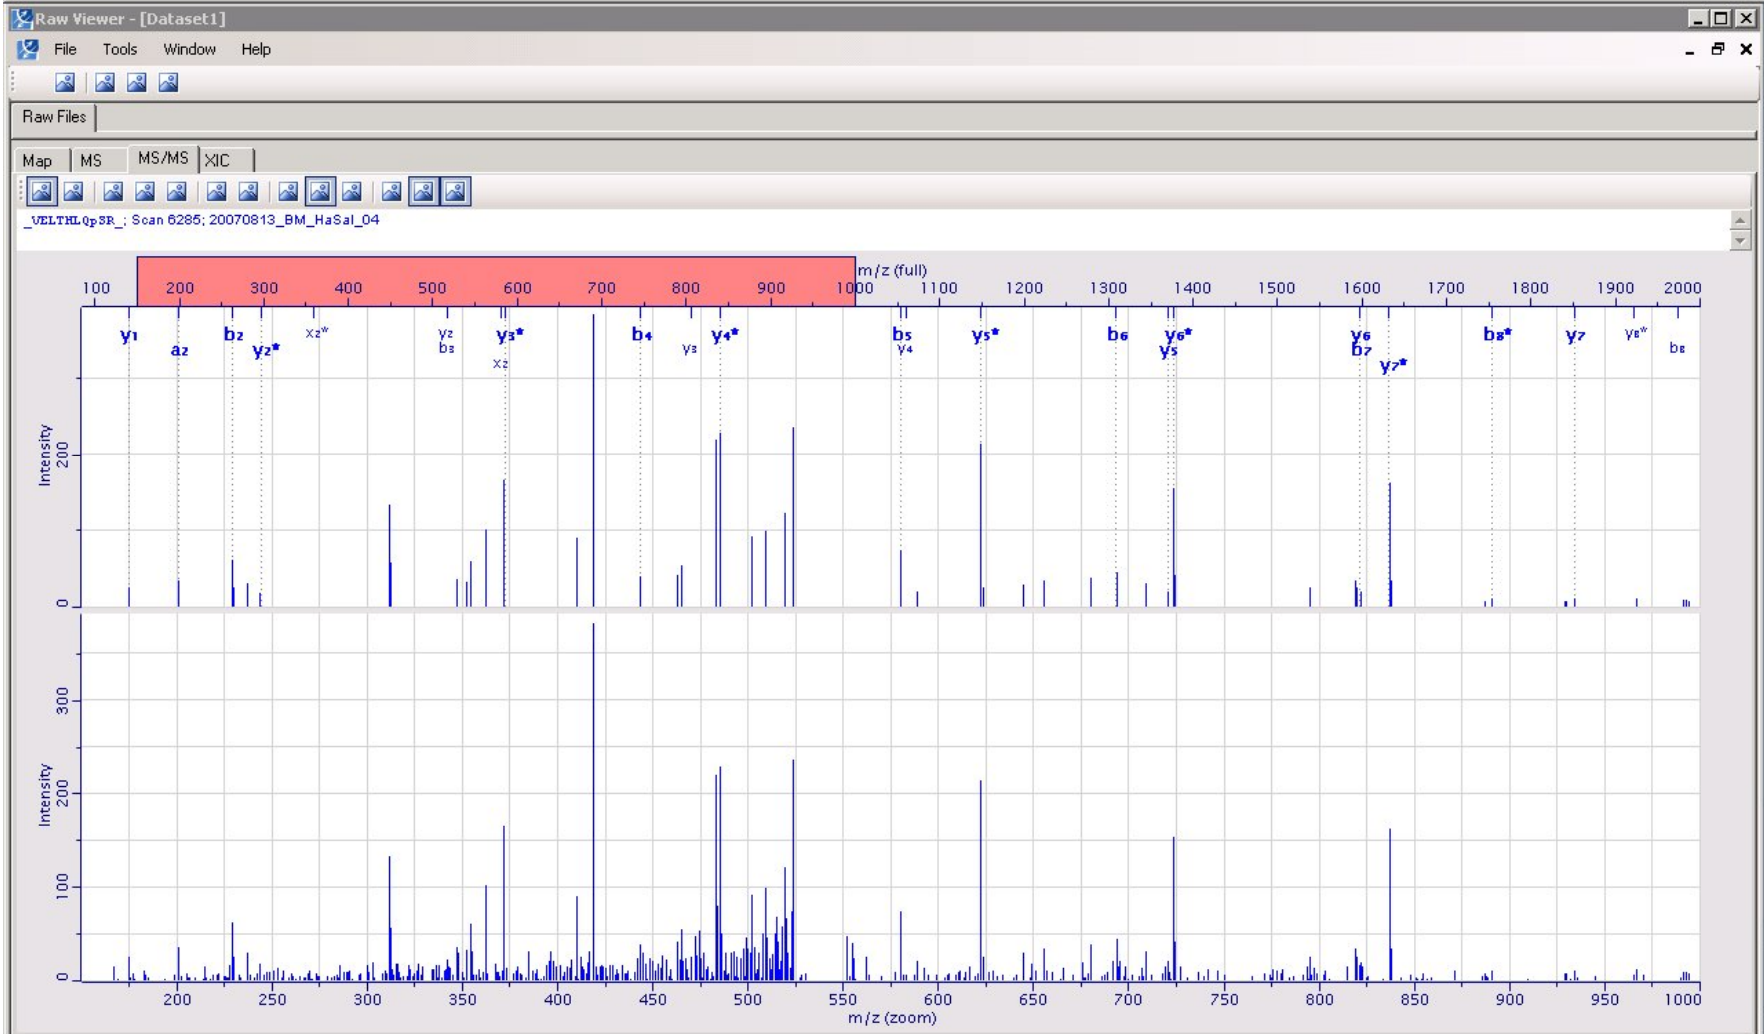



| Result Explorer                                                                                  |            |               |           |                  |                      |                |          |                 |                  |               |        |                   |               |                 |         |         |         |
|--------------------------------------------------------------------------------------------------|------------|---------------|-----------|------------------|----------------------|----------------|----------|-----------------|------------------|---------------|--------|-------------------|---------------|-----------------|---------|---------|---------|
| Summary   Identifications   Modifications   All Peptides   MS Scans   MS/MS Scans   All Proteins |            |               |           |                  |                      |                |          |                 |                  |               |        |                   |               |                 |         |         |         |
| Protein Groups   Peptides   Modification-Specific Peptides   Evidence   MS/MS                    |            |               |           |                  |                      |                |          |                 |                  |               |        |                   |               |                 |         |         |         |
|                                                                                                  | Sequence   | Modifications | Mass      | Mass Error [ppm] | Mass Fractional Part | Protein Groups | Proteins | Unique (Groups) | Unique (Protein) | Oxidative (M) | phosph | N-Acety (Protein) | Slice Average | Slice Std. Dev. | Slice 1 | Slice 2 | Slice 3 |
| ▶ 9                                                                                              | VDVTPNSEHR | phospho(STY)  | 1232.5187 | 0.45909          | 0.51868131           | 831            | DE4169F  | yes             | yes              | 0             | 1      | 0                 | 4             | 0               |         |         |         |

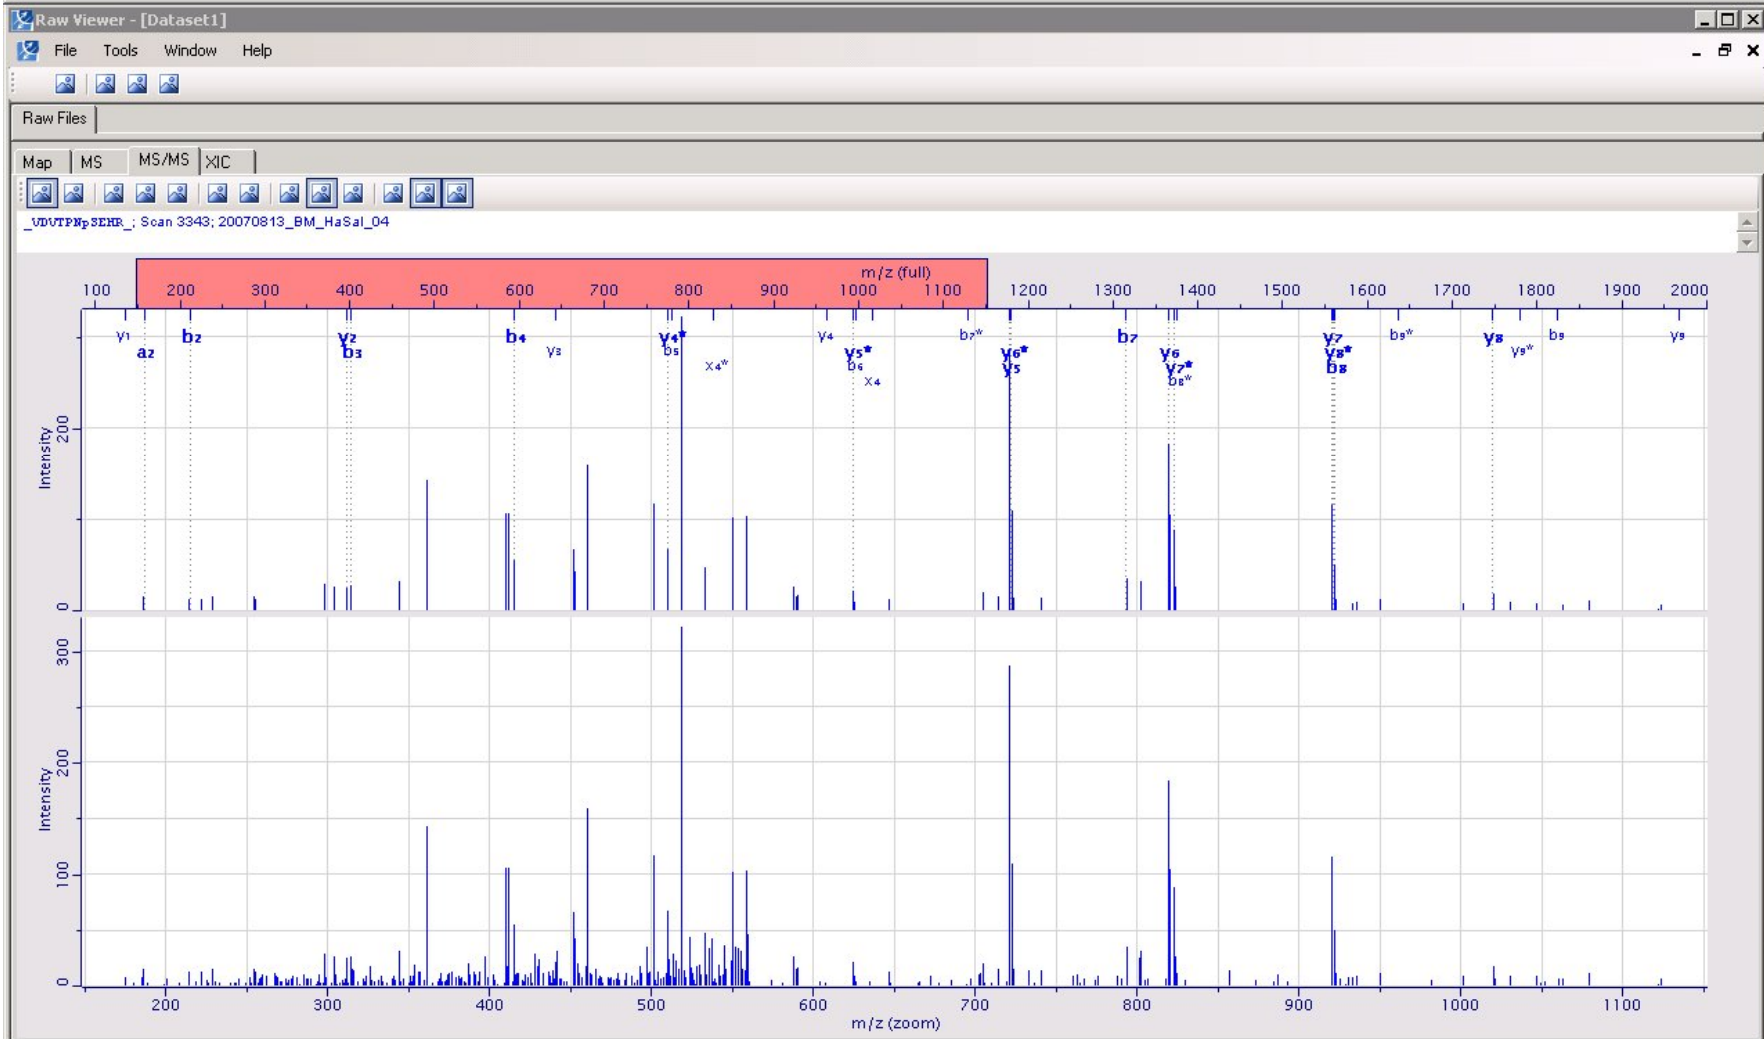

| Result Explorer                                                                                  |                              |               |           |                  |                      |                |          |                 |                  |              |        |                   |               |                 |         |         |         |
|--------------------------------------------------------------------------------------------------|------------------------------|---------------|-----------|------------------|----------------------|----------------|----------|-----------------|------------------|--------------|--------|-------------------|---------------|-----------------|---------|---------|---------|
| Summary   Identifications   Modifications   All Peptides   MS Scans   MS/MS Scans   All Proteins |                              |               |           |                  |                      |                |          |                 |                  |              |        |                   |               |                 |         |         |         |
| Protein Groups   Peptides   Modification-Specific Peptides   Evidence   MS/MS                    |                              |               |           |                  |                      |                |          |                 |                  |              |        |                   |               |                 |         |         |         |
|                                                                                                  | Sequence                     | Modifications | Mass      | Mass Error [ppm] | Mass Fractional Part | Protein Groups | Proteins | Unique (Groups) | Unique (Protein) | Oxidatic (M) | phosph | N-Acety (Protein) | Slice Average | Slice Std. Dev. | Slice 1 | Slice 2 | Slice 3 |
| ▶ 10                                                                                             | TWVALDDTDSRTAGMCTTYAAHLVA... | phospho(STY)  | 3245.4734 | 0.518            | 0.47340576           | 770            | DE3943R  | yes             | yes              | 0            | 1      | 0                 | 4             | 0               |         |         |         |

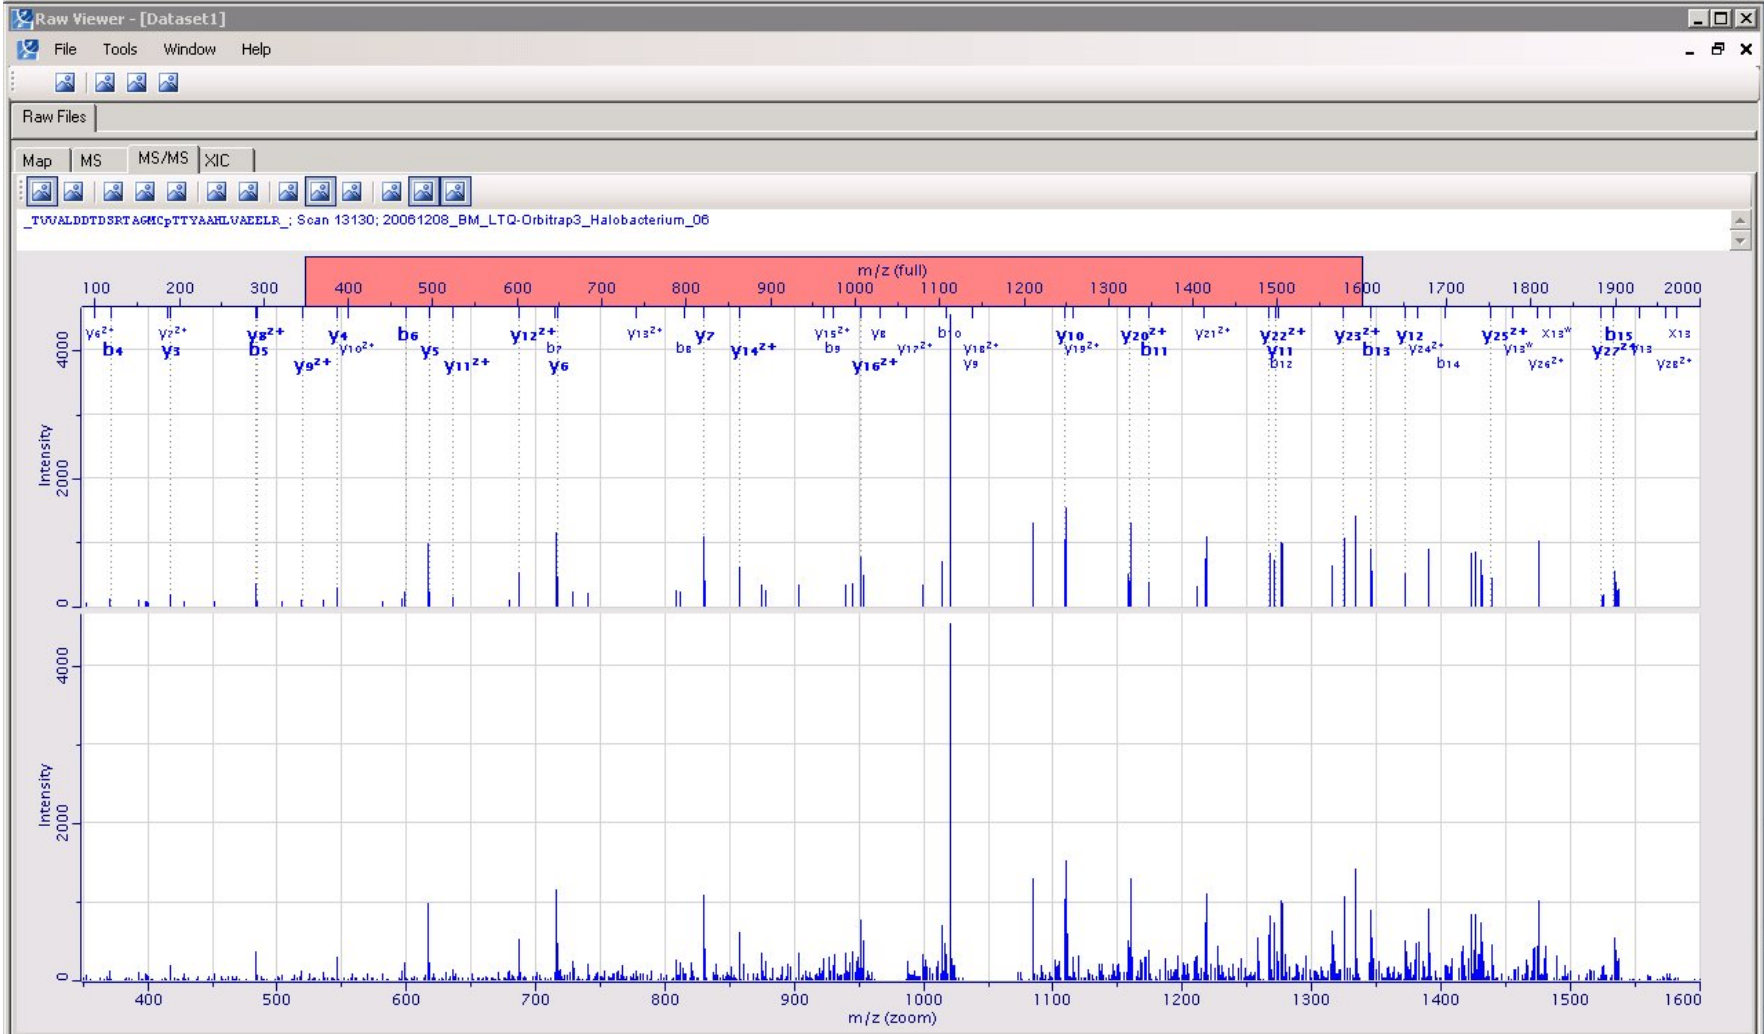

| Result Explorer                                                                                  |                    |               |           |                  |                      |                |          |                 |                  |              |        |                   |               |                 |         |         |         |
|--------------------------------------------------------------------------------------------------|--------------------|---------------|-----------|------------------|----------------------|----------------|----------|-----------------|------------------|--------------|--------|-------------------|---------------|-----------------|---------|---------|---------|
| Summary   Identifications   Modifications   All Peptides   MS Scans   MS/MS Scans   All Proteins |                    |               |           |                  |                      |                |          |                 |                  |              |        |                   |               |                 |         |         |         |
| Protein Groups   Peptides   Modification-Specific Peptides   Evidence   MS/MS                    |                    |               |           |                  |                      |                |          |                 |                  |              |        |                   |               |                 |         |         |         |
|                                                                                                  | Sequence           | Modifications | Mass      | Mass Error [ppm] | Mass Fractional Part | Protein Groups | Proteins | Unique (Groups) | Unique (Protein) | Oxidatic (M) | phosph | N-Acety (Protein) | Slice Average | Slice Std. Dev. | Slice 1 | Slice 2 | Slice 3 |
| ▶ 11                                                                                             | TAGMCTTYAAHLVAEELR | phospho(STY)  | 2072.9061 | -0.1295          | 0.90607468           | 770            | DE3943R  | yes             | yes              | 0            | 1      | 0                 | 4.5           | 1.5             |         |         | 1       |

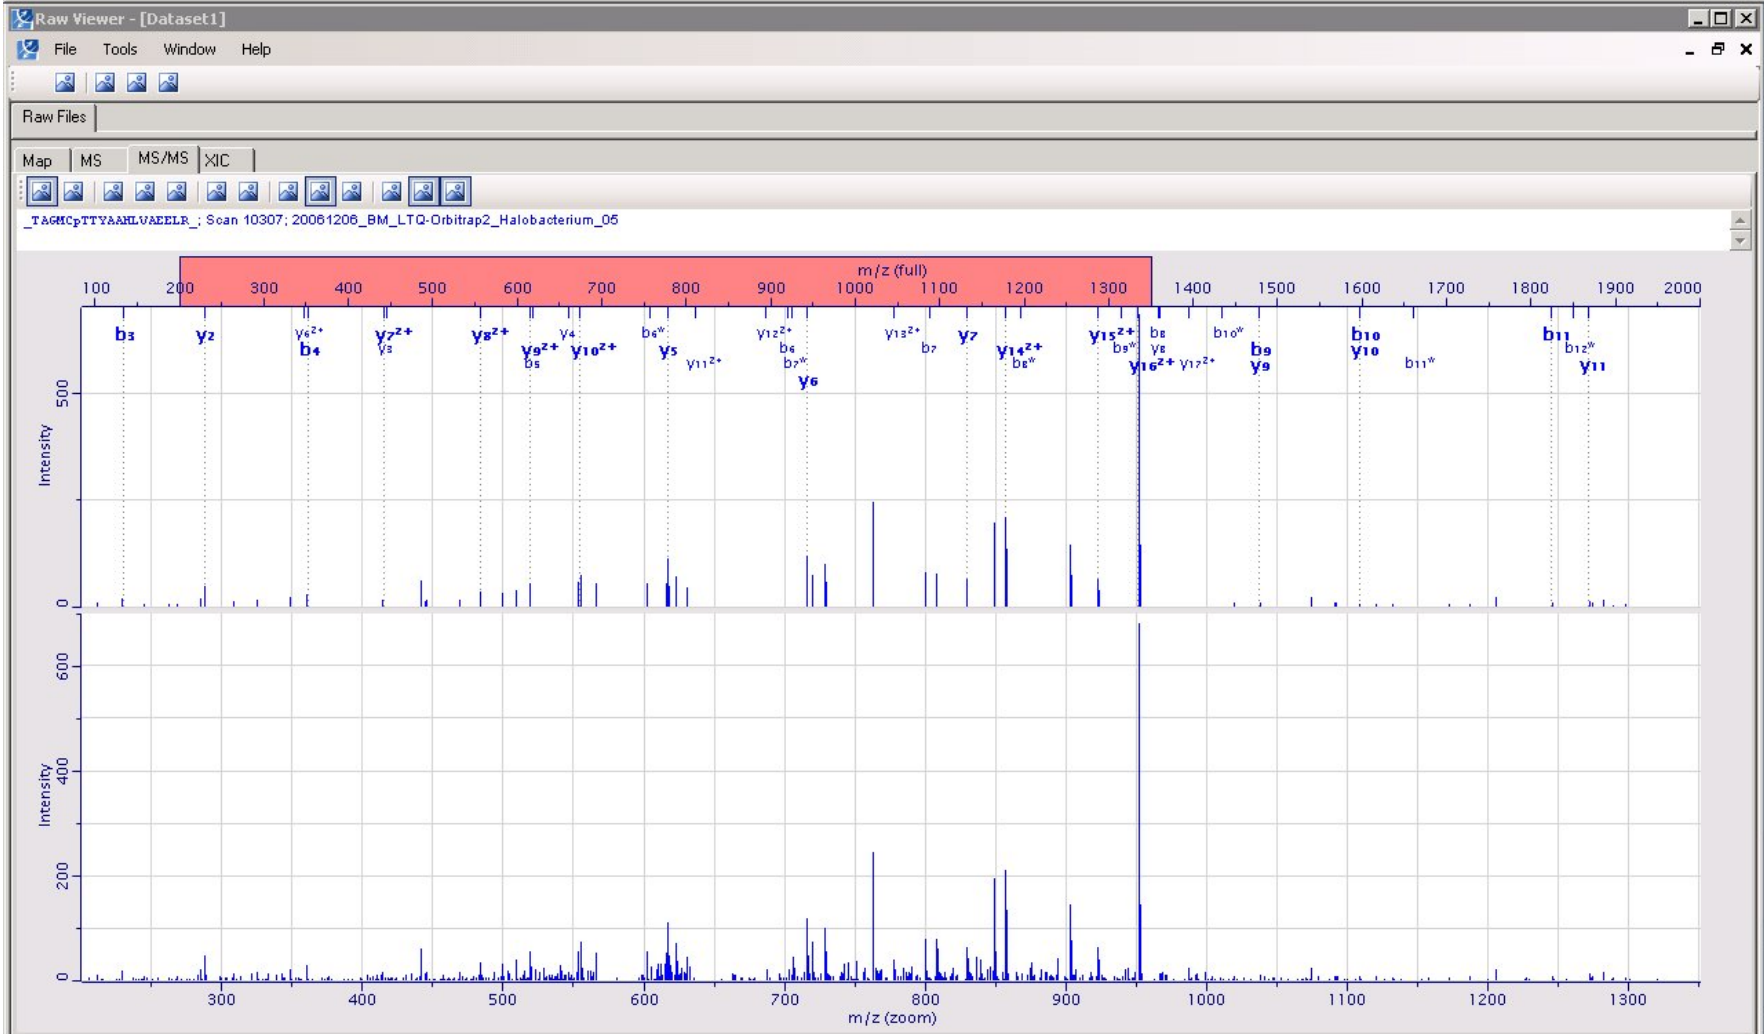

**Result Explorer**

Summary | Identifications | Modifications | All Peptides | MS Scans | MS/MS Scans | All Proteins

Protein Groups | Peptides | **Modification-Specific Peptides** | Evidence | MS/MS

|      | Sequence           | Modifications            | Mass     | Mass Error [ppm] | Mass Fractional Part | Protein Groups | Proteins | Unique (Groups) | Unique (Protein) | Oxidatic (M) | phosph | N-Acety (Protein) | Slice Average | Slice Std. Dev. | Slice 1 | Slice 2 | Slice 3 |
|------|--------------------|--------------------------|----------|------------------|----------------------|----------------|----------|-----------------|------------------|--------------|--------|-------------------|---------------|-----------------|---------|---------|---------|
| ▶ 12 | TAGMCTTYAAHLVAEELR | Oxidation (M), phosph... | 2088.901 | -0.41744         | 0.90100007           | 770            | DE3943R  | yes             | yes              | 1            | 1      | 0                 | 3.5           | 1.5             | 1       | 2       |         |

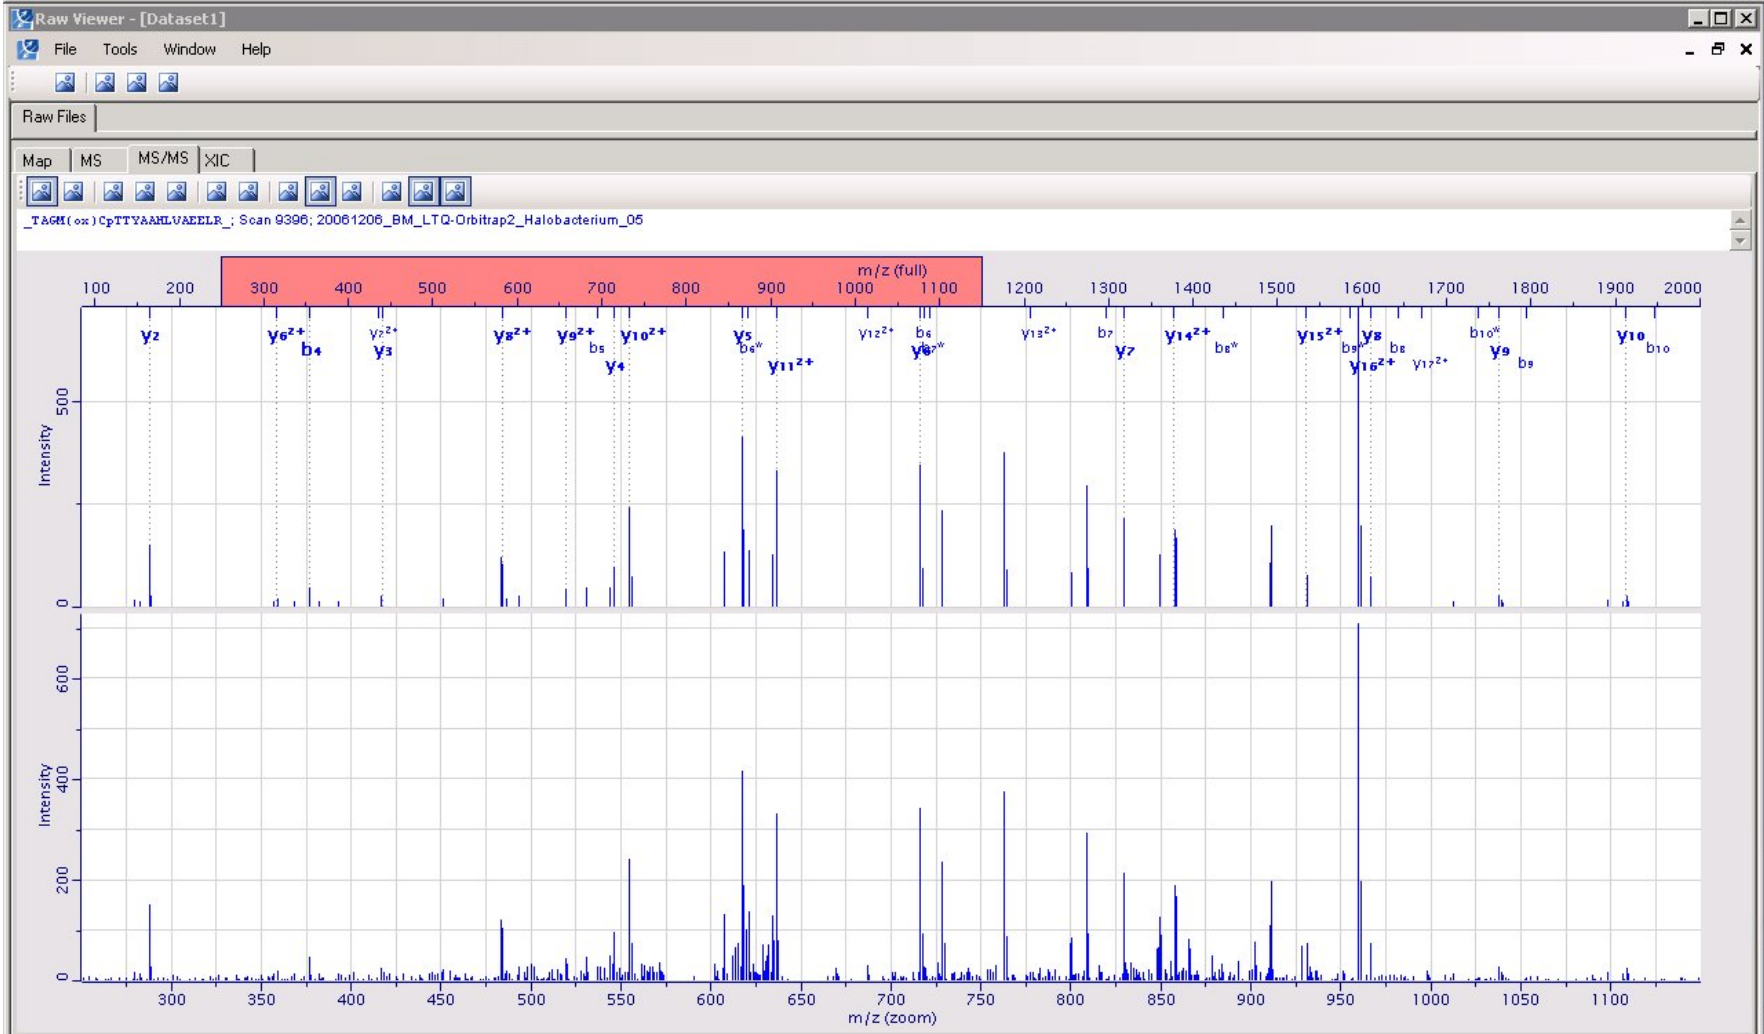

| Result Explorer                                                                                  |               |               |           |                  |                      |                |          |                 |                  |               |        |                   |               |                 |         |         |         |
|--------------------------------------------------------------------------------------------------|---------------|---------------|-----------|------------------|----------------------|----------------|----------|-----------------|------------------|---------------|--------|-------------------|---------------|-----------------|---------|---------|---------|
| Summary   Identifications   Modifications   All Peptides   MS Scans   MS/MS Scans   All Proteins |               |               |           |                  |                      |                |          |                 |                  |               |        |                   |               |                 |         |         |         |
| Protein Groups   Peptides   Modification-Specific Peptides   Evidence   MS/MS                    |               |               |           |                  |                      |                |          |                 |                  |               |        |                   |               |                 |         |         |         |
|                                                                                                  | Sequence      | Modifications | Mass      | Mass Error [ppm] | Mass Fractional Part | Protein Groups | Proteins | Unique (Groups) | Unique (Protein) | Oxidative (M) | phosph | N-Acety (Protein) | Slice Average | Slice Std. Dev. | Slice 1 | Slice 2 | Slice 3 |
| ▶ 13                                                                                             | SYDKIEVPEGGAK | phospho(STY)  | 1471.6596 | -0.049497        | 0.65959147           | 686            | DE3634F  | yes             | yes              | 0             | 1      | 0                 | 6             | 0               |         |         |         |

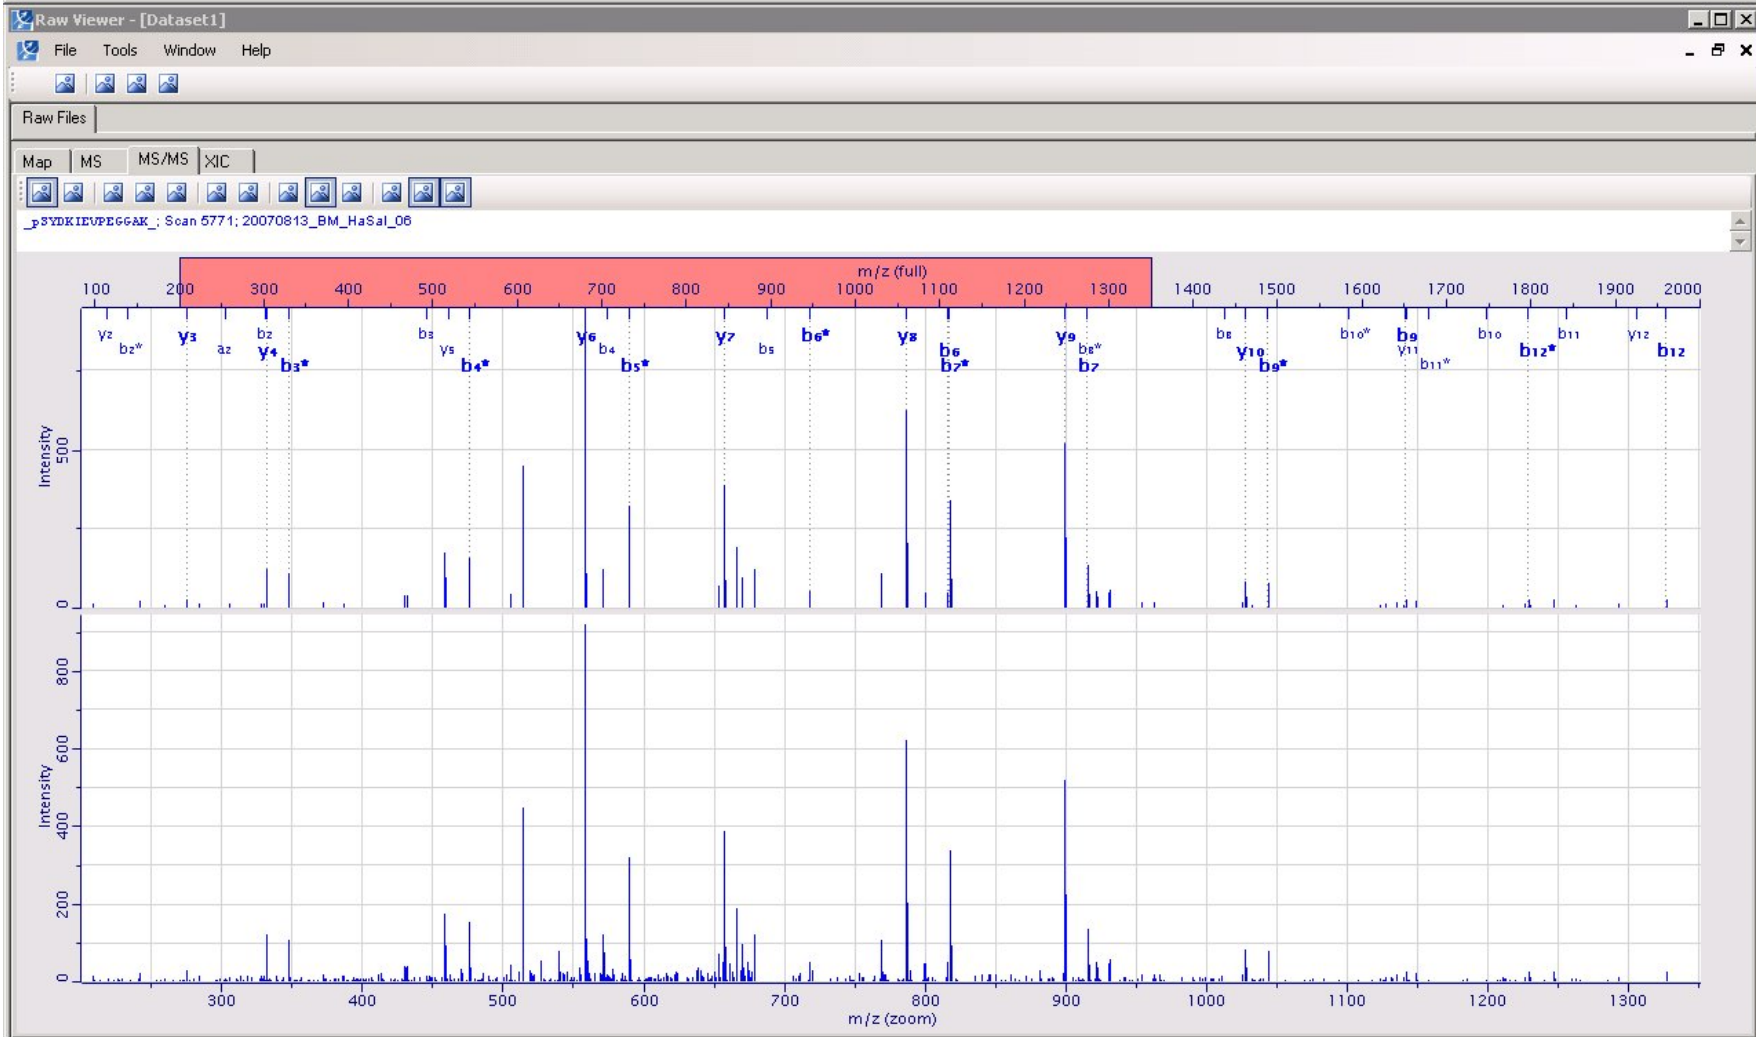

**Result Explorer**

Summary | Identifications | Modifications | All Peptides | MS Scans | MS/MS Scans | All Proteins

Protein Groups | Peptides | **Modification-Specific Peptides** | Evidence | MS/MS

|      | Sequence                  | Modifications             | Mass      | Mass Error [ppm] | Mass Fractional Part | Protein Groups | Proteins | Unique (Groups) | Unique (Protein) | Oxidatic (M) | phosph | N-Acety (Protein) | Slice Average | Slice Std. Dev. | Slice 1 | Slice 2 | Slice 3 |
|------|---------------------------|---------------------------|-----------|------------------|----------------------|----------------|----------|-----------------|------------------|--------------|--------|-------------------|---------------|-----------------|---------|---------|---------|
| ▶ 14 | STKPSQSELETETDTEPATTGHQQR | N-Acetyl (Protein),pho... | 2867.2094 | -0.20064         | 0.20944487           | 479            | DE2866R  | yes             | yes              | 0            | 1      | 1                 | 4             | 2               |         | 1       |         |

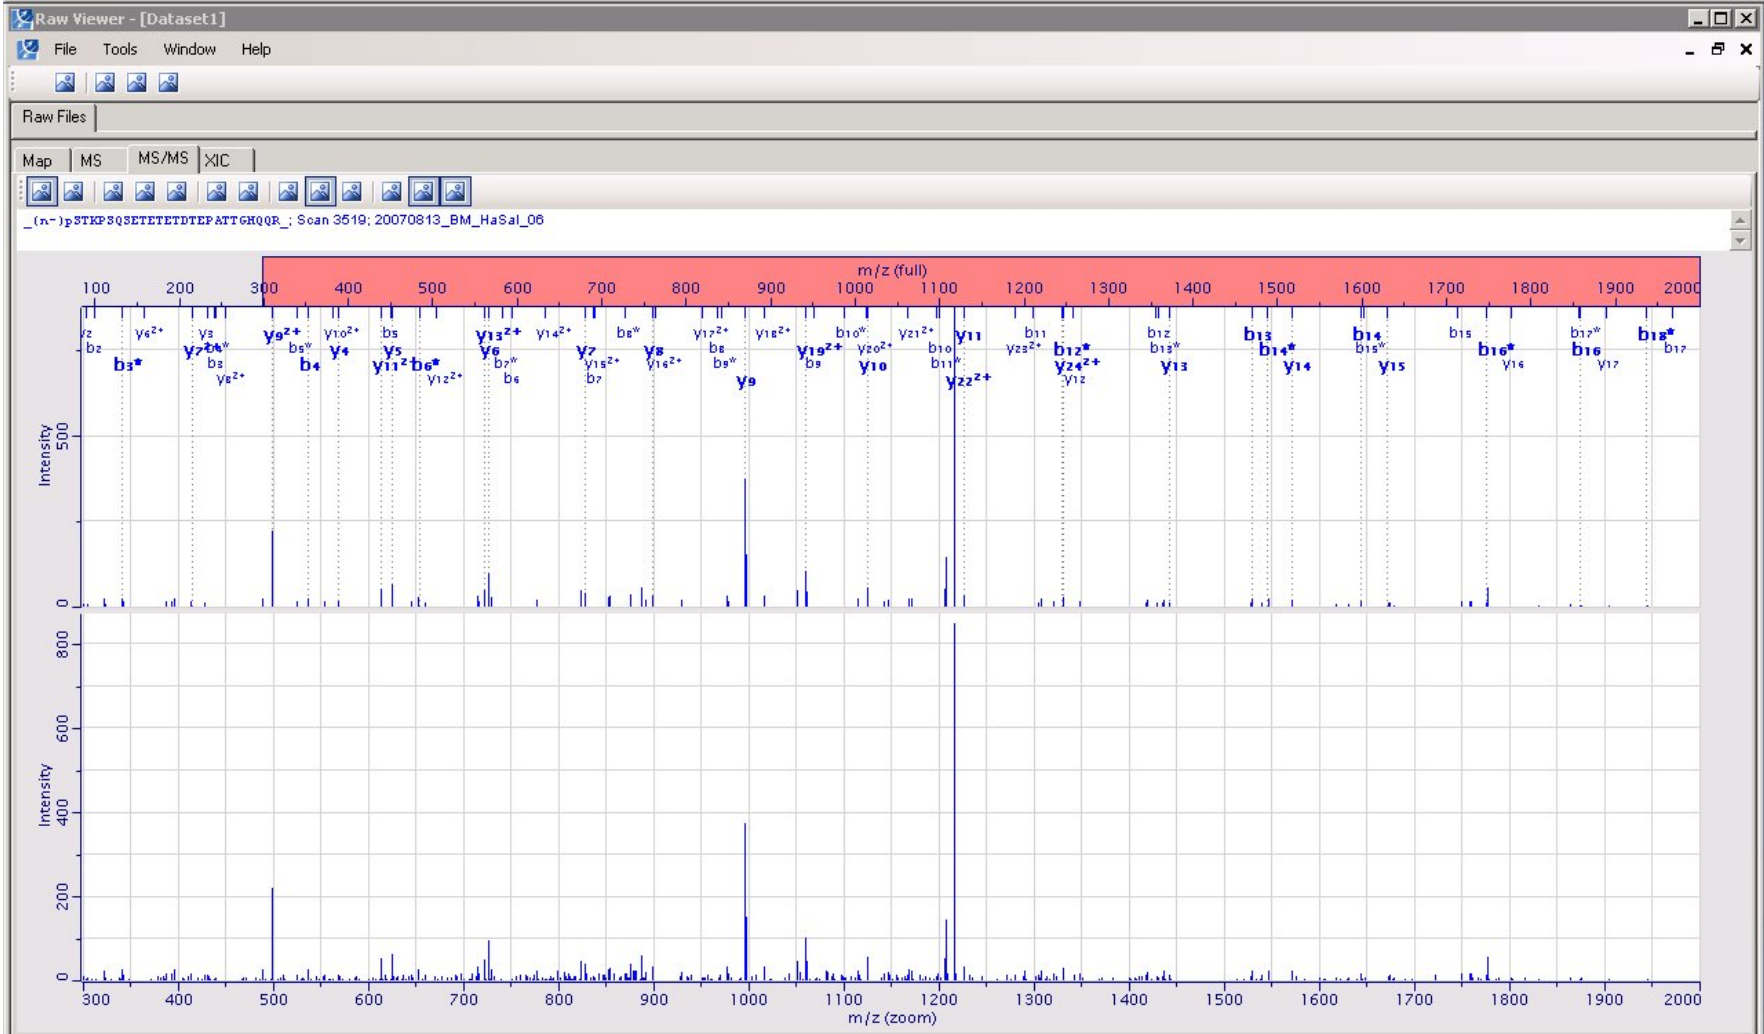

| Result Explorer                                                                                  |                |               |           |                  |                      |                |          |                 |                  |              |        |                   |               |                 |         |         |         |
|--------------------------------------------------------------------------------------------------|----------------|---------------|-----------|------------------|----------------------|----------------|----------|-----------------|------------------|--------------|--------|-------------------|---------------|-----------------|---------|---------|---------|
| Summary   Identifications   Modifications   All Peptides   MS Scans   MS/MS Scans   All Proteins |                |               |           |                  |                      |                |          |                 |                  |              |        |                   |               |                 |         |         |         |
| Protein Groups   Peptides   Modification-Specific Peptides   Evidence   MS/MS                    |                |               |           |                  |                      |                |          |                 |                  |              |        |                   |               |                 |         |         |         |
|                                                                                                  | Sequence       | Modifications | Mass      | Mass Error [ppm] | Mass Fractional Part | Protein Groups | Proteins | Unique (Groups) | Unique (Protein) | Oxidatic (M) | phosph | N-Acety (Protein) | Slice Average | Slice Std. Dev. | Slice 1 | Slice 2 | Slice 3 |
| ▶ 15                                                                                             | SSVPDRADVADEYK | phospho(STY)  | 1630.6876 | -0.14607         | 0.68759713           | 732            | DE3807R  | yes             | yes              | 0            | 1      | 0                 | 5             | 0               |         |         |         |

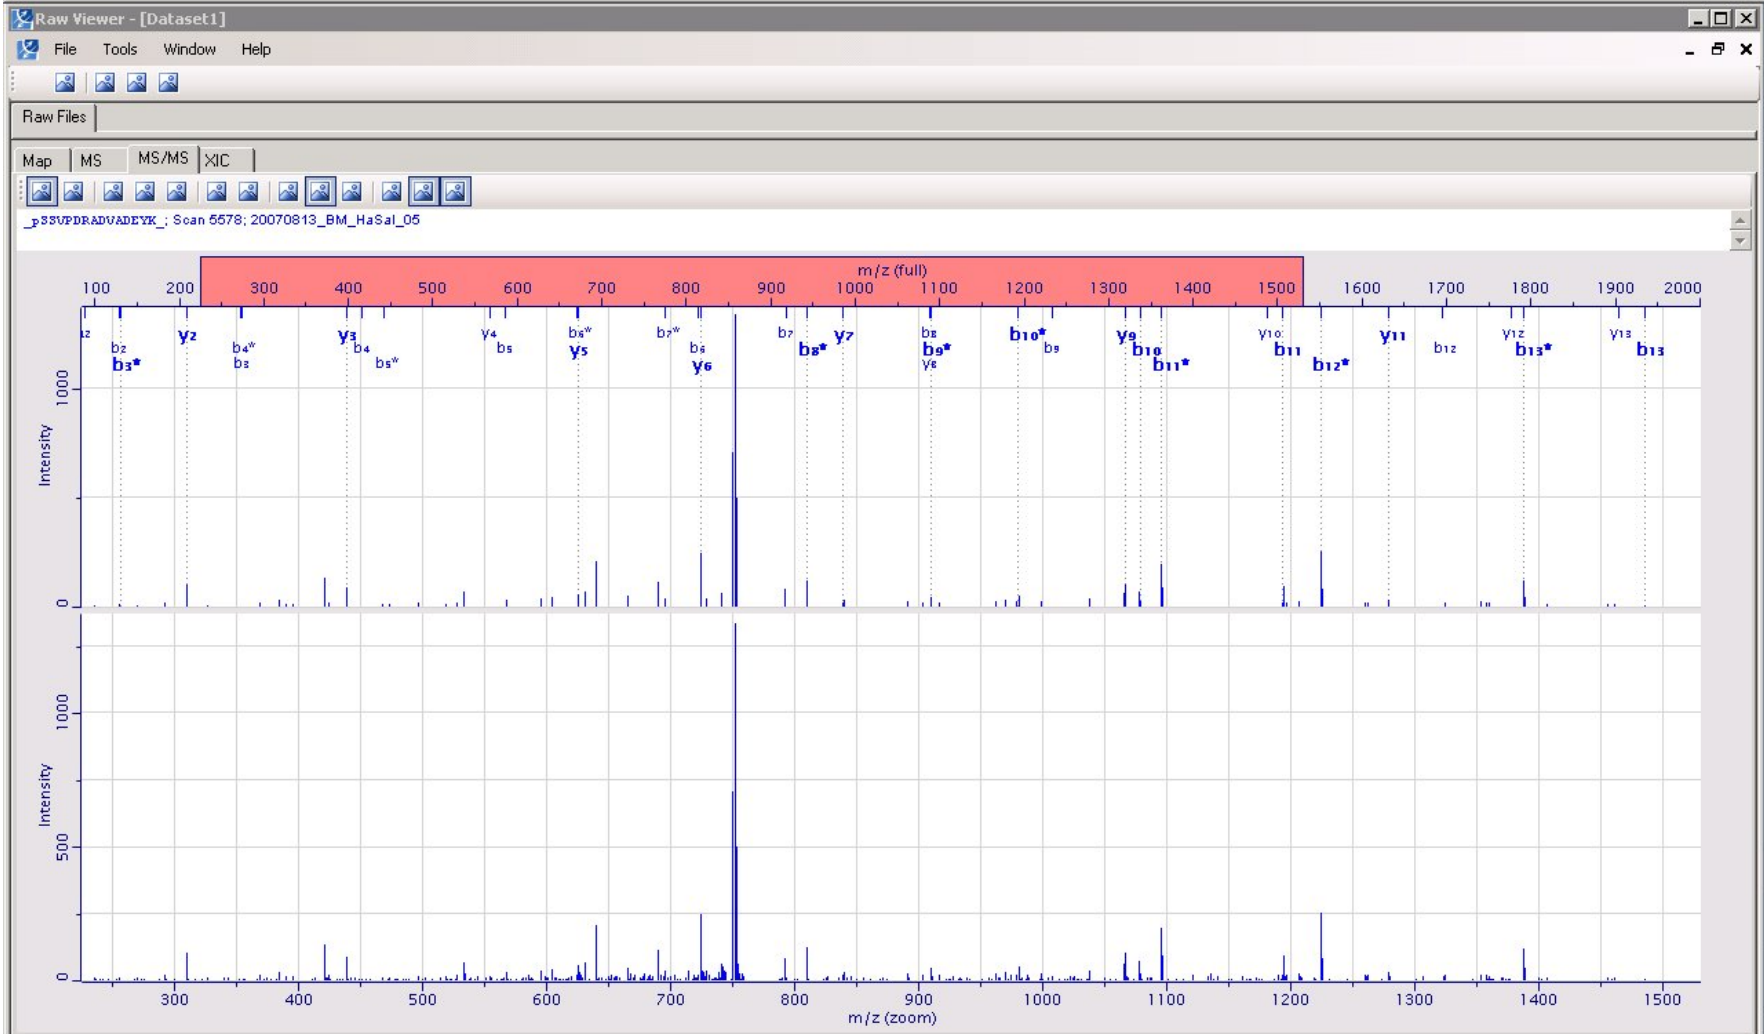

**Result Explorer**

Summary | Identifications | Modifications | All Peptides | MS Scans | MS/MS Scans | All Proteins

Protein Groups | Peptides | **Modification-Specific Peptides** | Evidence | MS/MS

|      | Sequence   | Modifications             | Mass     | Mass Error [ppm] | Mass Fractional Part | Protein Groups | Proteins | Unique (Groups) | Unique (Protein) | Oxidatic (M) | phosph | N-Acety (Protein) | Slice Average | Slice Std. Dev. | Slice 1 | Slice 2 | Slice 3 |
|------|------------|---------------------------|----------|------------------|----------------------|----------------|----------|-----------------|------------------|--------------|--------|-------------------|---------------|-----------------|---------|---------|---------|
| ▶ 15 | SSDQHLQVSK | N-Acetyl (Protein),pho... | 1249.534 | -0.17639         | 0.53400731           | 1040           | DE5202F  | yes             | yes              | 0            | 1      | 1                 | 9             | 0               |         |         |         |

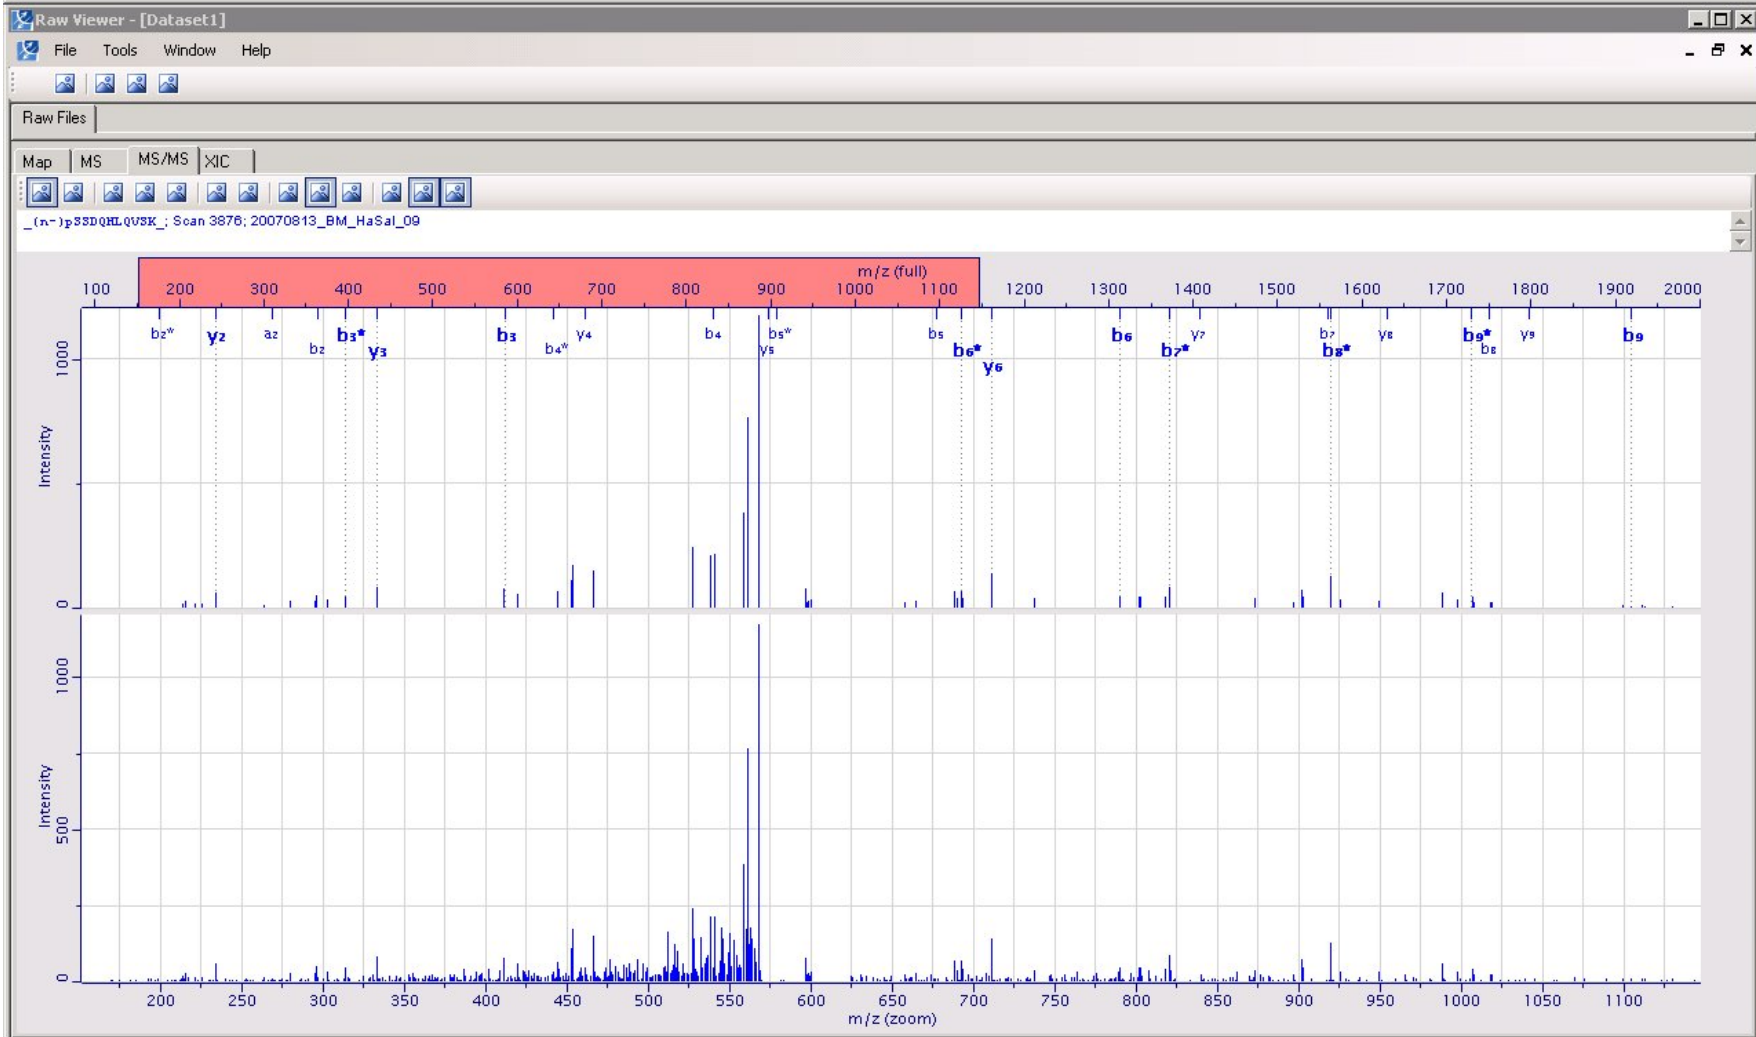



| Protein Groups | Peptides   | Modification-Specific Peptides | Evidence  | MS/MS            |                      |                |          |                 |                  |              |        |                   |               |                 |         |         |         |
|----------------|------------|--------------------------------|-----------|------------------|----------------------|----------------|----------|-----------------|------------------|--------------|--------|-------------------|---------------|-----------------|---------|---------|---------|
|                | Sequence   | Modifications                  | Mass      | Mass Error [ppm] | Mass Fractional Part | Protein Groups | Proteins | Unique (Groups) | Unique (Protein) | Oxidatic (M) | phosph | N-Acety (Protein) | Slice Average | Slice Std. Dev. | Slice 1 | Slice 2 | Slice 3 |
| ▶ 17           | SSDQHLQVSK | phospho(STY)                   | 1207.5234 | 0.29699          | 0.52343234           | 1040           | DE5202F  | yes             | yes              | 0            | 1      | 0                 | 4.5           | 0.5             |         |         |         |

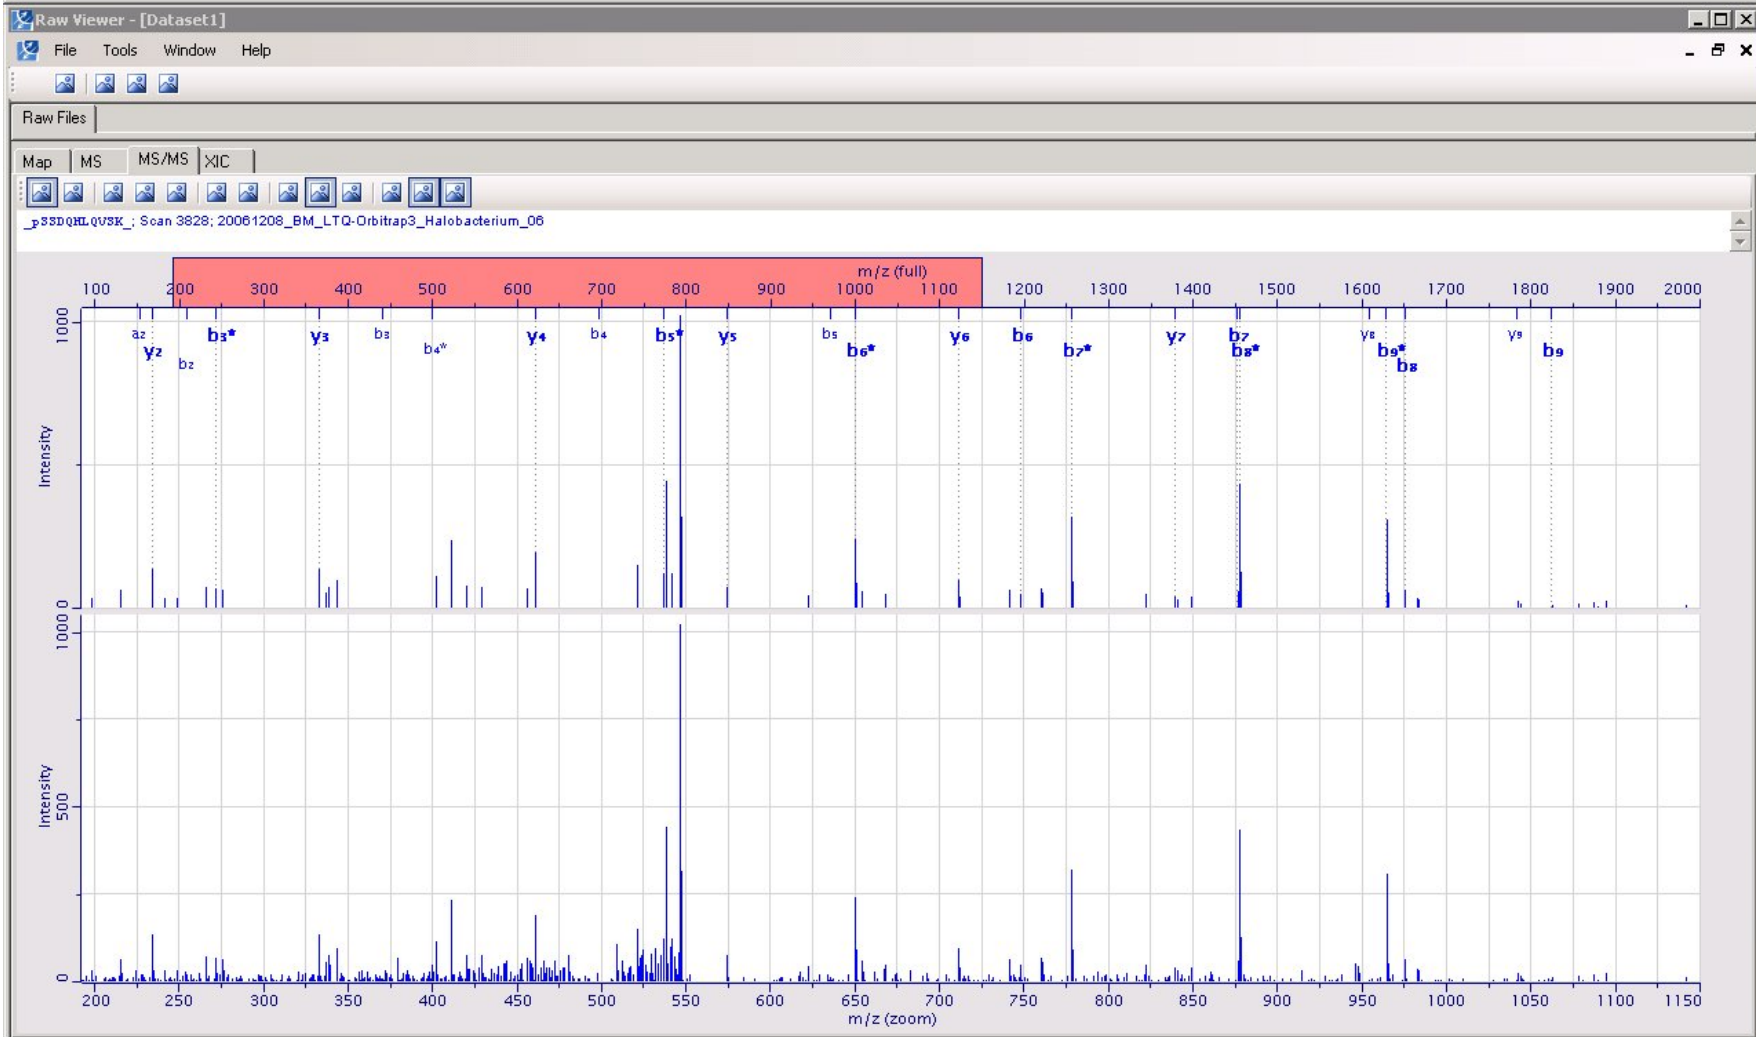

| Result Explorer                                                                                  |                            |                           |           |                  |                      |                |          |                 |                  |              |        |                    |               |                 |         |         |         |
|--------------------------------------------------------------------------------------------------|----------------------------|---------------------------|-----------|------------------|----------------------|----------------|----------|-----------------|------------------|--------------|--------|--------------------|---------------|-----------------|---------|---------|---------|
| Summary   Identifications   Modifications   All Peptides   MS Scans   MS/MS Scans   All Proteins |                            |                           |           |                  |                      |                |          |                 |                  |              |        |                    |               |                 |         |         |         |
| Protein Groups   Peptides   Modification-Specific Peptides   Evidence   MS/MS                    |                            |                           |           |                  |                      |                |          |                 |                  |              |        |                    |               |                 |         |         |         |
|                                                                                                  | Sequence                   | Modifications             | Mass      | Mass Error [ppm] | Mass Fractional Part | Protein Groups | Proteins | Unique (Groups) | Unique (Protein) | Oxidatic (M) | phosph | N-Acetyl (Protein) | Slice Average | Slice Std. Dev. | Slice 1 | Slice 2 | Slice 3 |
| ▶ 10                                                                                             | SQQSIQSTADADQHSQPLVEVTDLKK | N-Acetyl (Protein),pho... | 2974.3921 | -0.46636         | 0.39210068           | 865            | DE4301R  | yes             | yes              | 0            | 1      | 1                  | 4             | 2               |         | 1       |         |

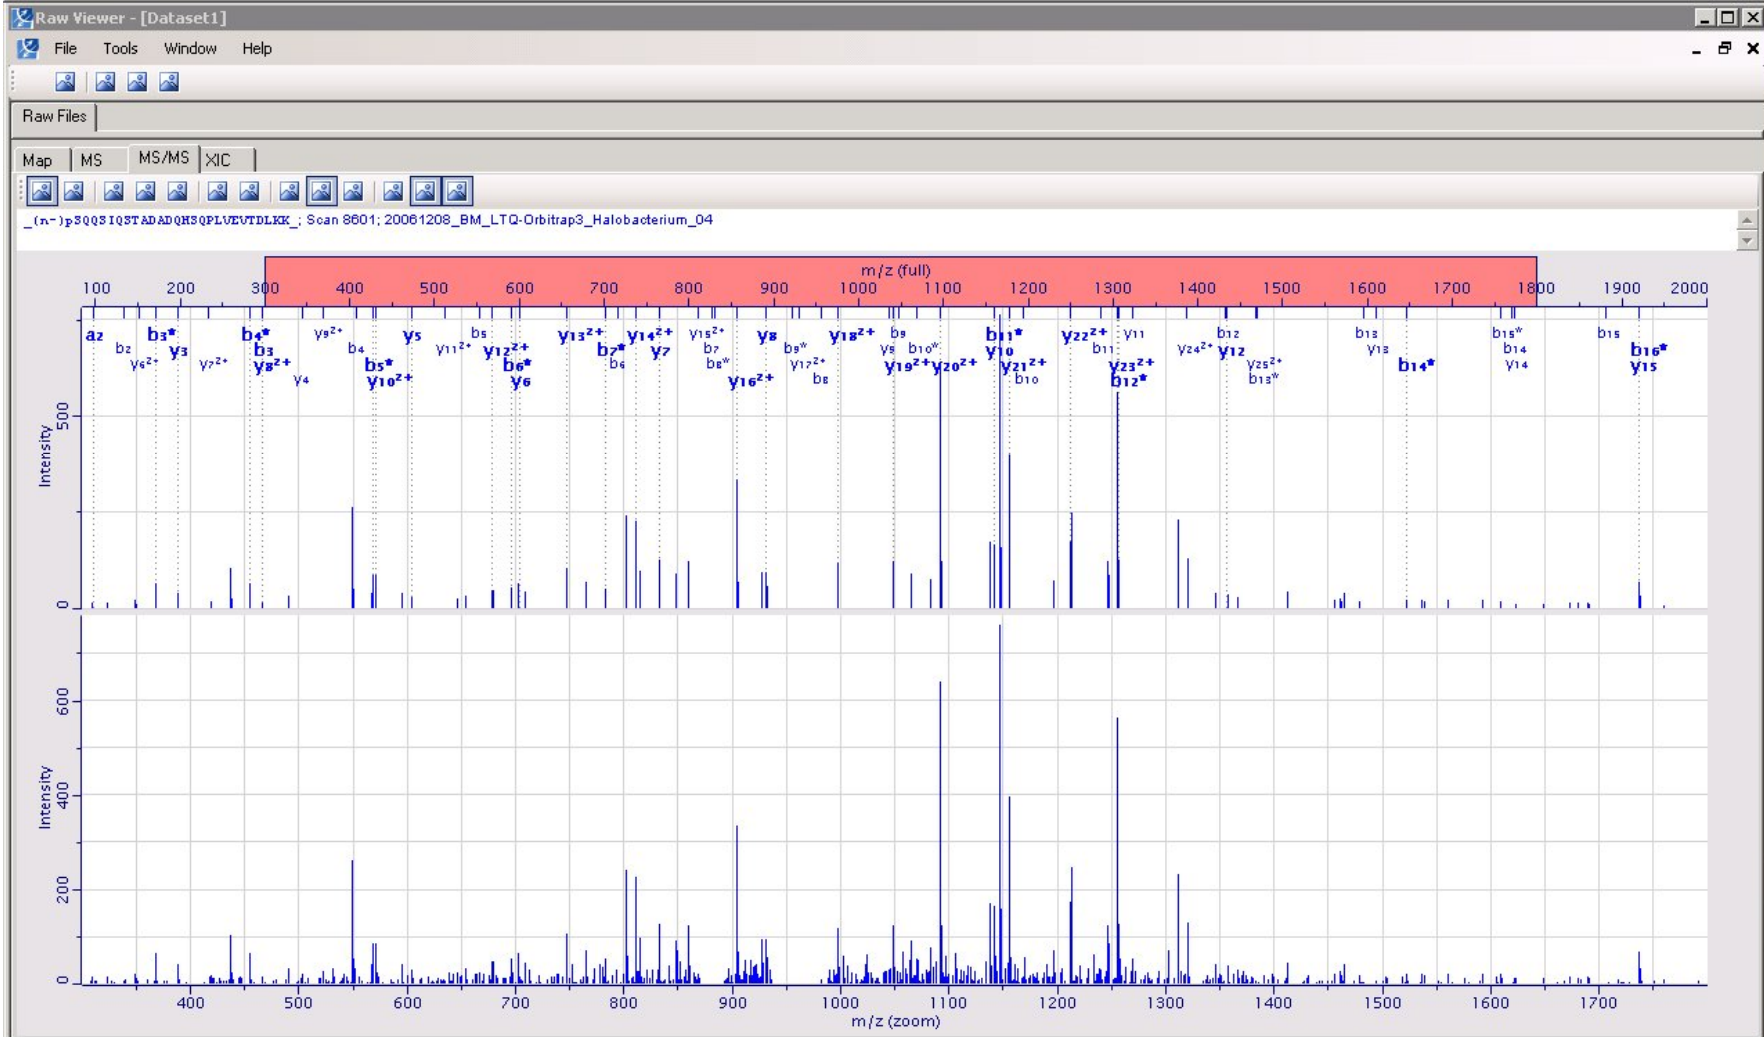

**Result Explorer**

Summary | Identifications | Modifications | All Peptides | MS Scans | MS/MS Scans | All Proteins

Protein Groups | Peptides | **Modification-Specific Peptides** | Evidence | MS/MS

|      | Sequence                    | Modifications           | Mass      | Mass Error [ppm] | Mass Fractional Part | Protein Groups | Proteins | Unique (Groups) | Unique (Protein) | Oxidatic (M) | phosph | N-Acety (Protein) | Slice Average | Slice Std. Dev. | Slice 1 | Slice 2 | Slice 3 |
|------|-----------------------------|-------------------------|-----------|------------------|----------------------|----------------|----------|-----------------|------------------|--------------|--------|-------------------|---------------|-----------------|---------|---------|---------|
| ▶ 19 | SQHDGGDTEAGLDAYNGDVIDMES... | Oxidation (M),phosph... | 3484.4614 | -0.028182        | 0.4613793            | 819            | DE4122R  | yes             | yes              | 1            | 1      | 0                 | 5             | 0               |         |         |         |

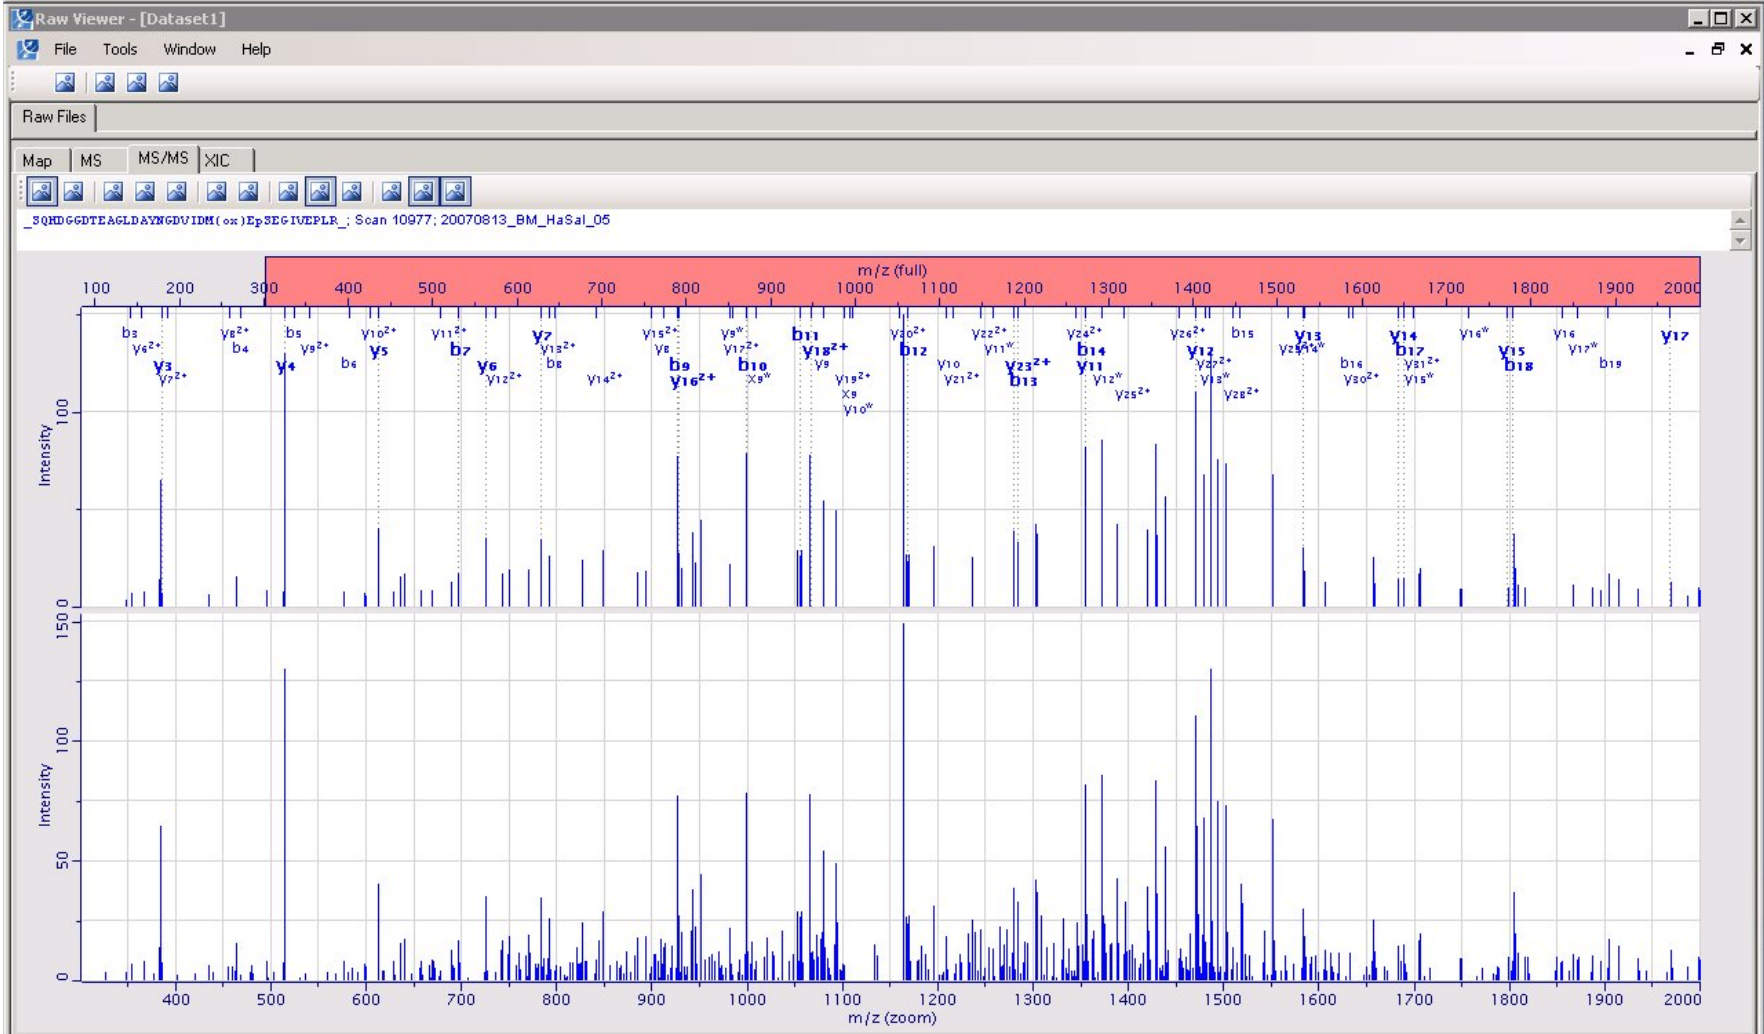

**Result Explorer**

Summary | Identifications | Modifications | All Peptides | MS Scans | MS/MS Scans | All Proteins

Protein Groups | Peptides | **Modification-Specific Peptides** | Evidence | MS/MS

|      | Sequence       | Modifications | Mass      | Mass Error [ppm] | Mass Fractional Part | Protein Groups | Proteins | Unique (Groups) | Unique (Protein) | Oxidative (M) | phosph | N-Acety (Protein) | Slice Average | Slice Std. Dev. | Slice 1 | Slice 2 | Slice 3 |
|------|----------------|---------------|-----------|------------------|----------------------|----------------|----------|-----------------|------------------|---------------|--------|-------------------|---------------|-----------------|---------|---------|---------|
| ▶ 20 | SLETVVEDIRDEAR | phospho(STY)  | 1710.7826 | 0.58402          | 0.78256015           | 784            | DE3988R  | yes             | yes              | 0             | 1      | 0                 | 2             | 0               |         | 1       |         |

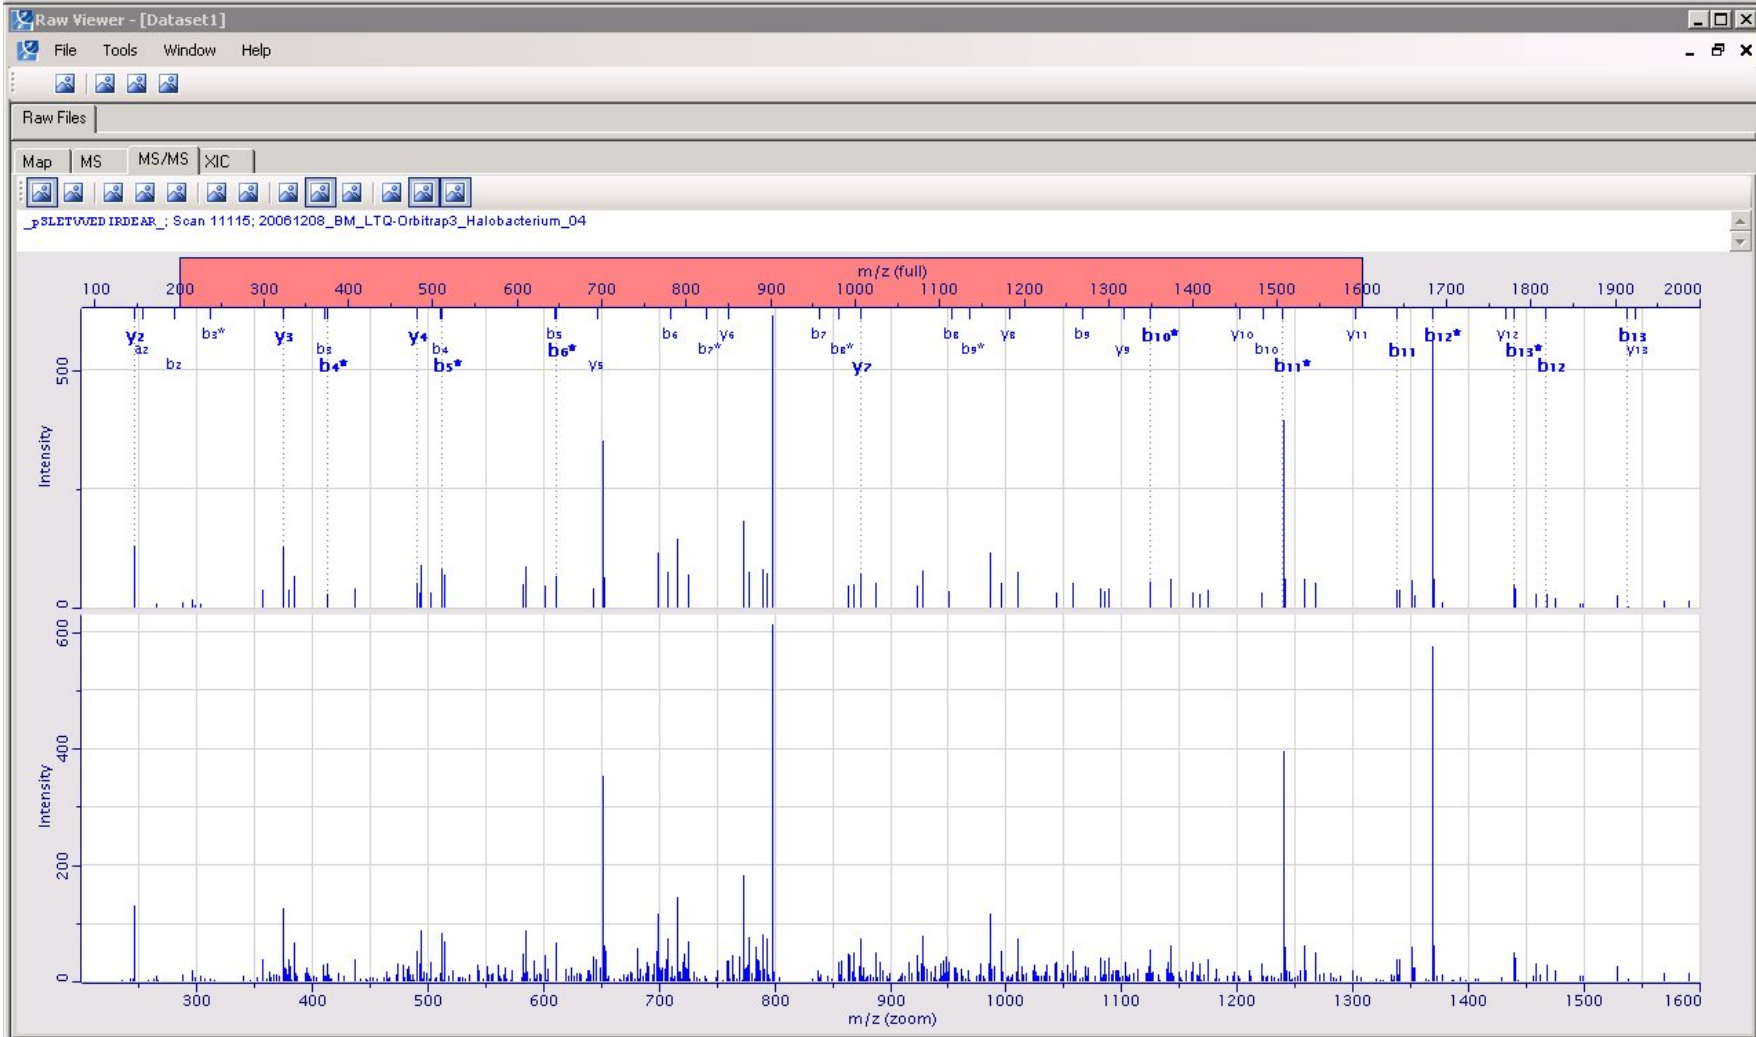

| Result Explorer                                                                                  |                   |               |           |                  |                      |                |          |                 |                  |              |        |                   |               |                 |         |         |         |
|--------------------------------------------------------------------------------------------------|-------------------|---------------|-----------|------------------|----------------------|----------------|----------|-----------------|------------------|--------------|--------|-------------------|---------------|-----------------|---------|---------|---------|
| Summary   Identifications   Modifications   All Peptides   MS Scans   MS/MS Scans   All Proteins |                   |               |           |                  |                      |                |          |                 |                  |              |        |                   |               |                 |         |         |         |
| Protein Groups   Peptides   Modification-Specific Peptides   Evidence   MS/MS                    |                   |               |           |                  |                      |                |          |                 |                  |              |        |                   |               |                 |         |         |         |
|                                                                                                  | Sequence          | Modifications | Mass      | Mass Error [ppm] | Mass Fractional Part | Protein Groups | Proteins | Unique (Groups) | Unique (Protein) | Oxidatic (M) | phosph | N-Acety (Protein) | Slice Average | Slice Std. Dev. | Slice 1 | Slice 2 | Slice 3 |
| ▶21                                                                                              | SKSELGREPTETTVEPR | phospho(STY)  | 2051.9525 | 0.11169          | 0.95247902           | 603            | DE3357R  | yes             | yes              | 0            | 1      | 0                 | 3             | 0               |         |         | 2       |

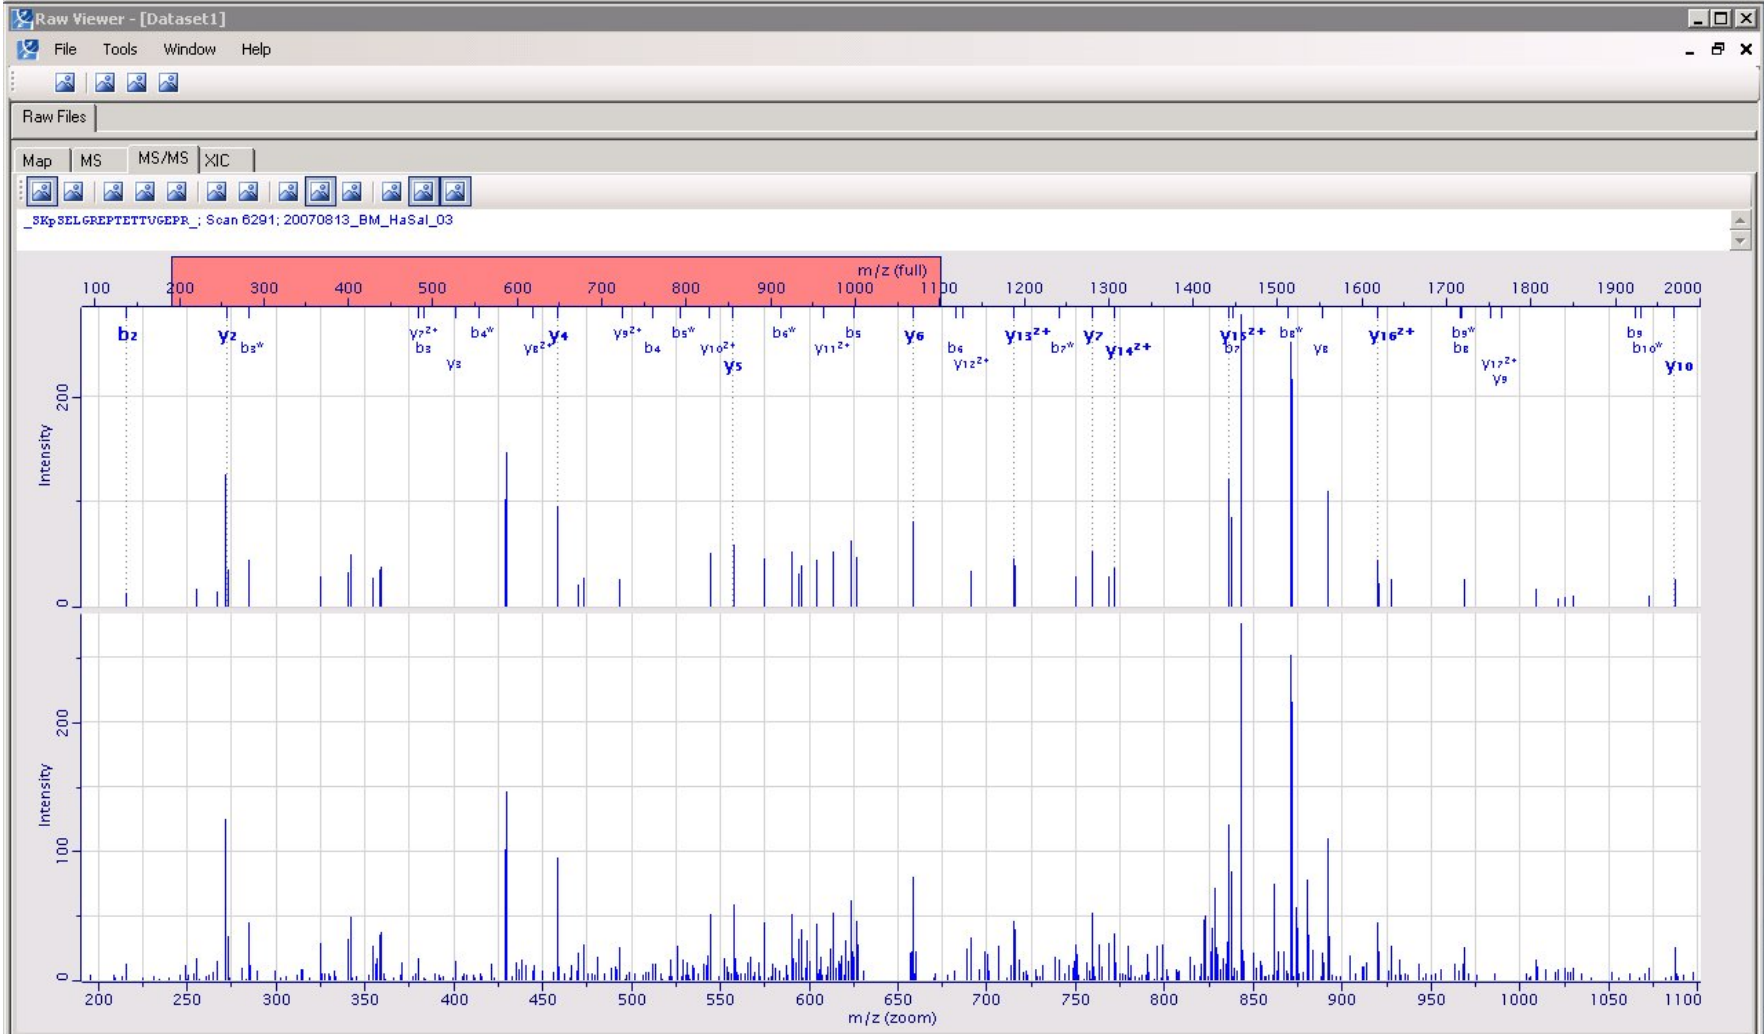

**Result Explorer**

Summary | Identifications | Modifications | All Peptides | MS Scans | MS/MS Scans | All Proteins

Protein Groups | Peptides | **Modification-Specific Peptides** | Evidence | MS/MS

|      | Sequence       | Modifications | Mass      | Mass Error [ppm] | Mass Fractional Part | Protein Groups | Proteins | Unique (Groups) | Unique (Protein) | Oxidatic (M) | phosph | N-Acety (Protein) | Slice Average | Slice Std. Dev. | Slice 1 | Slice 2 | Slice 3 |
|------|----------------|---------------|-----------|------------------|----------------------|----------------|----------|-----------------|------------------|--------------|--------|-------------------|---------------|-----------------|---------|---------|---------|
| ▶ 22 | SGNPDDRLLELRQR | phospho(STY)  | 1878.8221 | 1.045            | 0.82213355           | 736            | DE3815R  | yes             | yes              | 0            | 1      | 0                 | 7             | 0               |         |         |         |

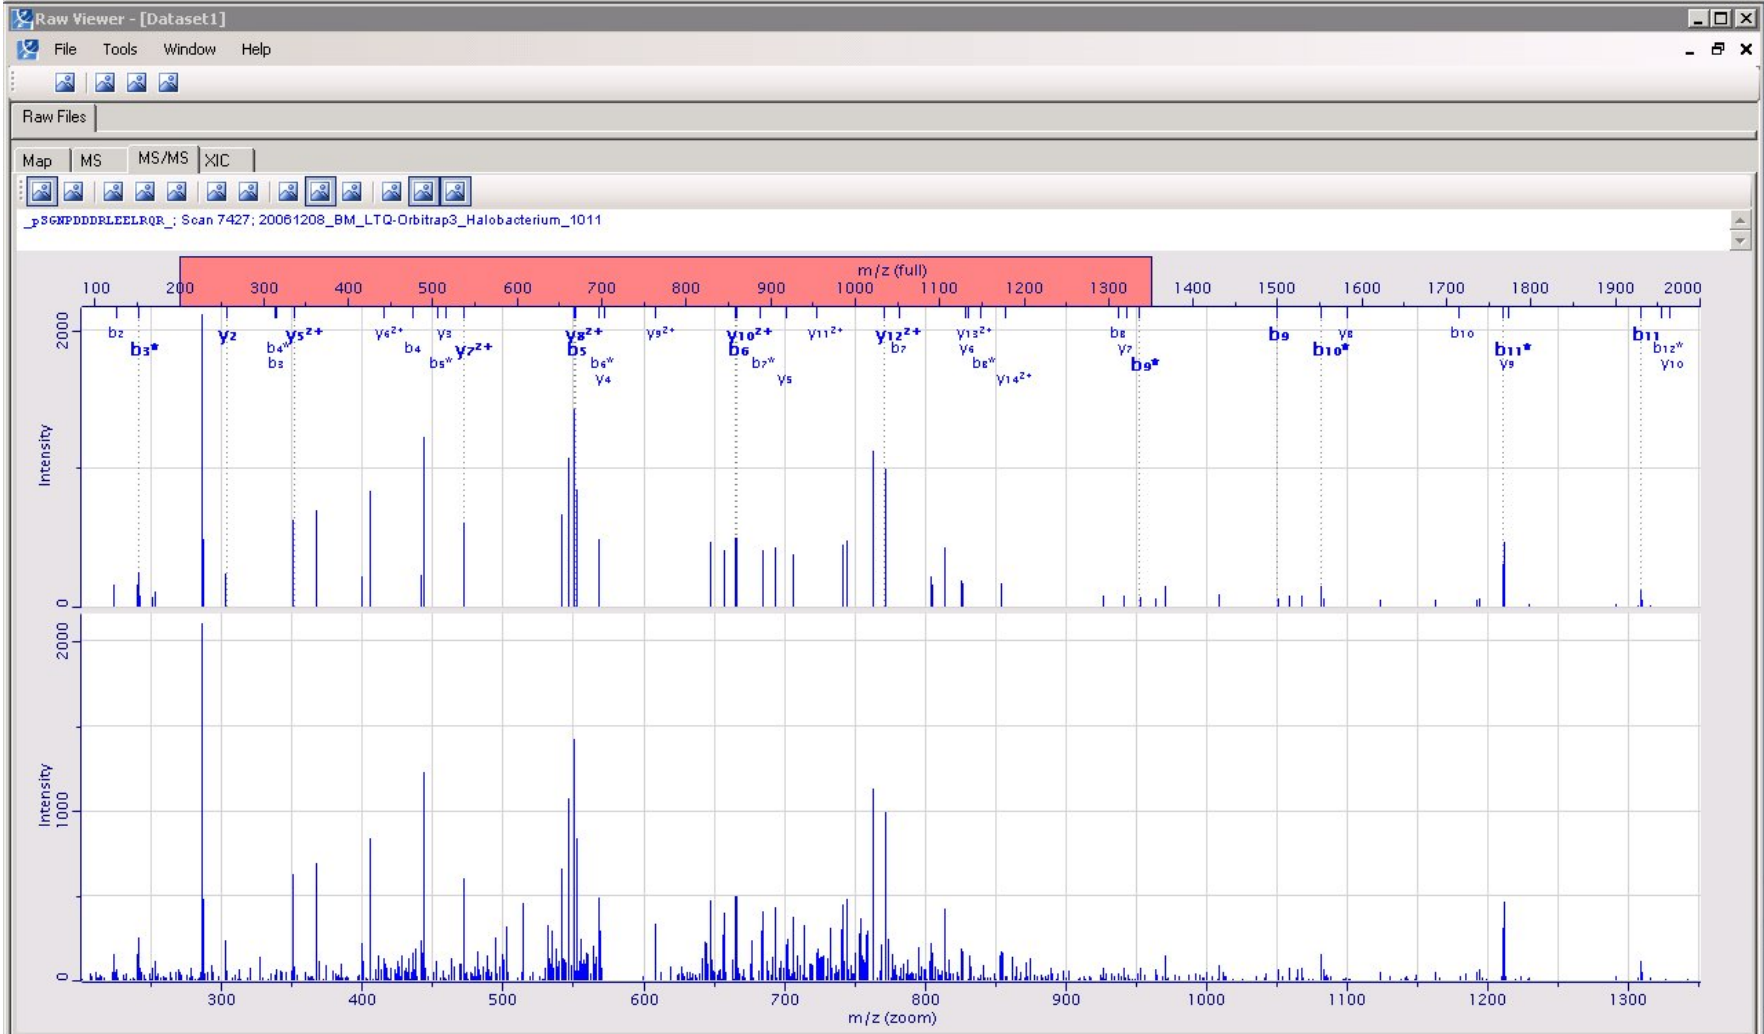

Result Explorer

Summary | Identifications | Modifications | All Peptides | MS Scans | MS/MS Scans | All Proteins

Protein Groups | Peptides | Modification-Specific Peptides | Evidence | MS/MS

|      | Sequence     | Modifications             | Mass     | Mass Error [ppm] | Mass Fractional Part | Protein Groups | Proteins | Unique (Groups) | Unique (Protein) | Oxidatic (M) | phosph | N-Acety (Protein) | Slice Average | Slice Std. Dev. | Slice 1 | Slice 2 | Slice 3 |
|------|--------------|---------------------------|----------|------------------|----------------------|----------------|----------|-----------------|------------------|--------------|--------|-------------------|---------------|-----------------|---------|---------|---------|
| ▶ 23 | SGNPDDRLEELR | N-Acetyl (Protein),pho... | 1636.673 | 0.098848         | 0.67301998           | 736            | DE3815R  | yes             | yes              | 0            | 1      | 1                 | 9             | 0               |         |         |         |

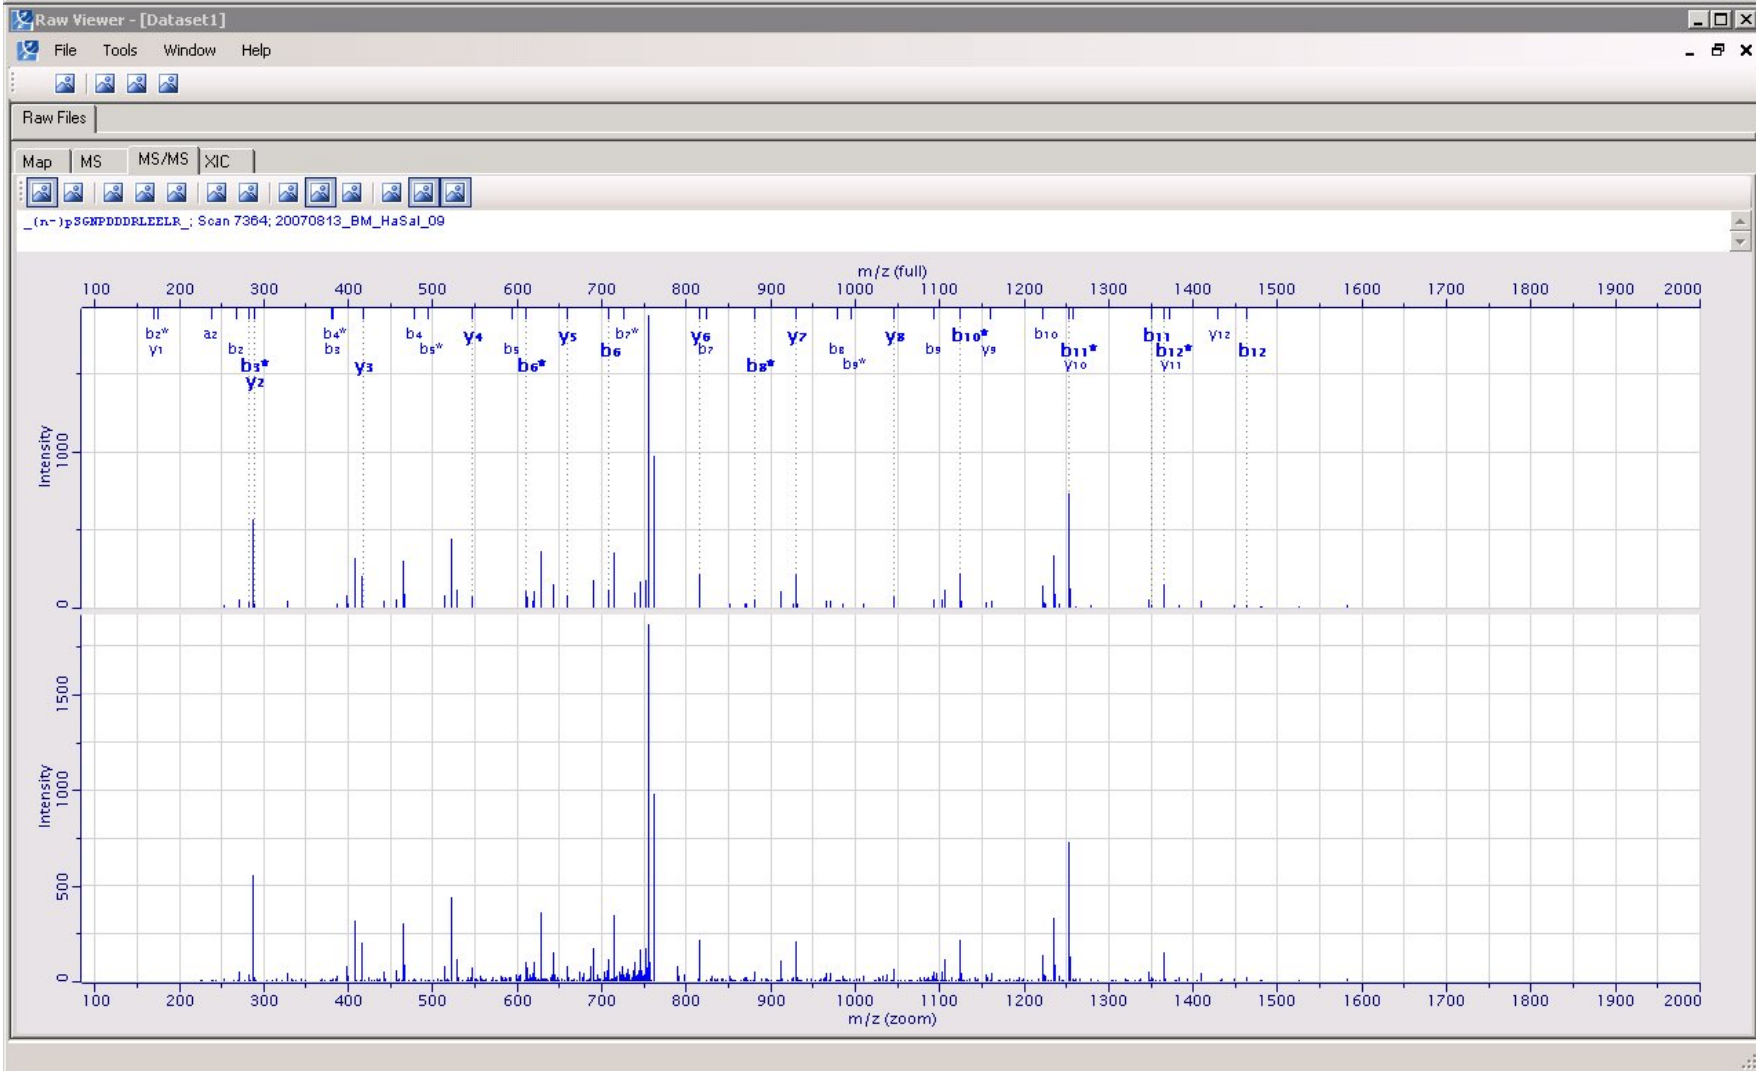

| Result Explorer                                                                                  |              |               |           |                  |                      |                |          |                 |                  |              |        |                   |               |                 |         |         |         |
|--------------------------------------------------------------------------------------------------|--------------|---------------|-----------|------------------|----------------------|----------------|----------|-----------------|------------------|--------------|--------|-------------------|---------------|-----------------|---------|---------|---------|
| Summary   Identifications   Modifications   All Peptides   MS Scans   MS/MS Scans   All Proteins |              |               |           |                  |                      |                |          |                 |                  |              |        |                   |               |                 |         |         |         |
| Protein Groups   Peptides   Modification-Specific Peptides   Evidence   MS/MS                    |              |               |           |                  |                      |                |          |                 |                  |              |        |                   |               |                 |         |         |         |
|                                                                                                  | Sequence     | Modifications | Mass      | Mass Error [ppm] | Mass Fractional Part | Protein Groups | Proteins | Unique (Groups) | Unique (Protein) | Oxidatic (M) | phosph | N-Acety (Protein) | Slice Average | Slice Std. Dev. | Slice 1 | Slice 2 | Slice 3 |
| ▶24                                                                                              | SGNPDDRLEELR | phospho(STY)  | 1594.6624 | -0.23305         | 0.66244501           | 736            | DE3815R  | yes             | yes              | 0            | 1      | 0                 | 5             | 0               |         |         |         |

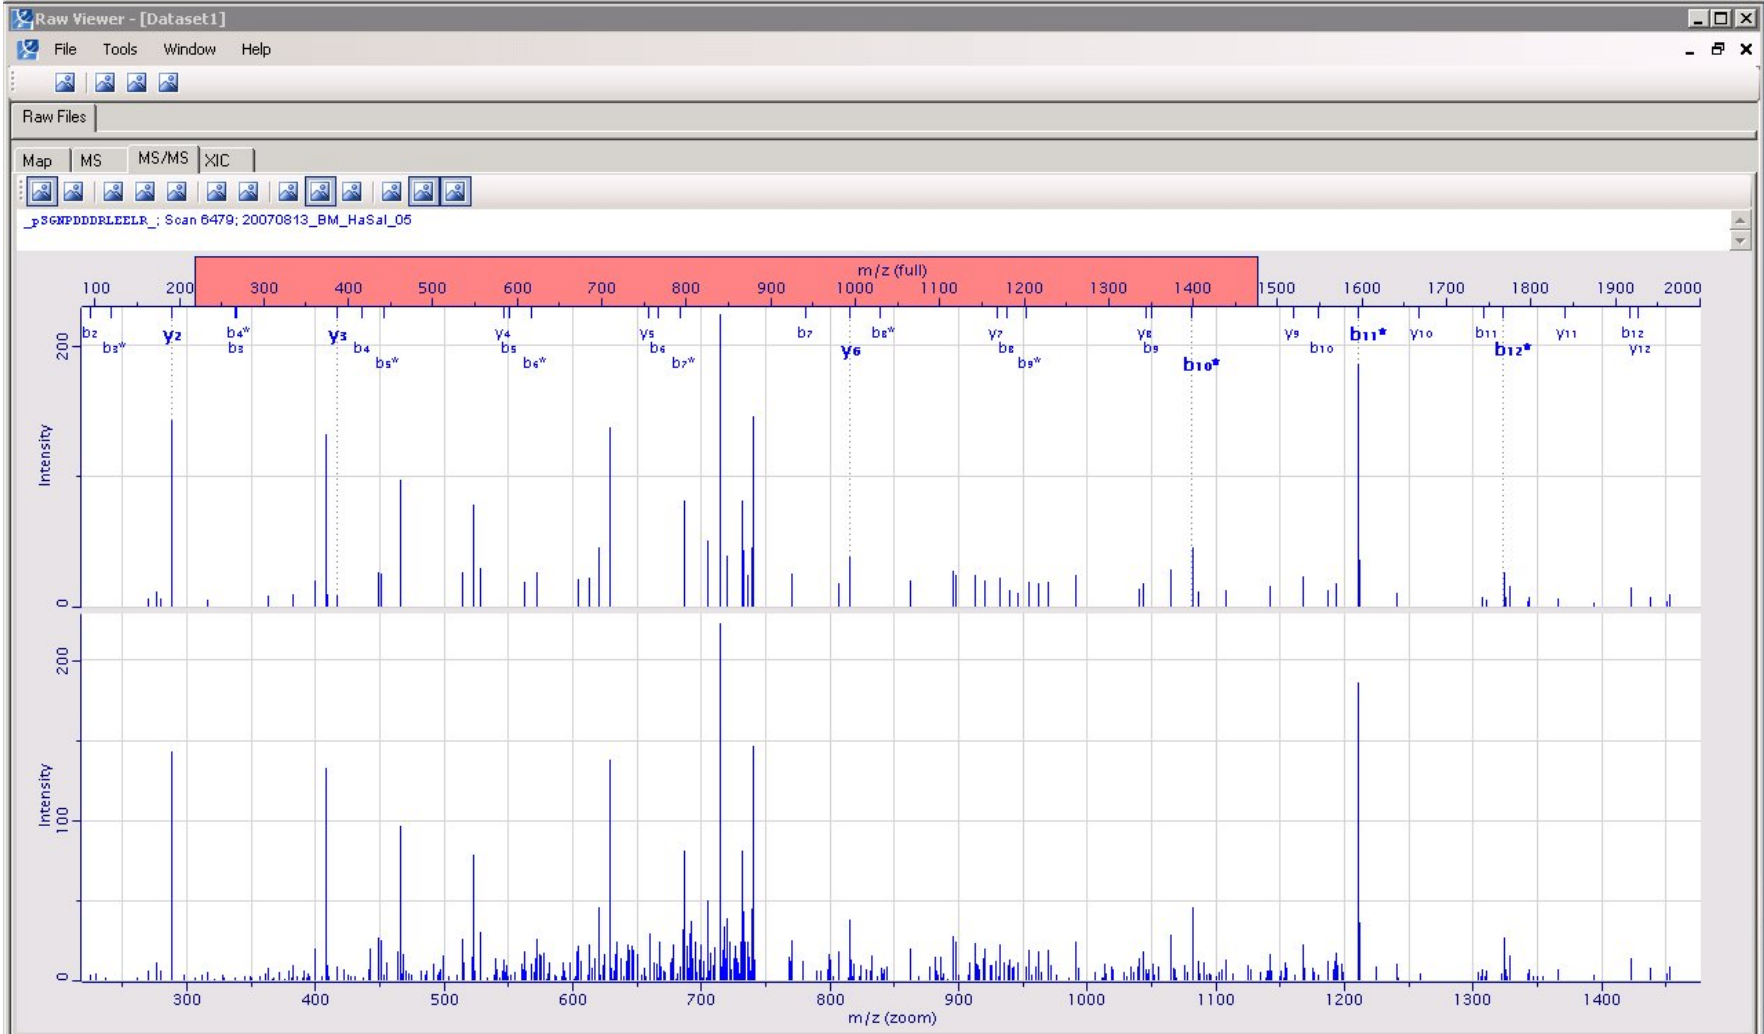



Result Explorer

Summary | Identifications | Modifications | All Peptides | MS Scans | MS/MS Scans | All Proteins

Protein Groups | Peptides | Modification-Specific Peptides | Evidence | MS/MS

|      | Sequence  | Modifications | Mass      | Mass Error [ppm] | Mass Fractional Part | Protein Groups | Proteins | Unique (Groups) | Unique (Protein) | Oxidatic (M) | phosph | N-Acety (Protein) | Slice Average | Slice Std. Dev. | Slice 1 | Slice 2 | Slice 3 |
|------|-----------|---------------|-----------|------------------|----------------------|----------------|----------|-----------------|------------------|--------------|--------|-------------------|---------------|-----------------|---------|---------|---------|
| ▶ 25 | SGDPGHVDR | phospho(STY)  | 1117.4554 | 0.21117          | 0.45535277           | 849            | DE4230F  | yes             | yes              | 0            | 1      | 0                 | 4             | 0               |         |         |         |

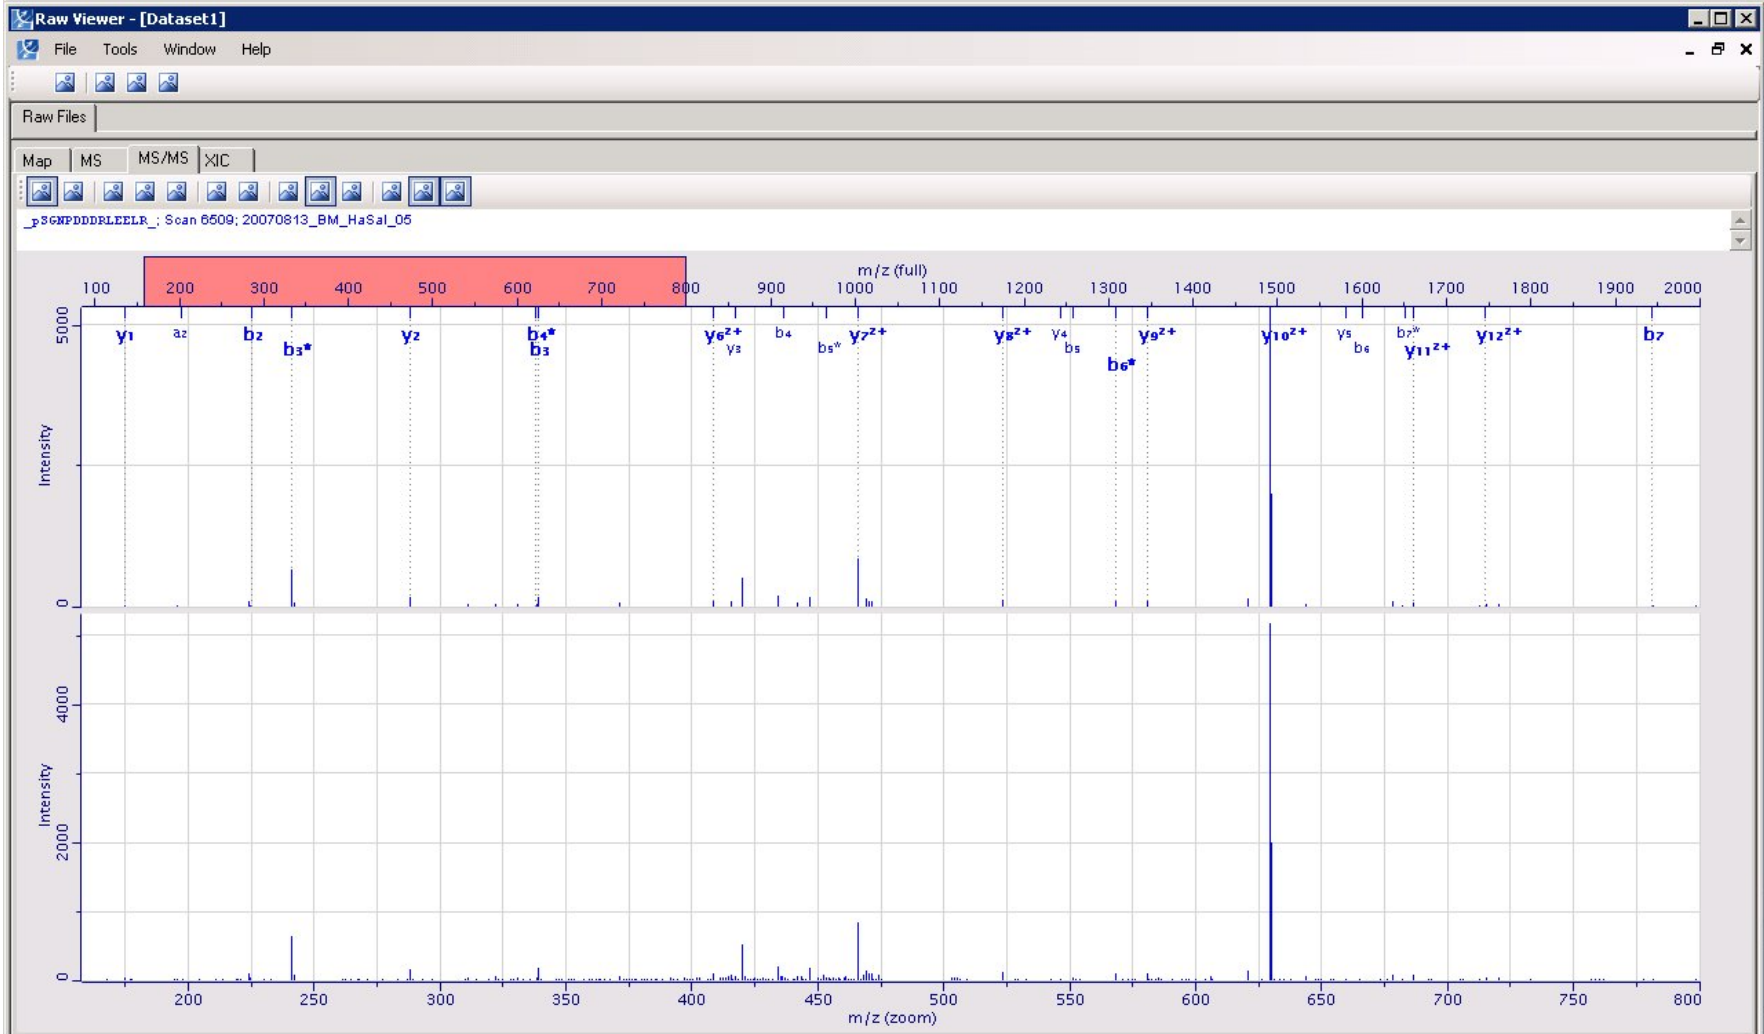

**Result Explorer**

Summary | Identifications | Modifications | All Peptides | MS Scans | MS/MS Scans | All Proteins

Protein Groups | Peptides | **Modification-Specific Peptides** | Evidence | MS/MS

|      | Sequence     | Modifications | Mass      | Mass Error [ppm] | Mass Fractional Part | Protein Groups | Proteins | Unique (Groups) | Unique (Protein) | Oxidatic (M) | phosph | N-Acety (Protein) | Slice Average | Slice Std. Dev. | Slice 1 | Slice 2 | Slice 3 |
|------|--------------|---------------|-----------|------------------|----------------------|----------------|----------|-----------------|------------------|--------------|--------|-------------------|---------------|-----------------|---------|---------|---------|
| ▶ 25 | SFEKGDVWLHEK | phospho(STY)  | 1567.7283 | -0.45869         | 0.72833974           | 469            | DE2847R  | yes             | yes              | 0            | 1      | 0                 | 2             | 0               |         | 1       |         |

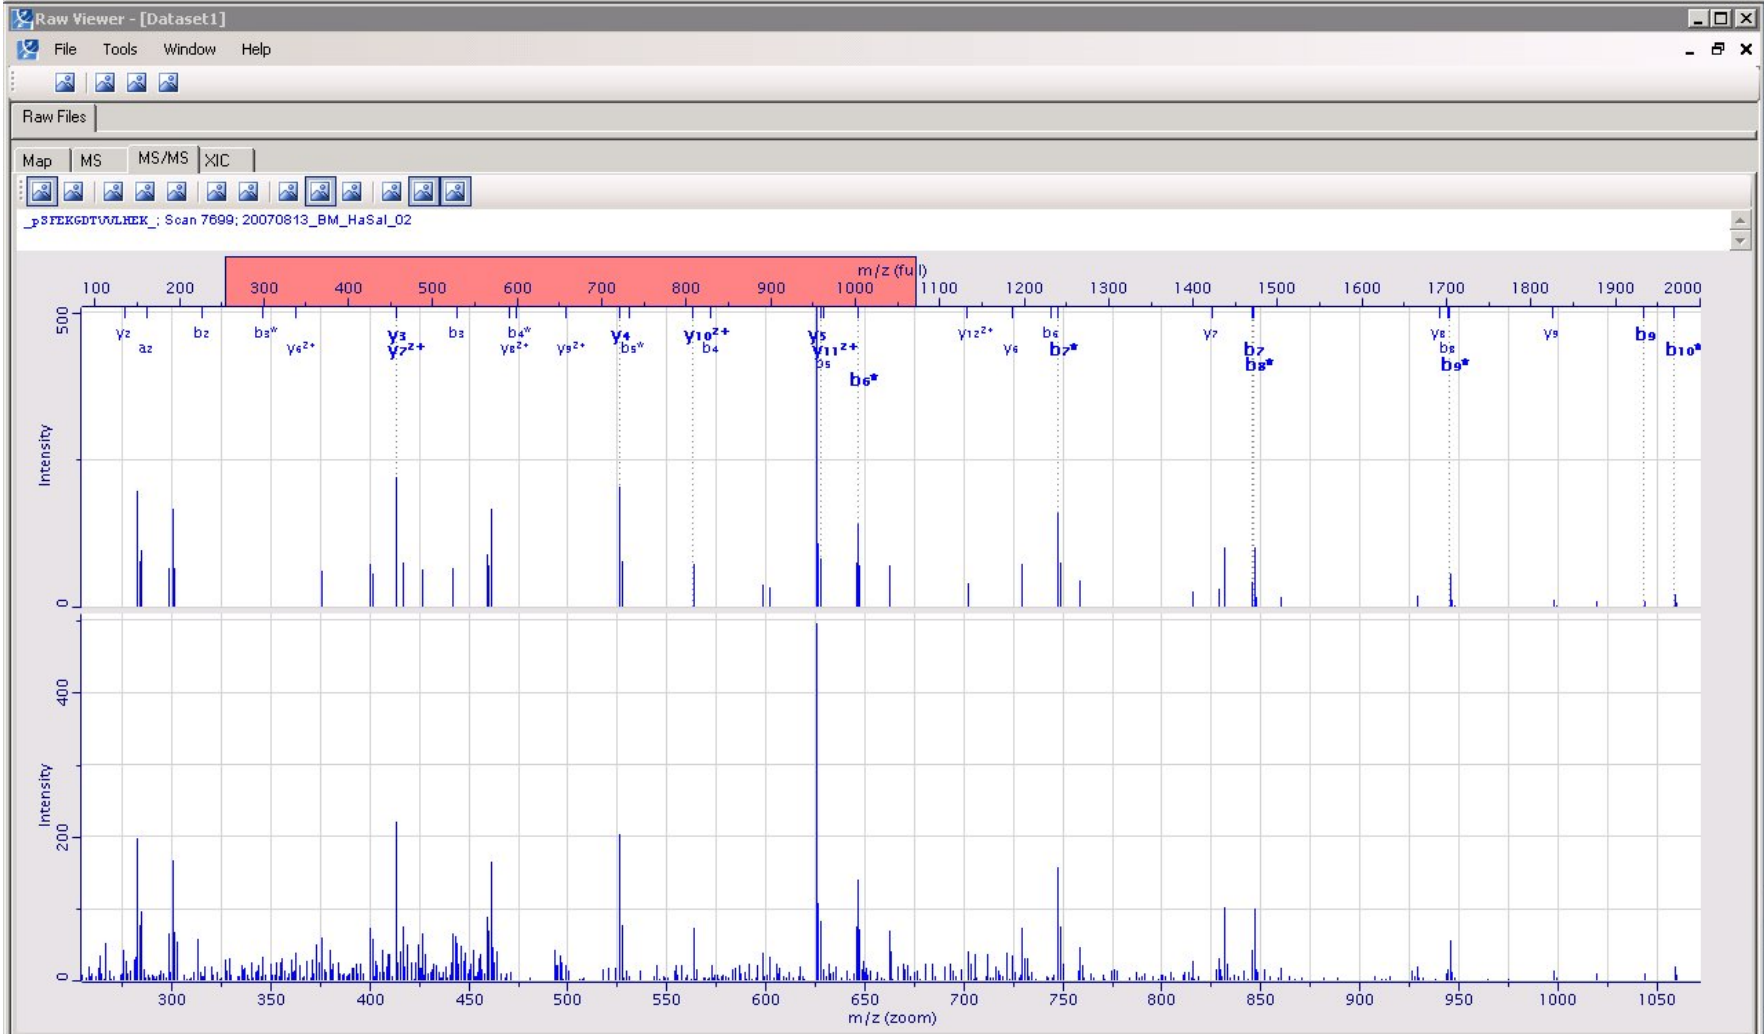

**Result Explorer**

Summary | Identifications | Modifications | All Peptides | MS Scans | MS/MS Scans | All Proteins

Protein Groups | Peptides | **Modification-Specific Peptides** | Evidence | MS/MS

|     | Sequence        | Modifications            | Mass      | Mass Error [ppm] | Mass Fractional Part | Protein Groups | Proteins | Unique (Groups) | Unique (Protein) | Oxidatic (M) | phosph | N-Acety (Protein) | Slice Average | Slice Std. Dev. | Slice 1 | Slice 2 | Slice 3 |
|-----|-----------------|--------------------------|-----------|------------------|----------------------|----------------|----------|-----------------|------------------|--------------|--------|-------------------|---------------|-----------------|---------|---------|---------|
| ▶27 | SETDSTDFHEMREPR | Oxidation (M),N-Acety... | 1973.7463 | -0.2565          | 0.74627205           | 620            | DE3407F  | yes             | yes              | 1            | 1      | 1                 | 5             | 0               |         |         |         |

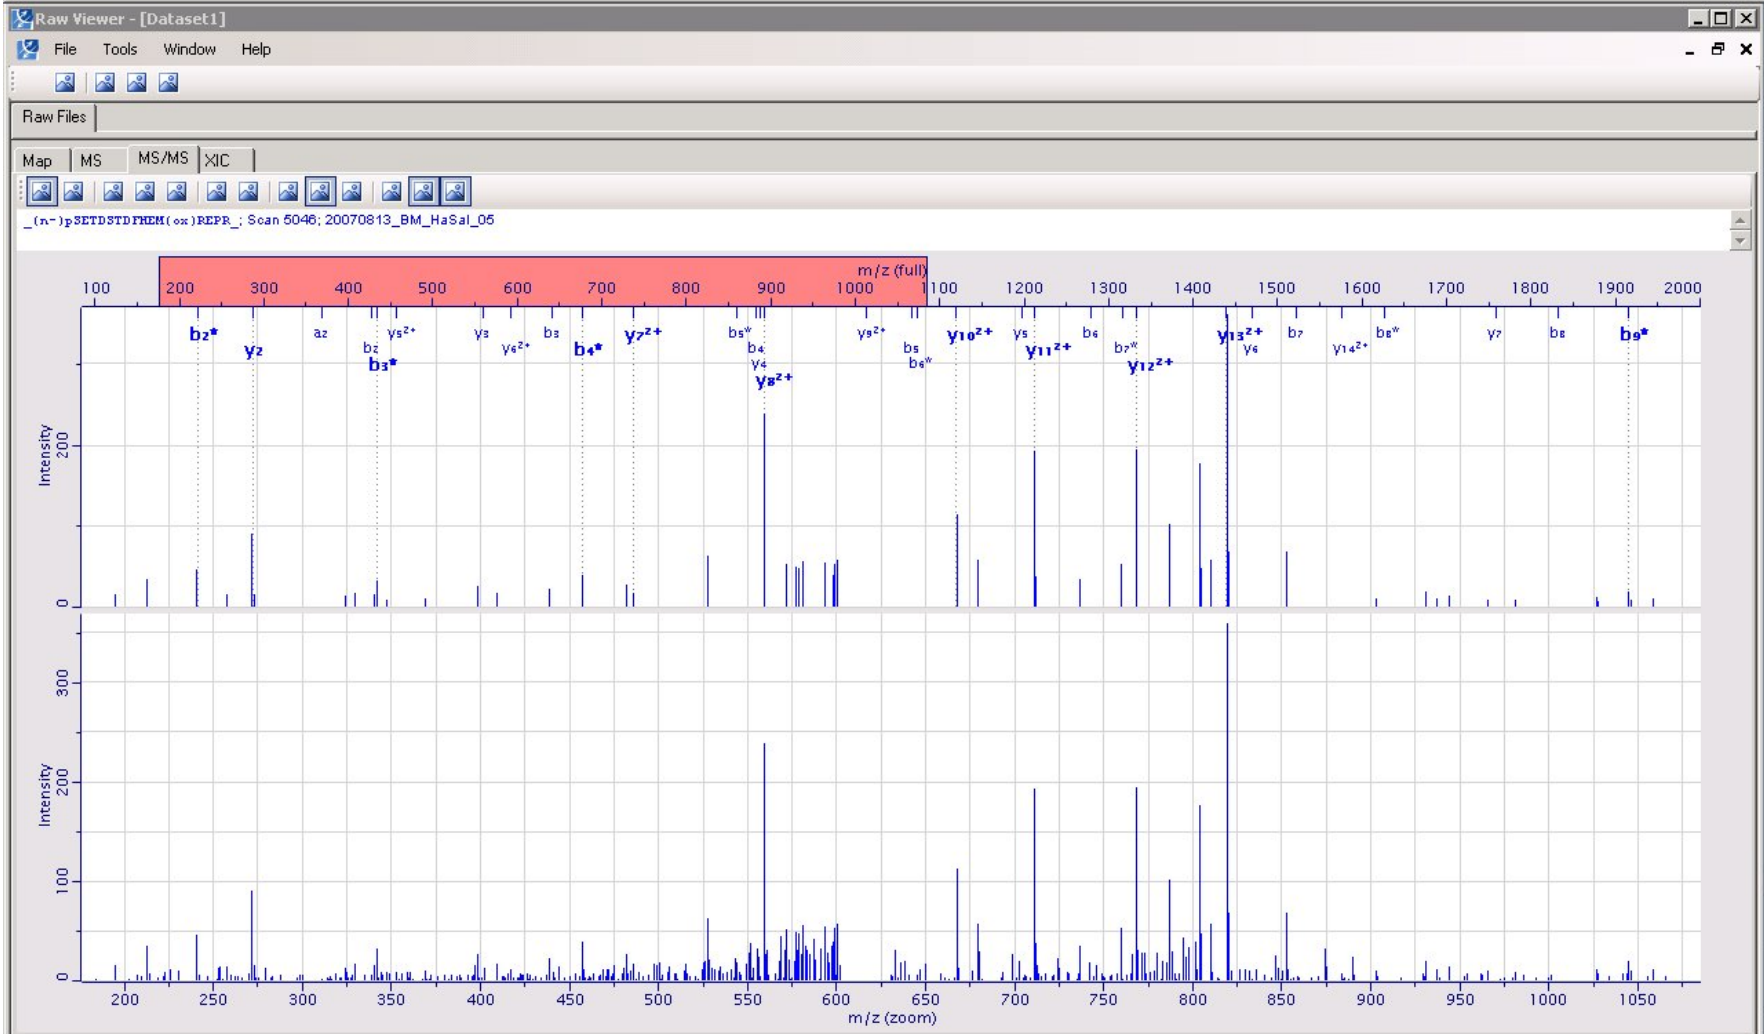

Result Explorer

Summary | Identifications | Modifications | All Peptides | MS Scans | MS/MS Scans | All Proteins

Protein Groups | Peptides | Modification-Specific Peptides | Evidence | MS/MS

|      | Sequence                    | Modifications | Mass      | Mass Error [ppm] | Mass Fractional Part | Protein Groups | Proteins | Unique (Groups) | Unique (Protein) | Oxidatic (M) | phosph | N-Acety (Protein) | Slice Average | Slice Std. Dev. | Slice 1 | Slice 2 | Slice 3 |
|------|-----------------------------|---------------|-----------|------------------|----------------------|----------------|----------|-----------------|------------------|--------------|--------|-------------------|---------------|-----------------|---------|---------|---------|
| ▶ 28 | SDTSTTDANSDSGADGDSSEAWLD... | phospho(STY)  | 3176.3055 | -0.24986         | 0.30551982           | 424            | OE2676R  | yes             | yes              | 0            | 1      | 0                 | 7.5           | 0.5             |         |         |         |

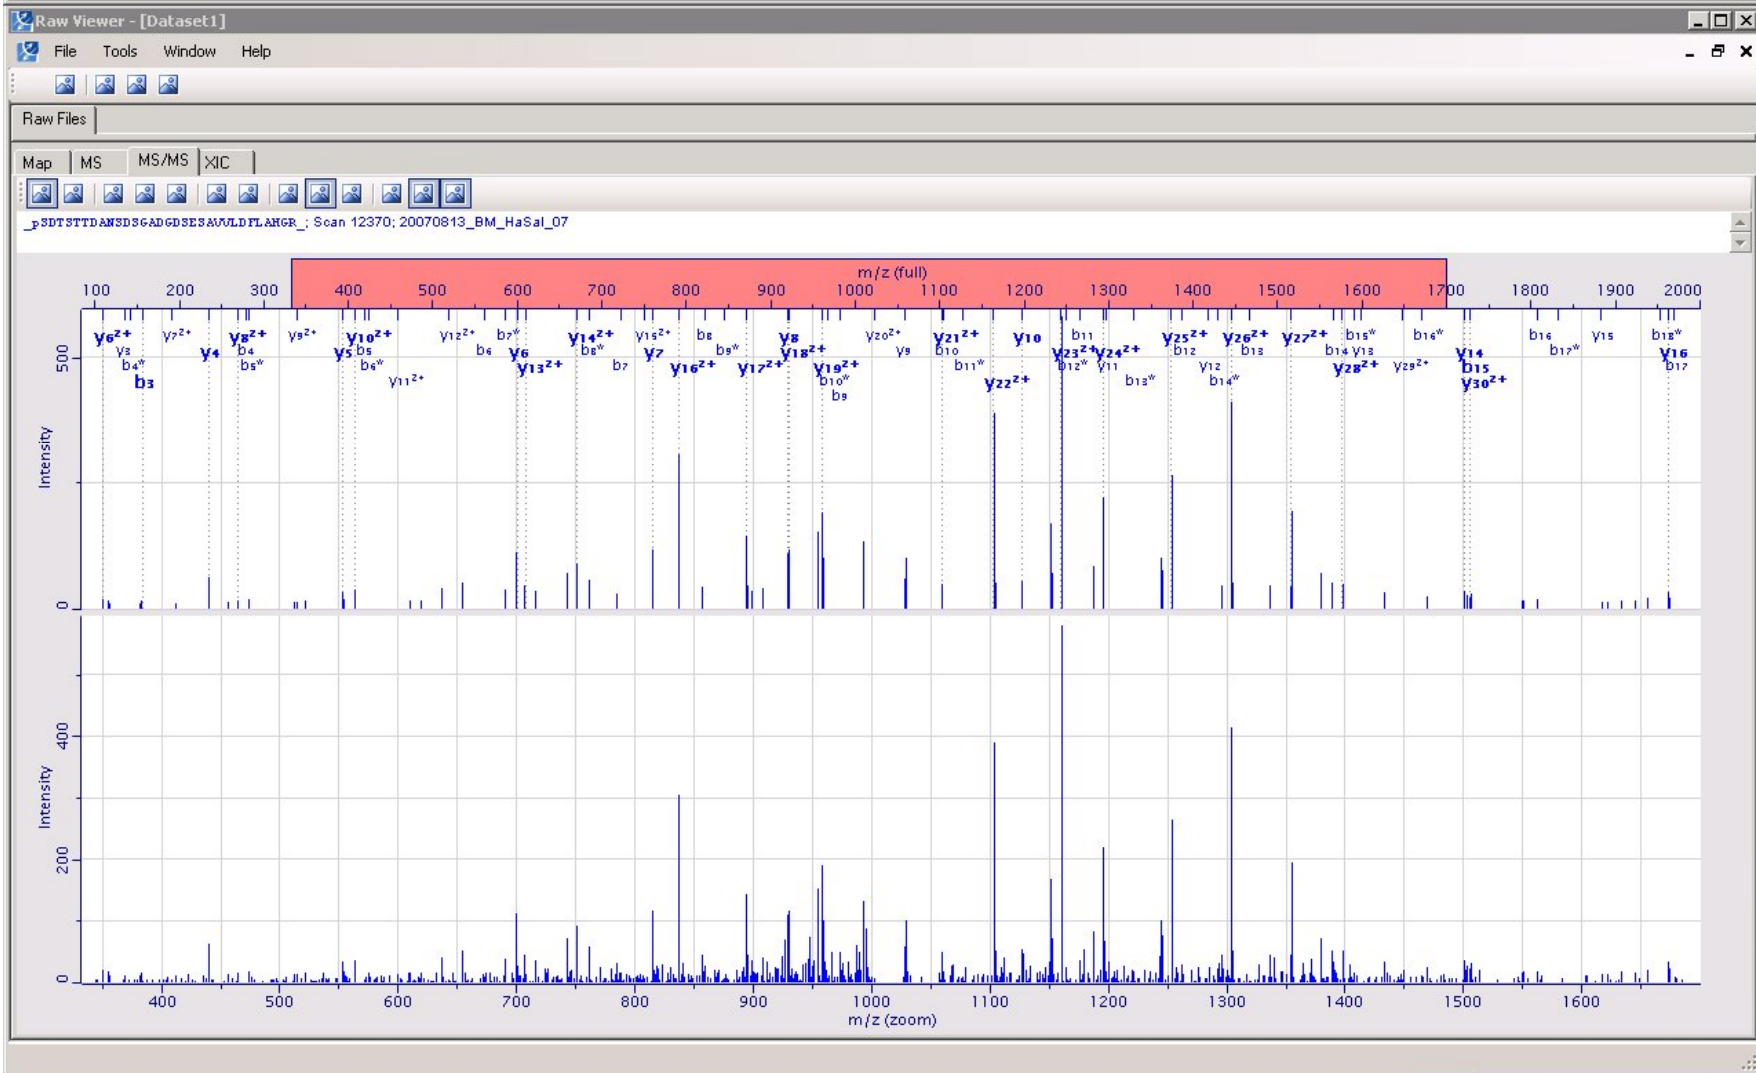

| Result Explorer                                                                                  |                             |               |           |                  |                      |                |          |                 |                  |              |        |                   |               |                 |         |         |         |
|--------------------------------------------------------------------------------------------------|-----------------------------|---------------|-----------|------------------|----------------------|----------------|----------|-----------------|------------------|--------------|--------|-------------------|---------------|-----------------|---------|---------|---------|
| Summary   Identifications   Modifications   All Peptides   MS Scans   MS/MS Scans   All Proteins |                             |               |           |                  |                      |                |          |                 |                  |              |        |                   |               |                 |         |         |         |
| Protein Groups   Peptides   Modification-Specific Peptides   Evidence   MS/MS                    |                             |               |           |                  |                      |                |          |                 |                  |              |        |                   |               |                 |         |         |         |
|                                                                                                  | Sequence                    | Modifications | Mass      | Mass Error [ppm] | Mass Fractional Part | Protein Groups | Proteins | Unique (Groups) | Unique (Protein) | Oxidatic (M) | phosph | N-Acety (Protein) | Slice Average | Slice Std. Dev. | Slice 1 | Slice 2 | Slice 3 |
| ▶ 29                                                                                             | SDHAEHAADAADTDAPEGDDAGGD... | phospho(STY)  | 4232.6548 | -0.45852         | 0.65481263           | 155            | OE1742R  | yes             | yes              | 0            | 1      | 0                 | 7             | 0               |         |         |         |

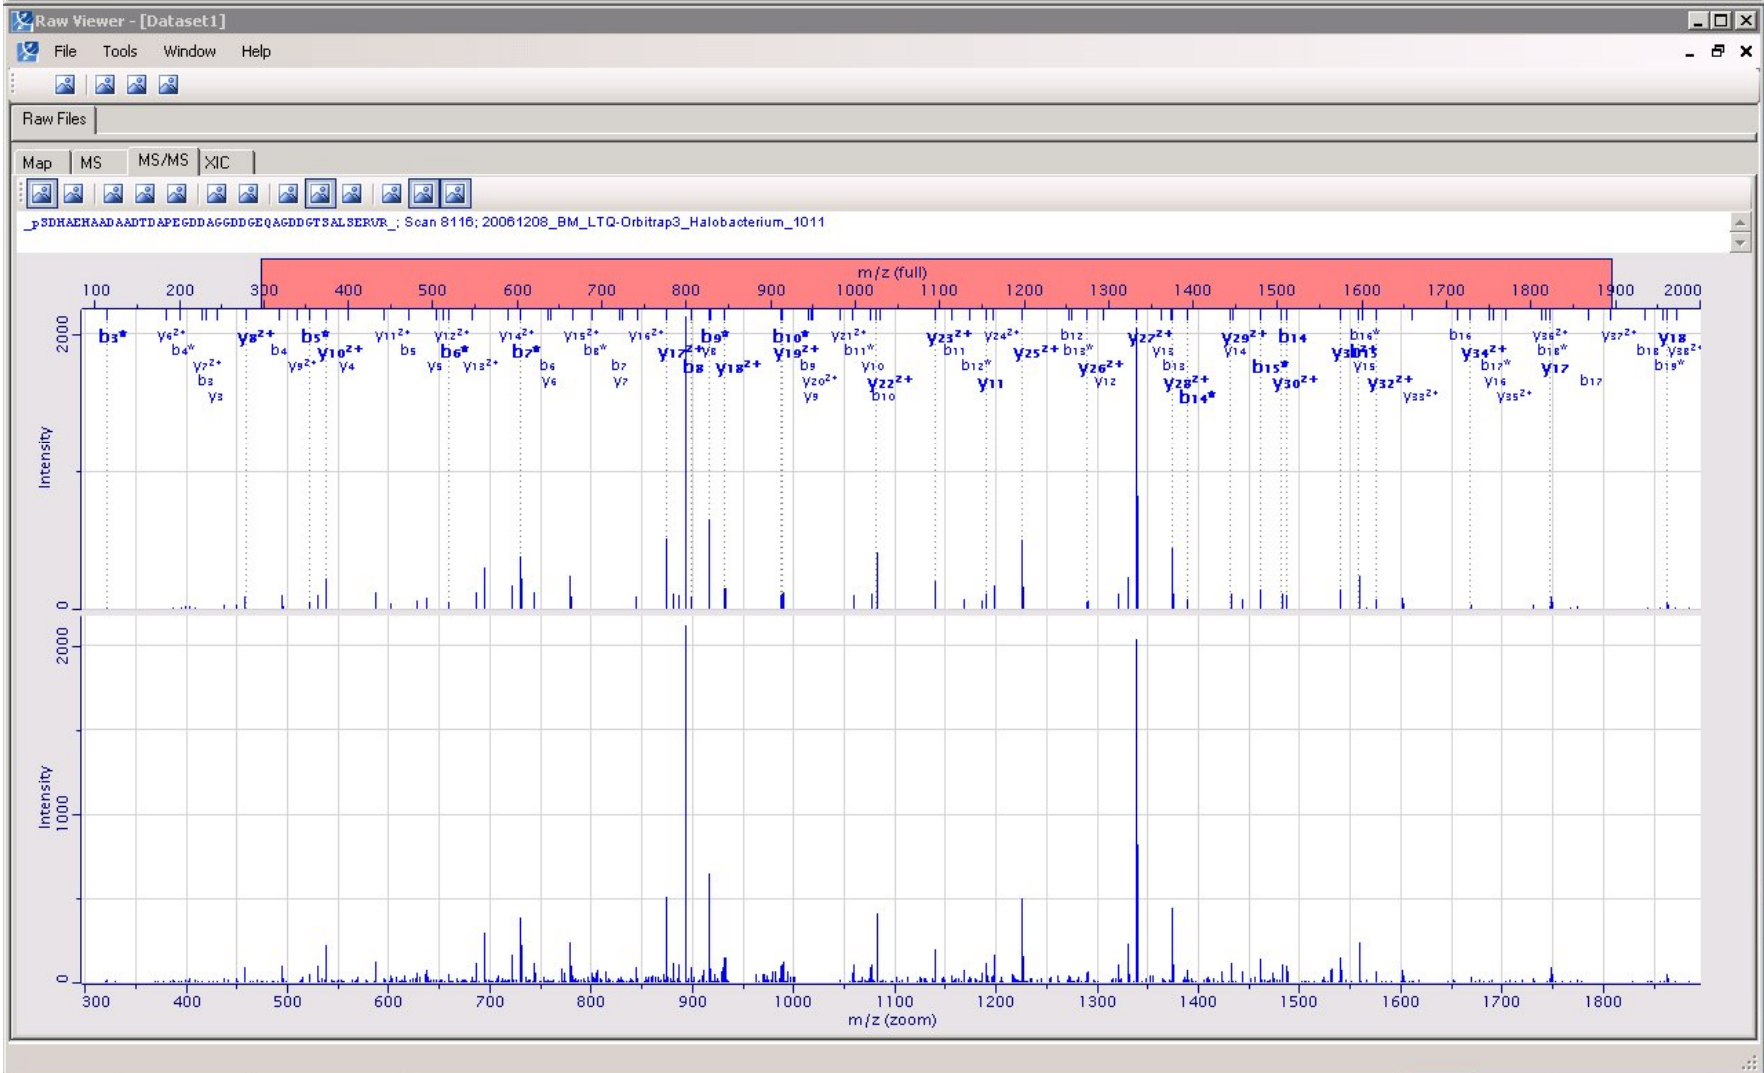

Result Explorer

Summary | Identifications | Modifications | All Peptides | MS Scans | MS/MS Scans | All Proteins

Protein Groups | Peptides | Modification-Specific Peptides | Evidence | MS/MS

|      | Sequence         | Modifications | Mass      | Mass Error [ppm] | Mass Fractional Part | Protein Groups | Proteins | Unique (Groups) | Unique (Protein) | Oxidatic (M) | phosph | N-Acety (Protein) | Slice Average | Slice Std. Dev. | Slice 1 | Slice 2 | Slice 3 |
|------|------------------|---------------|-----------|------------------|----------------------|----------------|----------|-----------------|------------------|--------------|--------|-------------------|---------------|-----------------|---------|---------|---------|
| ▶ 30 | SDDHDSSTEPGLDAHR | phospho(STY)  | 1730.6533 | -0.15136         | 0.65333689           | 319            | OE2359F  | yes             | yes              | 0            | 1      | 0                 | 1             | 0               | 1       |         |         |

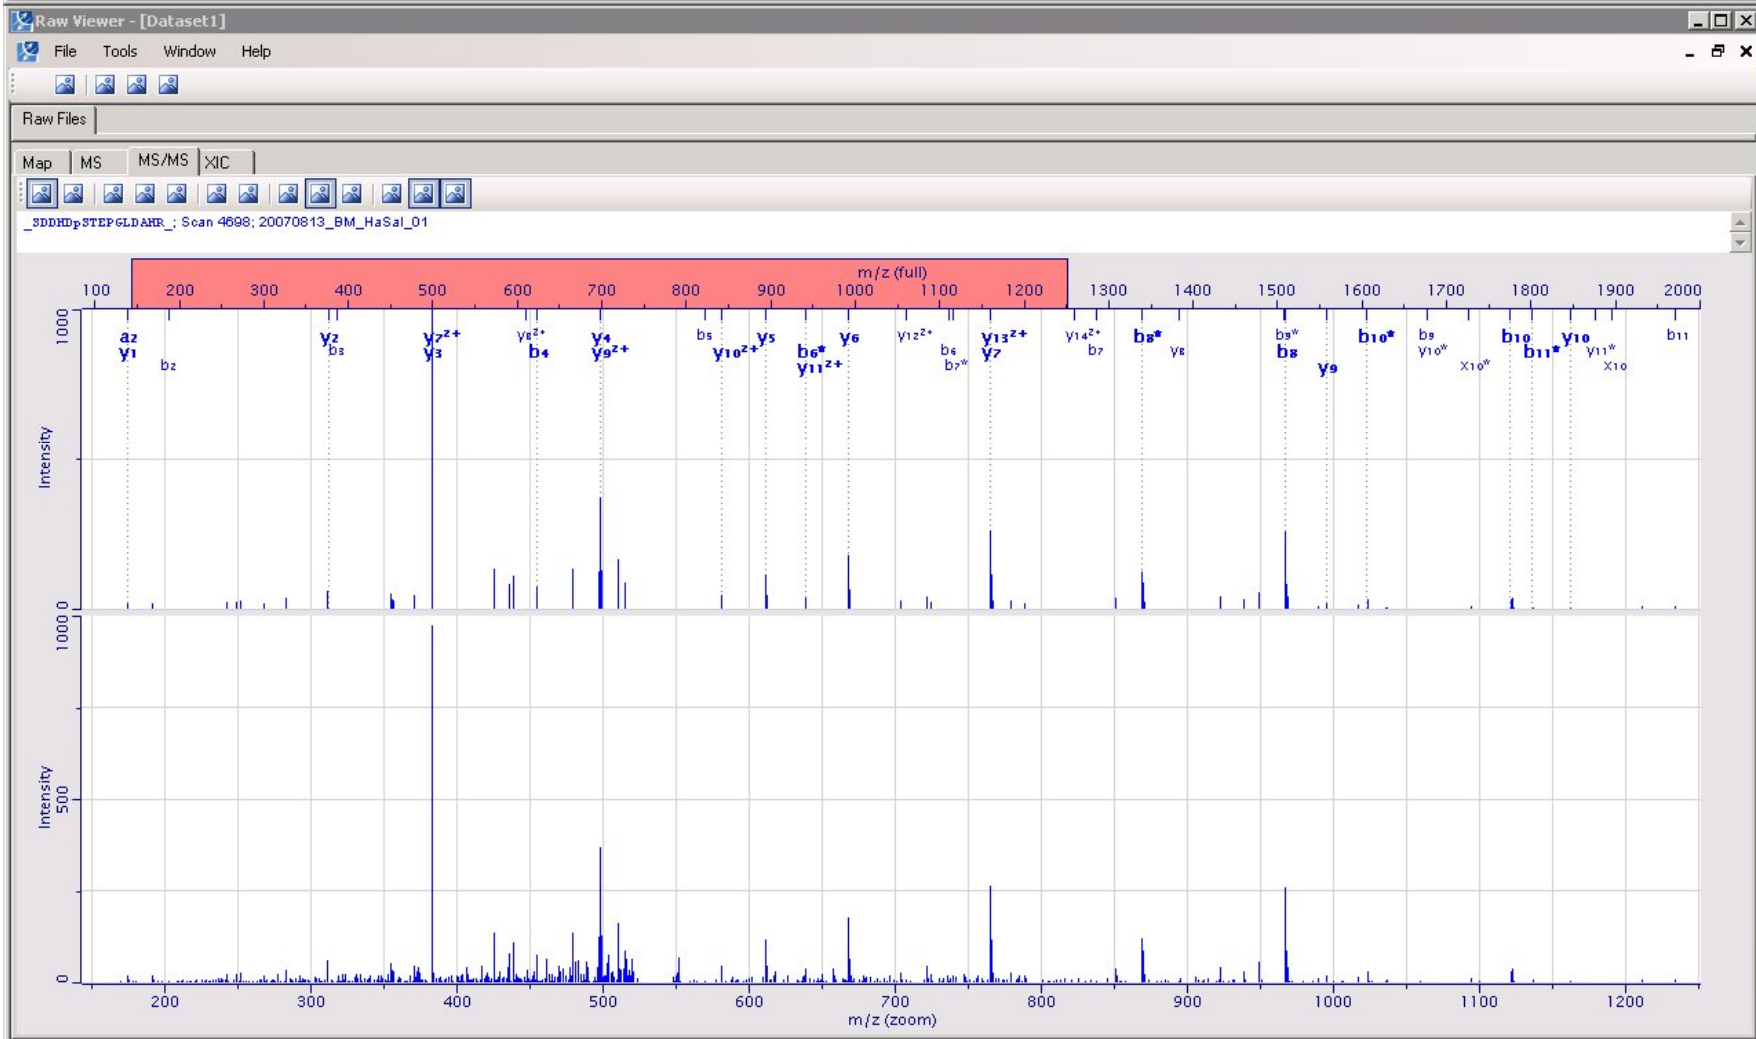

| Result Explorer                                                                                  |                   |               |           |                  |                      |                |          |                 |                  |              |        |                   |               |                 |         |         |         |
|--------------------------------------------------------------------------------------------------|-------------------|---------------|-----------|------------------|----------------------|----------------|----------|-----------------|------------------|--------------|--------|-------------------|---------------|-----------------|---------|---------|---------|
| Summary   Identifications   Modifications   All Peptides   MS Scans   MS/MS Scans   All Proteins |                   |               |           |                  |                      |                |          |                 |                  |              |        |                   |               |                 |         |         |         |
| Protein Groups   Peptides   Modification-Specific Peptides   Evidence   MS/MS                    |                   |               |           |                  |                      |                |          |                 |                  |              |        |                   |               |                 |         |         |         |
|                                                                                                  | Sequence          | Modifications | Mass      | Mass Error [ppm] | Mass Fractional Part | Protein Groups | Proteins | Unique (Groups) | Unique (Protein) | Oxidatic (M) | phosph | N-Acety (Protein) | Slice Average | Slice Std. Dev. | Slice 1 | Slice 2 | Slice 3 |
| ▶ 31                                                                                             | SASERDTASGNGIHITK | phospho(STY)  | 1822.8211 | 0.14985          | 0.82107092           | 301            | OE2296F  | yes             | yes              | 0            | 1      | 0                 | 2             | 0               |         | 2       |         |

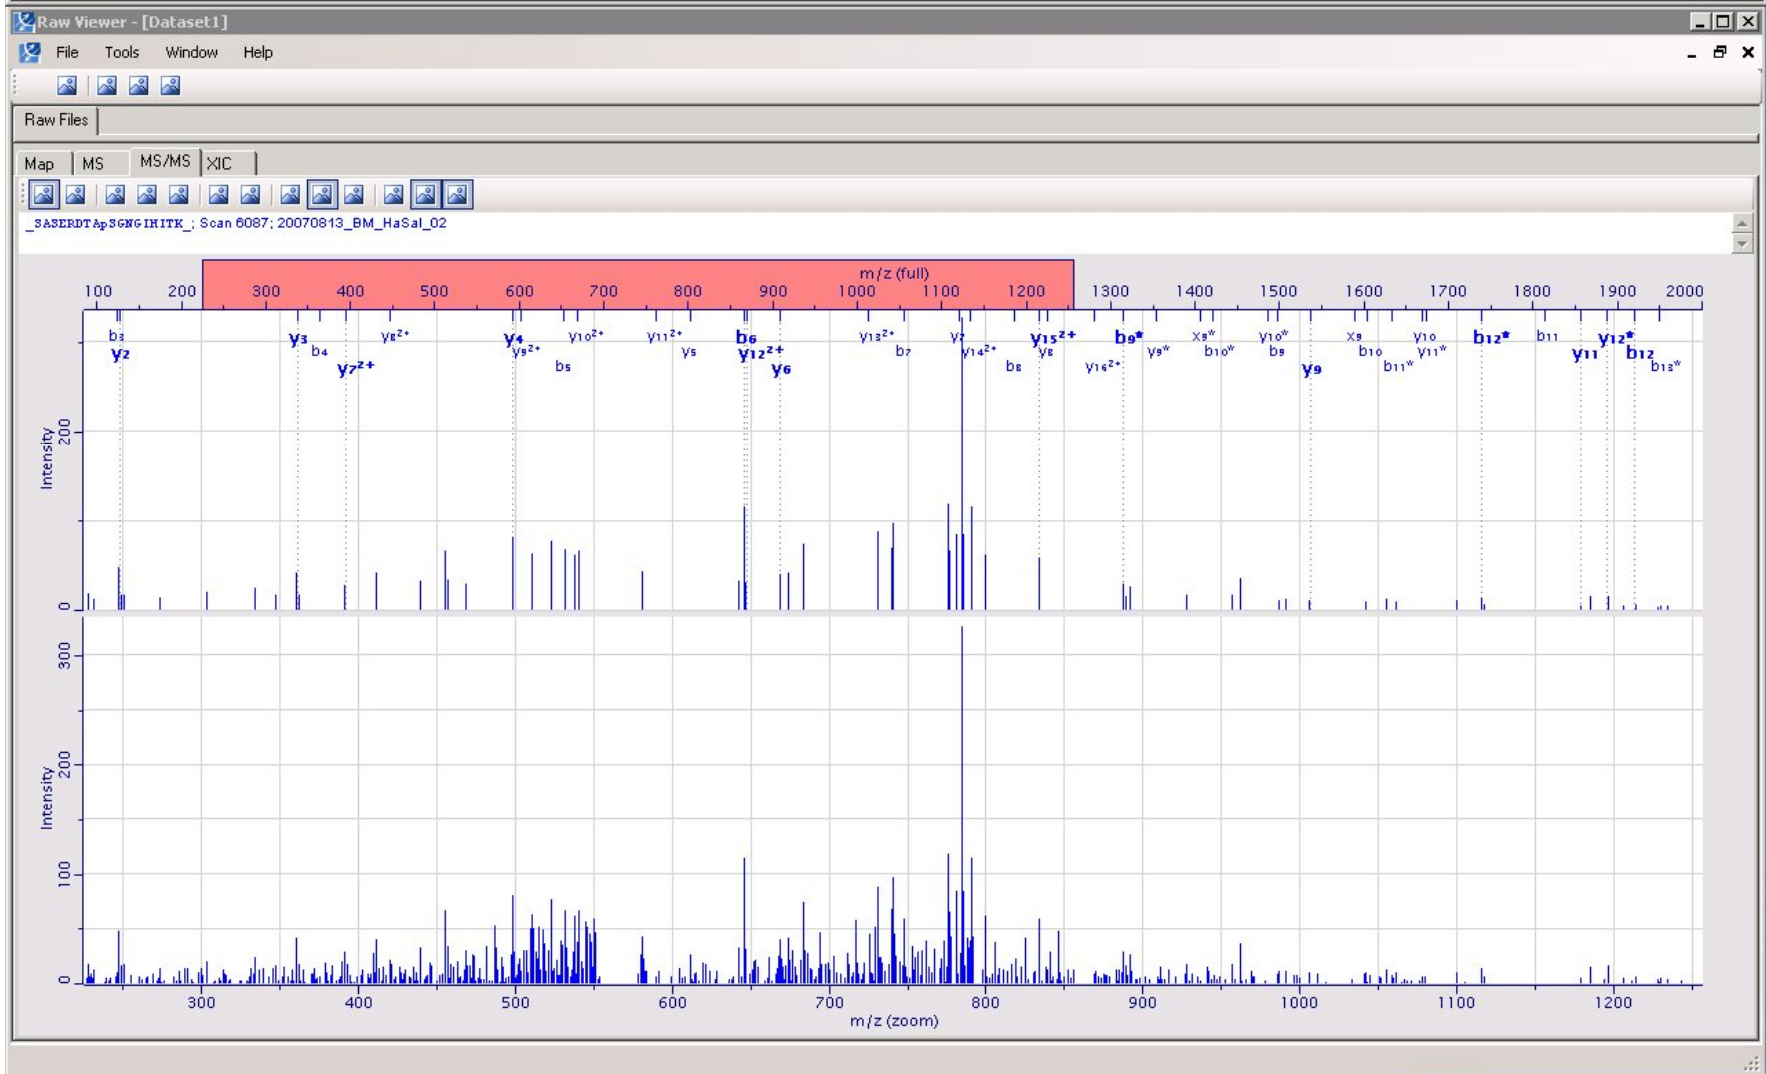

**Result Explorer**

Summary | Identifications | Modifications | All Peptides | MS Scans | MS/MS Scans | All Proteins

Protein Groups | Peptides | **Modification-Specific Peptides** | Evidence | MS/MS

|      | Sequence            | Modifications             | Mass      | Mass Error [ppm] | Mass Fractional Part | Protein Groups | Proteins | Unique (Groups) | Unique (Protein) | Oxidatic (M) | phosph | N-Acety (Protein) | Slice Average | Slice Std. Dev. | Slice 1 | Slice 2 | Slice 3 |
|------|---------------------|---------------------------|-----------|------------------|----------------------|----------------|----------|-----------------|------------------|--------------|--------|-------------------|---------------|-----------------|---------|---------|---------|
| ▶ 32 | SASEFDDRFVTVPLRDVTK | N-Acetyl (Protein),pho... | 2303.0835 | 0.40784          | 0.08350348           | 919            | OE4459R  | yes             | yes              | 0            | 1      | 1                 | 2             | 0               |         | 1       |         |

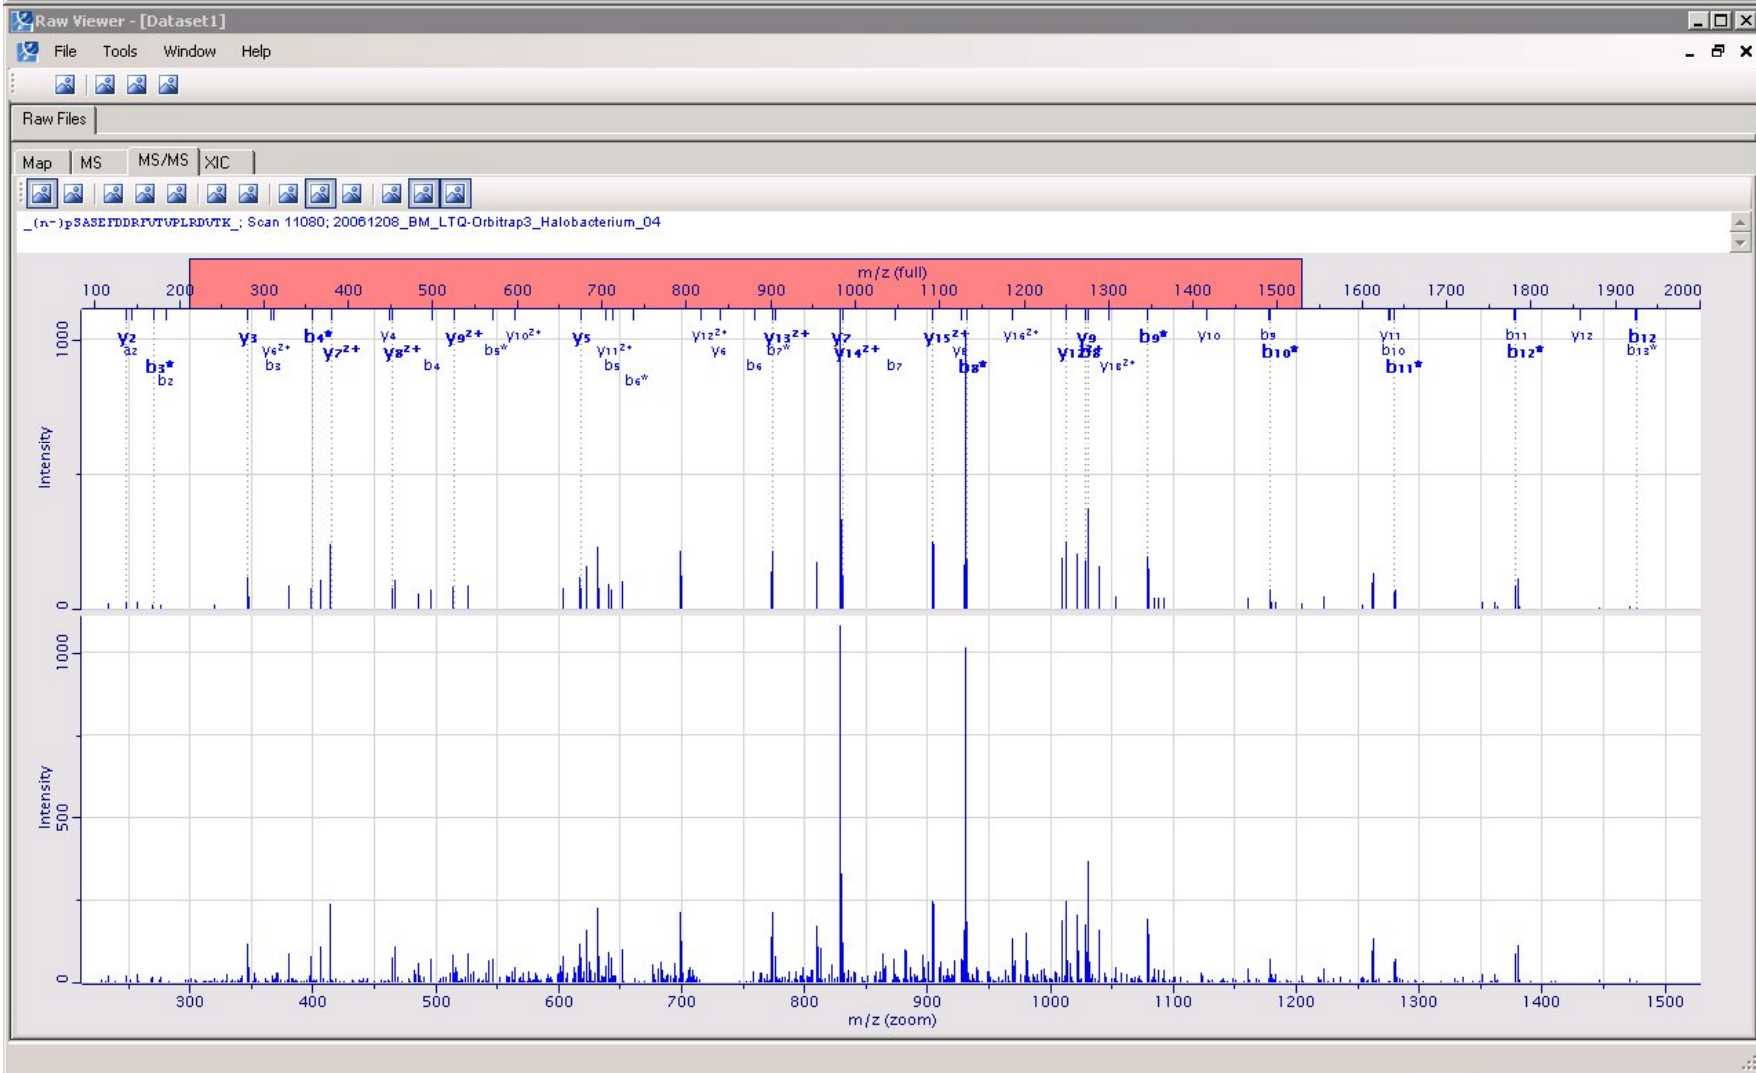



| Result Explorer                                                                                  |                      |               |           |                  |                      |                |          |                 |                  |              |        |                   |               |                 |         |         |         |
|--------------------------------------------------------------------------------------------------|----------------------|---------------|-----------|------------------|----------------------|----------------|----------|-----------------|------------------|--------------|--------|-------------------|---------------|-----------------|---------|---------|---------|
| Summary   Identifications   Modifications   All Peptides   MS Scans   MS/MS Scans   All Proteins |                      |               |           |                  |                      |                |          |                 |                  |              |        |                   |               |                 |         |         |         |
| Protein Groups   Peptides   Modification-Specific Peptides   Evidence   MS/MS                    |                      |               |           |                  |                      |                |          |                 |                  |              |        |                   |               |                 |         |         |         |
|                                                                                                  | Sequence             | Modifications | Mass      | Mass Error [ppm] | Mass Fractional Part | Protein Groups | Proteins | Unique (Groups) | Unique (Protein) | Oxidatic (M) | phosph | N-Acety (Protein) | Slice Average | Slice Std. Dev. | Slice 1 | Slice 2 | Slice 3 |
| ▶ 33                                                                                             | SAESDADDIVAEAEEDREQR | phospho(STY)  | 2313.9234 | -0.3212          | 0.92342332           | 786            | OE3992R  | yes             | yes              | 0            | 1      | 0                 | 4             | 2               |         | 1       |         |

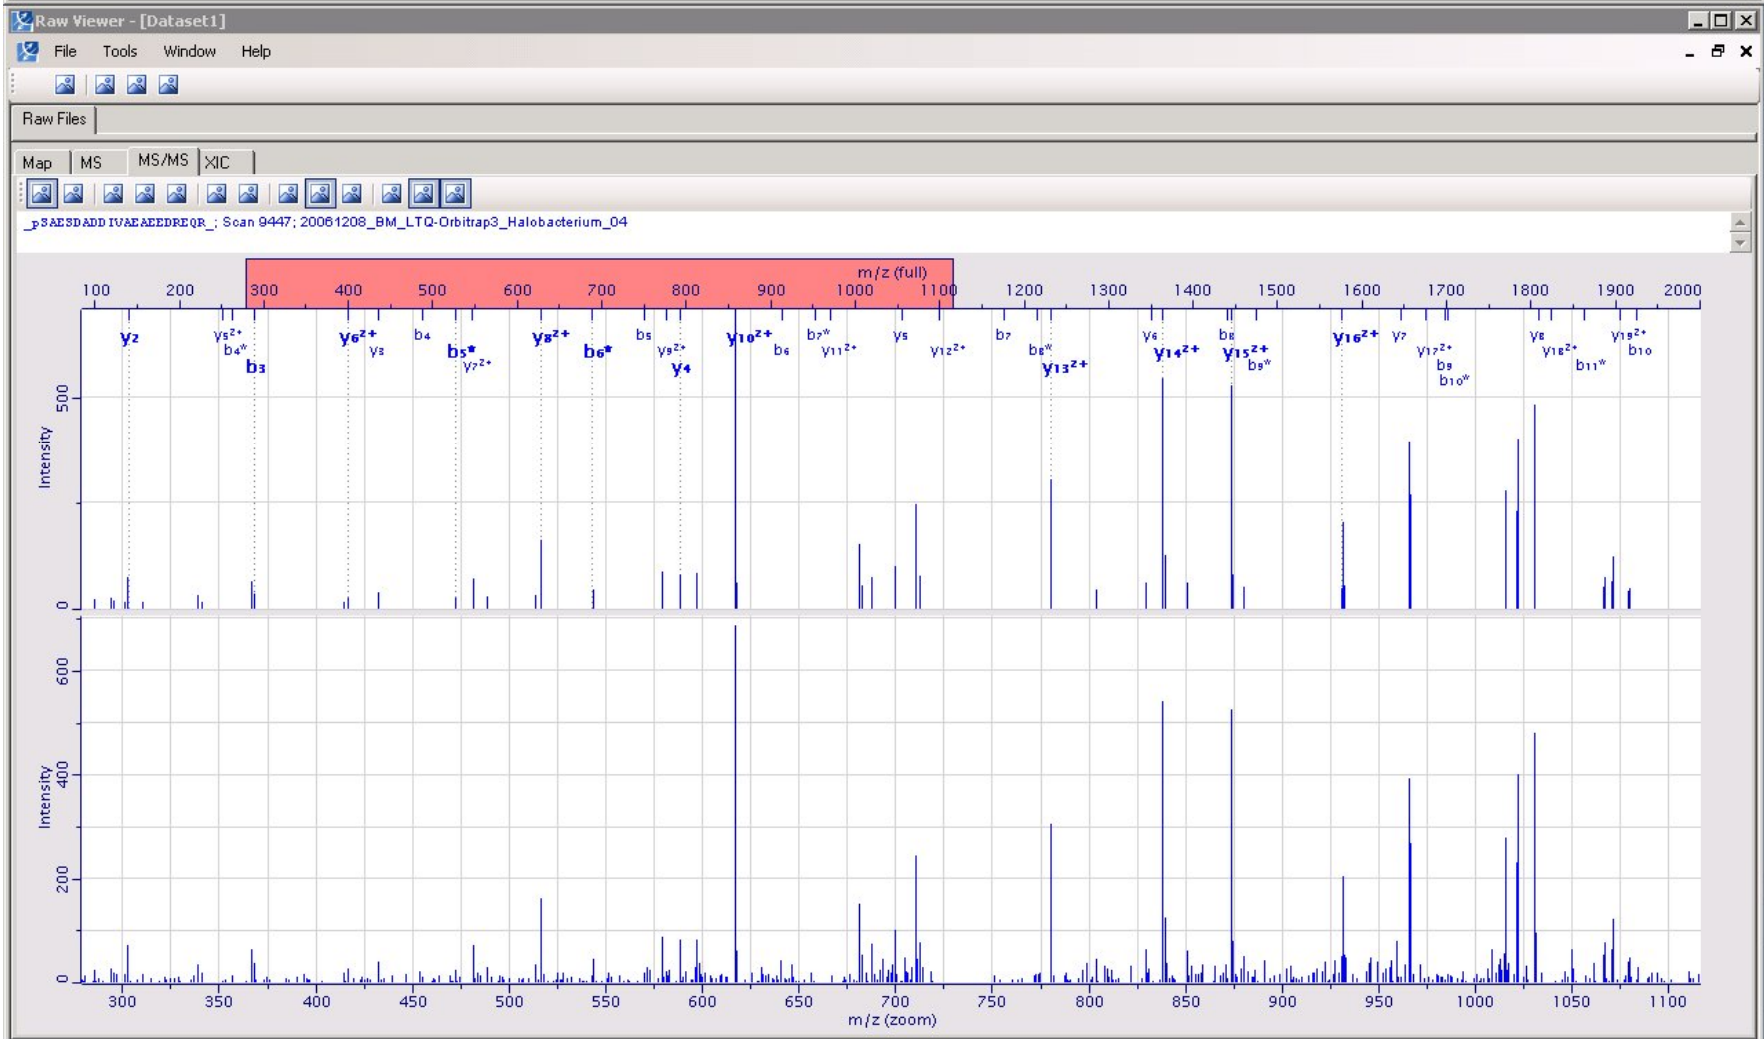

Result Explorer

Summary | Identifications | Modifications | All Peptides | MS Scans | MS/MS Scans | All Proteins

Protein Groups | Peptides | **Modification-Specific Peptides** | Evidence | MS/MS

|      | Sequence    | Modifications | Mass      | Mass Error [ppm] | Mass Fractional Part | Protein Groups | Proteins | Unique (Groups) | Unique (Protein) | Oxidatic (M) | phosph | N-Acety (Protein) | Slice Average | Slice Std. Dev. | Slice 1 | Slice 2 | Slice 3 |
|------|-------------|---------------|-----------|------------------|----------------------|----------------|----------|-----------------|------------------|--------------|--------|-------------------|---------------|-----------------|---------|---------|---------|
| ▶ 34 | RNELNQLASSR | phospho(STY)  | 1366.6354 | 0.45679          | 0.6354424            | 109            | DE1584R  | yes             | yes              | 0            | 1      | 0                 | 3             | 0               |         |         | 1       |

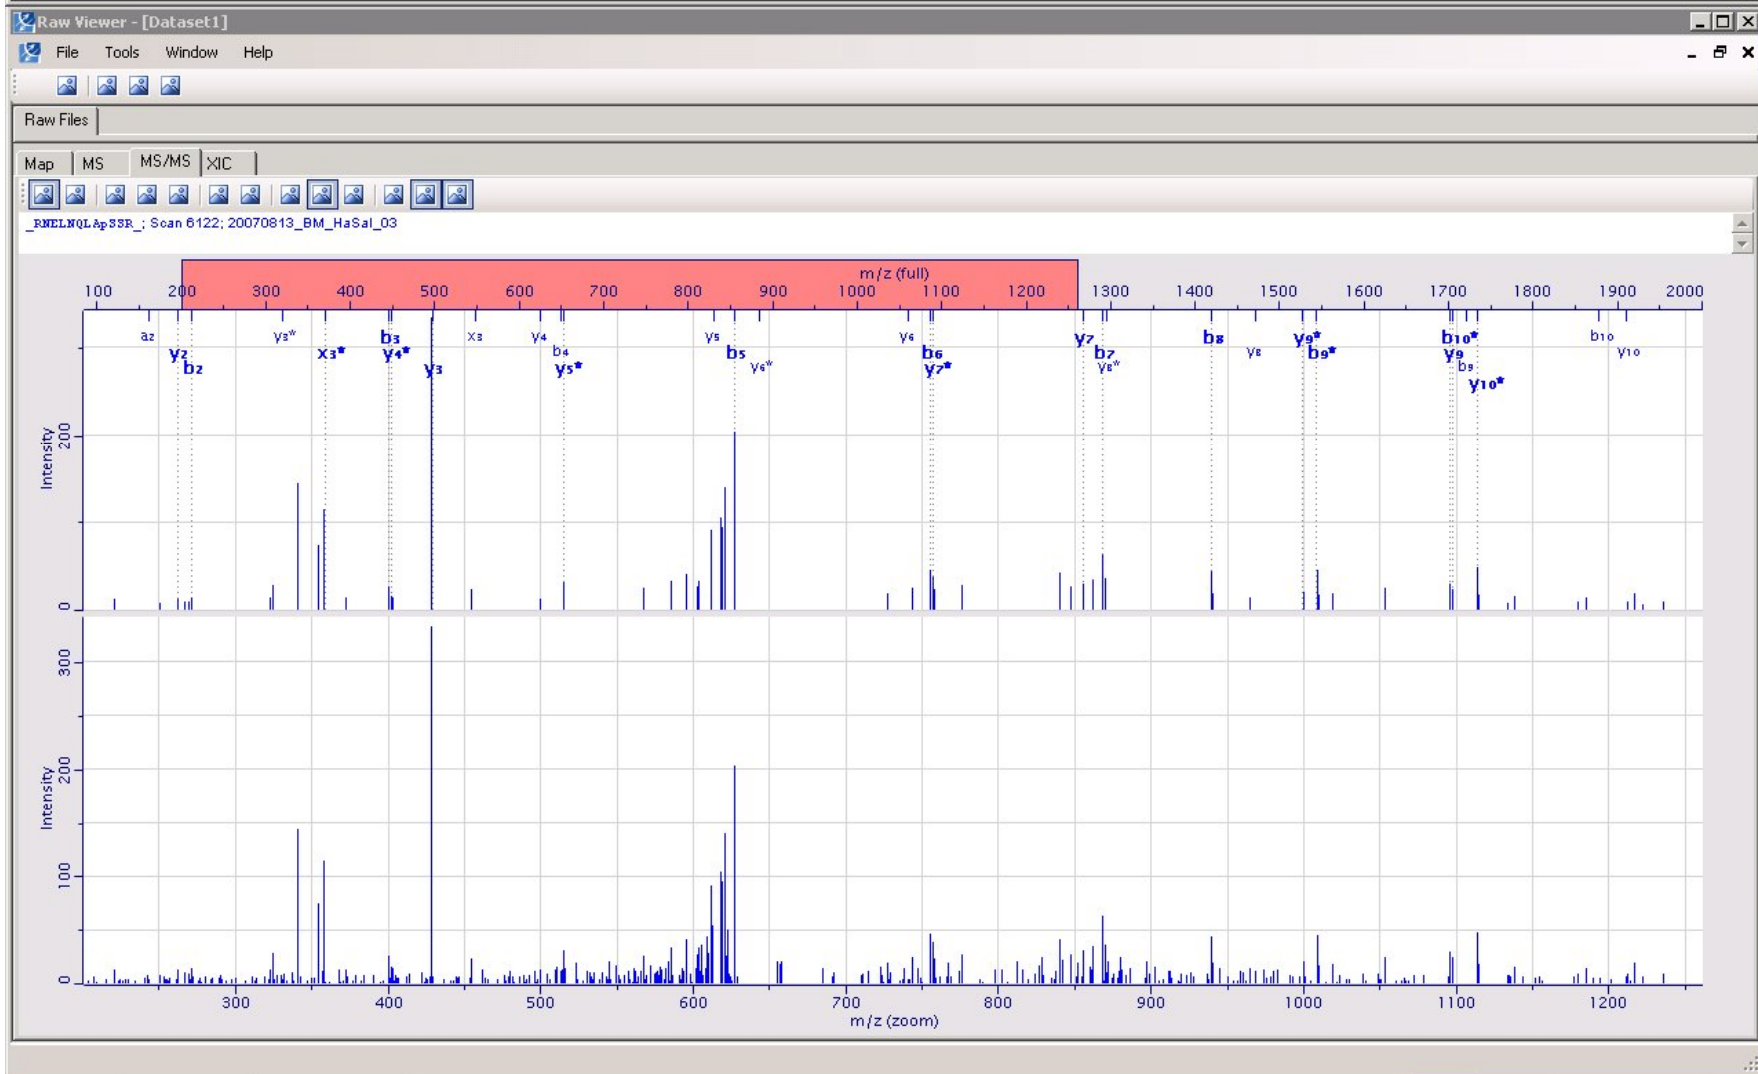

| Result Explorer                                                                                  |              |               |           |                  |                      |                |          |                 |                  |              |        |                   |               |                 |         |         |         |
|--------------------------------------------------------------------------------------------------|--------------|---------------|-----------|------------------|----------------------|----------------|----------|-----------------|------------------|--------------|--------|-------------------|---------------|-----------------|---------|---------|---------|
| Summary   Identifications   Modifications   All Peptides   MS Scans   MS/MS Scans   All Proteins |              |               |           |                  |                      |                |          |                 |                  |              |        |                   |               |                 |         |         |         |
| Protein Groups   Peptides   Modification-Specific Peptides   Evidence   MS/MS                    |              |               |           |                  |                      |                |          |                 |                  |              |        |                   |               |                 |         |         |         |
|                                                                                                  | Sequence     | Modifications | Mass      | Mass Error [ppm] | Mass Fractional Part | Protein Groups | Proteins | Unique (Groups) | Unique (Protein) | Oxidatic (M) | phosph | N-Acety (Protein) | Slice Average | Slice Std. Dev. | Slice 1 | Slice 2 | Slice 3 |
| ▶ 35                                                                                             | RLNTEVWASGPK | phospho(STY)  | 1349.6704 | 0.54555          | 0.67043093           | 697            | OE3691F  | yes             | yes              | 0            | 1      | 0                 | 4             | 0               |         |         |         |

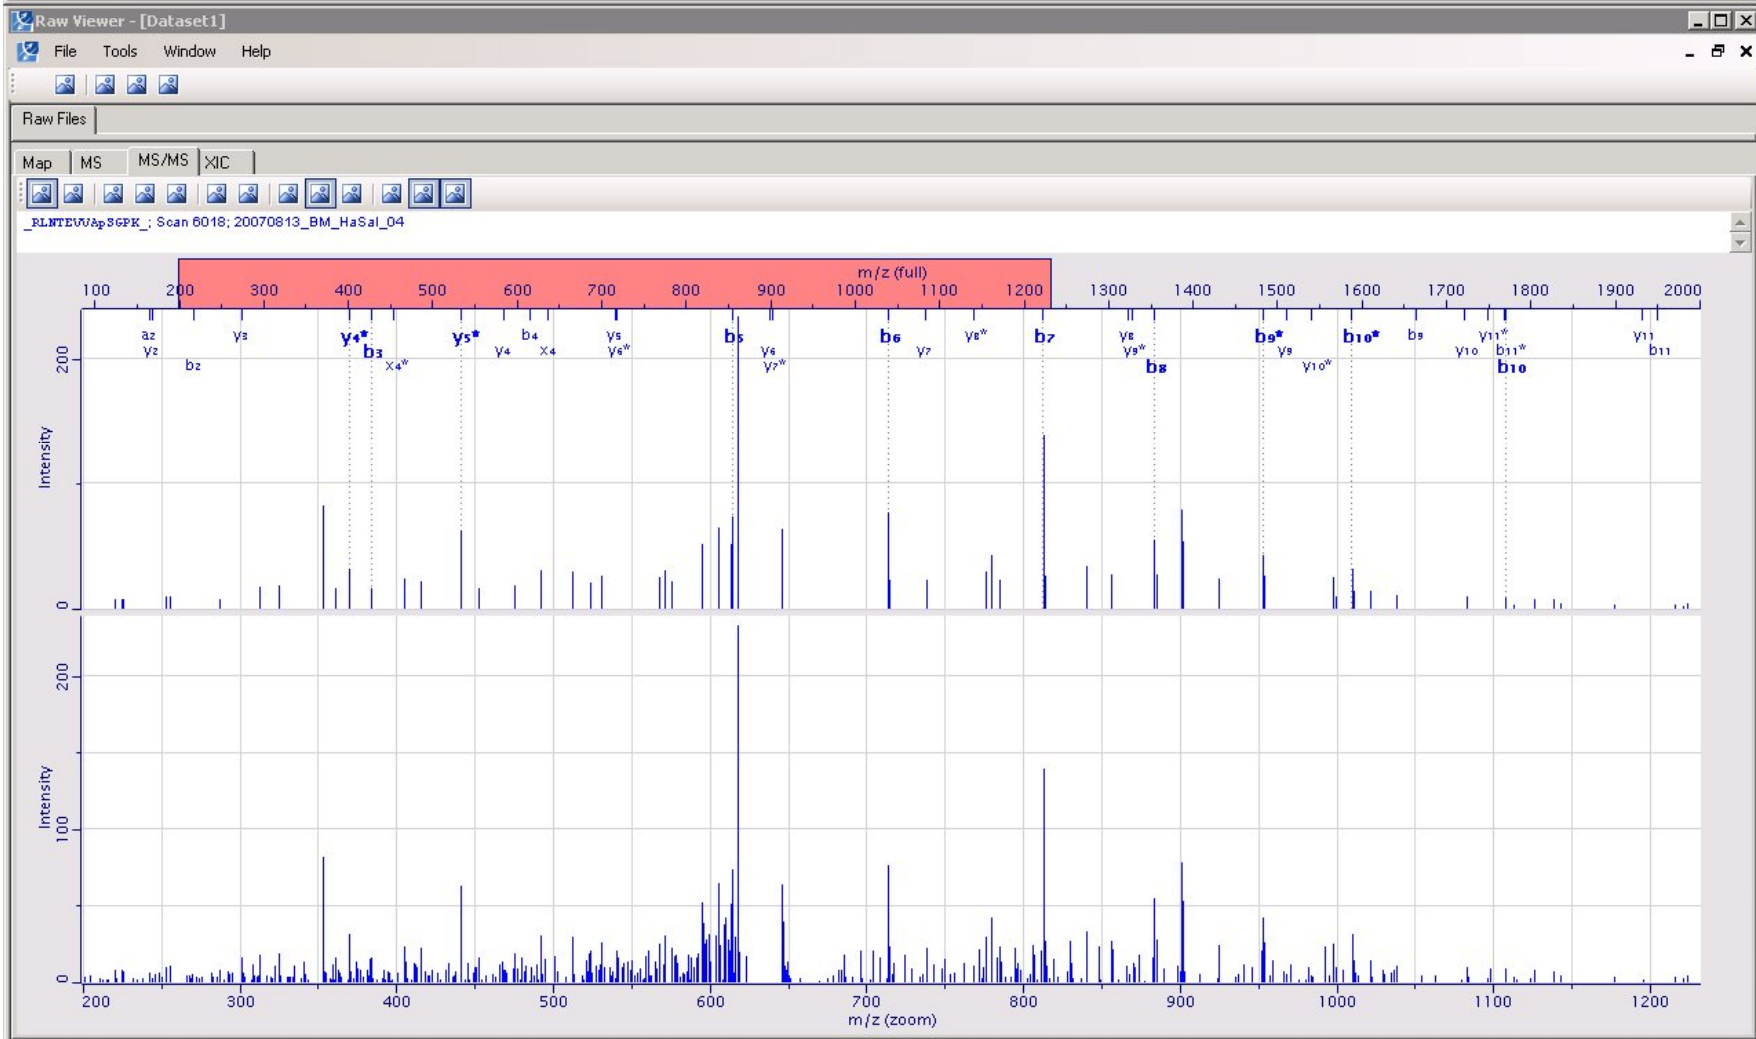

| Result Explorer                                                                                  |                   |                          |           |                  |                      |                |          |                 |                  |              |        |                   |               |                 |         |         |         |
|--------------------------------------------------------------------------------------------------|-------------------|--------------------------|-----------|------------------|----------------------|----------------|----------|-----------------|------------------|--------------|--------|-------------------|---------------|-----------------|---------|---------|---------|
| Summary   Identifications   Modifications   All Peptides   MS Scans   MS/MS Scans   All Proteins |                   |                          |           |                  |                      |                |          |                 |                  |              |        |                   |               |                 |         |         |         |
| Protein Groups   Peptides   Modification-Specific Peptides   Evidence   MS/MS                    |                   |                          |           |                  |                      |                |          |                 |                  |              |        |                   |               |                 |         |         |         |
|                                                                                                  | Sequence          | Modifications            | Mass      | Mass Error [ppm] | Mass Fractional Part | Protein Groups | Proteins | Unique (Groups) | Unique (Protein) | Oxidatic (M) | phosph | N-Acety (Protein) | Slice Average | Slice Std. Dev. | Slice 1 | Slice 2 | Slice 3 |
| ▶ 35                                                                                             | RLGGDIVDMGSDSSSVK | Oxidation (M), phosph... | 1316.8551 | 0.53124          | 0.85508394           | 1039           | OE5201F  | yes             | yes              | 1            | 1      | 0                 | 4             | 0               |         |         |         |

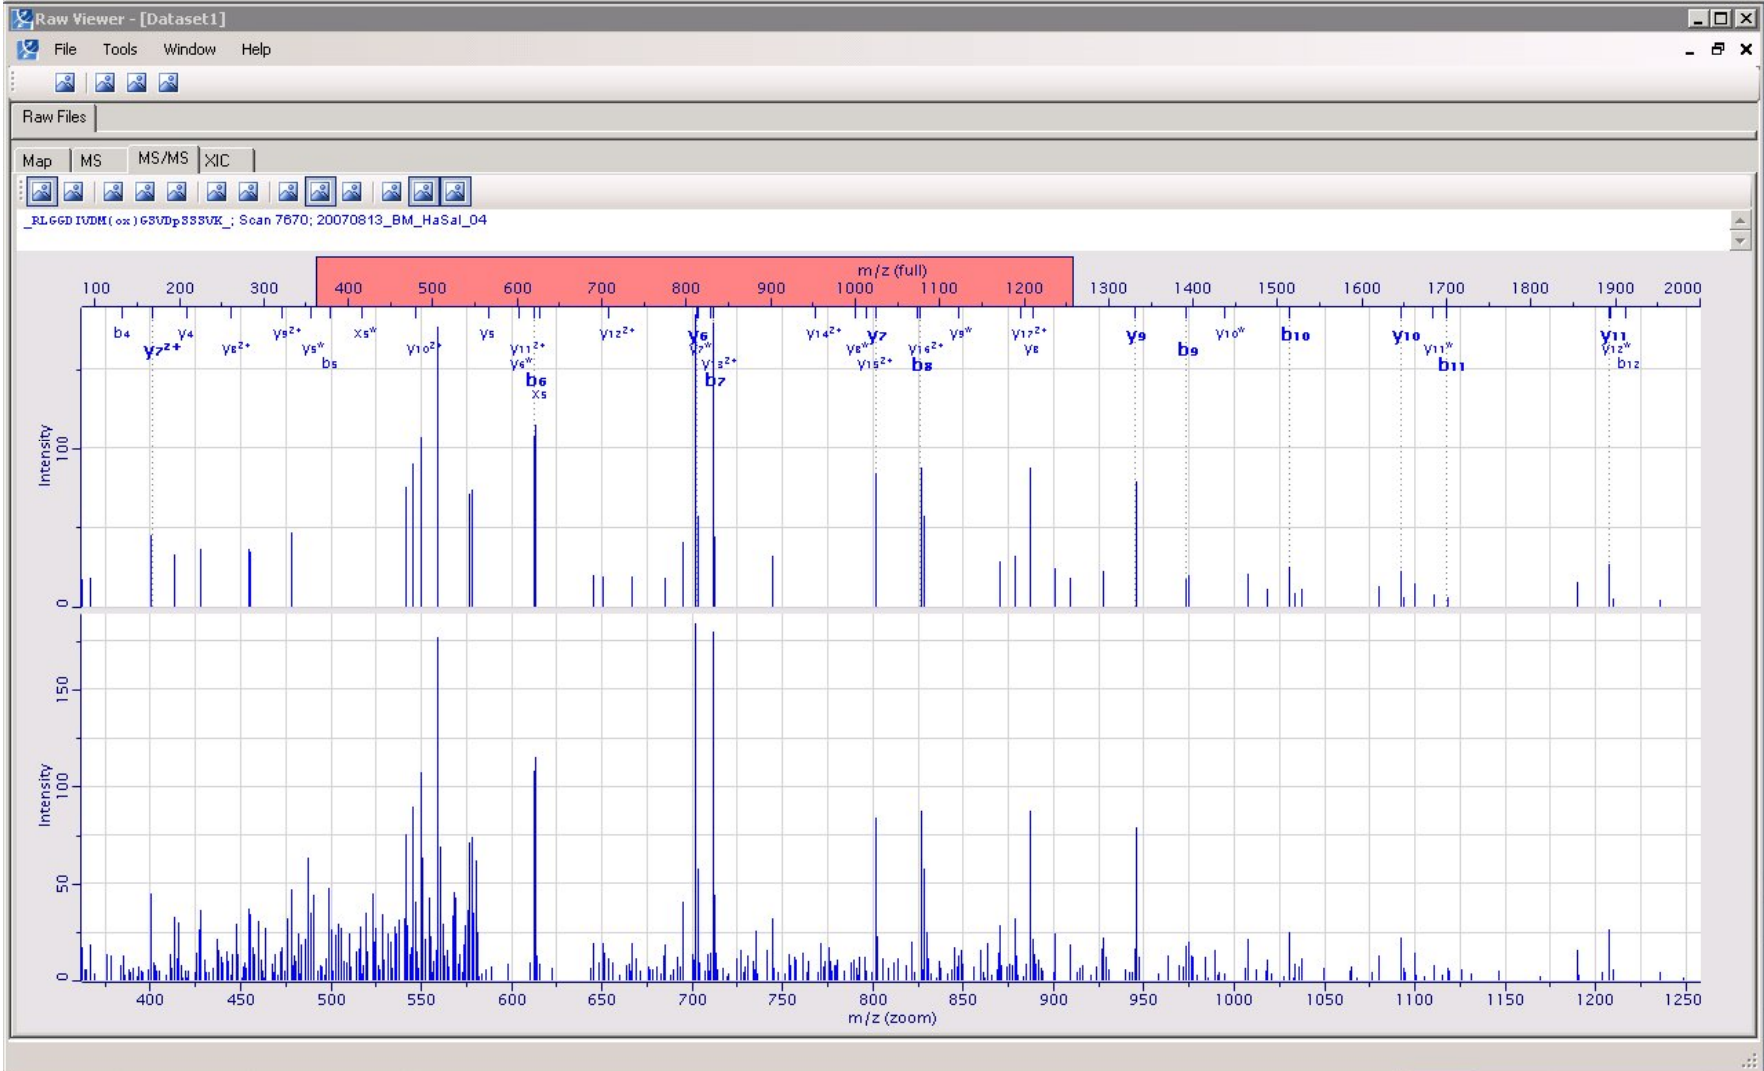

Result Explorer

Summary | Identifications | Modifications | All Peptides | MS Scans | MS/MS Scans | All Proteins

Protein Groups | Peptides | Modification-Specific Peptides | Evidence | MS/MS

|      | Sequence         | Modifications | Mass      | Mass Error [ppm] | Mass Fractional Part | Protein Groups | Proteins | Unique (Groups) | Unique (Protein) | Oxidatic (M) | phosph | N-Acety (Protein) | Slice Average | Slice Std. Dev. | Slice 1 | Slice 2 | Slice 3 |
|------|------------------|---------------|-----------|------------------|----------------------|----------------|----------|-----------------|------------------|--------------|--------|-------------------|---------------|-----------------|---------|---------|---------|
| ▶ 37 | RLDDVGESESEADRNR | phospho(STY)  | 1326.8069 | -0.093409        | 0.80687742           | 932            | DE4509F  | yes             | yes              | 0            | 1      | 0                 | 2.17          | 2.61            | 5       |         |         |

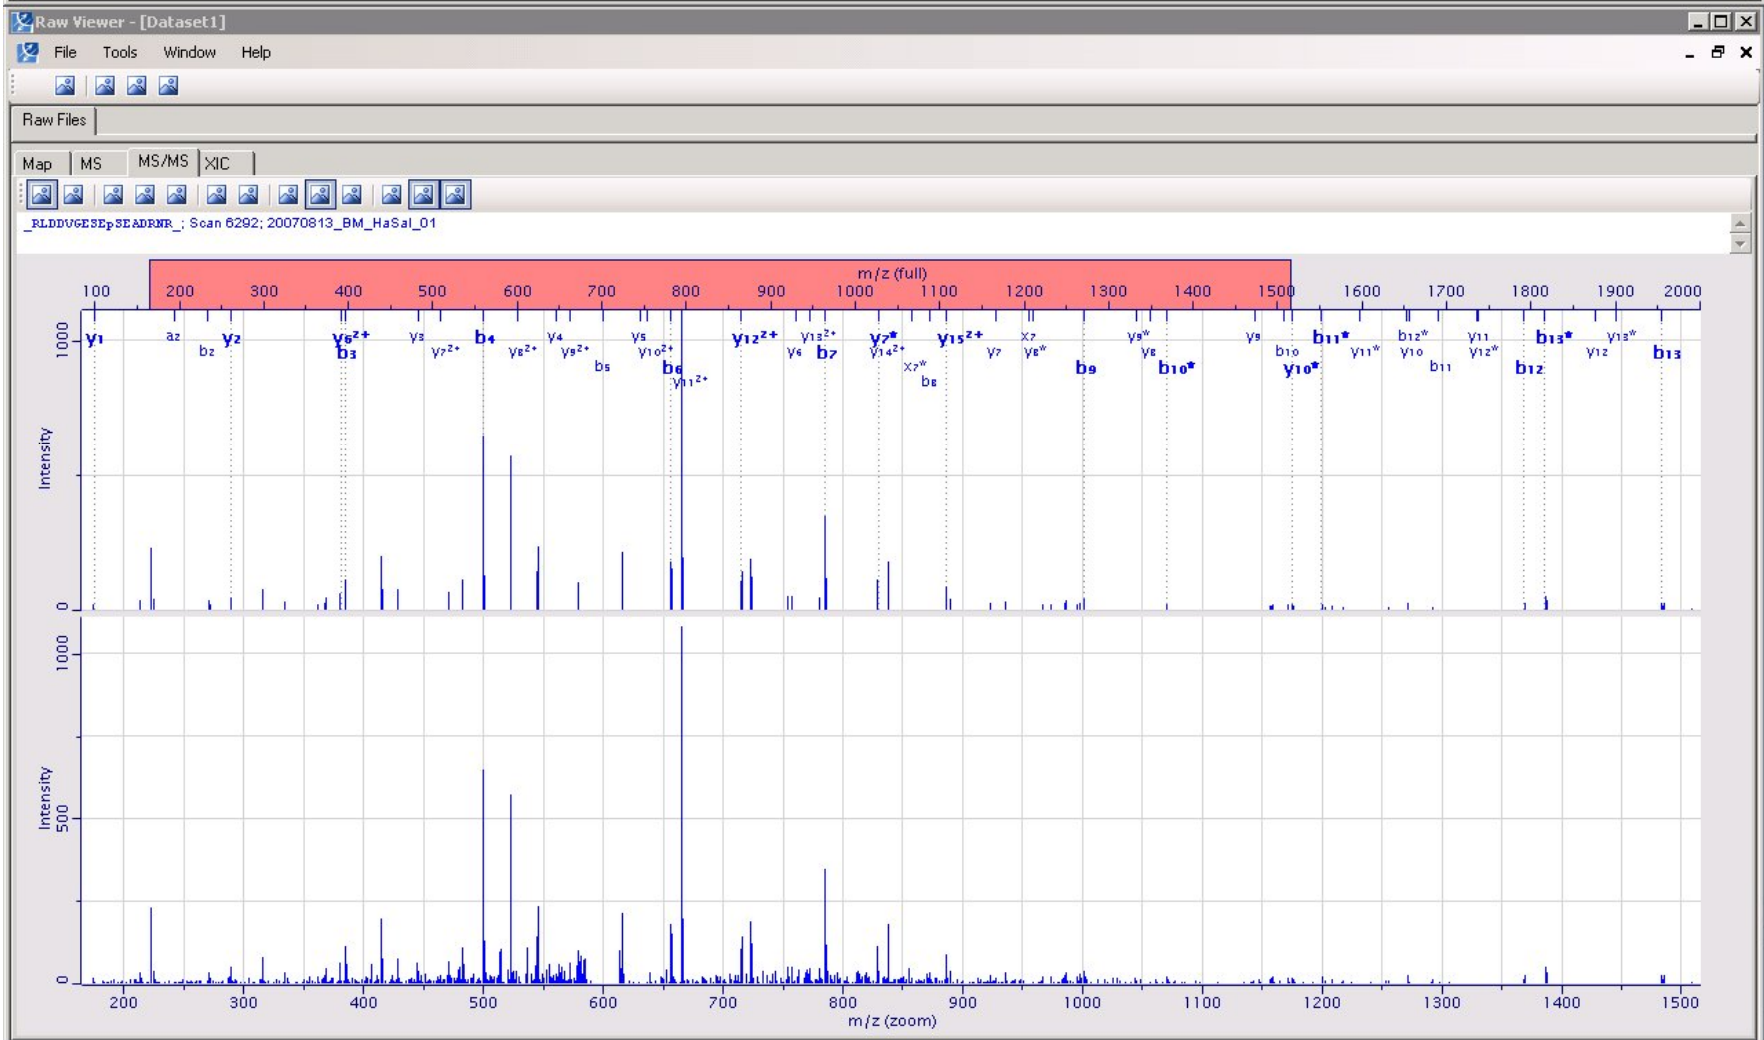

Result Explorer

Summary | Identifications | Modifications | All Peptides | MS Scans | MS/MS Scans | All Proteins

Protein Groups | Peptides | Modification-Specific Peptides | Evidence | MS/MS

|      | Sequence                    | Modifications | Mass      | Mass Error [ppm] | Mass Fractional Part | Protein Groups | Proteins | Unique (Groups) | Unique (Protein) | Oxidatic (M) | phosph | N-Acety (Protein) | Slice Average | Slice Std. Dev. | Slice 1 | Slice 2 | Slice 3 |
|------|-----------------------------|---------------|-----------|------------------|----------------------|----------------|----------|-----------------|------------------|--------------|--------|-------------------|---------------|-----------------|---------|---------|---------|
| ▶ 38 | RGSSGSDRPTADEPPEWSDVDEDA... | phospho(STY)  | 3181.3109 | -0.34283         | 0.31093954           | 269            | OE2165R  | yes             | yes              | 0            | 1      | 0                 | 3             | 0               |         |         | 1       |

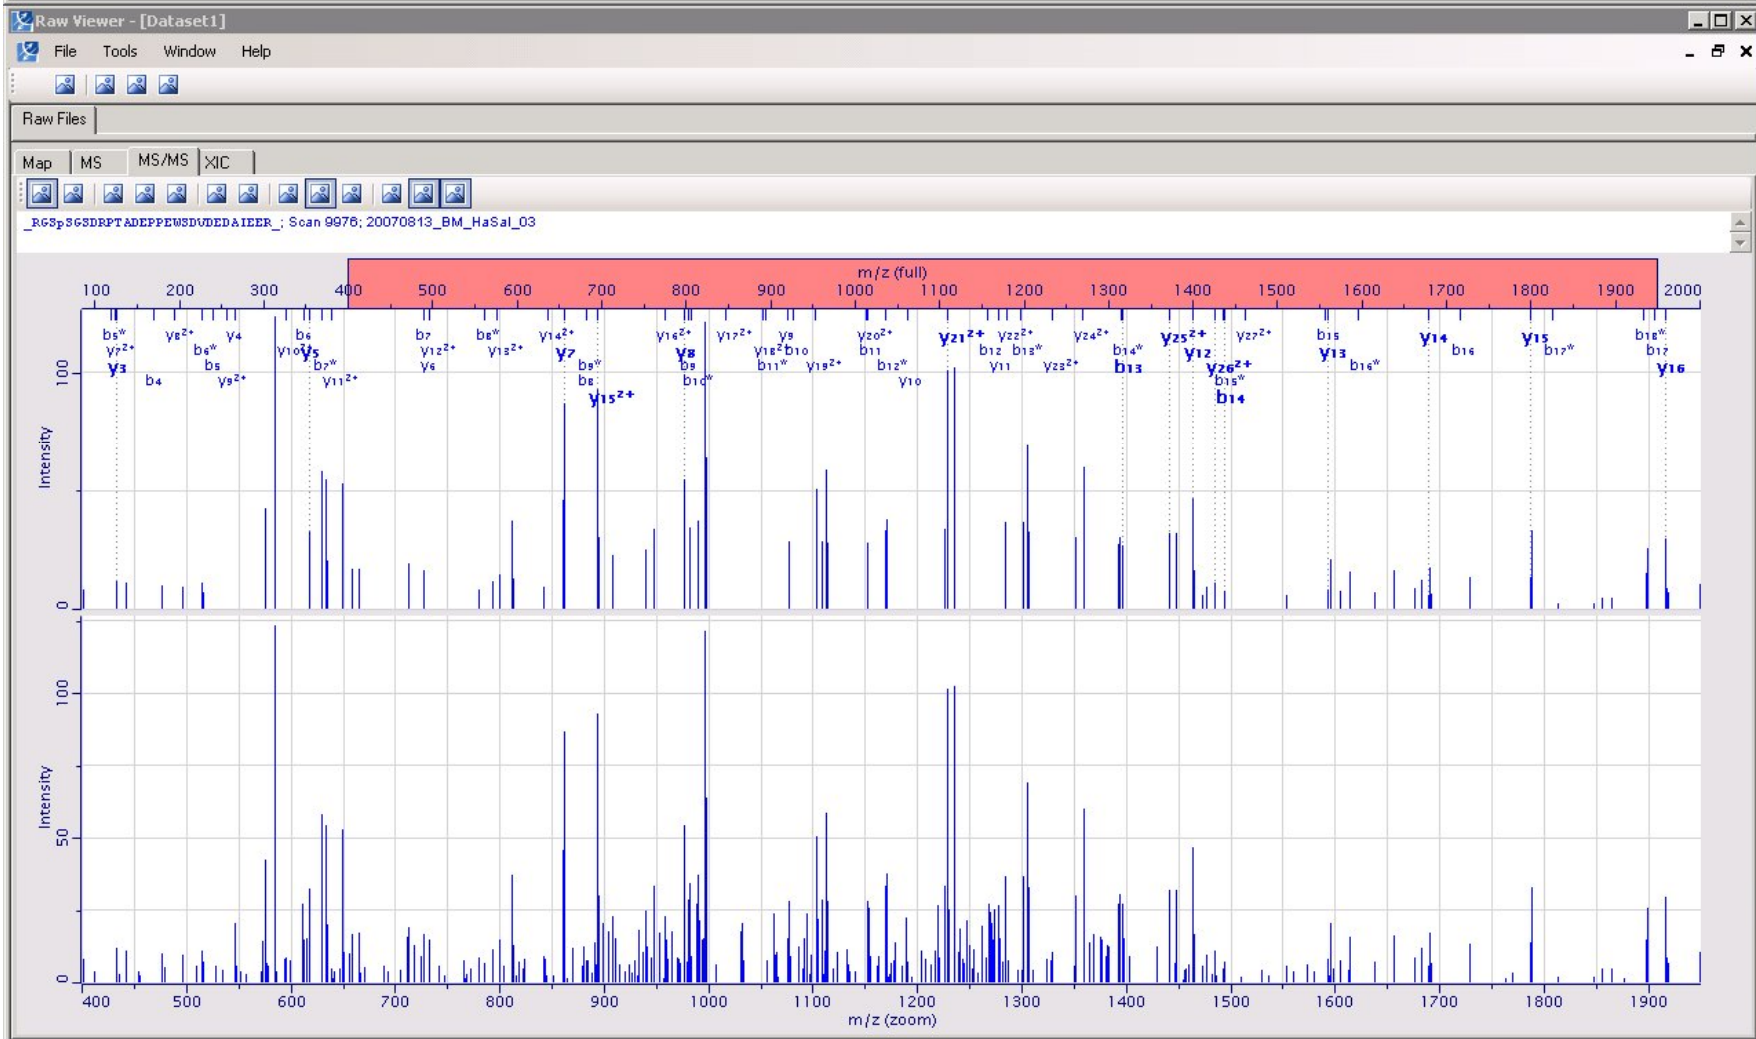

**Result Explorer**

Summary | Identifications | Modifications | All Peptides | MS Scans | MS/MS Scans | All Proteins

Protein Groups | Peptides | **Modification-Specific Peptides** | Evidence | MS/MS

|      | Sequence           | Modifications | Mass      | Mass Error [ppm] | Mass Fractional Part | Protein Groups | Proteins | Unique (Groups) | Unique (Protein) | Oxidatic (M) | phosph | N-Acety (Protein) | Slice Average | Slice Std. Dev. | Slice 1 | Slice 2 | Slice 3 |
|------|--------------------|---------------|-----------|------------------|----------------------|----------------|----------|-----------------|------------------|--------------|--------|-------------------|---------------|-----------------|---------|---------|---------|
| ▶ 39 | RGIQVTASHNPPSDNGIK | phospho(STY)  | 1969.9371 | -0.30885         | 0.93710373           | 313            | DE2318R  | yes             | yes              | 0            | 1      | 0                 | 4.29          | 2.37            |         | 3       | 1       |

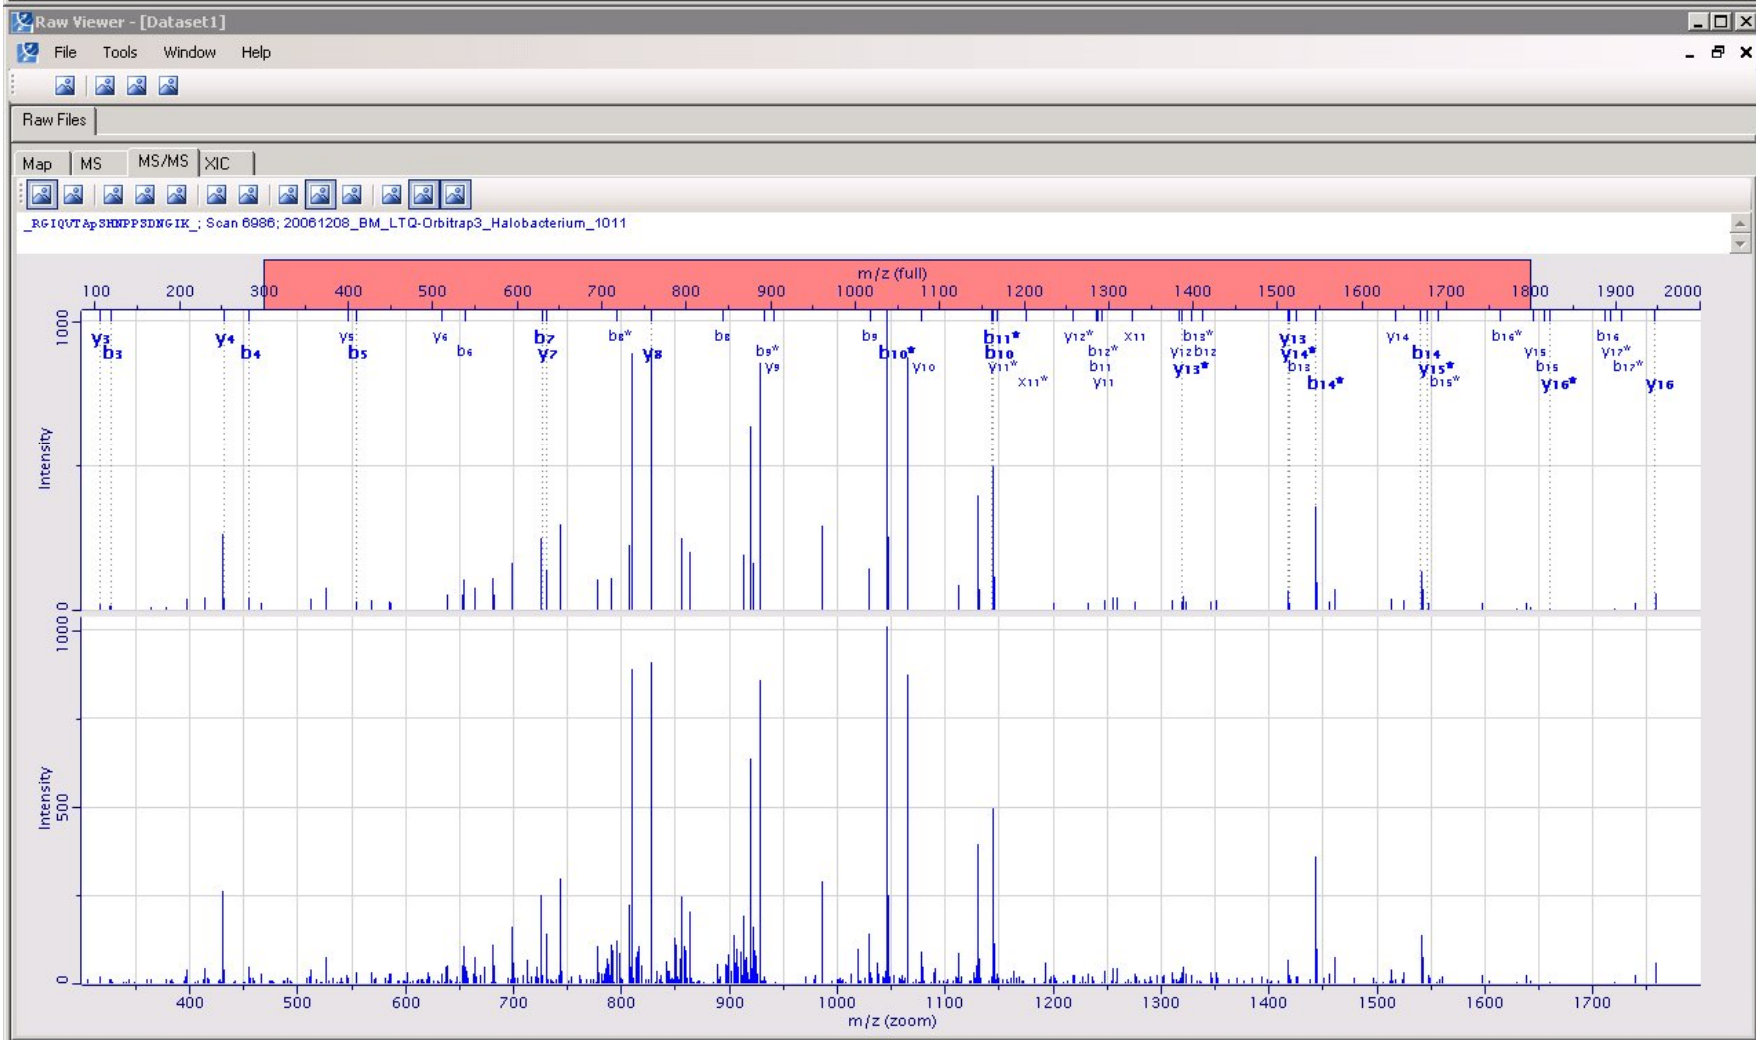

| Result Explorer                                                                                  |                       |               |           |                  |                      |                |          |                 |                  |              |        |                   |               |                 |         |         |         |
|--------------------------------------------------------------------------------------------------|-----------------------|---------------|-----------|------------------|----------------------|----------------|----------|-----------------|------------------|--------------|--------|-------------------|---------------|-----------------|---------|---------|---------|
| Summary   Identifications   Modifications   All Peptides   MS Scans   MS/MS Scans   All Proteins |                       |               |           |                  |                      |                |          |                 |                  |              |        |                   |               |                 |         |         |         |
| Protein Groups   Peptides   Modification-Specific Peptides   Evidence   MS/MS                    |                       |               |           |                  |                      |                |          |                 |                  |              |        |                   |               |                 |         |         |         |
|                                                                                                  | Sequence              | Modifications | Mass      | Mass Error [ppm] | Mass Fractional Part | Protein Groups | Proteins | Unique (Groups) | Unique (Protein) | Oxidatic (M) | phosph | N-Acety (Protein) | Slice Average | Slice Std. Dev. | Slice 1 | Slice 2 | Slice 3 |
| ▶ 40                                                                                             | RAAGIVTDEGGMTSHAAIVSR | phospho(STY)  | 2178.0253 | -1.0018          | 0.0252668...         | 87             | DE1500R  | yes             | yes              | 0            | 1      | 0                 | 4.85          | 2.34            | 5       | 13      | 12      |

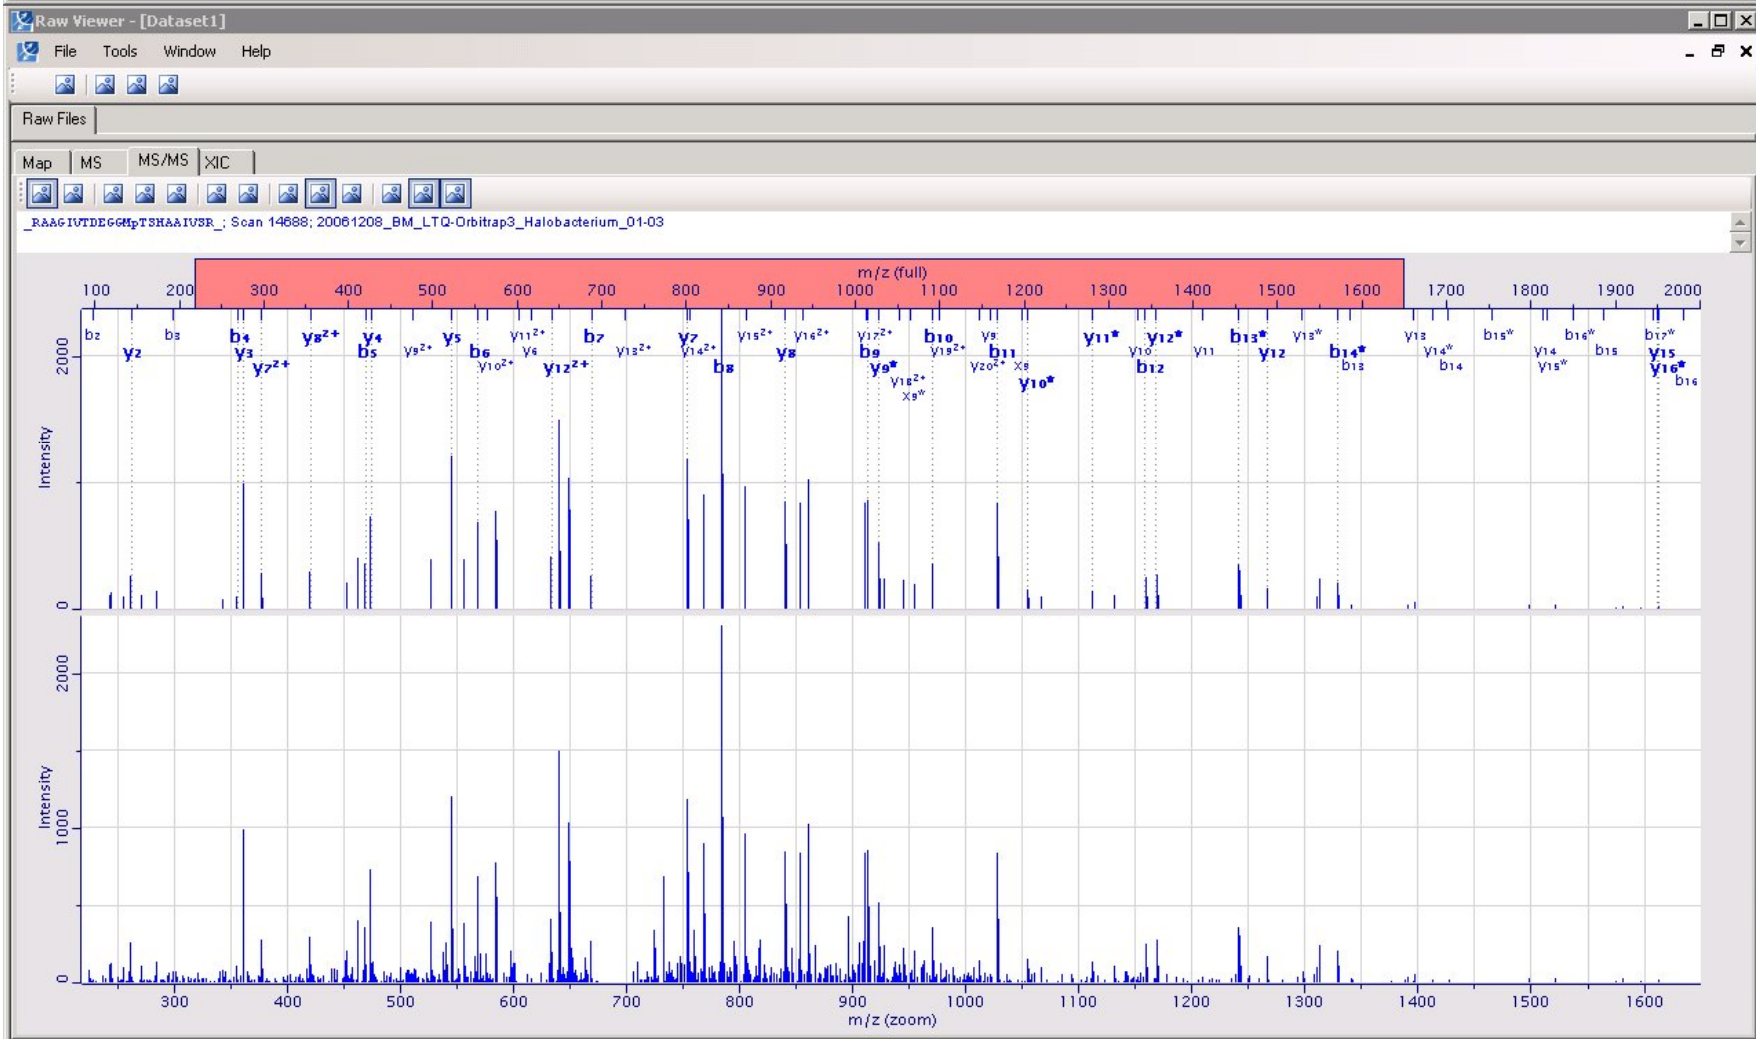



**Result Explorer**

Summary | Identifications | Modifications | All Peptides | MS Scans | MS/MS Scans | All Proteins

Protein Groups | Peptides | **Modification-Specific Peptides** | Evidence | MS/MS

|      | Sequence              | Modifications            | Mass      | Mass Error [ppm] | Mass Fractional Part | Protein Groups | Proteins | Unique (Groups) | Unique (Protein) | Oxidatic (M) | phosph | N-Acety (Protein) | Slice Average | Slice Std. Dev. | Slice 1 | Slice 2 | Slice 3 |
|------|-----------------------|--------------------------|-----------|------------------|----------------------|----------------|----------|-----------------|------------------|--------------|--------|-------------------|---------------|-----------------|---------|---------|---------|
| ▶ 41 | RAAGIVTDEGGMTSHAAIVSR | Oxidation (M), phosph... | 2194.0202 | -1.098           | 0.0201922...         | 87             | DE1500R  | yes             | yes              | 1            | 1      | 0                 | 4.29          | 2.6             | 20      | 25      | 7       |

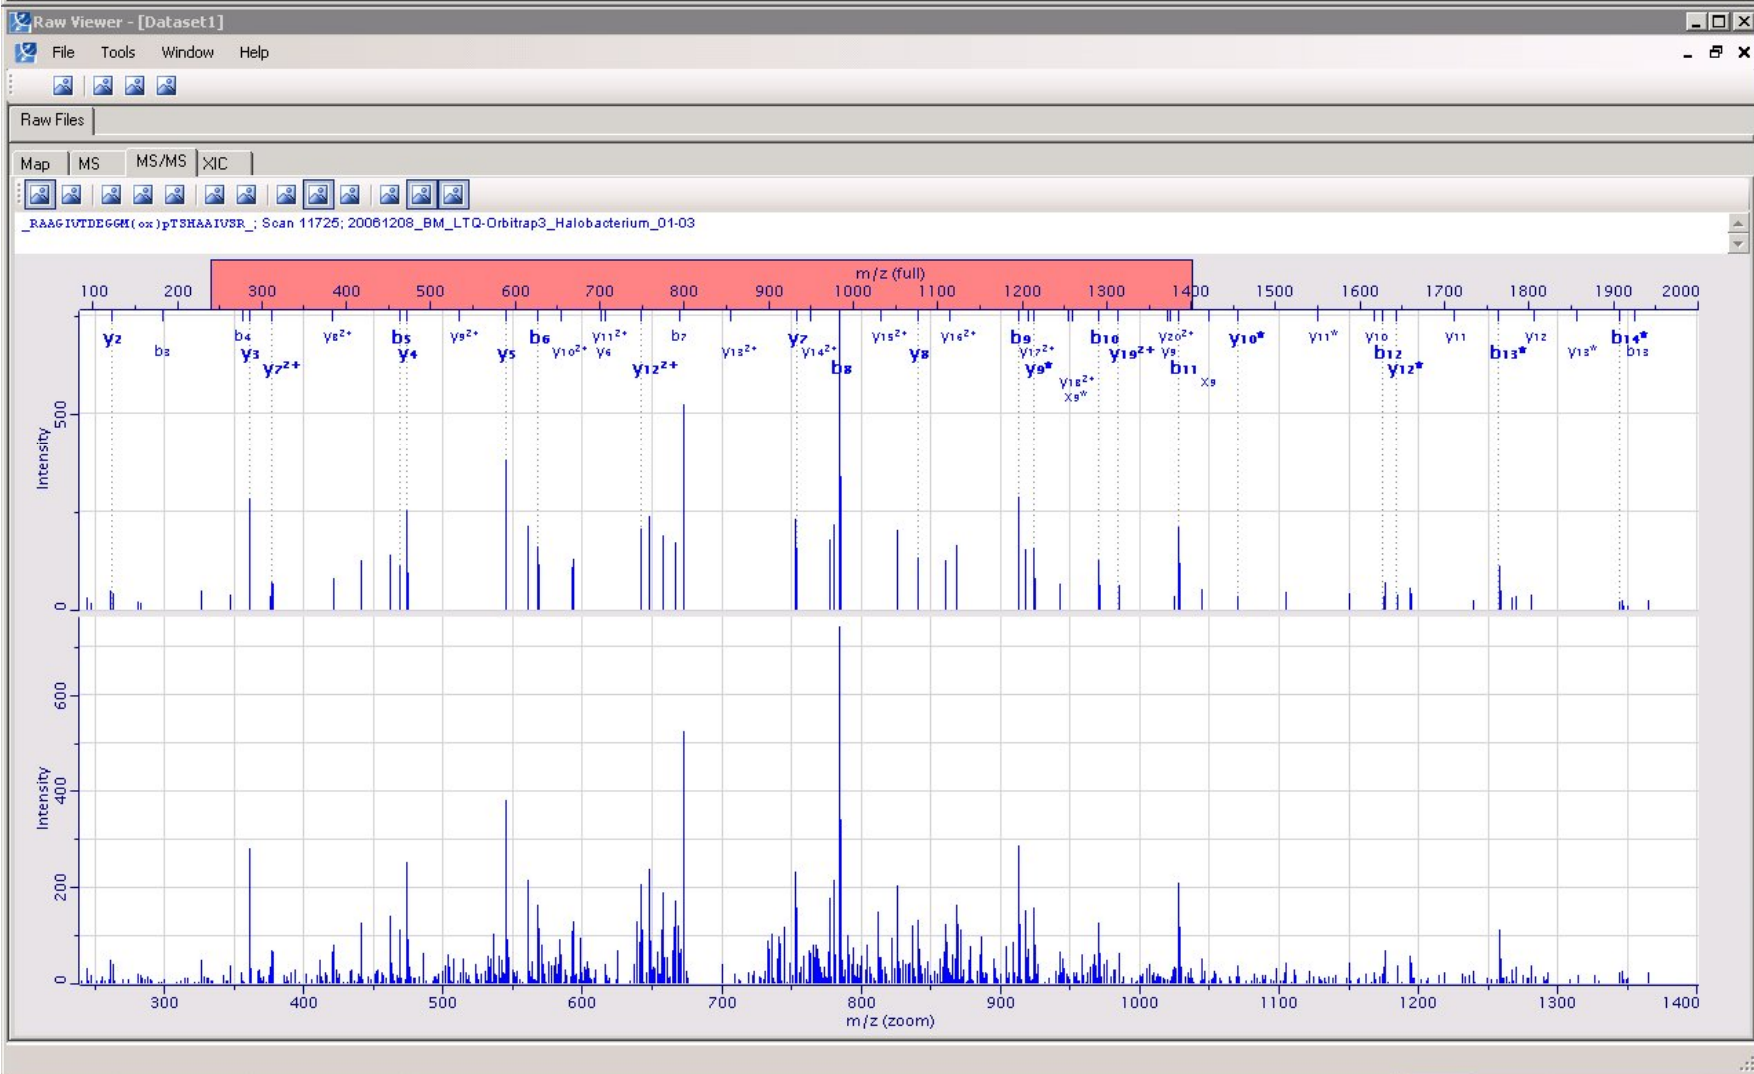

| Result Explorer                                                                                  |                 |               |           |                  |                      |                |          |                 |                  |              |        |                   |               |                 |         |         |         |
|--------------------------------------------------------------------------------------------------|-----------------|---------------|-----------|------------------|----------------------|----------------|----------|-----------------|------------------|--------------|--------|-------------------|---------------|-----------------|---------|---------|---------|
| Summary   Identifications   Modifications   All Peptides   MS Scans   MS/MS Scans   All Proteins |                 |               |           |                  |                      |                |          |                 |                  |              |        |                   |               |                 |         |         |         |
| Protein Groups   Peptides   Modification-Specific Peptides   Evidence   MS/MS                    |                 |               |           |                  |                      |                |          |                 |                  |              |        |                   |               |                 |         |         |         |
|                                                                                                  | Sequence        | Modifications | Mass      | Mass Error [ppm] | Mass Fractional Part | Protein Groups | Proteins | Unique (Groups) | Unique (Protein) | Oxidatic (M) | phosph | N-Acety (Protein) | Slice Average | Slice Std. Dev. | Slice 1 | Slice 2 | Slice 3 |
| ▶ 42                                                                                             | NQAVQNPDTIASIKR | phospho(STY)  | 1861.9047 | -0.61367         | 0.90474097           | 153            | OE1737R  | yes             | yes              | 0            | 1      | 0                 | 5             | 0               |         |         |         |

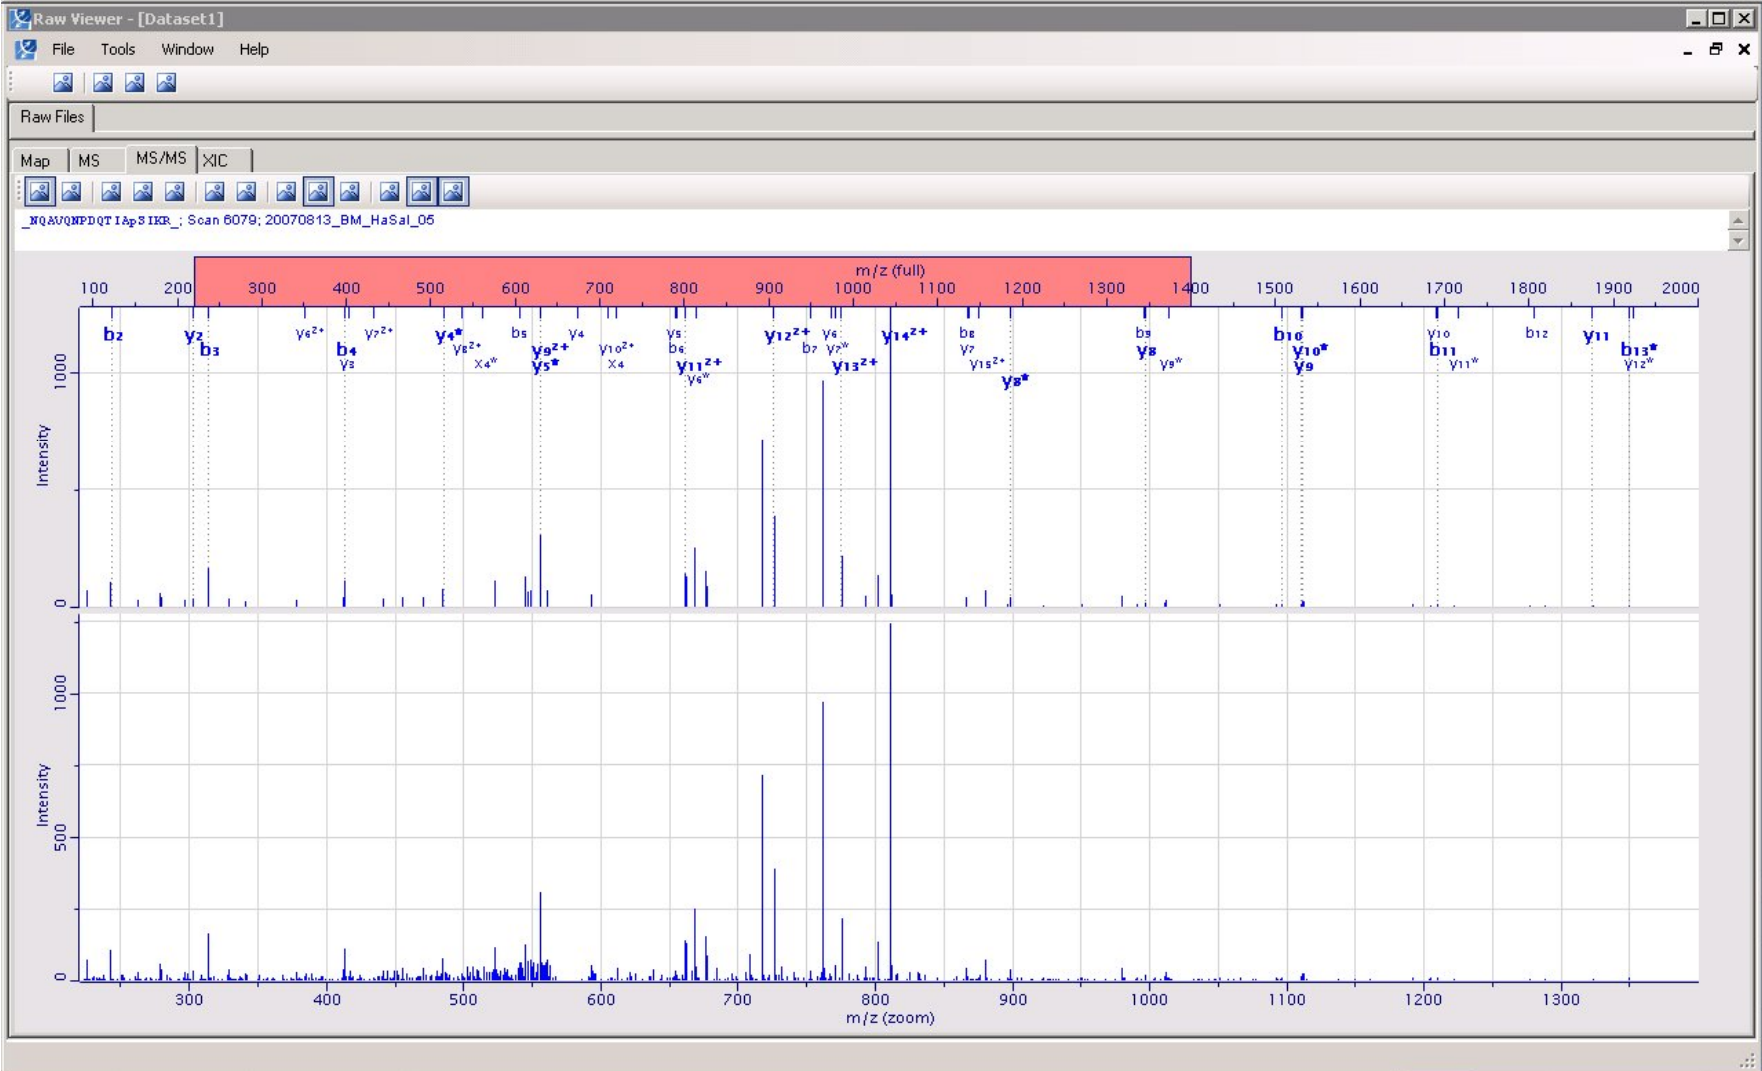

Result Explorer

Summary | Identifications | Modifications | All Peptides | MS Scans | MS/MS Scans | All Proteins

Protein Groups | Peptides | **Modification-Specific Peptides** | Evidence | MS/MS

|      | Sequence                 | Modifications | Mass      | Mass Error [ppm] | Mass Fractional Part | Protein Groups | Proteins | Unique (Groups) | Unique (Protein) | Oxidatic (M) | phosph | N-Acety (Protein) | Slice Average | Slice Std. Dev. | Slice 1 | Slice 2 | Slice 3 |
|------|--------------------------|---------------|-----------|------------------|----------------------|----------------|----------|-----------------|------------------|--------------|--------|-------------------|---------------|-----------------|---------|---------|---------|
| ▶ 43 | NPSEEAIVGDEEVKPLTENLDDLK | phospho(STY)  | 2811.2488 | -0.30905         | 0.2487802            | 400            | OE2623R  | yes             | yes              | 0            | 1      | 0                 | 7.5           | 0.5             |         |         |         |

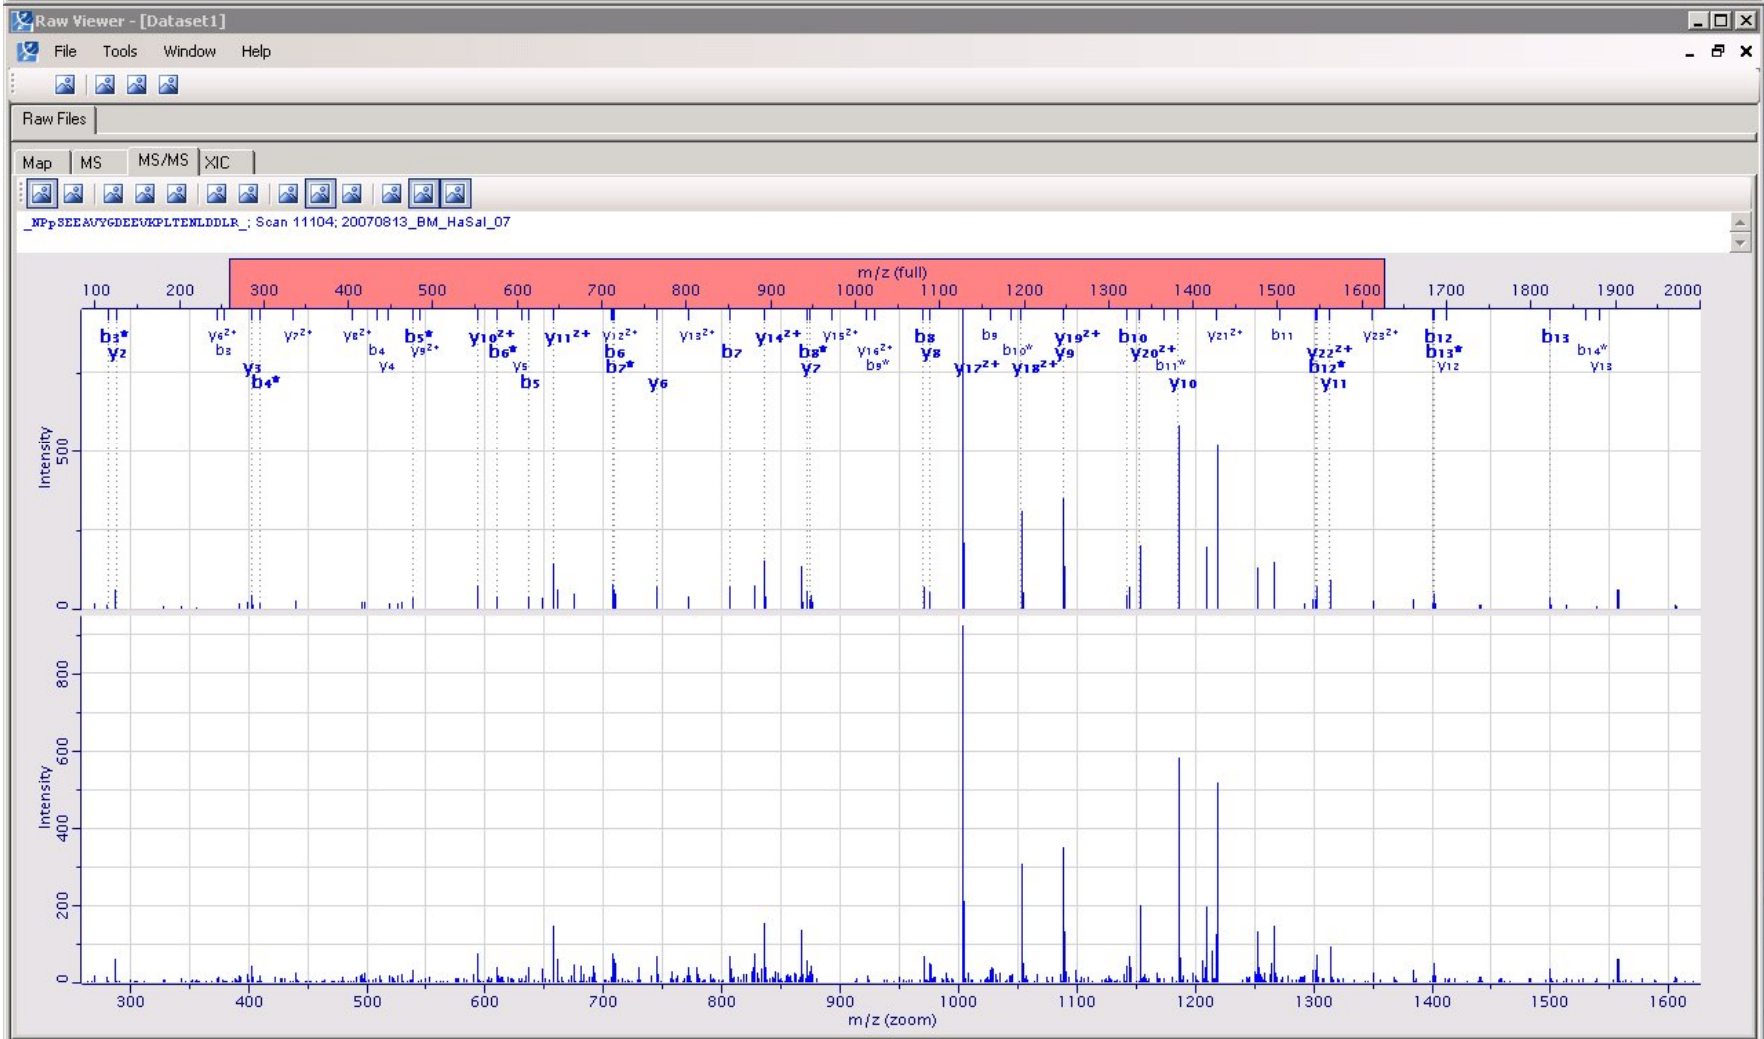

Result Explorer

Summary | Identifications | Modifications | All Peptides | MS Scans | MS/MS Scans | All Proteins

Protein Groups | Peptides | Modification-Specific Peptides | Evidence | MS/MS

|    | Sequence                    | Modifications | Mass      | Mass Error [ppm] | Mass Fractional Part | Protein Groups | Proteins | Unique (Groups) | Unique (Protein) | Oxidative (M) | phosph | N-Acety (Protein) | Slice Average | Slice Std. Dev. | Slice 1 | Slice 2 | Slice 3 |
|----|-----------------------------|---------------|-----------|------------------|----------------------|----------------|----------|-----------------|------------------|---------------|--------|-------------------|---------------|-----------------|---------|---------|---------|
| 44 | NEDVGDYVTANDLEPGDDIPSELD... | phospho(STY)  | 3798.6283 | -0.018352        | 0.62825094           | 141            | DE1684F  | yes             | yes              | 0             | 1      | 0                 | 3             | 0               |         |         | 1       |

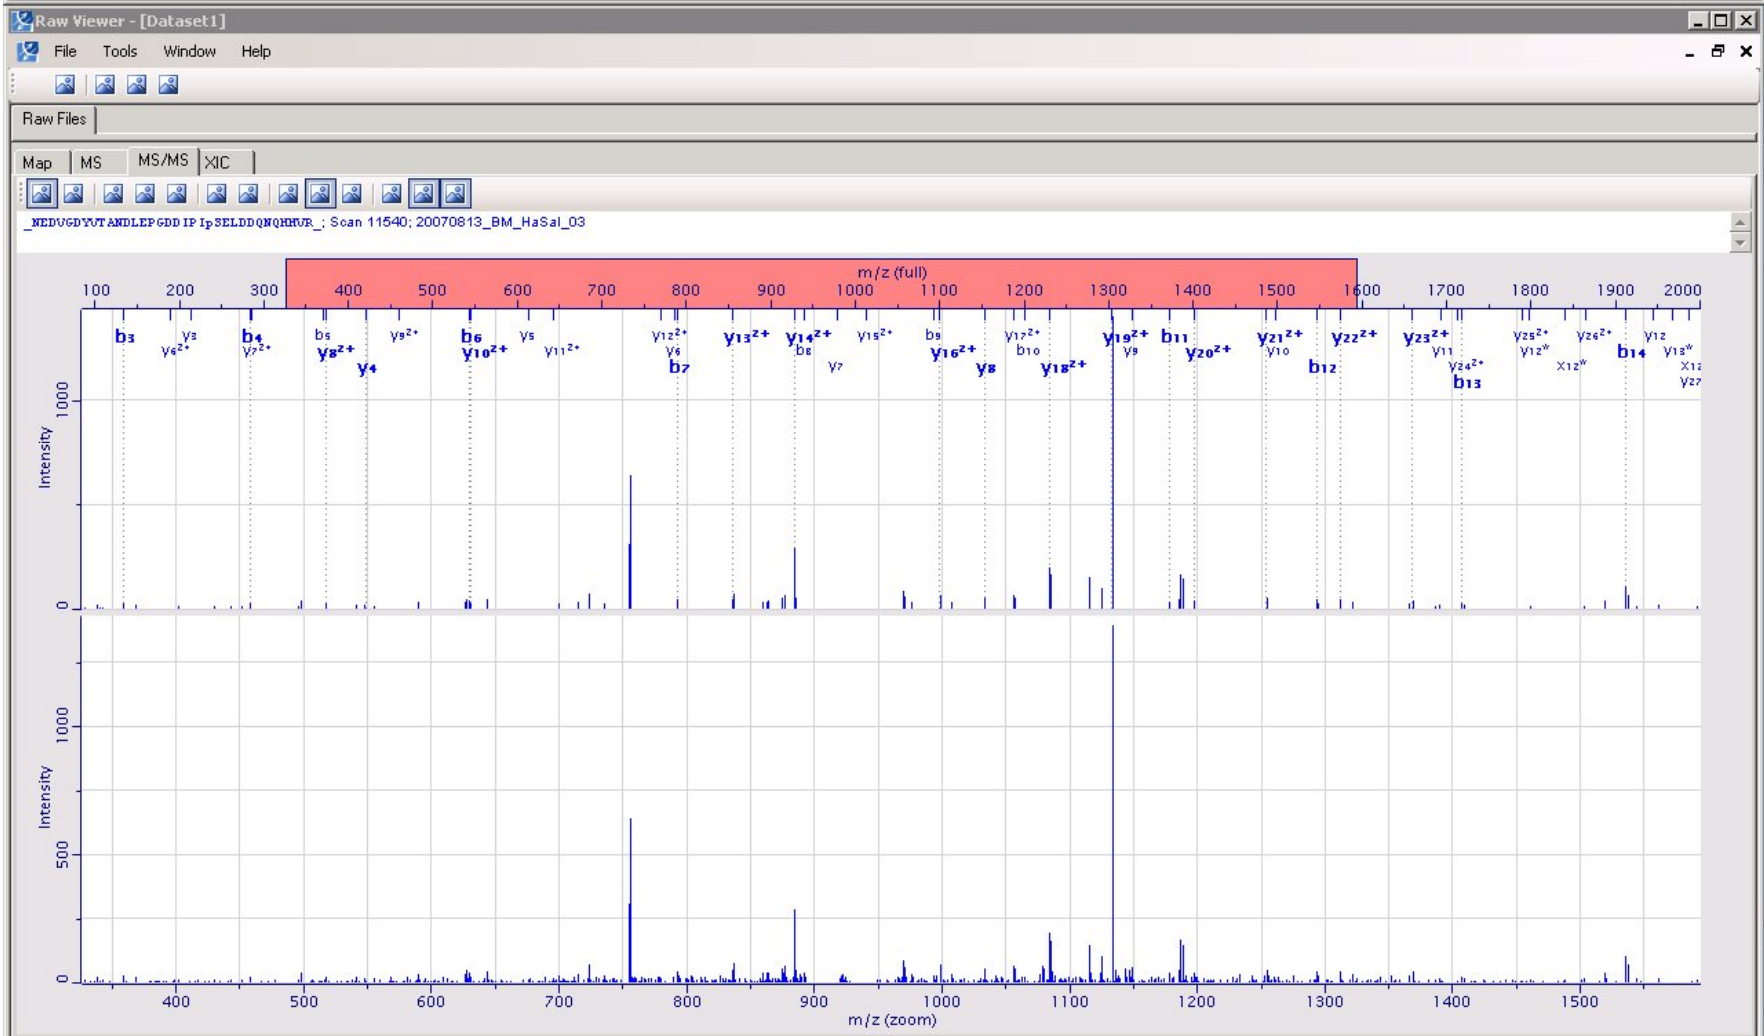

| Result Explorer                                                                                  |           |               |          |                  |                      |                |          |                 |                  |               |        |                   |               |                 |         |         |         |
|--------------------------------------------------------------------------------------------------|-----------|---------------|----------|------------------|----------------------|----------------|----------|-----------------|------------------|---------------|--------|-------------------|---------------|-----------------|---------|---------|---------|
| Summary   Identifications   Modifications   All Peptides   MS Scans   MS/MS Scans   All Proteins |           |               |          |                  |                      |                |          |                 |                  |               |        |                   |               |                 |         |         |         |
| Protein Groups   Peptides   Modification-Specific Peptides   Evidence   MS/MS                    |           |               |          |                  |                      |                |          |                 |                  |               |        |                   |               |                 |         |         |         |
|                                                                                                  | Sequence  | Modifications | Mass     | Mass Error [ppm] | Mass Fractional Part | Protein Groups | Proteins | Unique (Groups) | Unique (Protein) | Oxidative (M) | phosph | N-Acety (Protein) | Slice Average | Slice Std. Dev. | Slice 1 | Slice 2 | Slice 3 |
| ▶ 45                                                                                             | MVGGLLYTR | phospho(STY)  | 1088.509 | 0.68726          | 0.50896825           | 956            | DE4600F  | yes             | yes              | 0             | 1      | 0                 | 6             | 0               |         |         |         |

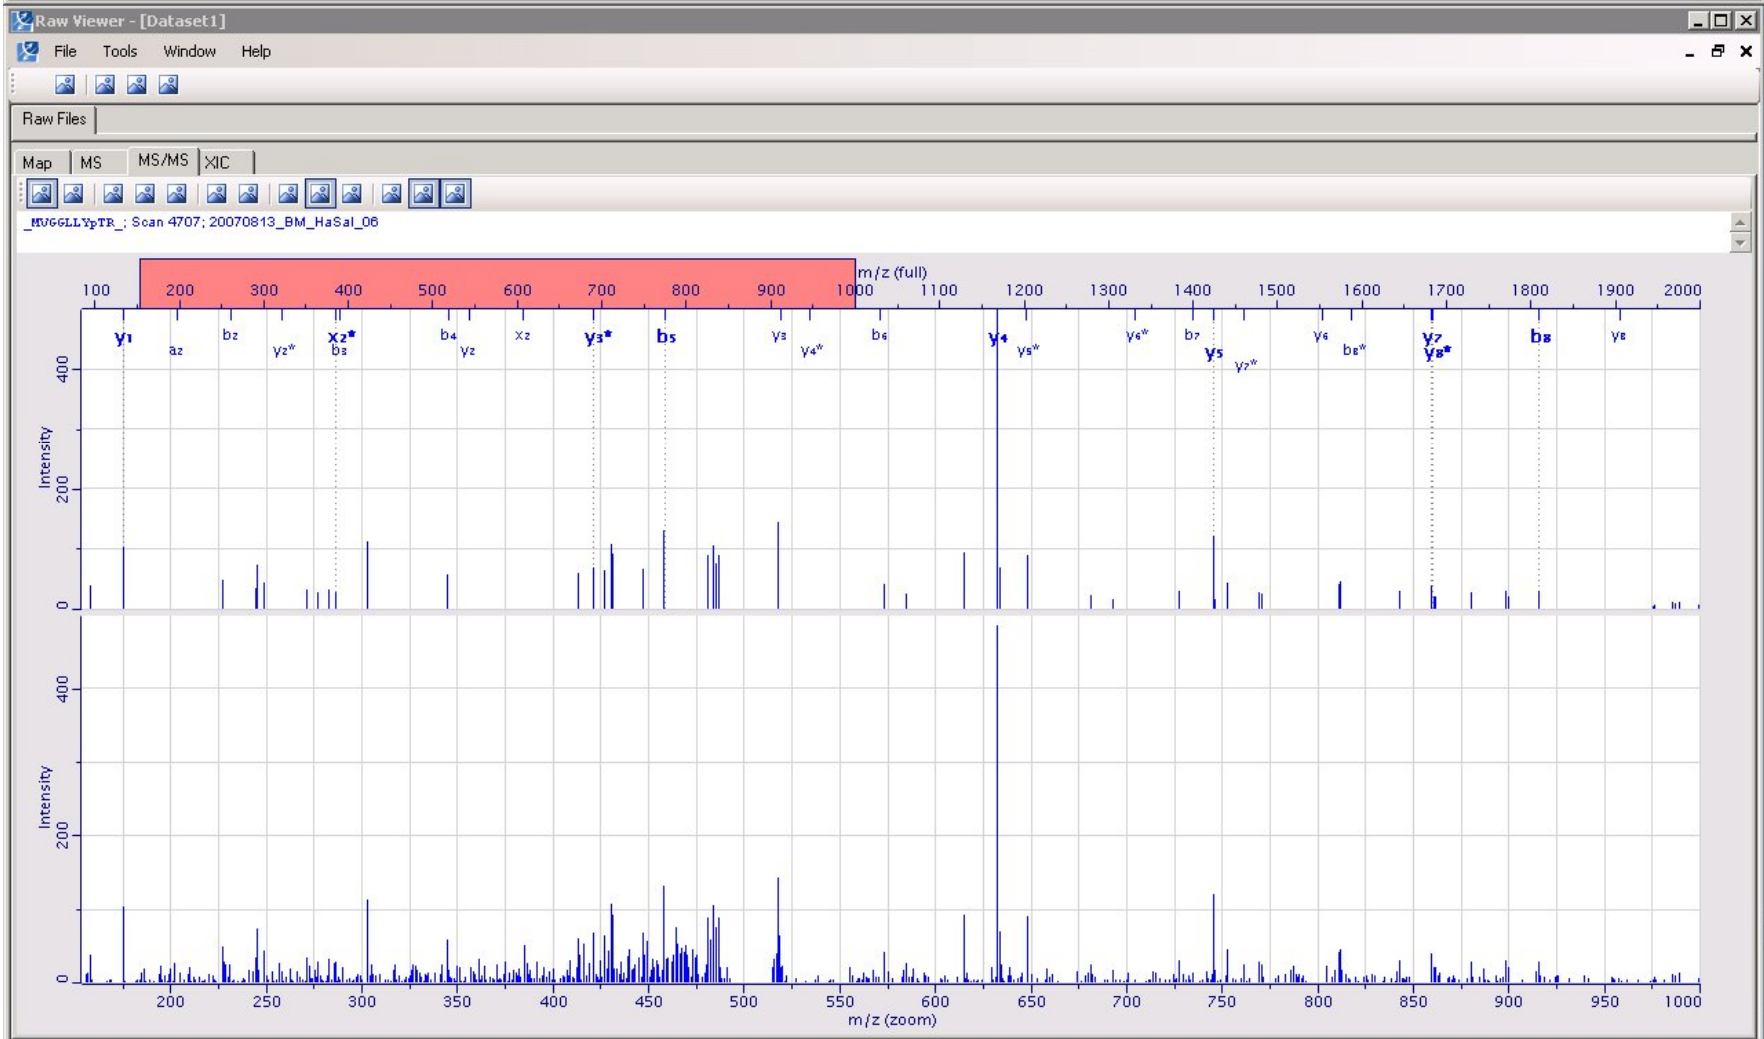

| Result Explorer                                                                                  |                       |                          |           |                  |                      |                |          |                 |                  |              |        |                   |               |                 |         |         |         |
|--------------------------------------------------------------------------------------------------|-----------------------|--------------------------|-----------|------------------|----------------------|----------------|----------|-----------------|------------------|--------------|--------|-------------------|---------------|-----------------|---------|---------|---------|
| Summary   Identifications   Modifications   All Peptides   MS Scans   MS/MS Scans   All Proteins |                       |                          |           |                  |                      |                |          |                 |                  |              |        |                   |               |                 |         |         |         |
| Protein Groups   Peptides   Modification-Specific Peptides   Evidence   MS/MS                    |                       |                          |           |                  |                      |                |          |                 |                  |              |        |                   |               |                 |         |         |         |
|                                                                                                  | Sequence              | Modifications            | Mass      | Mass Error [ppm] | Mass Fractional Part | Protein Groups | Proteins | Unique (Groups) | Unique (Protein) | Oxidatic (M) | phosph | N-Acety (Protein) | Slice Average | Slice Std. Dev. | Slice 1 | Slice 2 | Slice 3 |
| ▶ 46                                                                                             | MSSSEPAHISLLDDPETGADK | Oxidation (M), phosph... | 2381.9934 | -0.20612         | 0.99342791           | 810            | OE4101R  | yes             | yes              | 1            | 1      | 0                 | 7             | 0               |         |         |         |

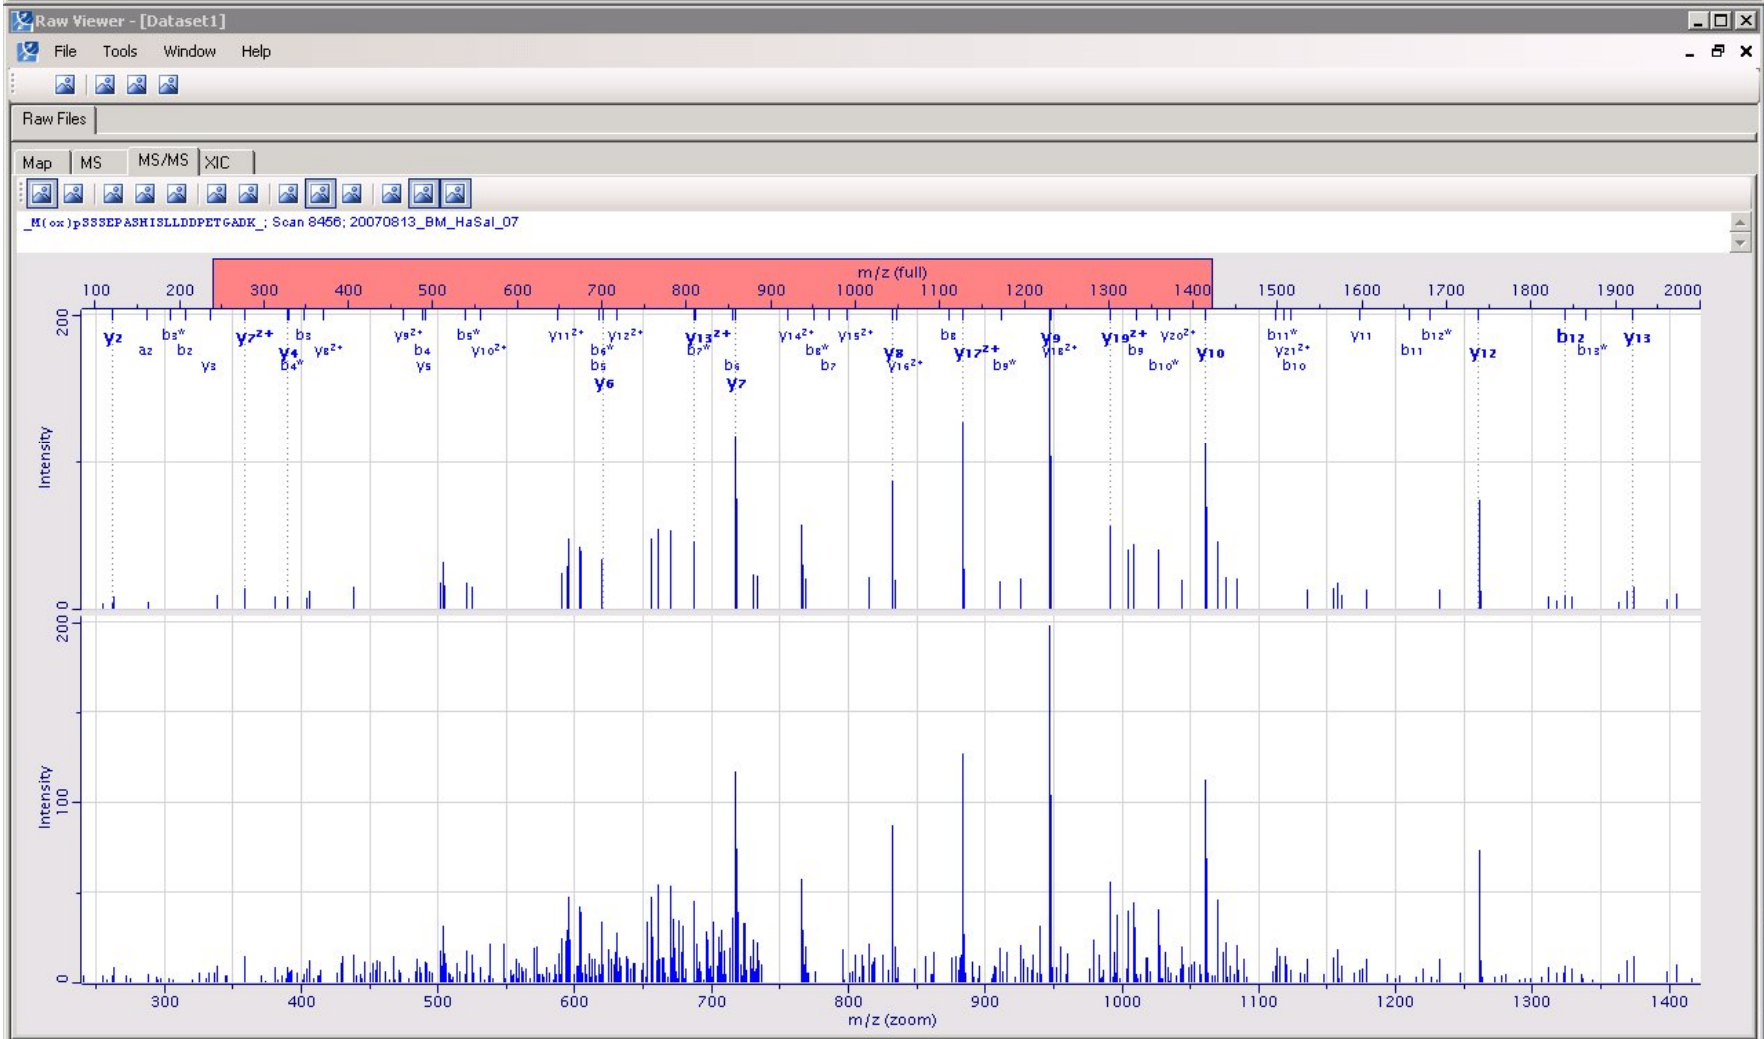

| Result Explorer                                                                                  |                    |                          |           |                  |                      |                |          |                 |                  |              |        |                   |               |                 |         |         |         |
|--------------------------------------------------------------------------------------------------|--------------------|--------------------------|-----------|------------------|----------------------|----------------|----------|-----------------|------------------|--------------|--------|-------------------|---------------|-----------------|---------|---------|---------|
| Summary   Identifications   Modifications   All Peptides   MS Scans   MS/MS Scans   All Proteins |                    |                          |           |                  |                      |                |          |                 |                  |              |        |                   |               |                 |         |         |         |
| Protein Groups   Peptides   Modification-Specific Peptides   Evidence   MS/MS                    |                    |                          |           |                  |                      |                |          |                 |                  |              |        |                   |               |                 |         |         |         |
|                                                                                                  | Sequence           | Modifications            | Mass      | Mass Error [ppm] | Mass Fractional Part | Protein Groups | Proteins | Unique (Groups) | Unique (Protein) | Oxidatic (M) | phosph | N-Acety (Protein) | Slice Average | Slice Std. Dev. | Slice 1 | Slice 2 | Slice 3 |
| ▶ 47                                                                                             | MDWDYDESKYNEWVSGVK | Oxidation (M), phosph... | 2270.9654 | -0.66384         | 0.96542225           | 992            | DE4721R  | yes             | yes              | 1            | 1      | 0                 | 6             | 0               |         |         |         |

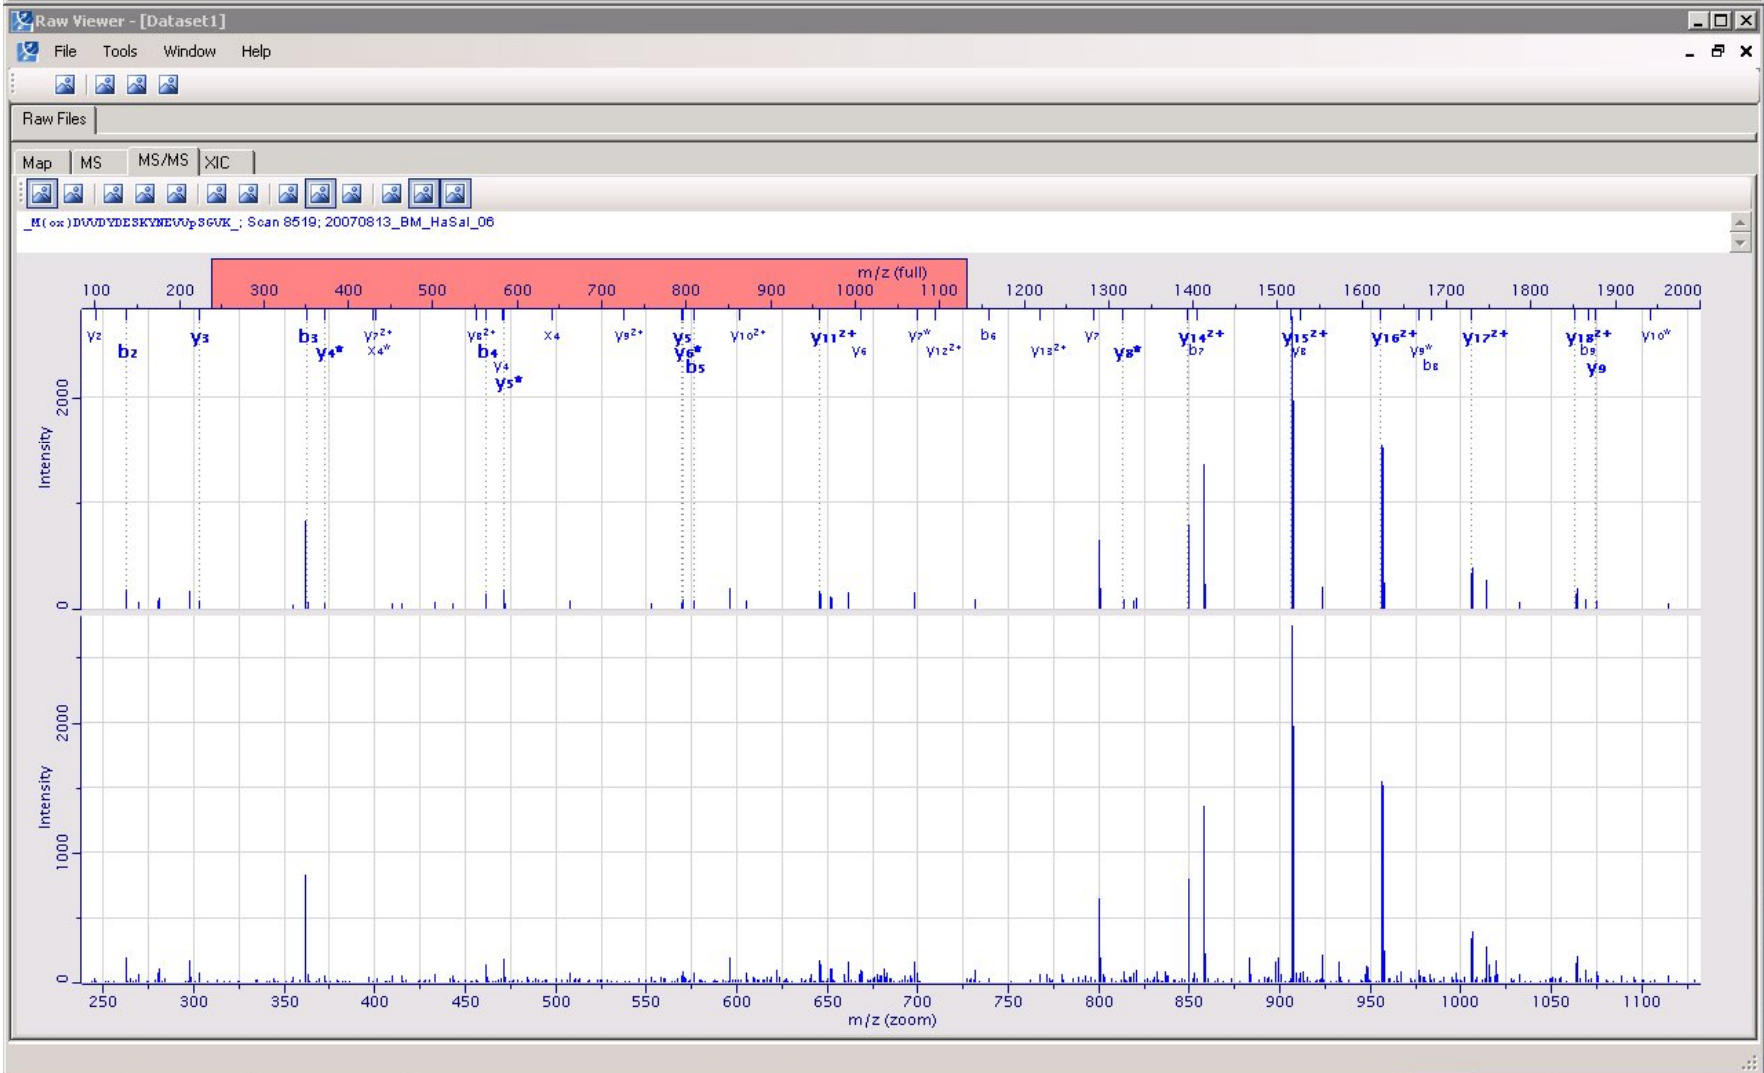

Result Explorer

Summary | Identifications | Modifications | All Peptides | MS Scans | MS/MS Scans | All Proteins

Protein Groups | Peptides | Modification-Specific Peptides | Evidence | MS/MS

|    | Sequence         | Modifications | Mass      | Mass Error [ppm] | Mass Fractional Part | Protein Groups | Proteins | Unique (Groups) | Unique (Protein) | Oxidatic (M) | phosph | N-Acety (Protein) | Slice Average | Slice Std. Dev. | Slice 1 | Slice 2 | Slice 3 | Slice 4 |  |
|----|------------------|---------------|-----------|------------------|----------------------|----------------|----------|-----------------|------------------|--------------|--------|-------------------|---------------|-----------------|---------|---------|---------|---------|--|
| 48 | LVSNPGQSEDAIQTRK | phospho(STY)  | 1821.8622 | -0.49719         | 0.86220745           | 869            | DE4305R  | yes             | yes              | 0            | 1      | 0                 | 4             | 0               |         |         |         |         |  |

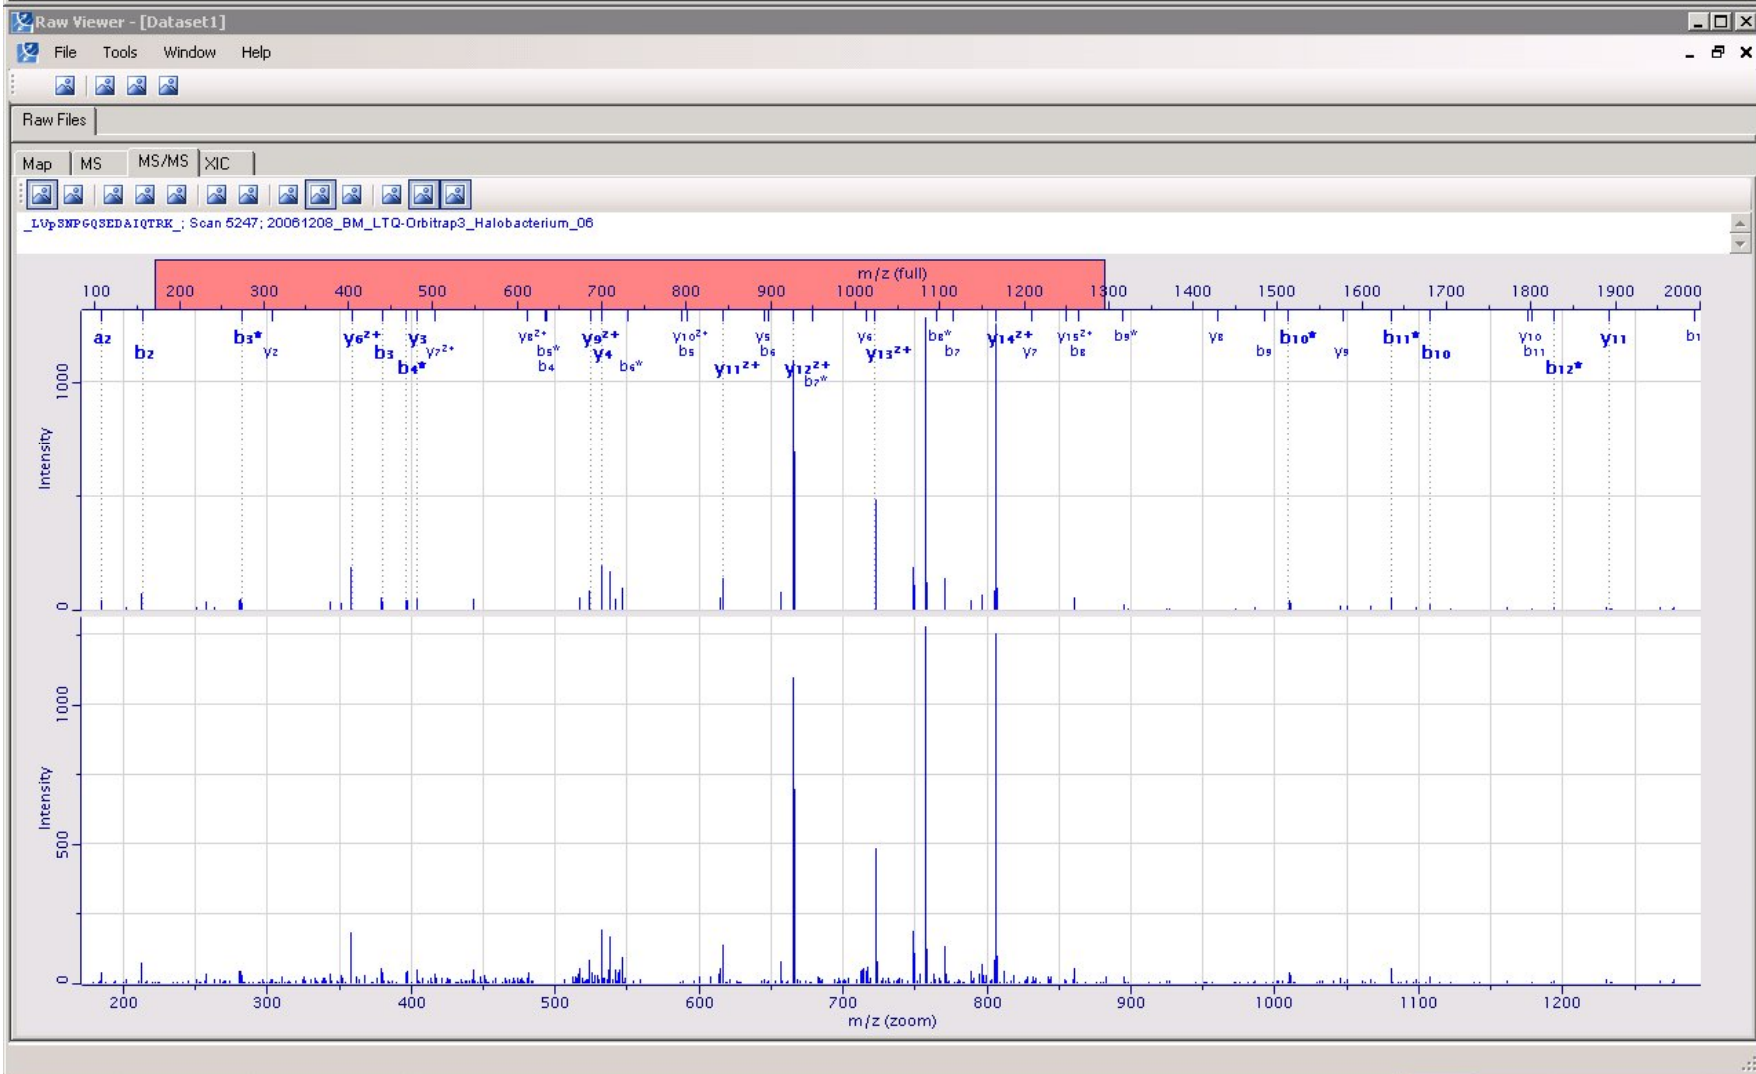



| Result Explorer                                                                                  |             |               |           |                  |                      |                |          |                 |                  |              |        |                   |               |                 |         |         |         |
|--------------------------------------------------------------------------------------------------|-------------|---------------|-----------|------------------|----------------------|----------------|----------|-----------------|------------------|--------------|--------|-------------------|---------------|-----------------|---------|---------|---------|
| Summary   Identifications   Modifications   All Peptides   MS Scans   MS/MS Scans   All Proteins |             |               |           |                  |                      |                |          |                 |                  |              |        |                   |               |                 |         |         |         |
| Protein Groups   Peptides   <b>Modification-Specific Peptides</b>   Evidence   MS/MS             |             |               |           |                  |                      |                |          |                 |                  |              |        |                   |               |                 |         |         |         |
|                                                                                                  | Sequence    | Modifications | Mass      | Mass Error [ppm] | Mass Fractional Part | Protein Groups | Proteins | Unique (Groups) | Unique (Protein) | Oxidatic (M) | phosph | N-Acety (Protein) | Slice Average | Slice Std. Dev. | Slice 1 | Slice 2 | Slice 3 |
| ▶ 49                                                                                             | LRDFADSVSGR | phospho(STY)  | 1301.5765 | 0.7811           | 0.57653054           | 764            | OE3925R  | yes             | yes              | 0            | 1      | 0                 | 3             | 0               |         |         | 3       |

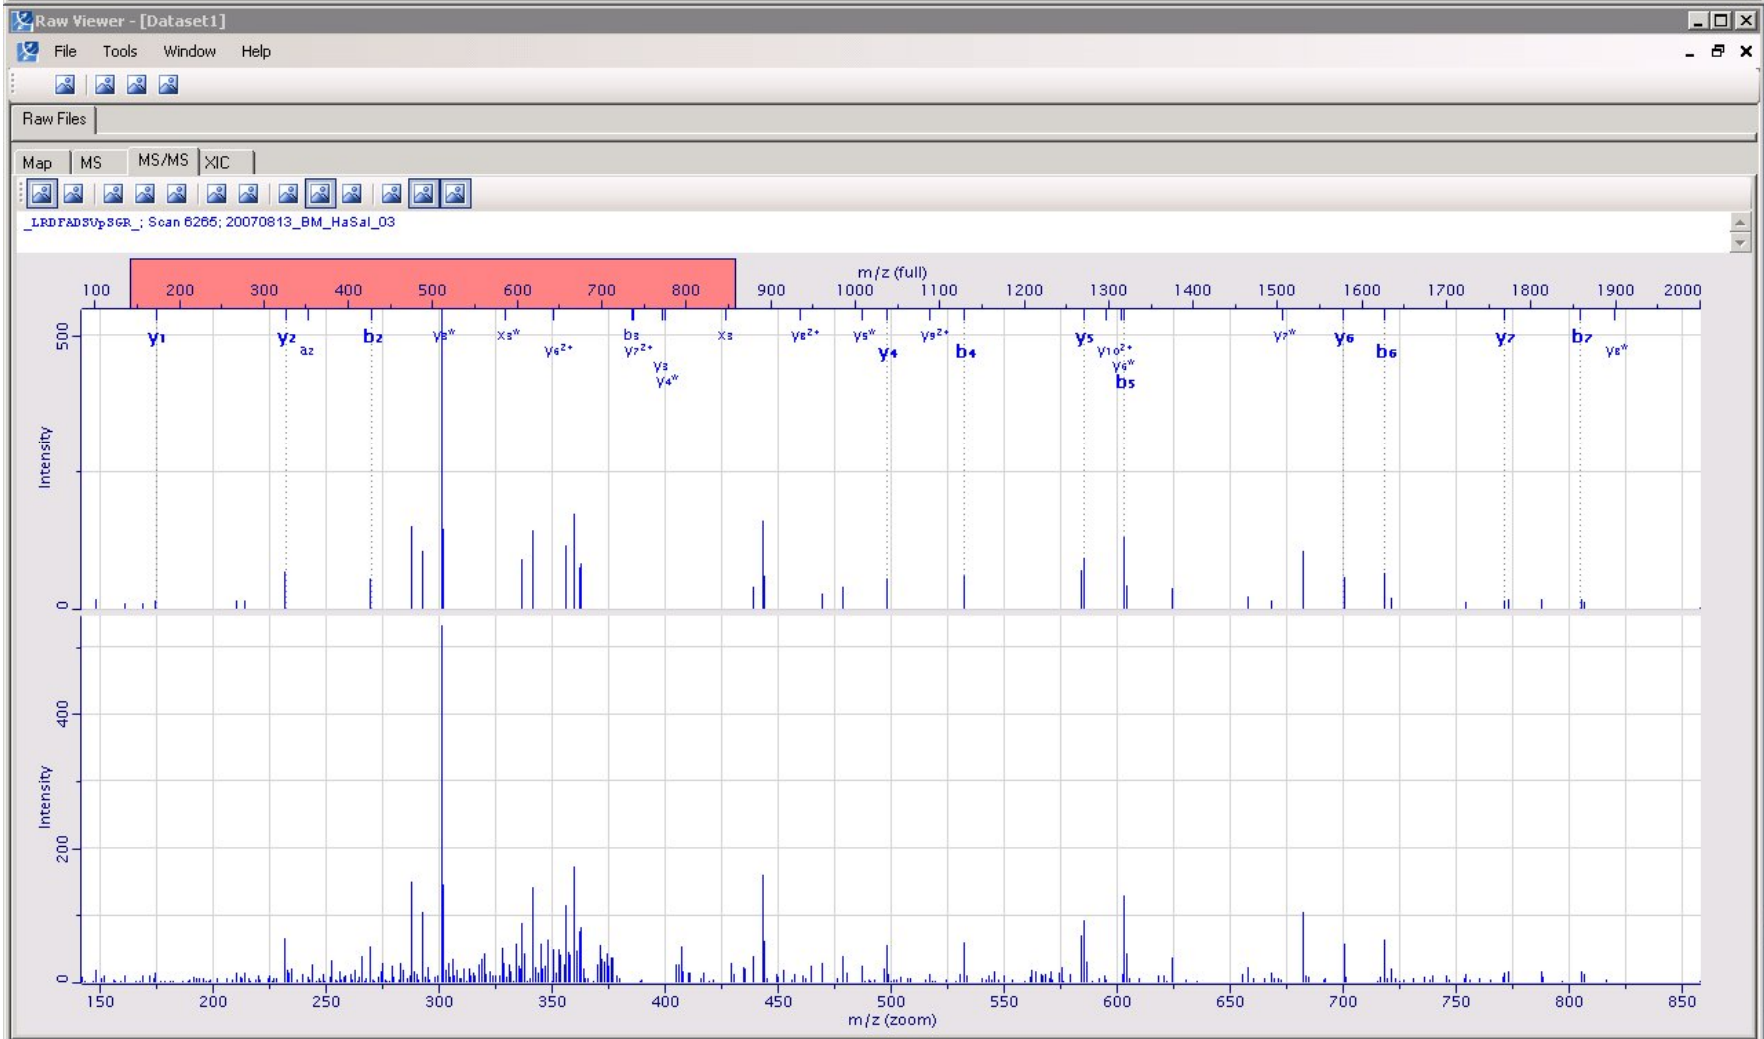

| Result Explorer                                                                                  |             |               |           |                  |                      |                |          |                 |                  |              |        |                   |               |                 |         |         |         |
|--------------------------------------------------------------------------------------------------|-------------|---------------|-----------|------------------|----------------------|----------------|----------|-----------------|------------------|--------------|--------|-------------------|---------------|-----------------|---------|---------|---------|
| Summary   Identifications   Modifications   All Peptides   MS Scans   MS/MS Scans   All Proteins |             |               |           |                  |                      |                |          |                 |                  |              |        |                   |               |                 |         |         |         |
| Protein Groups   Peptides   Modification-Specific Peptides   Evidence   MS/MS                    |             |               |           |                  |                      |                |          |                 |                  |              |        |                   |               |                 |         |         |         |
|                                                                                                  | Sequence    | Modifications | Mass      | Mass Error [ppm] | Mass Fractional Part | Protein Groups | Proteins | Unique (Groups) | Unique (Protein) | Oxidatic (M) | phosph | N-Acety (Protein) | Slice Average | Slice Std. Dev. | Slice 1 | Slice 2 | Slice 3 |
| ▶ 50                                                                                             | LDVALGSAQSR | phospho(STY)  | 1195.5538 | -0.24488         | 0.55381784           | 658            | OE3542R  | yes             | yes              | 0            | 1      | 0                 | 9             | 0               |         |         |         |

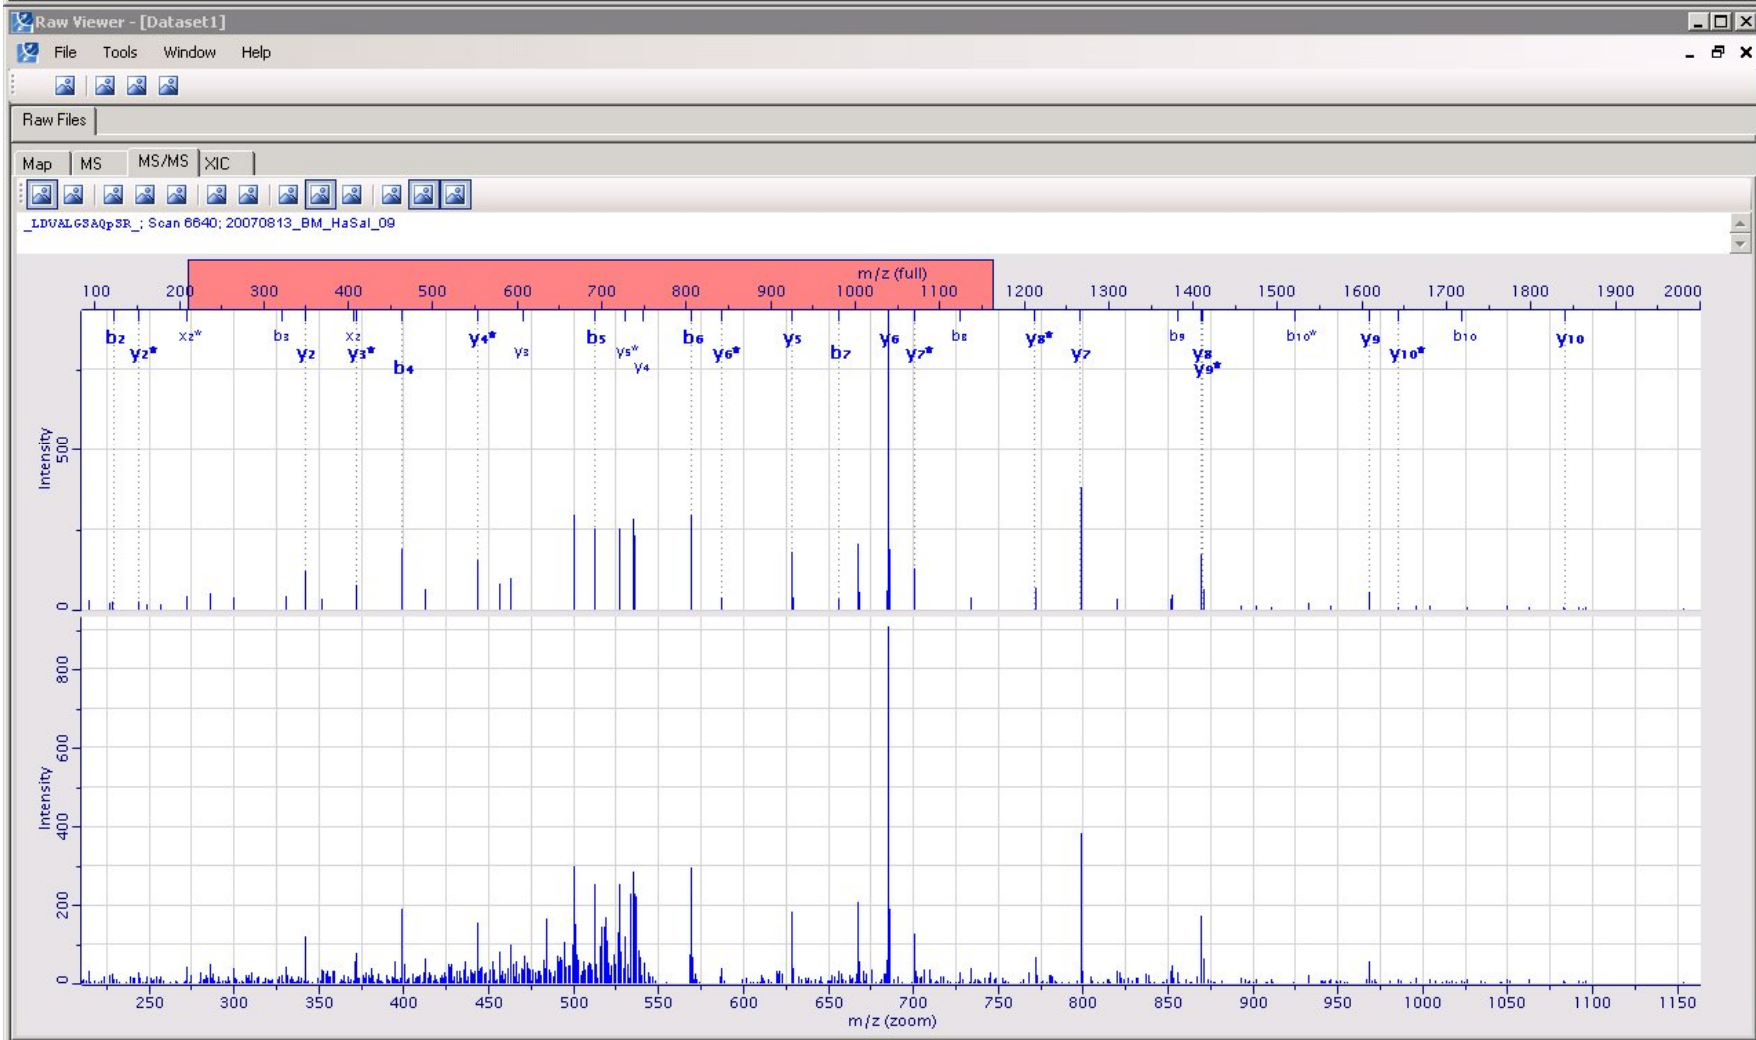

Result Explorer

Summary | Identifications | Modifications | All Peptides | MS Scans | MS/MS Scans | All Proteins

Protein Groups | Peptides | Modification-Specific Peptides | Evidence | MS/MS

|      | Sequence             | Modifications | Mass      | Mass Error [ppm] | Mass Fractional Part | Protein Groups | Proteins | Unique (Groups) | Unique (Protein) | Oxidatic (M) | phosph | N-Acety (Protein) | Slice Average | Slice Std. Dev. | Slice 1 | Slice 2 | Slice 3 |
|------|----------------------|---------------|-----------|------------------|----------------------|----------------|----------|-----------------|------------------|--------------|--------|-------------------|---------------|-----------------|---------|---------|---------|
| ▶ 51 | LDELGLDYVEHEVPSSHSDR | phospho(STY)  | 2376.0271 | 0.10641          | 0.0271005...         | 771            | DE3949R  | yes             | yes              | 0            | 1      | 0                 | 3             | 0               |         |         | 1       |

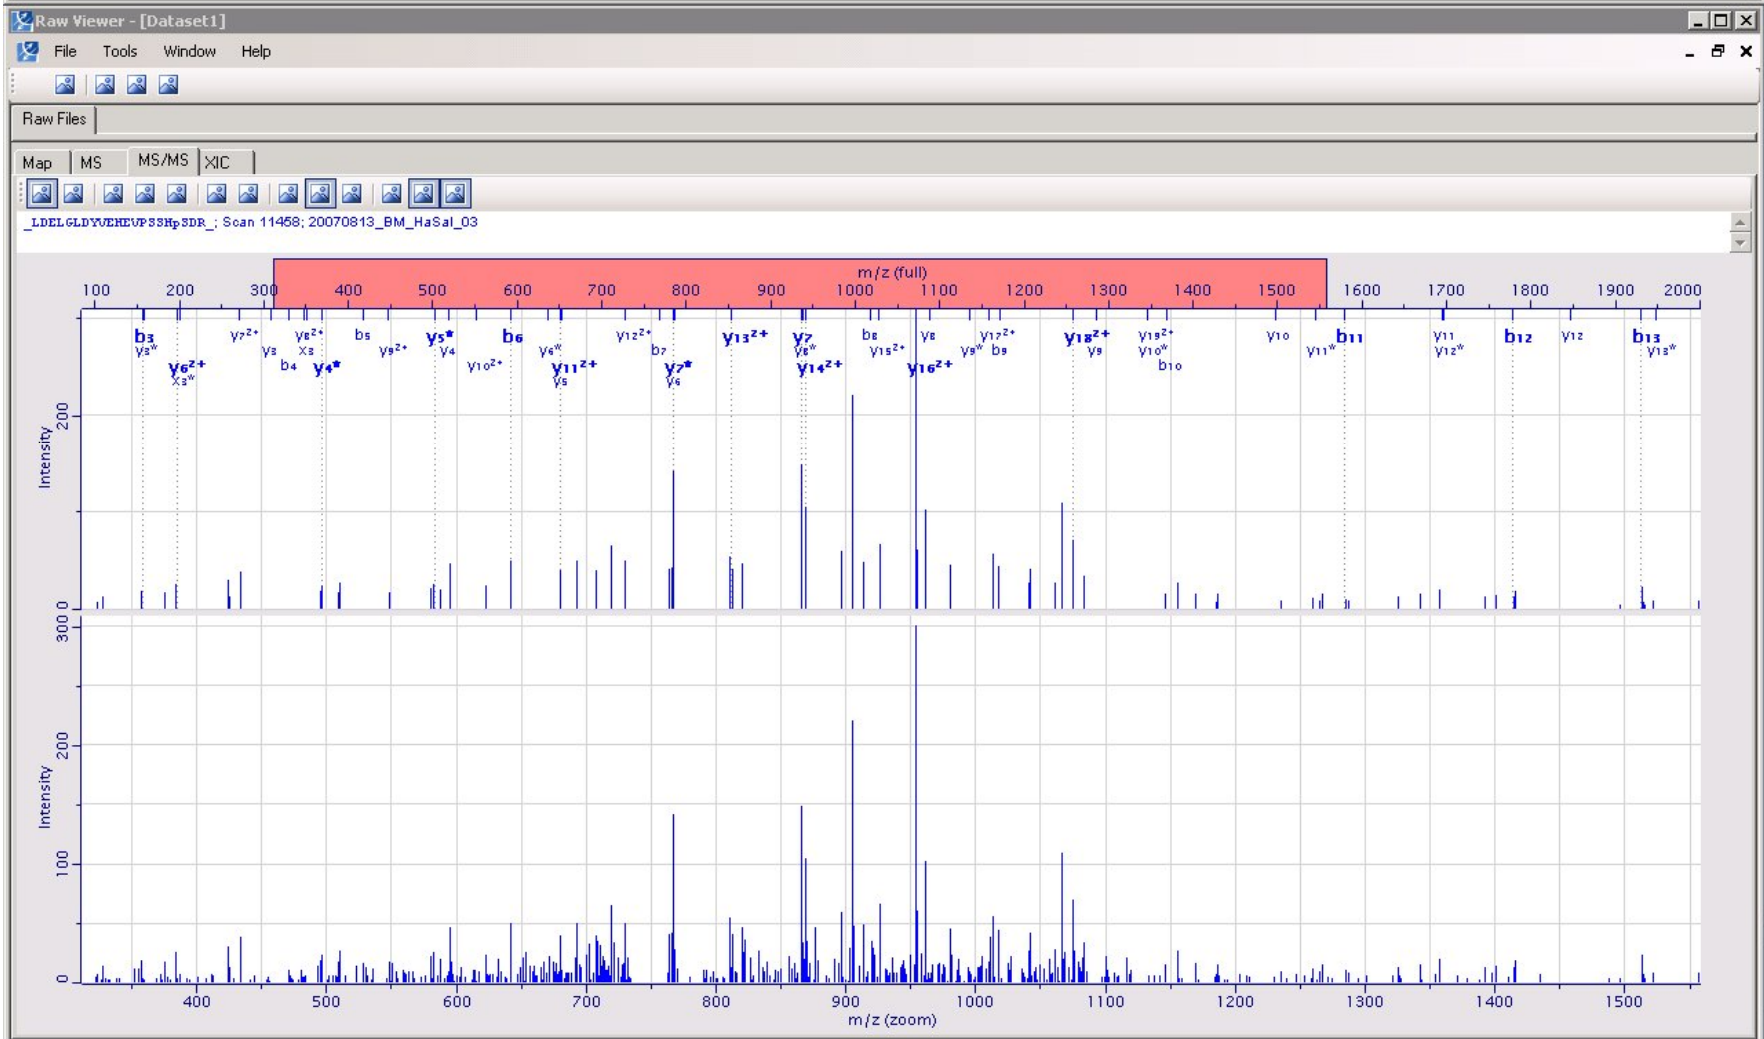

**Result Explorer**

Summary | Identifications | Modifications | All Peptides | MS Scans | MS/MS Scans | All Proteins

Protein Groups | Peptides | **Modification-Specific Peptides** | Evidence | MS/MS

|      | Sequence     | Modifications | Mass      | Mass Error [ppm] | Mass Fractional Part | Protein Groups | Proteins | Unique (Groups) | Unique (Protein) | Oxidative (M) | phosph | N-Acety (Protein) | Slice Average | Slice Std. Dev. | Slice 1 | Slice 2 | Slice 3 |
|------|--------------|---------------|-----------|------------------|----------------------|----------------|----------|-----------------|------------------|---------------|--------|-------------------|---------------|-----------------|---------|---------|---------|
| ▶ 52 | KSDPLEGAPQGR | phospho(STY)  | 1333.6027 | 0.013422         | 0.60274529           | 996            | DE4736R  | yes             | yes              | 0             | 1      | 0                 | 4             | 0               |         |         |         |

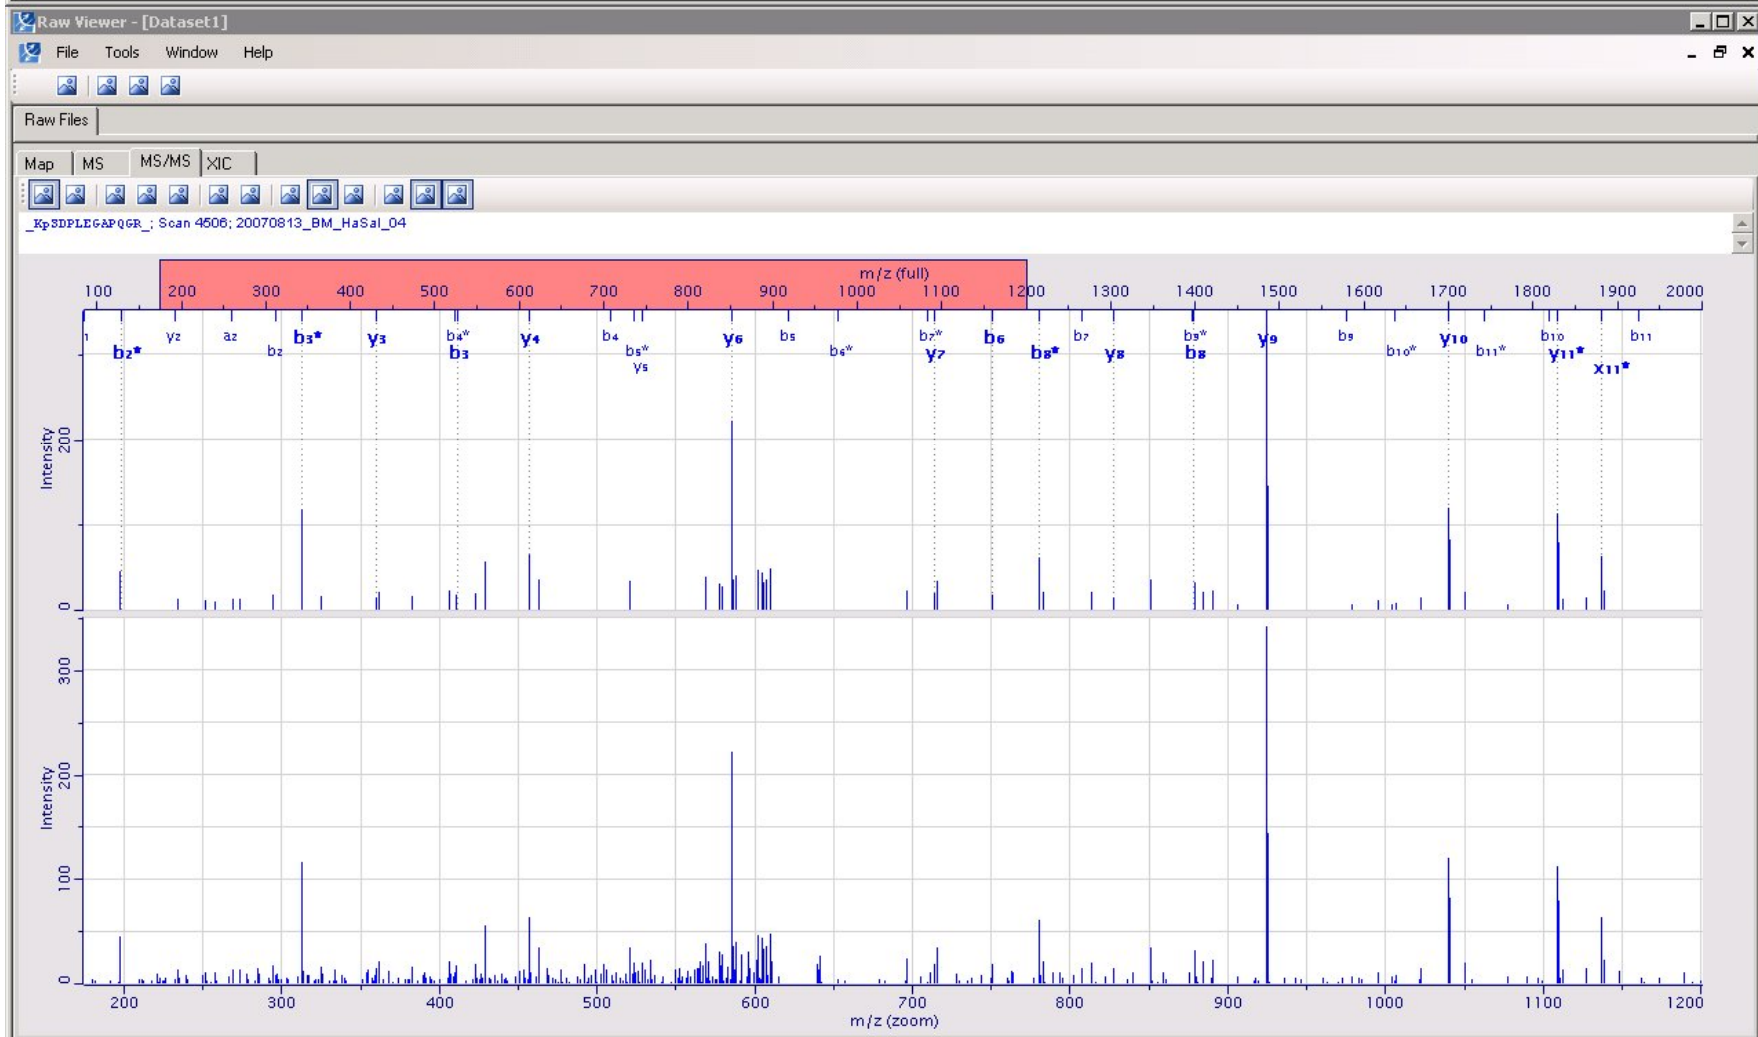

| Sequence  | Modifications            | Mass      | Mass Error [ppm] | Mass Fractional Part | Protein Groups | Proteins | Unique (Groups) | Unique (Protein) | Oxidatic (M) | phosph | N-Acety (Protein) | Slice Average | Slice Std. Dev. | Slice 1 | Slice 2 | Slice 3 |
|-----------|--------------------------|-----------|------------------|----------------------|----------------|----------|-----------------|------------------|--------------|--------|-------------------|---------------|-----------------|---------|---------|---------|
| KGSMGFSPR | Oxidation (M), phosph... | 1061.4365 | 0.039815         | 0.43654236           | 608            | DE3388F  | yes             | yes              | 1            | 1      | 0                 | 4             | 1.41            |         |         | 2       |

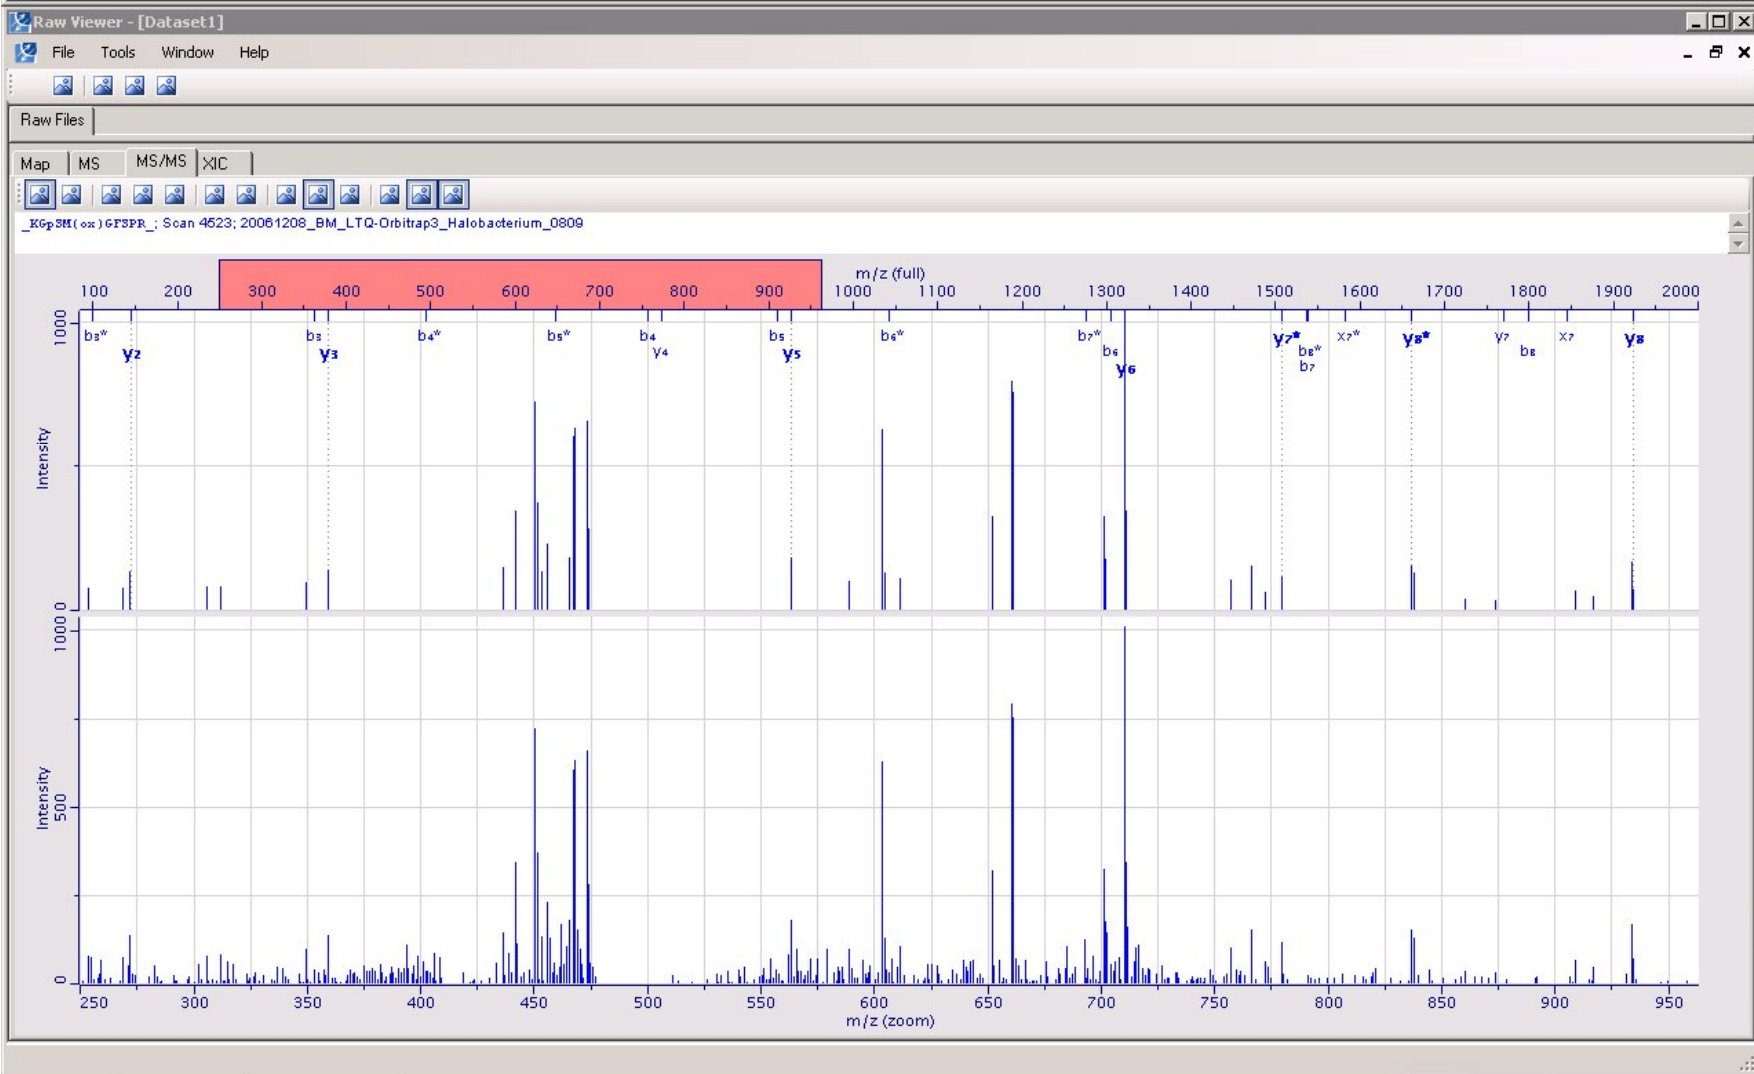

**Result Explorer**

Summary | Identifications | Modifications | All Peptides | MS Scans | MS/MS Scans | All Proteins

Protein Groups | Peptides | Modification-Specific Peptides | Evidence | MS/MS

|      | Sequence | Modifications | Mass    | Mass Error [ppm] | Mass Fractional Part | Protein Groups | Proteins | Unique (Groups) | Unique (Protein) | Oxidatic (M) | phosph | N-Acety (Protein) | Slice Average | Slice Std. Dev. | Slice 1 | Slice 2 | Slice 3 |
|------|----------|---------------|---------|------------------|----------------------|----------------|----------|-----------------|------------------|--------------|--------|-------------------|---------------|-----------------|---------|---------|---------|
| ▶ 54 | KFASDIGR | phospho(STY)  | 972.443 | 0.32311          | 0.44299717           | 248            | OE2097F  | yes             | yes              | 0            | 1      | 0                 | 3             | 0               |         |         | 1       |

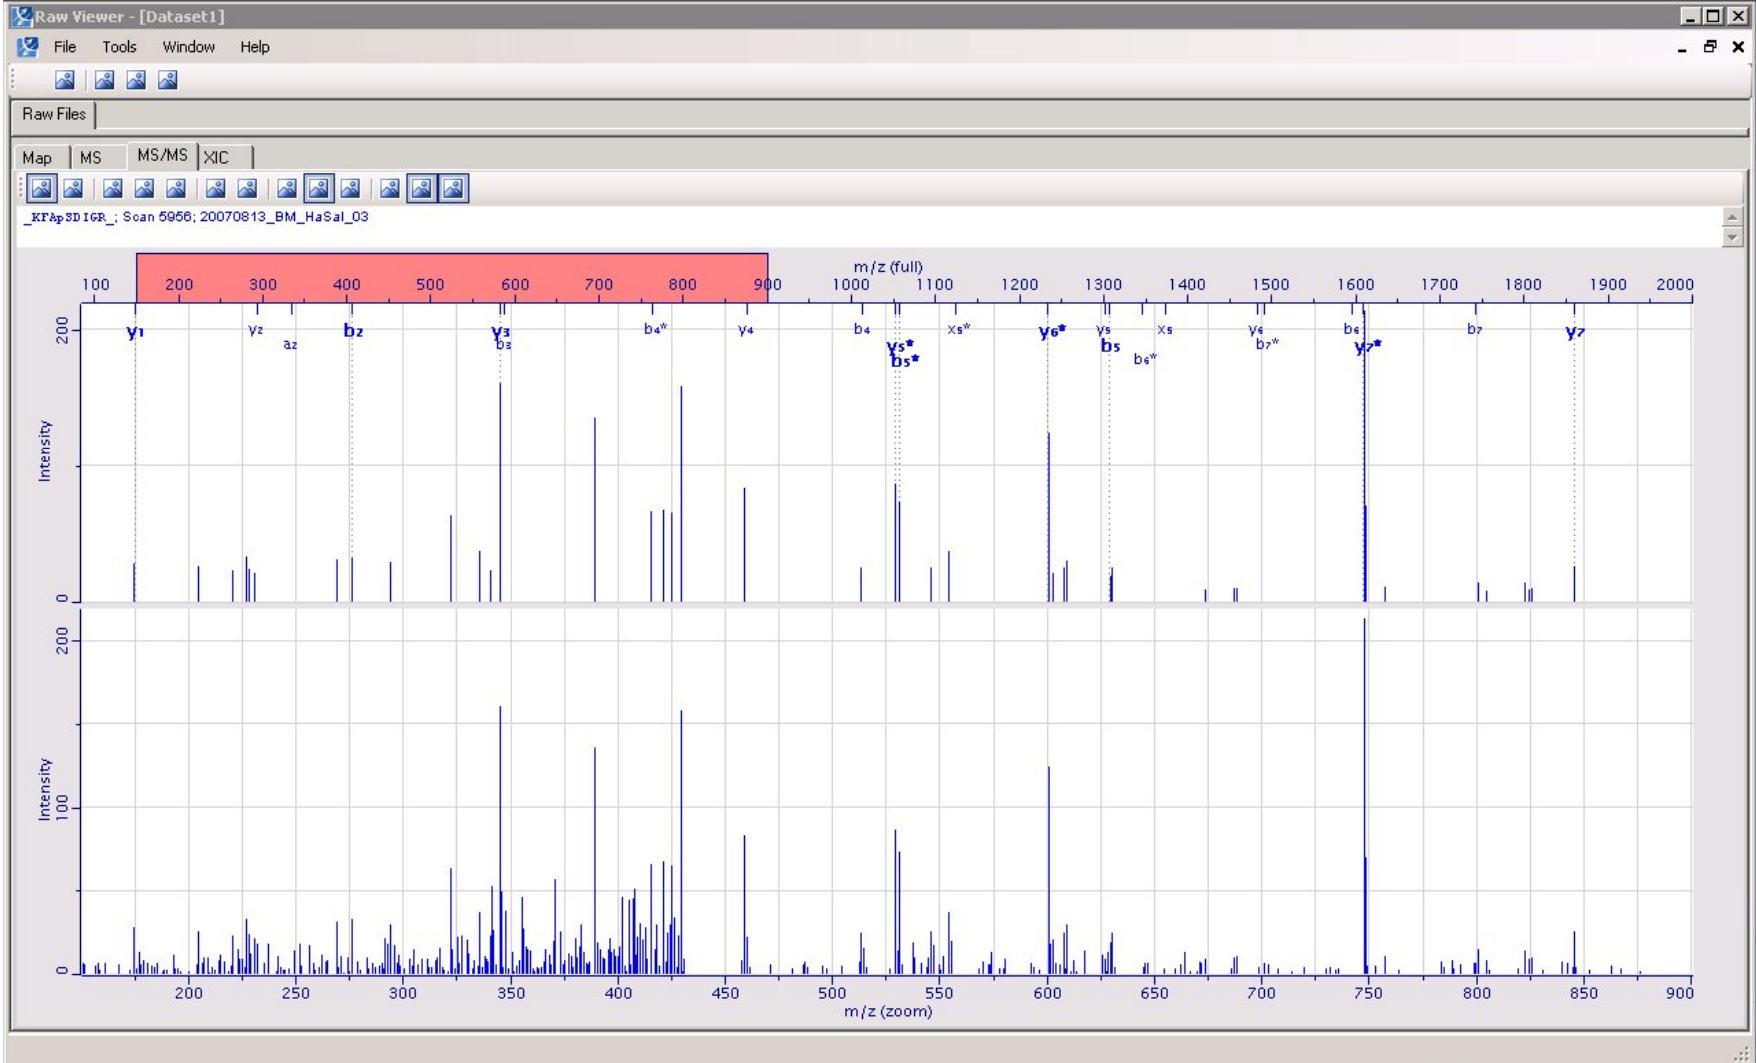

| Result Explorer                                                                                  |                       |               |           |                  |                      |                |          |                 |                  |              |        |                   |               |                 |         |         |         |
|--------------------------------------------------------------------------------------------------|-----------------------|---------------|-----------|------------------|----------------------|----------------|----------|-----------------|------------------|--------------|--------|-------------------|---------------|-----------------|---------|---------|---------|
| Summary   Identifications   Modifications   All Peptides   MS Scans   MS/MS Scans   All Proteins |                       |               |           |                  |                      |                |          |                 |                  |              |        |                   |               |                 |         |         |         |
| Protein Groups   Peptides   Modification-Specific Peptides   Evidence   MS/MS                    |                       |               |           |                  |                      |                |          |                 |                  |              |        |                   |               |                 |         |         |         |
|                                                                                                  | Sequence              | Modifications | Mass      | Mass Error [ppm] | Mass Fractional Part | Protein Groups | Proteins | Unique (Groups) | Unique (Protein) | Oxidatic (M) | phosph | N-Acety (Protein) | Slice Average | Slice Std. Dev. | Slice 1 | Slice 2 | Slice 3 |
| ▶ 55                                                                                             | IGAIVSADAGLPTGYPAVIAR | phospho(STY)  | 1994.0238 | -0.08104         | 0.0237934...         | 84             | DE1495R  | yes             | yes              | 0            | 1      | 0                 | 9             | 0               |         |         |         |

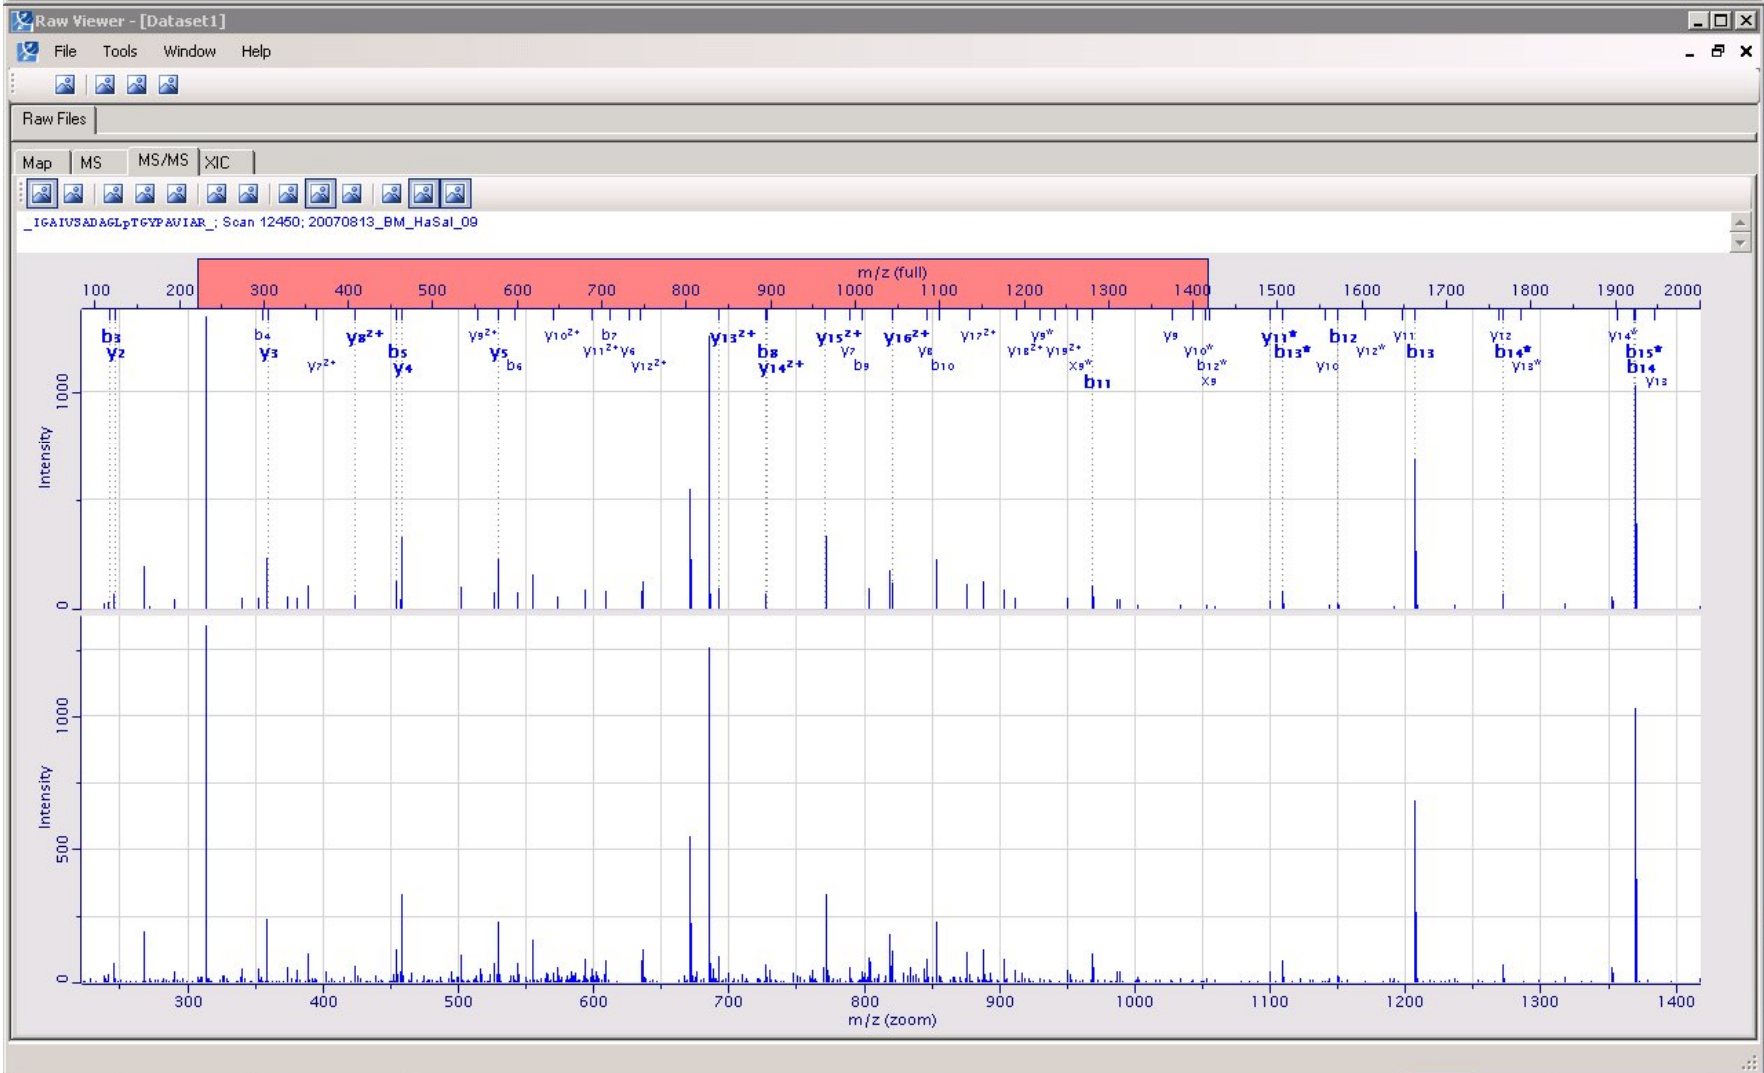

| Result Explorer                                                                                  |             |               |          |                  |                      |                |          |                 |                  |               |        |                   |               |                 |         |         |         |
|--------------------------------------------------------------------------------------------------|-------------|---------------|----------|------------------|----------------------|----------------|----------|-----------------|------------------|---------------|--------|-------------------|---------------|-----------------|---------|---------|---------|
| Summary   Identifications   Modifications   All Peptides   MS Scans   MS/MS Scans   All Proteins |             |               |          |                  |                      |                |          |                 |                  |               |        |                   |               |                 |         |         |         |
| Protein Groups   Peptides   Modification-Specific Peptides   Evidence   MS/MS                    |             |               |          |                  |                      |                |          |                 |                  |               |        |                   |               |                 |         |         |         |
|                                                                                                  | Sequence    | Modifications | Mass     | Mass Error [ppm] | Mass Fractional Part | Protein Groups | Proteins | Unique (Groups) | Unique (Protein) | Oxidative (M) | phosph | N-Acety (Protein) | Slice Average | Slice Std. Dev. | Slice 1 | Slice 2 | Slice 3 |
| ▶ 55                                                                                             | IEEHAESQGIR | phospho(STY)  | 1347.582 | -0.12935         | 0.58200985           | 624            | OE3412F  | yes             | yes              | 0             | 1      | 0                 | 4             | 0               |         |         |         |

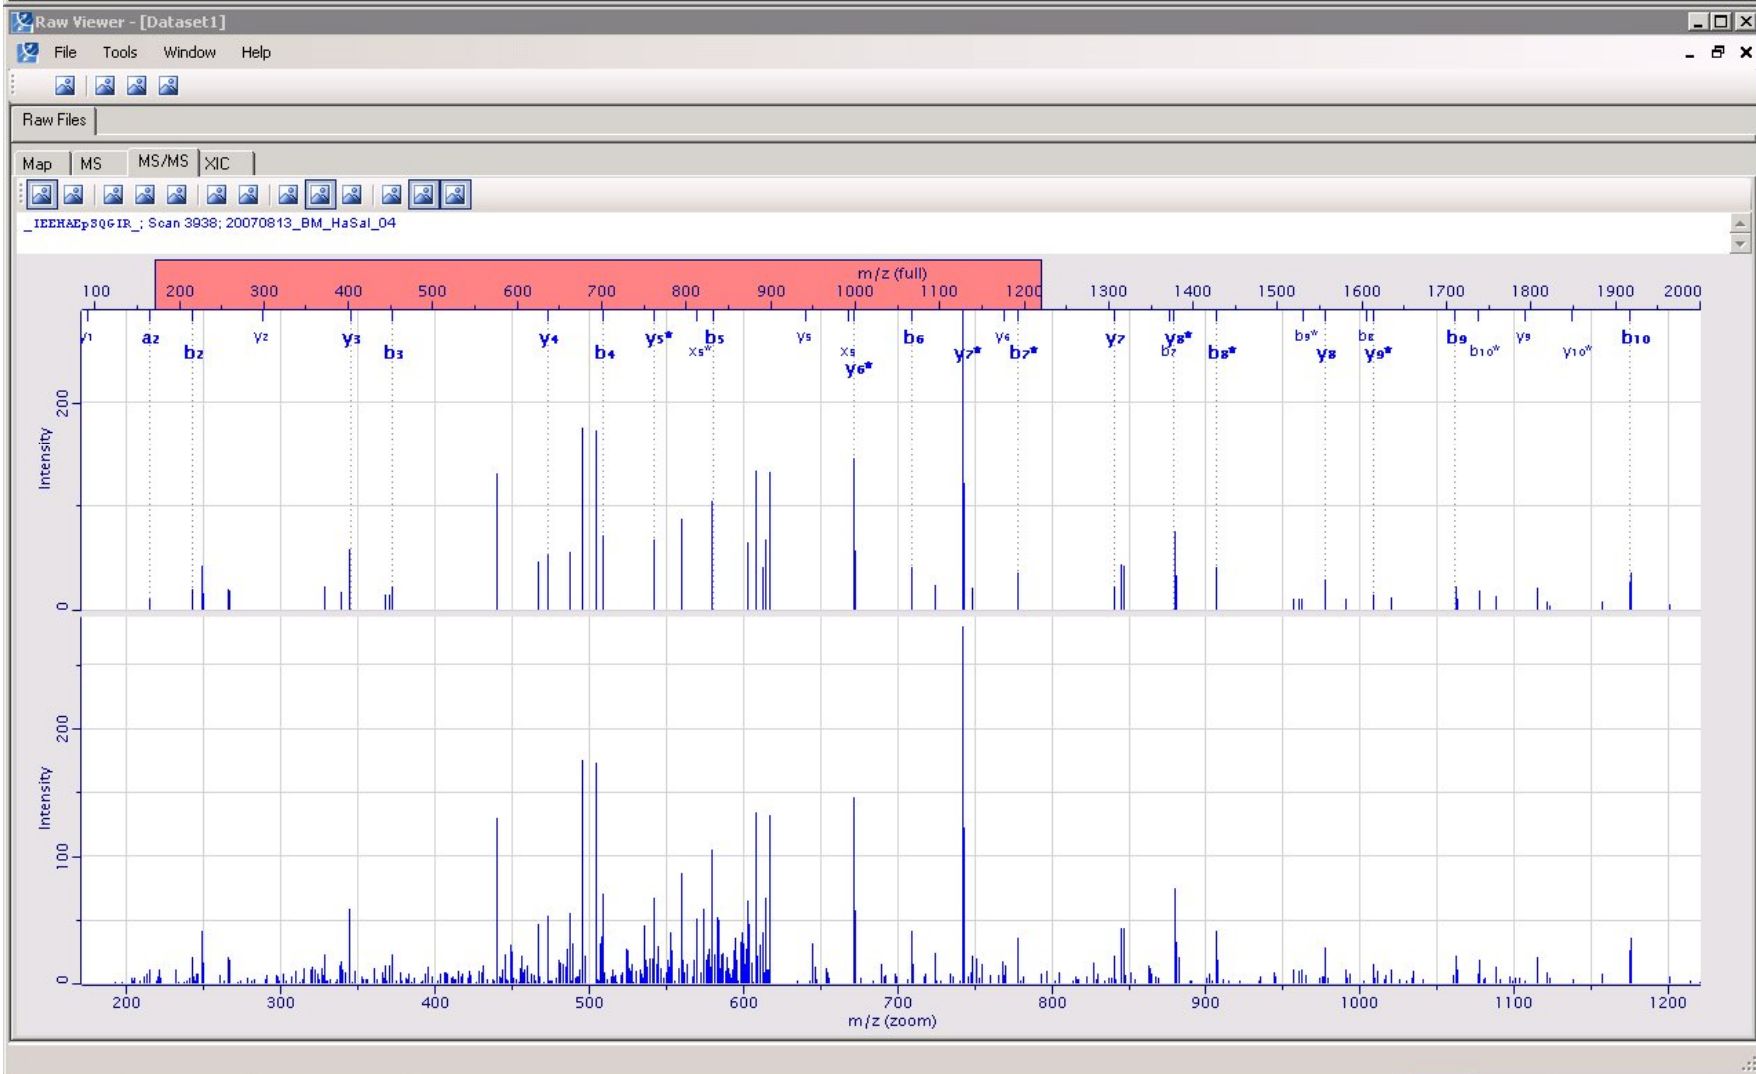



| Result Explorer                                                                                  |                     |               |           |                  |                      |                |          |                 |                  |              |        |                   |               |                 |         |         |         |
|--------------------------------------------------------------------------------------------------|---------------------|---------------|-----------|------------------|----------------------|----------------|----------|-----------------|------------------|--------------|--------|-------------------|---------------|-----------------|---------|---------|---------|
| Summary   Identifications   Modifications   All Peptides   MS Scans   MS/MS Scans   All Proteins |                     |               |           |                  |                      |                |          |                 |                  |              |        |                   |               |                 |         |         |         |
| Protein Groups   Peptides   Modification-Specific Peptides   Evidence   MS/MS                    |                     |               |           |                  |                      |                |          |                 |                  |              |        |                   |               |                 |         |         |         |
|                                                                                                  | Sequence            | Modifications | Mass      | Mass Error [ppm] | Mass Fractional Part | Protein Groups | Proteins | Unique (Groups) | Unique (Protein) | Oxidatic (M) | phosph | N-Acety (Protein) | Slice Average | Slice Std. Dev. | Slice 1 | Slice 2 | Slice 3 |
| ▶ 57                                                                                             | IEDVTIPHDGTRPPKNSGY | phospho(STY)  | 2272.0525 | -0.22509         | 0.0525274...         | 405            | OE2629F  | yes             | yes              | 0            | 1      | 0                 | 4.5           | 1.5             |         |         | 1       |

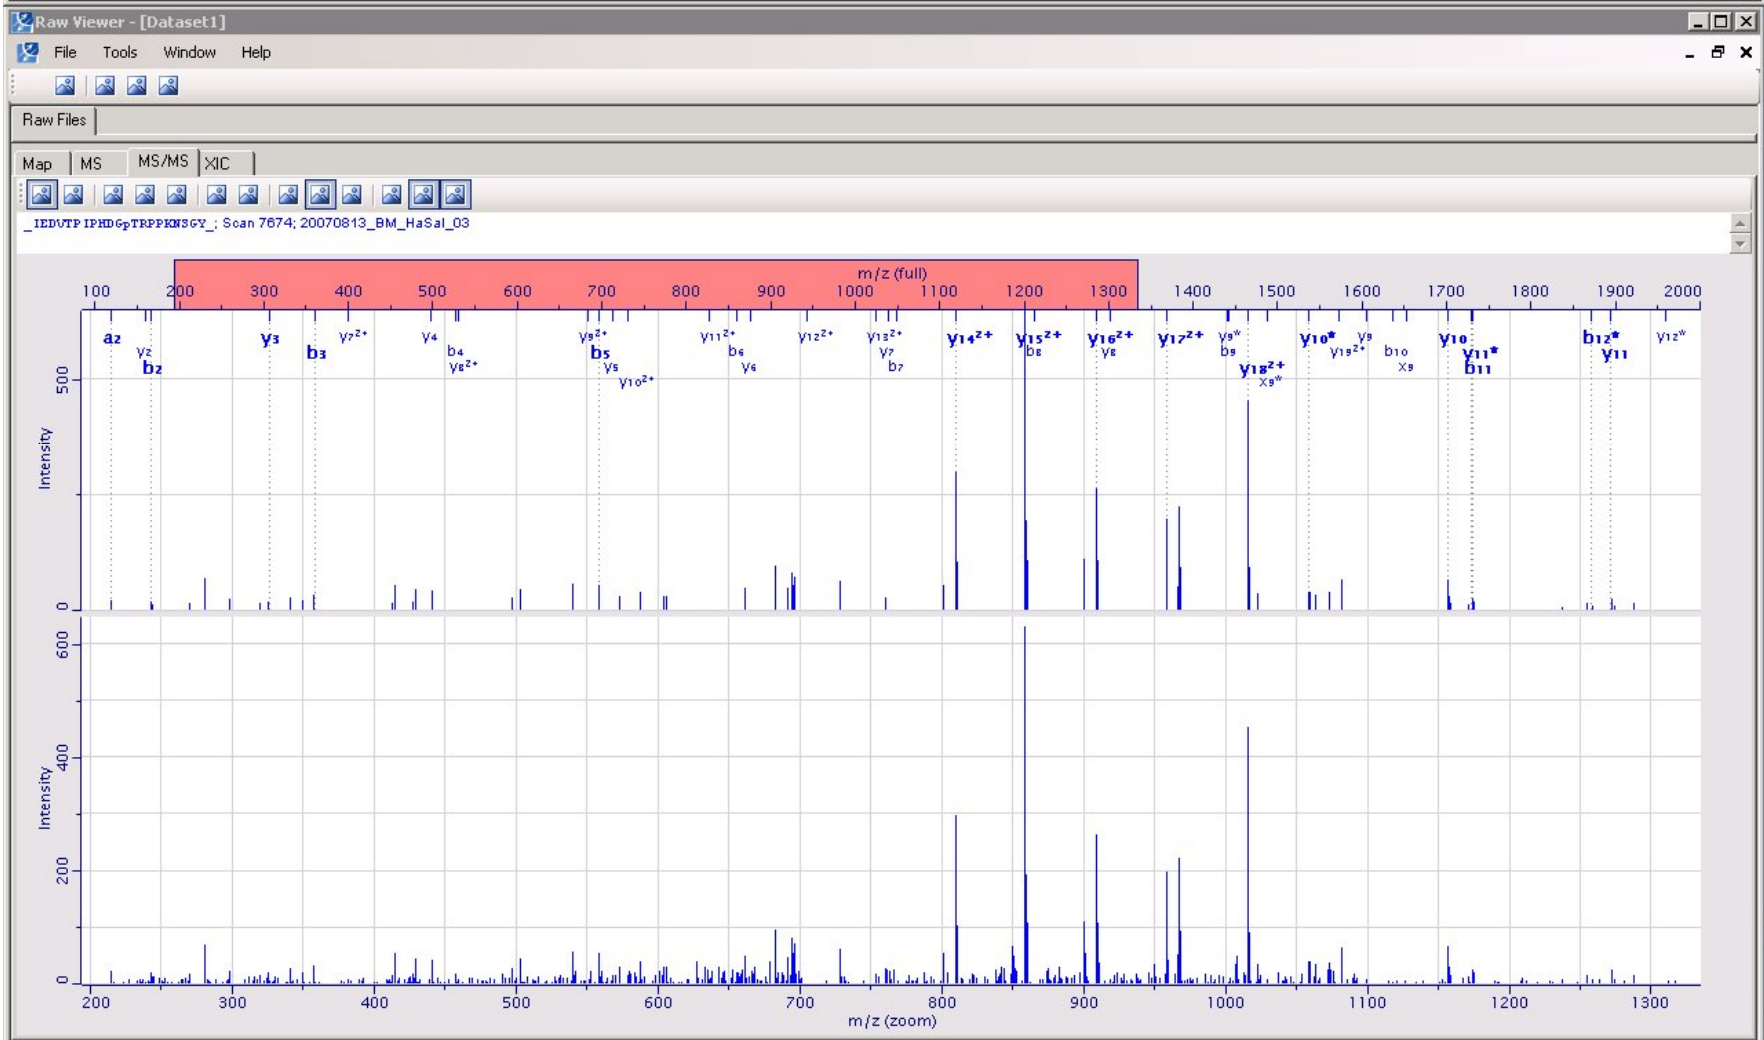

Result Explorer

Summary | Identifications | Modifications | All Peptides | MS Scans | MS/MS Scans | All Proteins

Protein Groups | Peptides | Modification-Specific Peptides | Evidence | MS/MS

|    | Sequence           | Modifications            | Mass      | Mass Error [ppm] | Mass Fractional Part | Protein Groups | Proteins | Unique (Groups) | Unique (Protein) | Oxidatic (M) | phosph | N-Acety (Protein) | Slice Average | Slice Std. Dev. | Slice 1 | Slice 2 | Slice 3 |
|----|--------------------|--------------------------|-----------|------------------|----------------------|----------------|----------|-----------------|------------------|--------------|--------|-------------------|---------------|-----------------|---------|---------|---------|
| 58 | IDVPSEHMGAASGEVQGR | Oxidation (M), phosph... | 1934.8194 | -0.69153         | 0.81936713           | 994            | DE4729R  | yes             | yes              | 1            | 1      | 0                 | 6             | 0               |         |         |         |

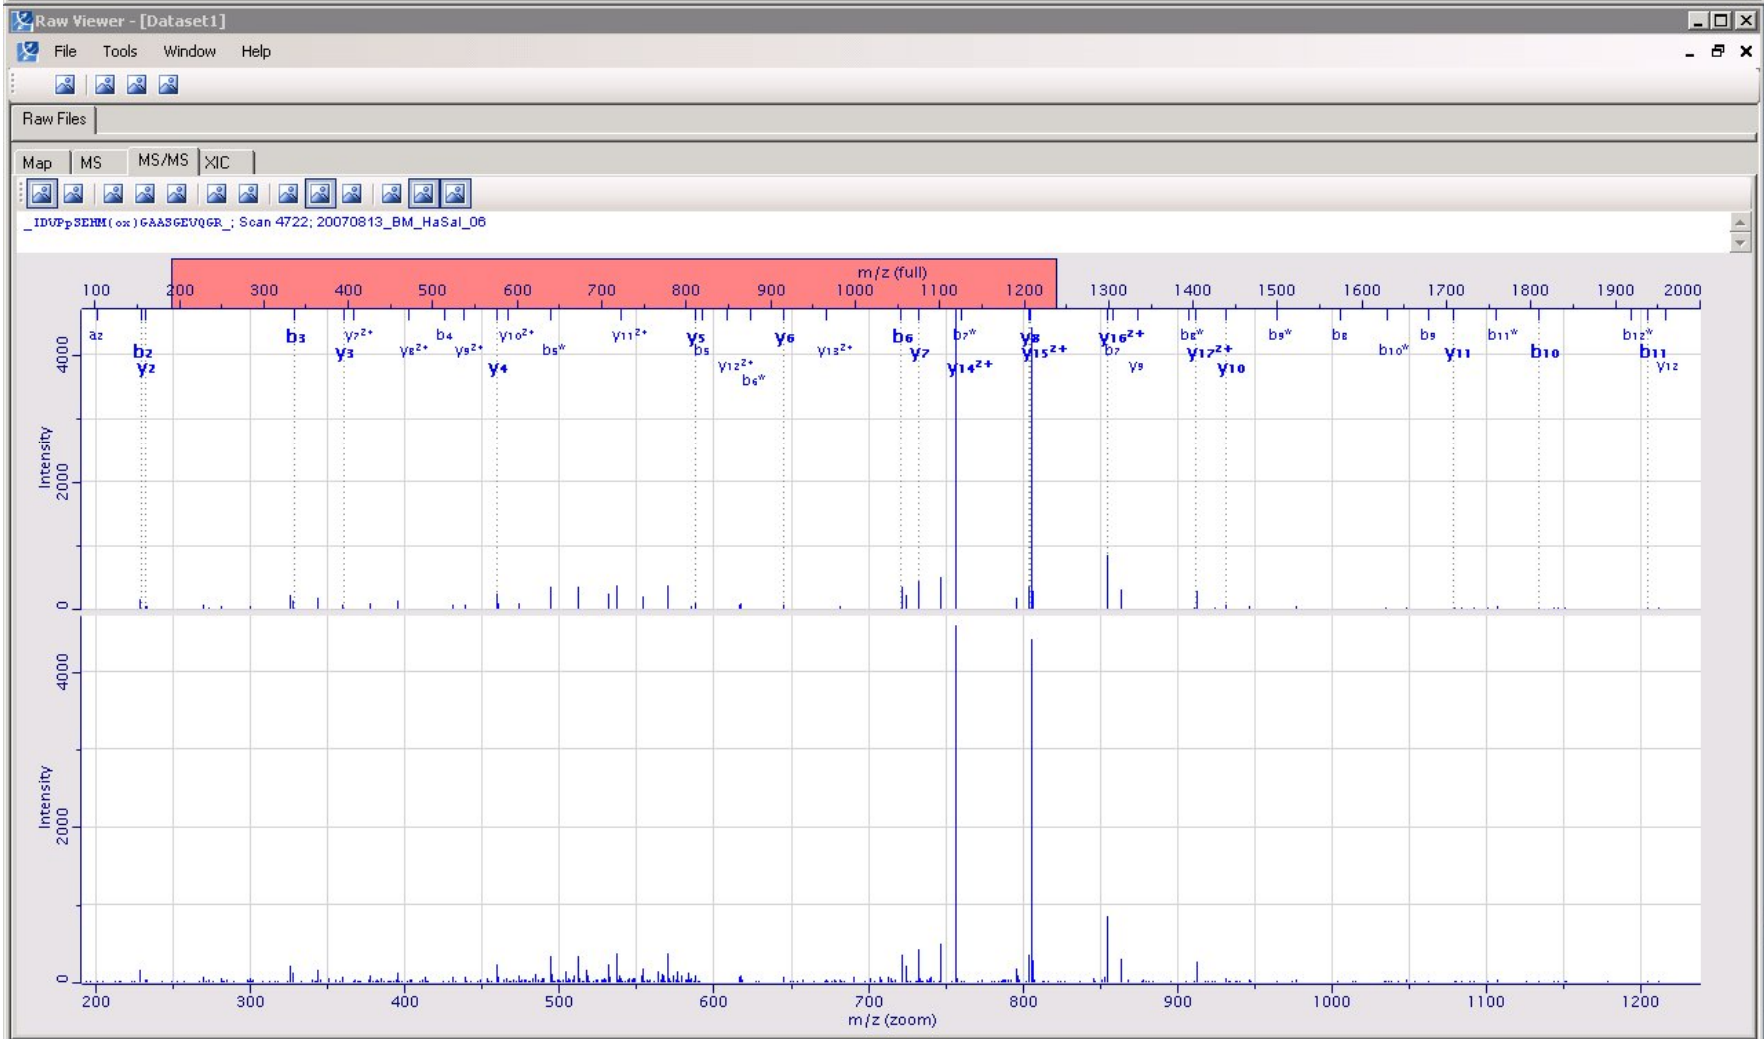

**Result Explorer**

Summary | Identifications | Modifications | All Peptides | MS Scans | MS/MS Scans | All Proteins

Protein Groups | Peptides | **Modification-Specific Peptides** | Evidence | MS/MS

|      | Sequence    | Modifications | Mass      | Mass Error [ppm] | Mass Fractional Part | Protein Groups | Proteins | Unique (Groups) | Unique (Protein) | Oxidatic (M) | phosph | N-Acety (Protein) | Slice Average | Slice Std. Dev. | Slice 1 | Slice 2 | Slice 3 |
|------|-------------|---------------|-----------|------------------|----------------------|----------------|----------|-----------------|------------------|--------------|--------|-------------------|---------------|-----------------|---------|---------|---------|
| ▶ 59 | IAKSEVGGALR | phospho(STY)  | 1179.6013 | 0.0466           | 0.60128873           | 300            | OE2294R  | yes             | yes              | 0            | 1      | 0                 | 4             | 0               |         |         |         |

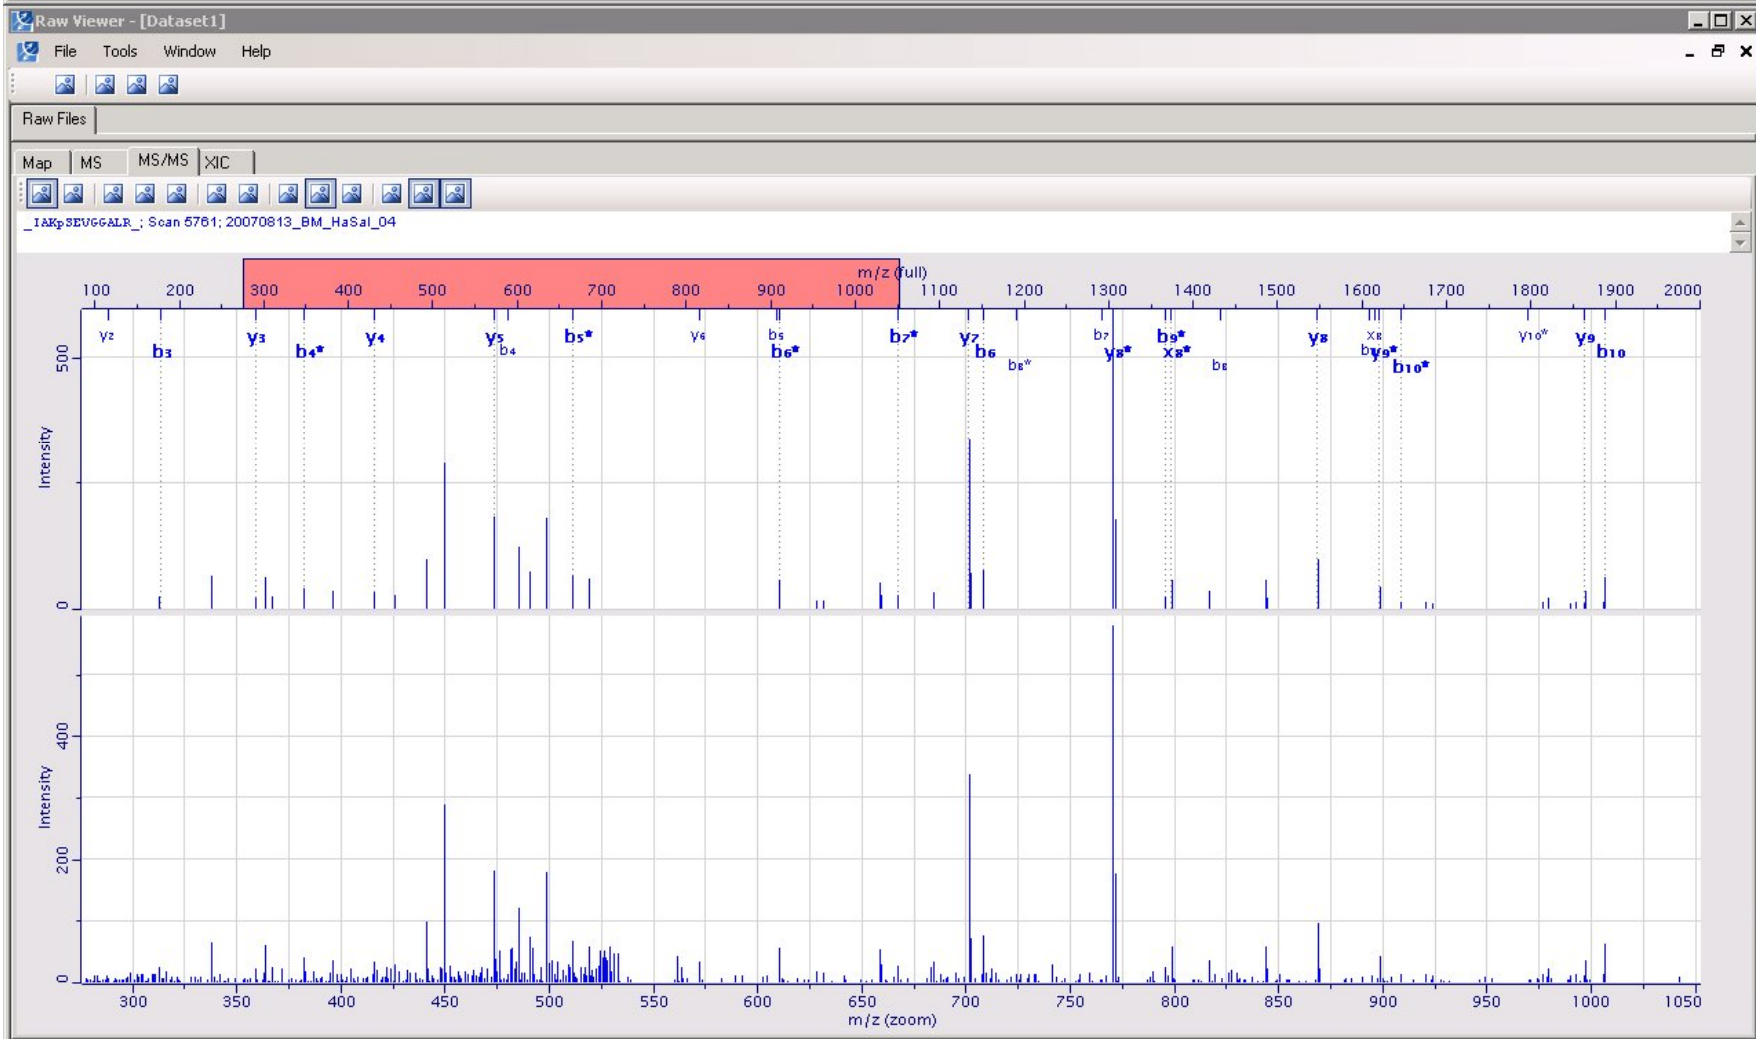

| Result Explorer                                                                                  |                             |               |           |                  |                      |                |          |                 |                  |              |        |                   |               |                 |         |         |         |
|--------------------------------------------------------------------------------------------------|-----------------------------|---------------|-----------|------------------|----------------------|----------------|----------|-----------------|------------------|--------------|--------|-------------------|---------------|-----------------|---------|---------|---------|
| Summary   Identifications   Modifications   All Peptides   MS Scans   MS/MS Scans   All Proteins |                             |               |           |                  |                      |                |          |                 |                  |              |        |                   |               |                 |         |         |         |
| Protein Groups   Peptides   Modification-Specific Peptides   Evidence   MS/MS                    |                             |               |           |                  |                      |                |          |                 |                  |              |        |                   |               |                 |         |         |         |
|                                                                                                  | Sequence                    | Modifications | Mass      | Mass Error [ppm] | Mass Fractional Part | Protein Groups | Proteins | Unique (Groups) | Unique (Protein) | Oxidatic (M) | phosph | N-Acety (Protein) | Slice Average | Slice Std. Dev. | Slice 1 | Slice 2 | Slice 3 |
| ▶ 60                                                                                             | HQPQLMGSDSQPIRSESVADAPQP... | phospho(STY)  | 3995.8208 | 0.016582         | 0.82081951           | 658            | QE3542R  | yes             | yes              | 0            | 1      | 0                 | 5             | 0               |         |         |         |

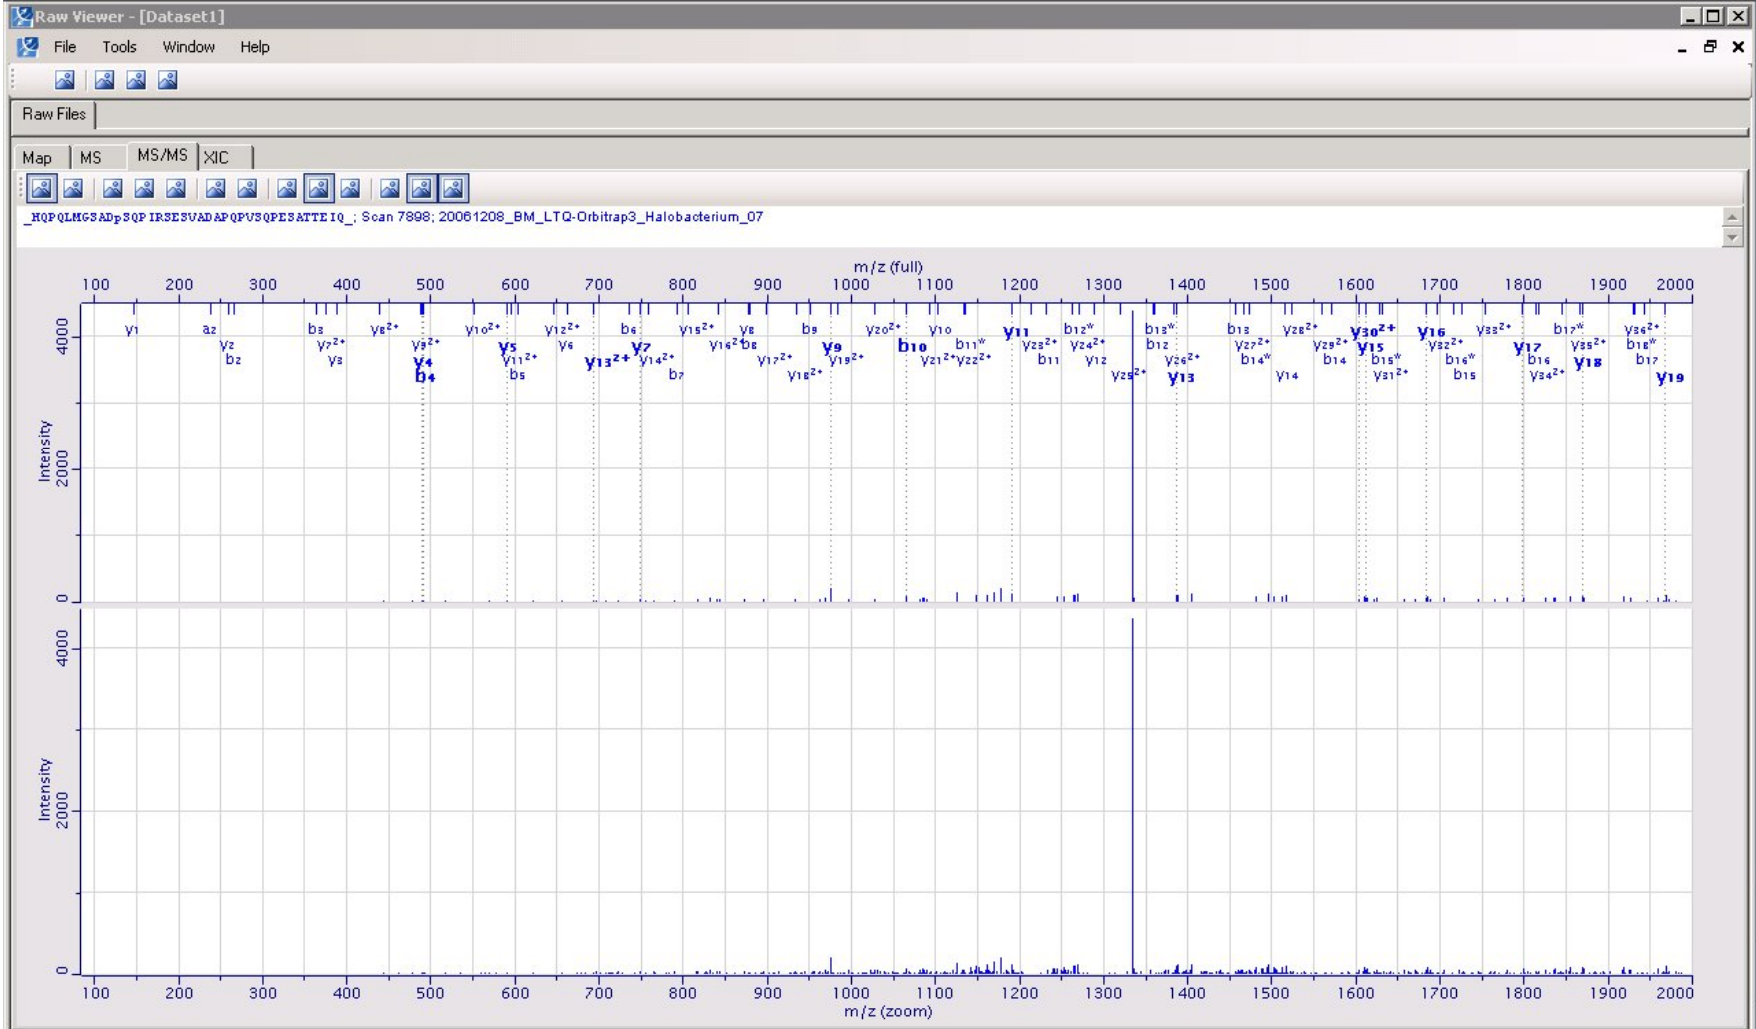

| Result Explorer                                                                                  |                  |               |           |                  |                      |                |          |                 |                  |              |        |                   |               |                 |         |         |         |
|--------------------------------------------------------------------------------------------------|------------------|---------------|-----------|------------------|----------------------|----------------|----------|-----------------|------------------|--------------|--------|-------------------|---------------|-----------------|---------|---------|---------|
| Summary   Identifications   Modifications   All Peptides   MS Scans   MS/MS Scans   All Proteins |                  |               |           |                  |                      |                |          |                 |                  |              |        |                   |               |                 |         |         |         |
| Protein Groups   Peptides   Modification-Specific Peptides   Evidence   MS/MS                    |                  |               |           |                  |                      |                |          |                 |                  |              |        |                   |               |                 |         |         |         |
|                                                                                                  | Sequence         | Modifications | Mass      | Mass Error [ppm] | Mass Fractional Part | Protein Groups | Proteins | Unique (Groups) | Unique (Protein) | Oxidatic (M) | phosph | N-Acety (Protein) | Slice Average | Slice Std. Dev. | Slice 1 | Slice 2 | Slice 3 |
| ▶ 61                                                                                             | HQPQLMGSADSPQPIR | phospho(STY)  | 1743.7764 | 0.084108         | 0.77636934           | 658            | OE3542R  | yes             | yes              | 0            | 1      | 0                 | 4             | 0               |         |         |         |

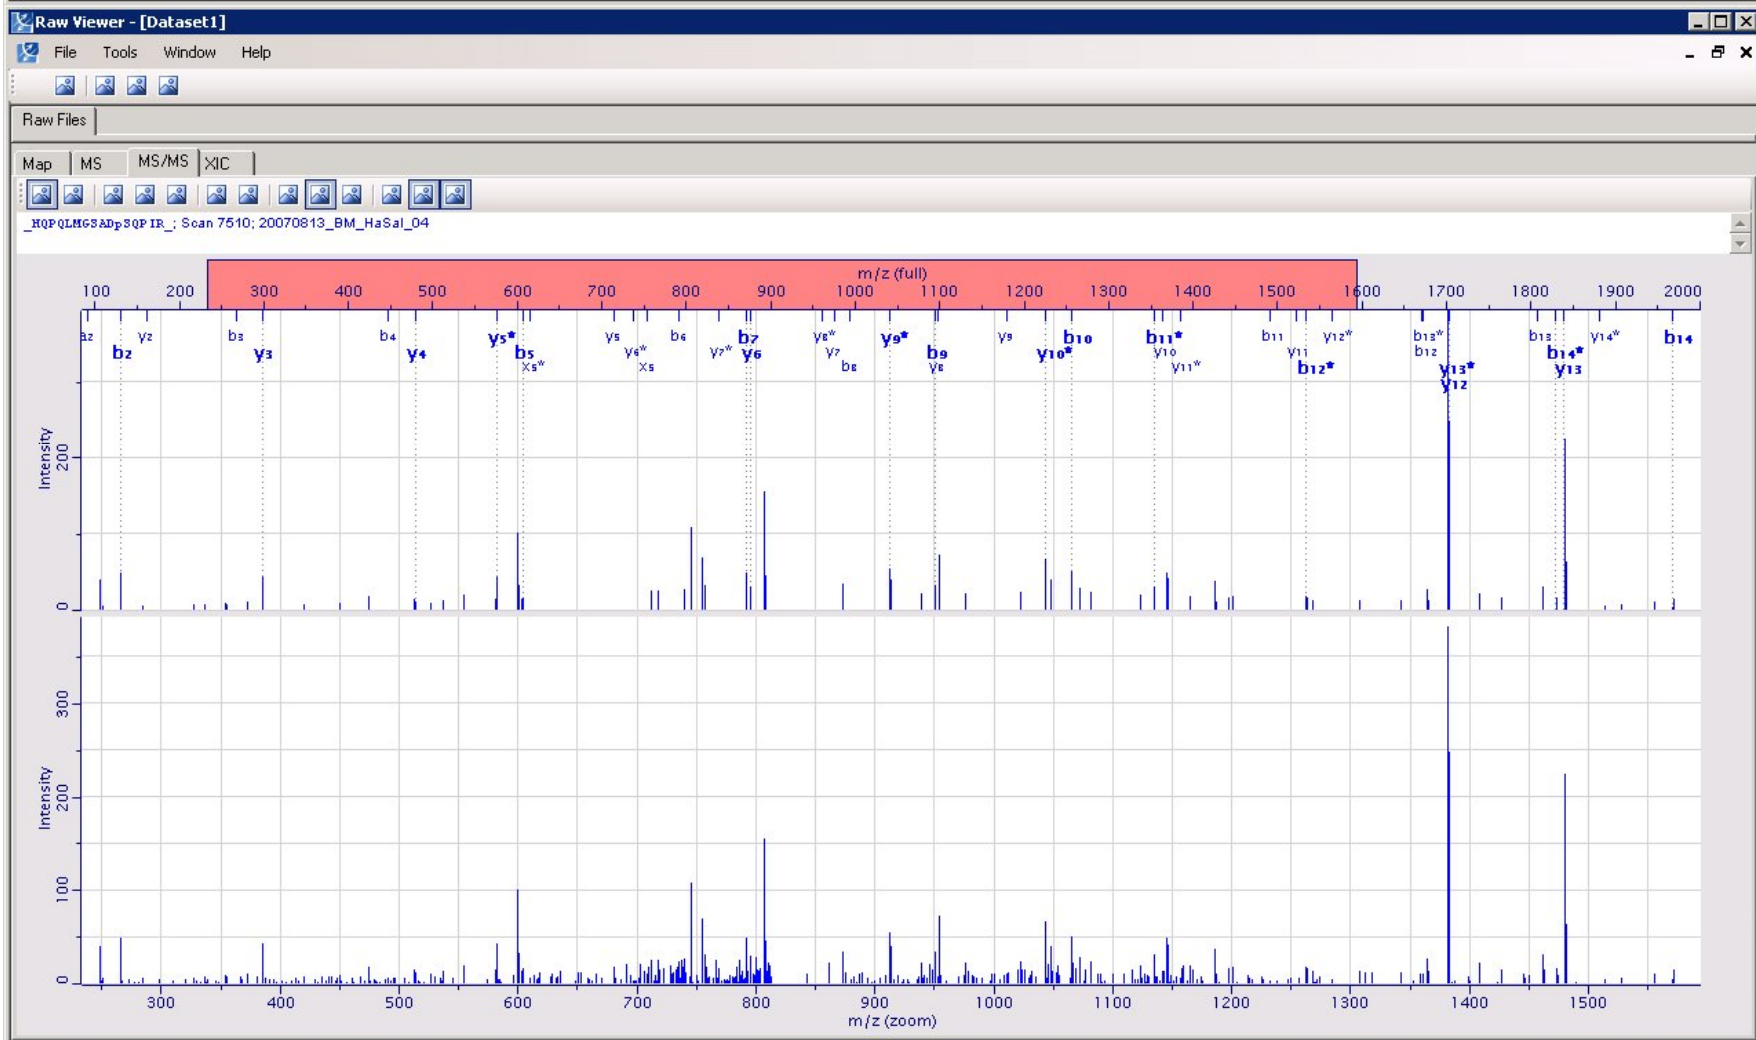



| Result Explorer                                                                                  |                                     |               |           |                  |                      |                |          |                 |                  |              |        |                   |               |                 |         |
|--------------------------------------------------------------------------------------------------|-------------------------------------|---------------|-----------|------------------|----------------------|----------------|----------|-----------------|------------------|--------------|--------|-------------------|---------------|-----------------|---------|
| Summary   Identifications   Modifications   All Peptides   MS Scans   MS/MS Scans   All Proteins |                                     |               |           |                  |                      |                |          |                 |                  |              |        |                   |               |                 |         |
| Protein Groups   Peptides   Modification-Specific Peptides   Evidence   MS/MS                    |                                     |               |           |                  |                      |                |          |                 |                  |              |        |                   |               |                 |         |
|                                                                                                  | Sequence                            | Modifications | Mass      | Mass Error [ppm] | Mass Fractional Part | Protein Groups | Proteins | Unique (Groups) | Unique (Protein) | Oxidatic (M) | phosph | N-Acety (Protein) | Slice Average | Slice Std. Dev. | Slice 1 |
| ▶ 63                                                                                             | HGDADNTSTTSSASSSSSTSTGASSEPPVVEGEIR | phospho(STY)  | 3816.5719 | -0.73799         | 0.57191785           | 76             | OE1442R  | yes             | yes              | 0            | 1      | 0                 | 6             | 0               |         |

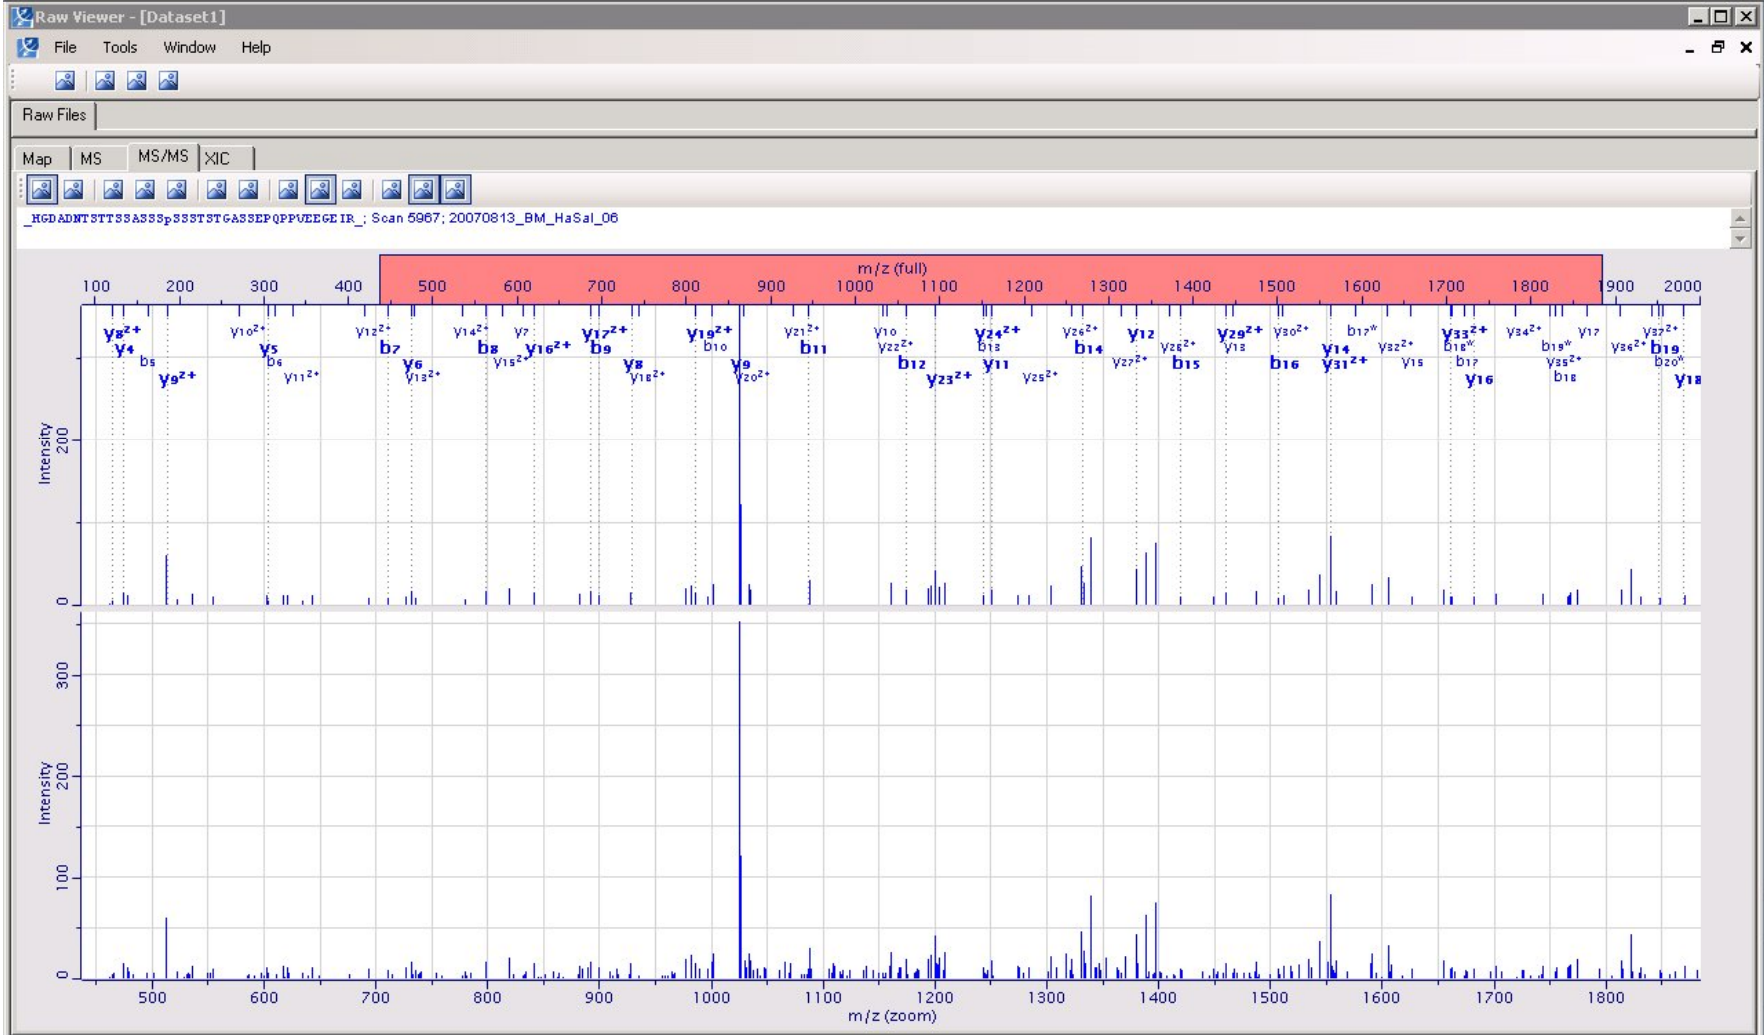

**Result Explorer**

Summary | Identifications | Modifications | All Peptides | MS Scans | MS/MS Scans | All Proteins

Protein Groups | Peptides | **Modification-Specific Peptides** | Evidence | MS/MS

|      | Sequence            | Modifications | Mass      | Mass Error [ppm] | Mass Fractional Part | Protein Groups | Proteins | Unique (Groups) | Unique (Protein) | Oxidatic (M) | phosph | N-Acety (Protein) | Slice Average | Slice Std. Dev. | Slice 1 |
|------|---------------------|---------------|-----------|------------------|----------------------|----------------|----------|-----------------|------------------|--------------|--------|-------------------|---------------|-----------------|---------|
| ▶ 64 | HDASLALPLPSETLETGDR | phospho(STY)  | 2100.9729 | -0.12106         | 0.97288012           | 701            | OE3710R  | yes             | yes              | 0            | 1      | 0                 | 5.33          | 0.471           |         |

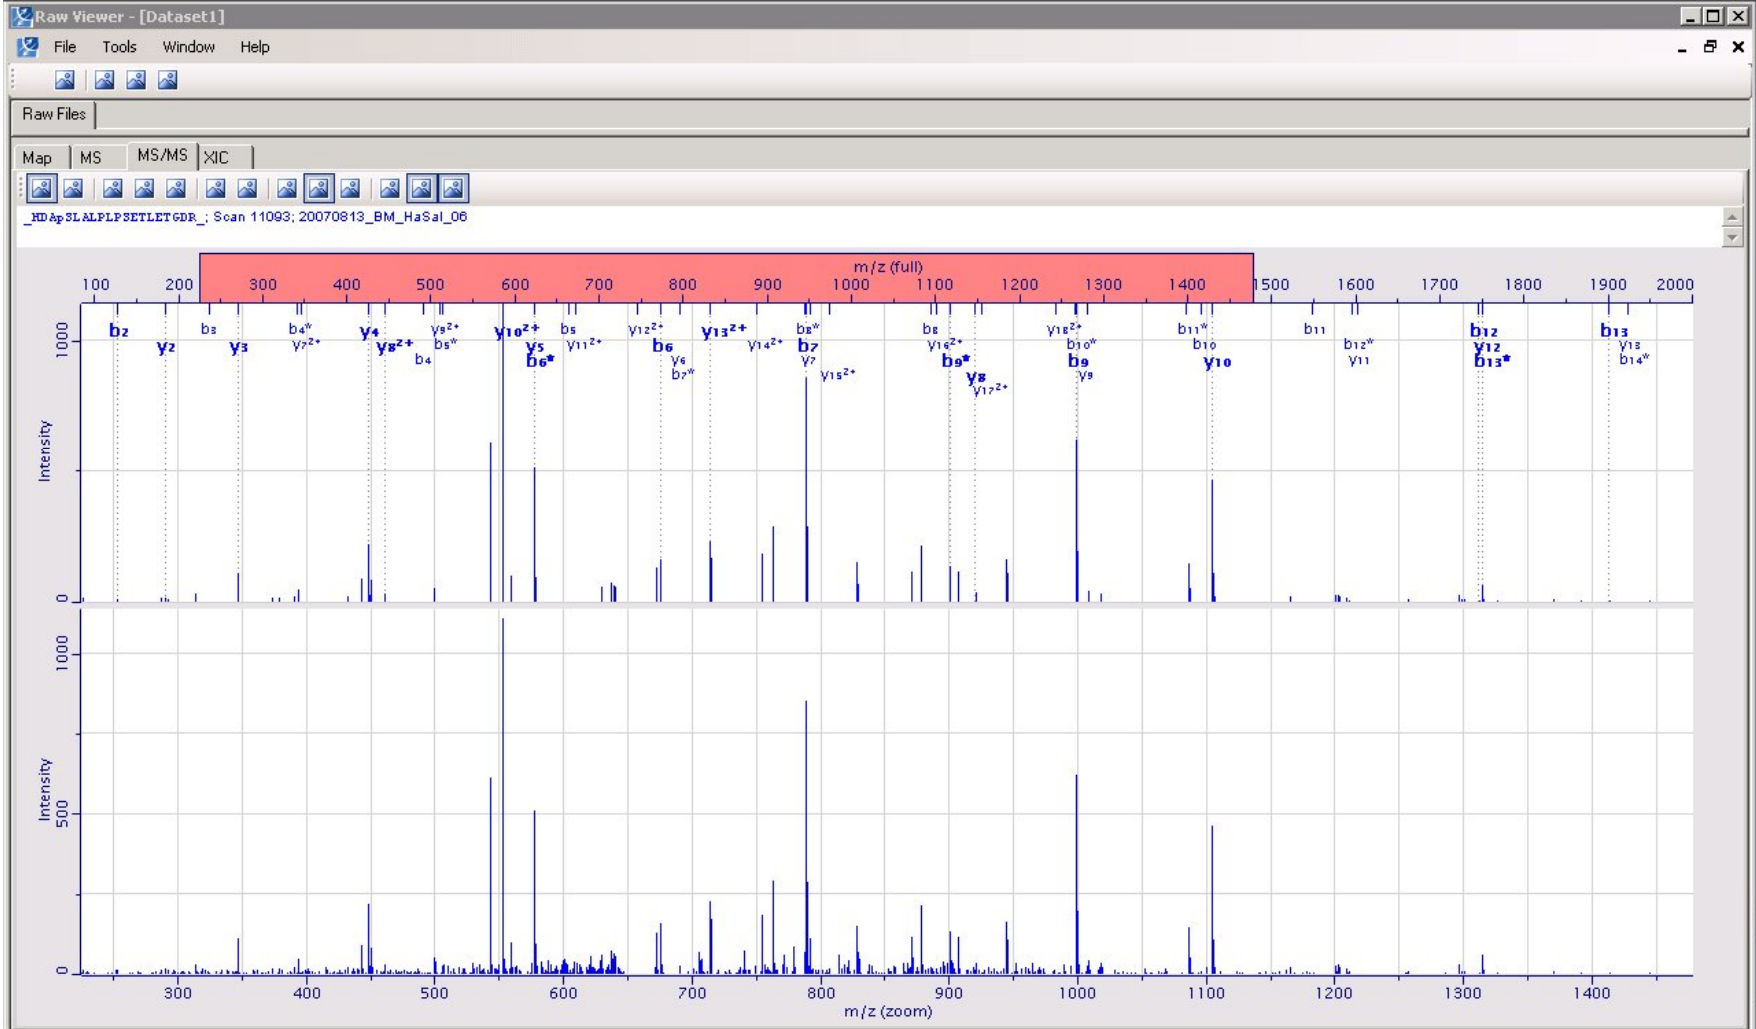



**Result Explorer**

Summary | Identifications | Modifications | All Peptides | MS Scans | MS/MS Scans | All Proteins

Protein Groups | Peptides | **Modification-Specific Peptides** | Evidence | MS/MS

|      | Sequence    | Modifications | Mass      | Mass Error [ppm] | Mass Fractional Part | Protein Groups | Proteins | Unique (Groups) | Unique (Protein) | Oxidatic (M) | phosph | N-Acety (Protein) | Slice Average | Slice Std. Dev. | Slice 1 |
|------|-------------|---------------|-----------|------------------|----------------------|----------------|----------|-----------------|------------------|--------------|--------|-------------------|---------------|-----------------|---------|
| ▶ 65 | HASSQIPTNAK | phospho(STY)  | 1232.5551 | 0.090758         | 0.55506682           | 774            | OE3959R  | yes             | yes              | 0            | 1      | 0                 | 4.4           | 1.02            |         |

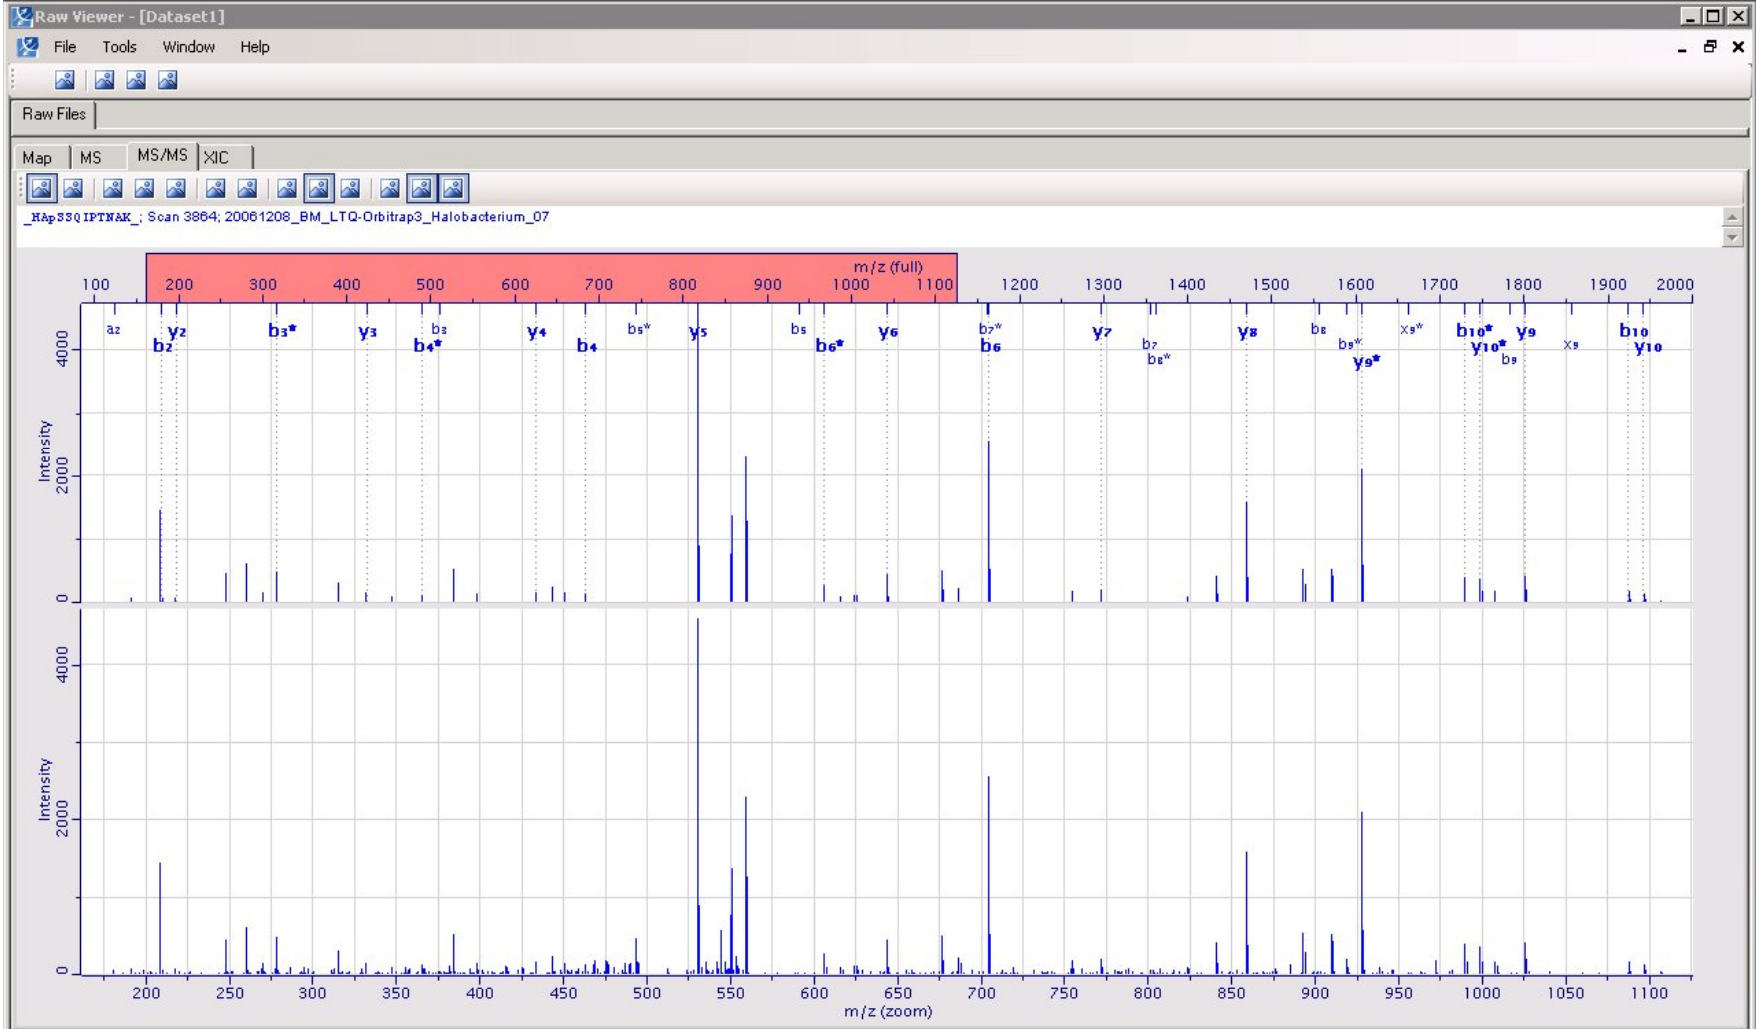

| Result Explorer                                                                                  |               |               |           |                  |                      |                |          |                 |                  |              |        |                   |               |                 |         |  |
|--------------------------------------------------------------------------------------------------|---------------|---------------|-----------|------------------|----------------------|----------------|----------|-----------------|------------------|--------------|--------|-------------------|---------------|-----------------|---------|--|
| Summary   Identifications   Modifications   All Peptides   MS Scans   MS/MS Scans   All Proteins |               |               |           |                  |                      |                |          |                 |                  |              |        |                   |               |                 |         |  |
| Protein Groups   Peptides   <b>Modification-Specific Peptides</b>   Evidence   MS/MS             |               |               |           |                  |                      |                |          |                 |                  |              |        |                   |               |                 |         |  |
|                                                                                                  | Sequence      | Modifications | Mass      | Mass Error [ppm] | Mass Fractional Part | Protein Groups | Proteins | Unique (Groups) | Unique (Protein) | Oxidatic (M) | phosph | N-Acety (Protein) | Slice Average | Slice Std. Dev. | Slice 1 |  |
| ▶ 66                                                                                             | HAGTSKVEGEPTA | phospho(STY)  | 1362.5817 | 0.48678          | 0.5816755            | 552            | OE3168R  | yes             | yes              | 0            | 1      | 0                 | 4             | 0               |         |  |

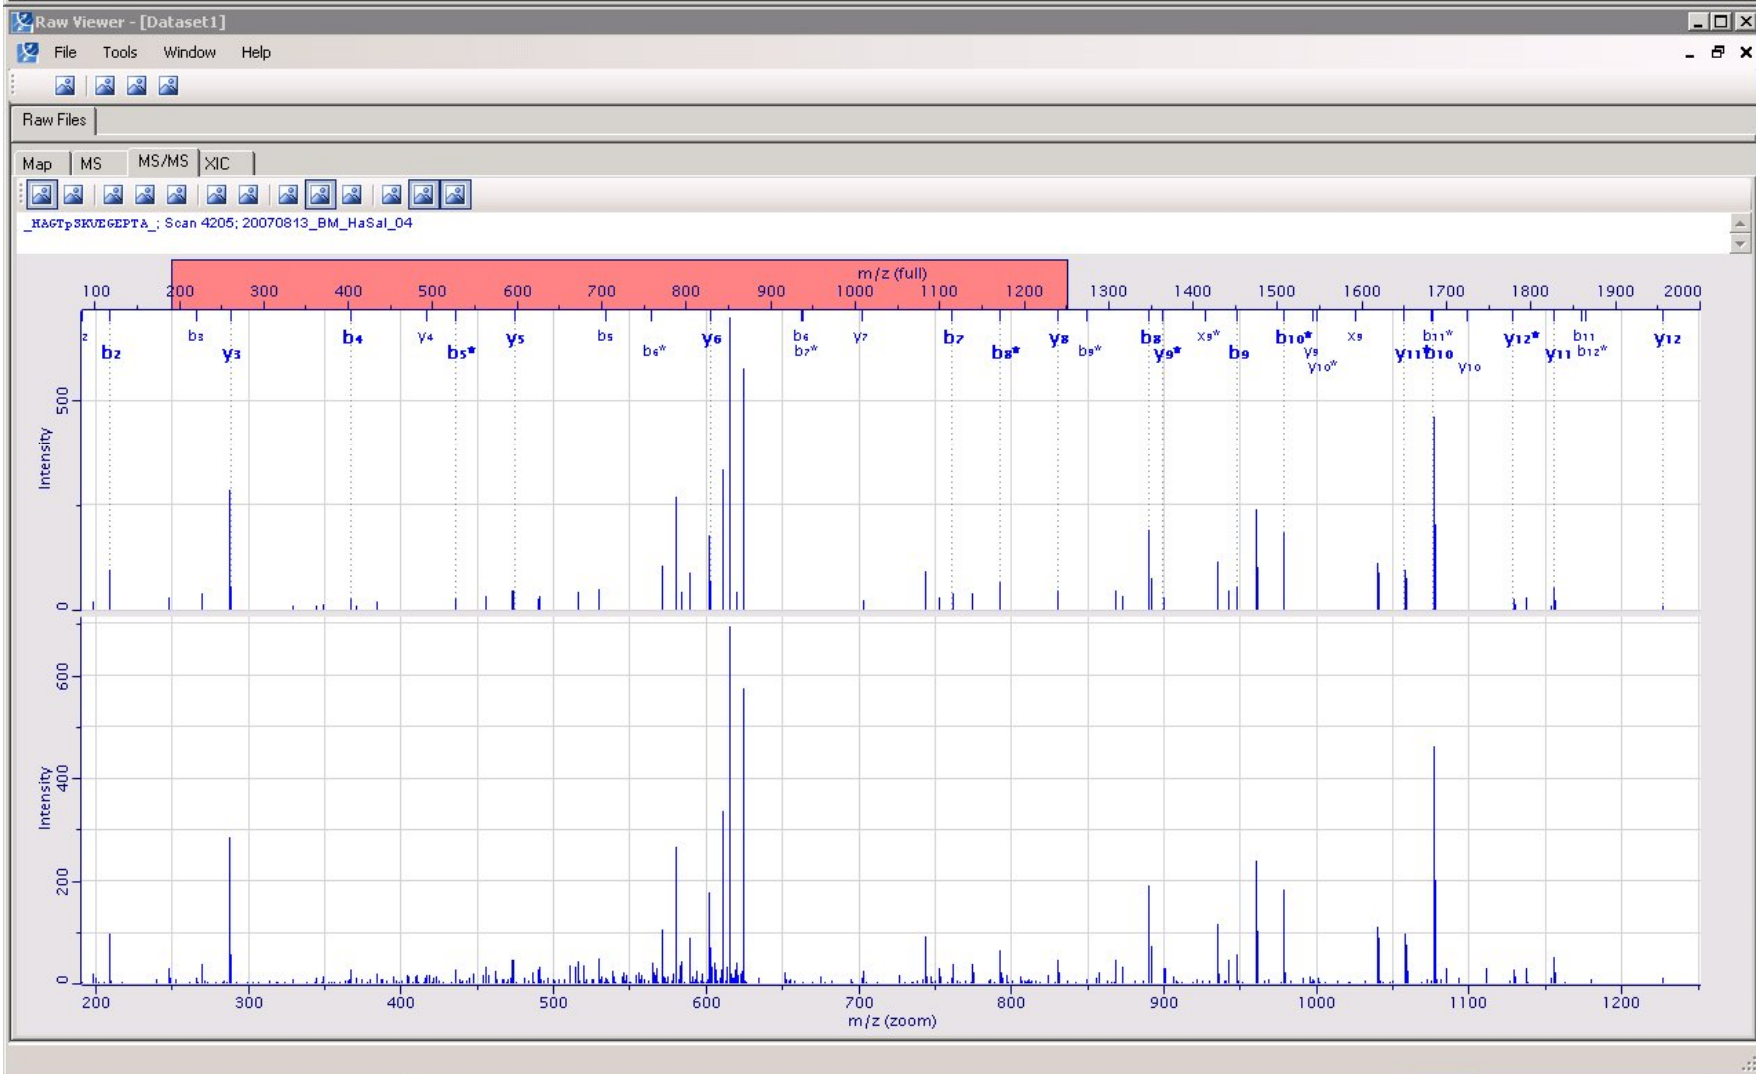



**Result Explorer**

Summary | Identifications | Modifications | All Peptides | MS Scans | MS/MS Scans | All Proteins

Protein Groups | Peptides | **Modification-Specific Peptides** | Evidence | MS/MS

|      | Sequence             | Modifications | Mass      | Mass Error [ppm] | Mass Fractional Part | Protein Groups | Proteins | Unique (Groups) | Unique (Protein) | Oxidatic (M) | phosph | N-Acety (Protein) | Slice Average | Slice Std. Dev. | Slice 1 |
|------|----------------------|---------------|-----------|------------------|----------------------|----------------|----------|-----------------|------------------|--------------|--------|-------------------|---------------|-----------------|---------|
| ▶ 68 | GLTQHEVAELLGVSDSAVSK | phospho(STY)  | 2132.0515 | 0.3859           | 0.0514647...         | 62             | OE1385F  | yes             | yes              | 0            | 1      | 0                 | 5             | 0               |         |

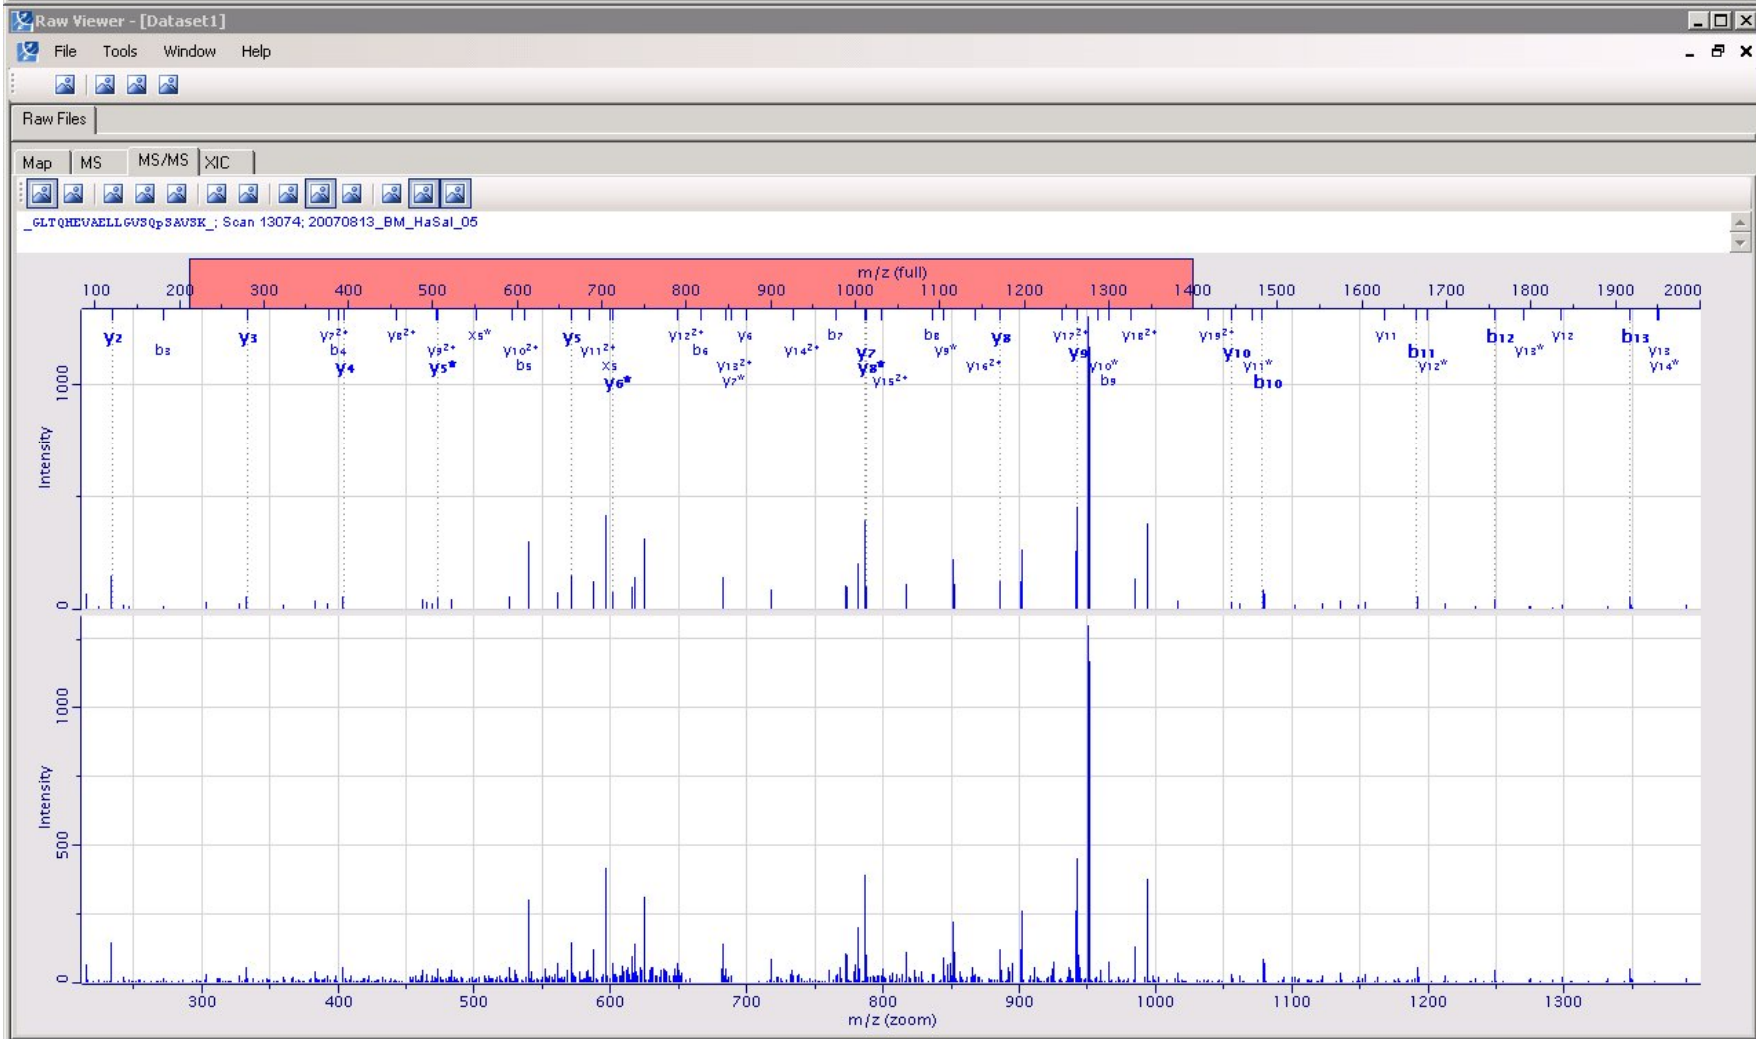

**Result Explorer**

Summary | Identifications | Modifications | All Peptides | MS Scans | MS/MS Scans | All Proteins

Protein Groups | Peptides | **Modification-Specific Peptides** | Evidence | MS/MS

|      | Sequence        | Modifications | Mass      | Mass Error [ppm] | Mass Fractional Part | Protein Groups | Proteins | Unique (Groups) | Unique (Protein) | Oxidative (M) | phosph | N-Acetyl (Protein) | Slice Average | Slice Std. Dev. | Slice 1 |
|------|-----------------|---------------|-----------|------------------|----------------------|----------------|----------|-----------------|------------------|---------------|--------|--------------------|---------------|-----------------|---------|
| ▶ 69 | GLGKSDPLEGAPQGR | phospho(STY)  | 1688.8247 | -0.2782          | 0.82469974           | 996            | OE4736R  | yes             | yes              | 0             | 1      | 0                  | 2             | 0               |         |

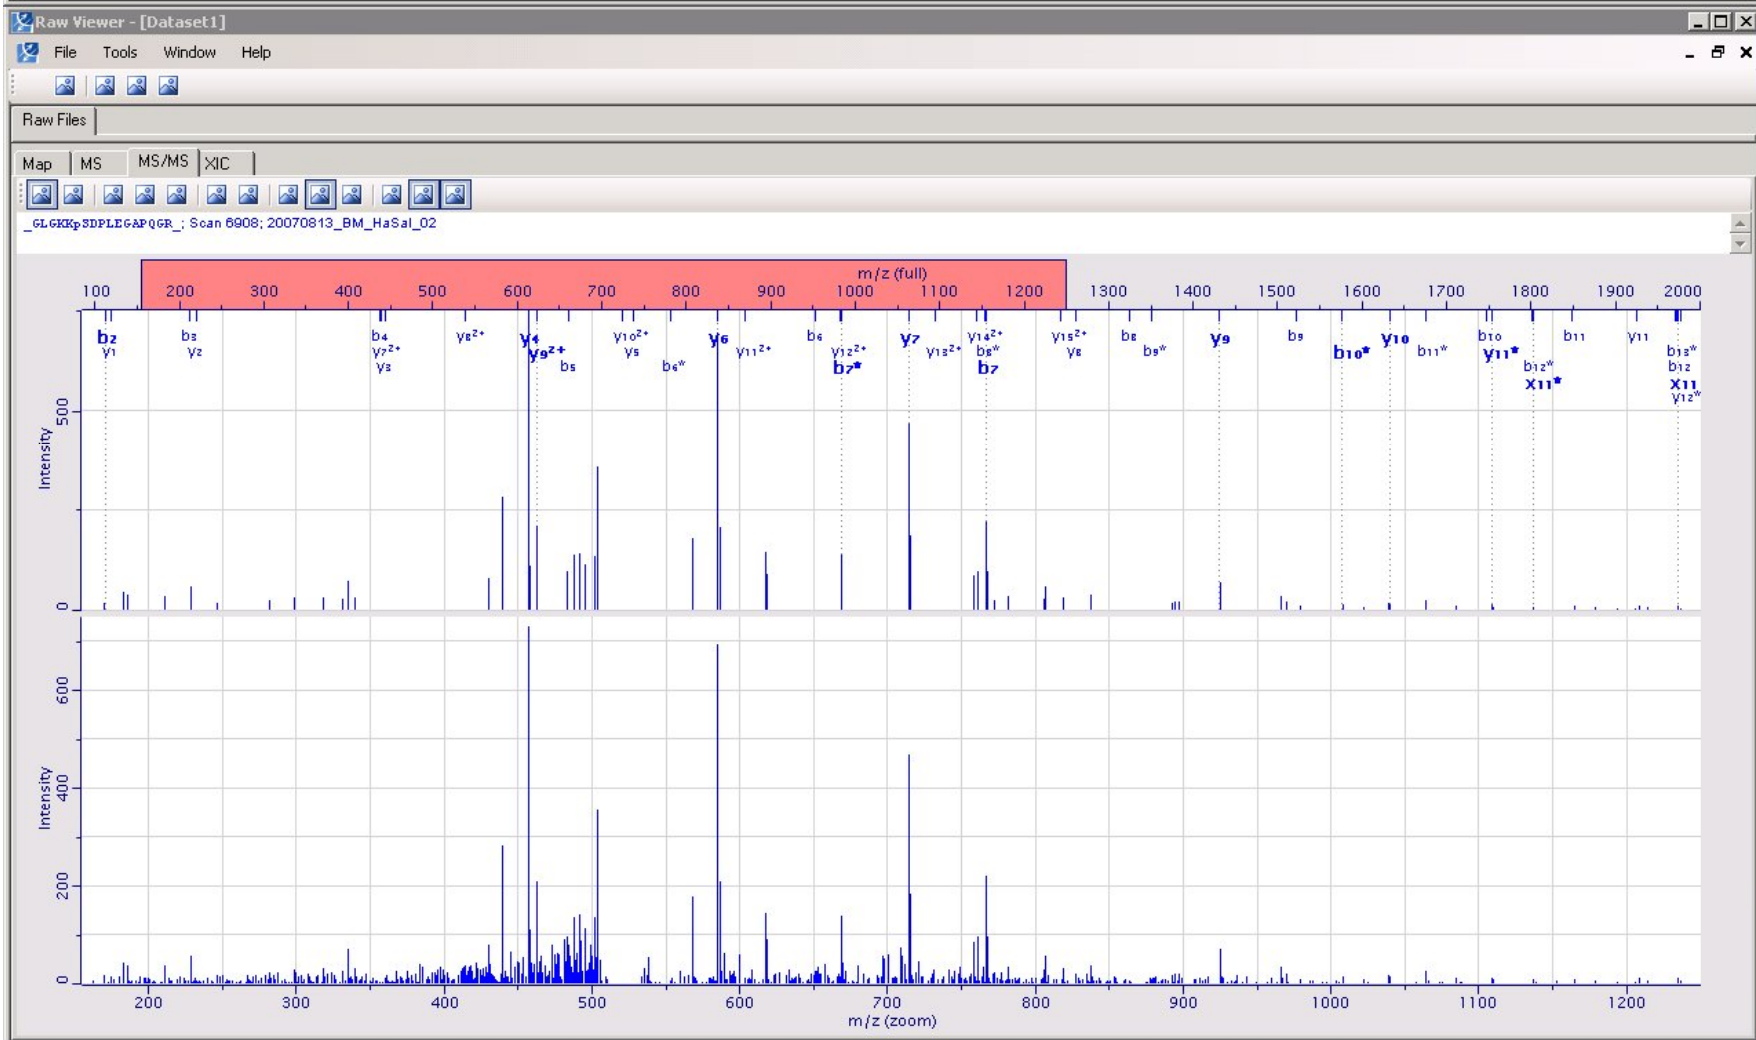

| Result Explorer                                                                                  |                   |               |          |                  |                      |                |          |                 |                  |              |        |                   |               |                 |         |
|--------------------------------------------------------------------------------------------------|-------------------|---------------|----------|------------------|----------------------|----------------|----------|-----------------|------------------|--------------|--------|-------------------|---------------|-----------------|---------|
| Summary   Identifications   Modifications   All Peptides   MS Scans   MS/MS Scans   All Proteins |                   |               |          |                  |                      |                |          |                 |                  |              |        |                   |               |                 |         |
| Protein Groups   Peptides   Modification-Specific Peptides   Evidence   MS/MS                    |                   |               |          |                  |                      |                |          |                 |                  |              |        |                   |               |                 |         |
|                                                                                                  | Sequence          | Modifications | Mass     | Mass Error [ppm] | Mass Fractional Part | Protein Groups | Proteins | Unique (Groups) | Unique (Protein) | Oxidatic (M) | phosph | N-Acety (Protein) | Slice Average | Slice Std. Dev. | Slice 1 |
| ▶ 70                                                                                             | GIQVTASHNPPSDNGIK | phospho(STY)  | 1813.836 | 0.077446         | 0.8359927            | 313            | OE2318R  | yes             | yes              | 0            | 1      | 0                 | 3.67          | 1.7             |         |

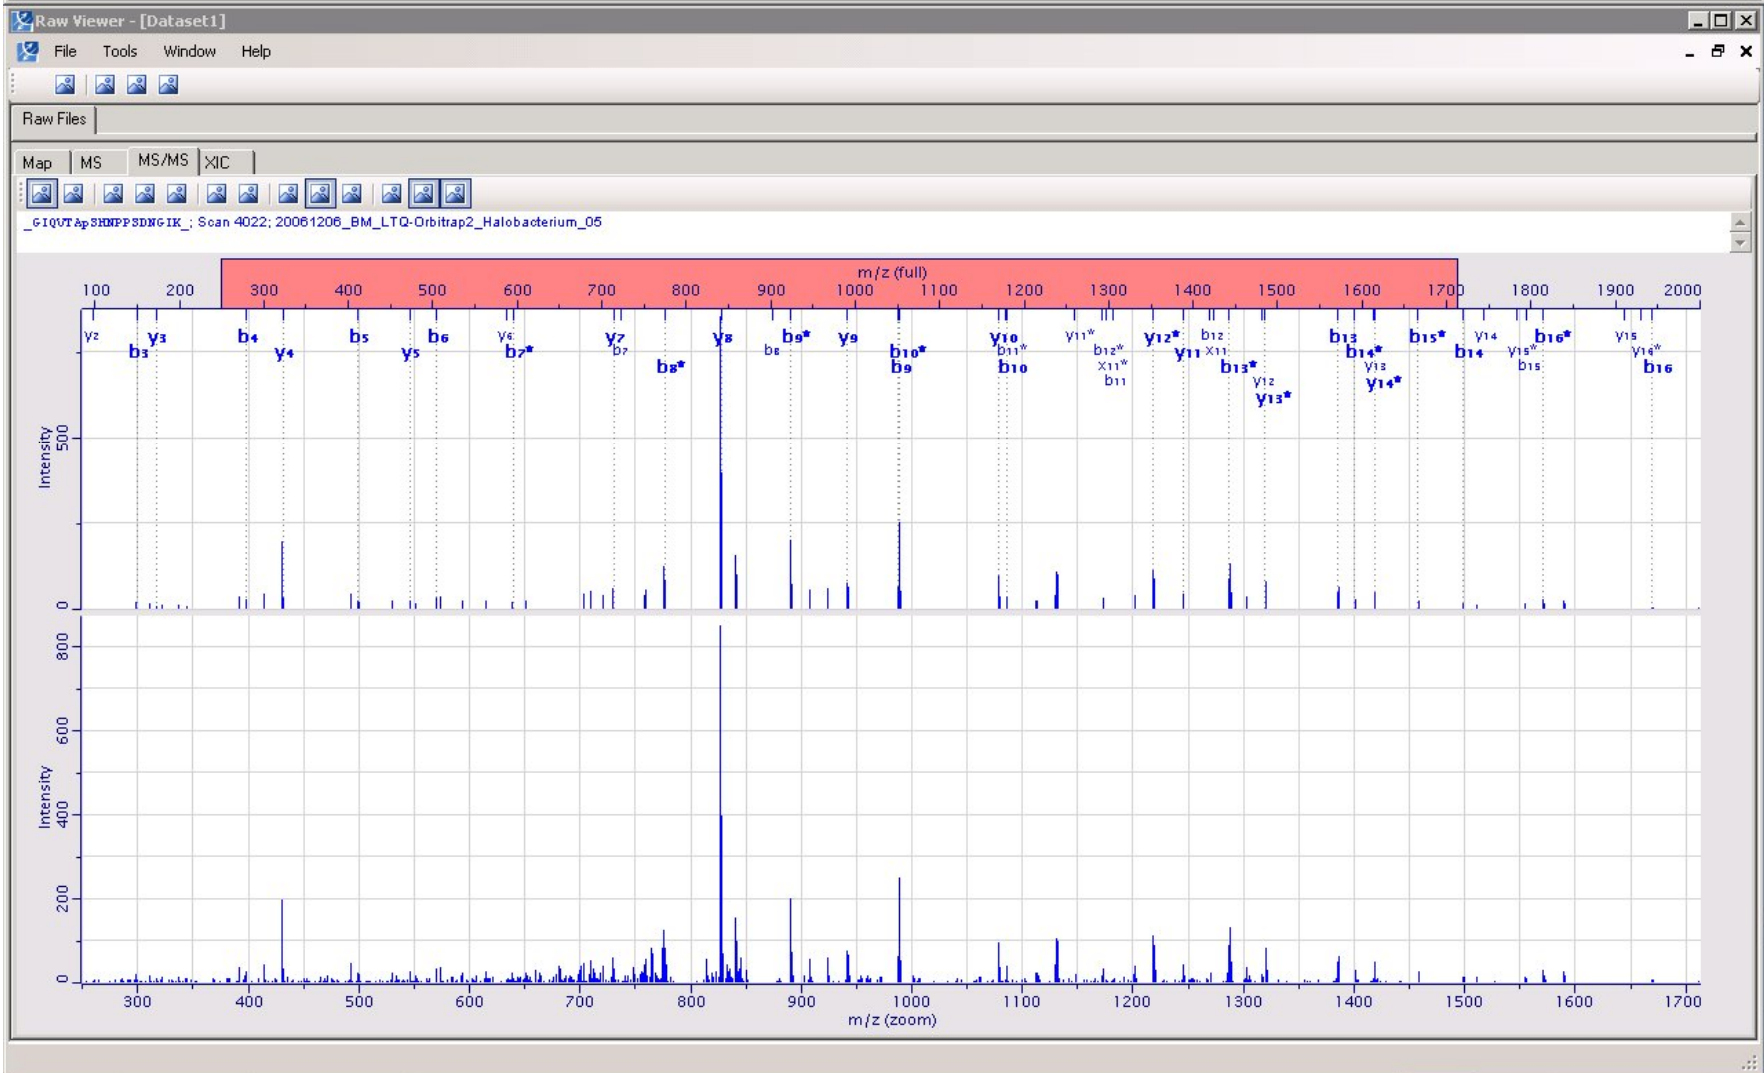

| Result Explorer                                                                                  |          |               |           |                  |                      |                |          |                 |                  |              |        |                    |               |                 |         |
|--------------------------------------------------------------------------------------------------|----------|---------------|-----------|------------------|----------------------|----------------|----------|-----------------|------------------|--------------|--------|--------------------|---------------|-----------------|---------|
| Summary   Identifications   Modifications   All Peptides   MS Scans   MS/MS Scans   All Proteins |          |               |           |                  |                      |                |          |                 |                  |              |        |                    |               |                 |         |
| Protein Groups   Peptides   Modification-Specific Peptides   Evidence   MS/MS                    |          |               |           |                  |                      |                |          |                 |                  |              |        |                    |               |                 |         |
|                                                                                                  | Sequence | Modifications | Mass      | Mass Error [ppm] | Mass Fractional Part | Protein Groups | Proteins | Unique (Groups) | Unique (Protein) | Oxidatic (M) | phosph | N-Acetyl (Protein) | Slice Average | Slice Std. Dev. | Slice 1 |
| 71                                                                                               | GGDIKVS  | phospho(STY)  | 910.42735 | 0.41528          | 0.42734711           | 976            | OE4671R  | yes             | yes              | 0            | 1      | 0                  | 3             | 0               |         |

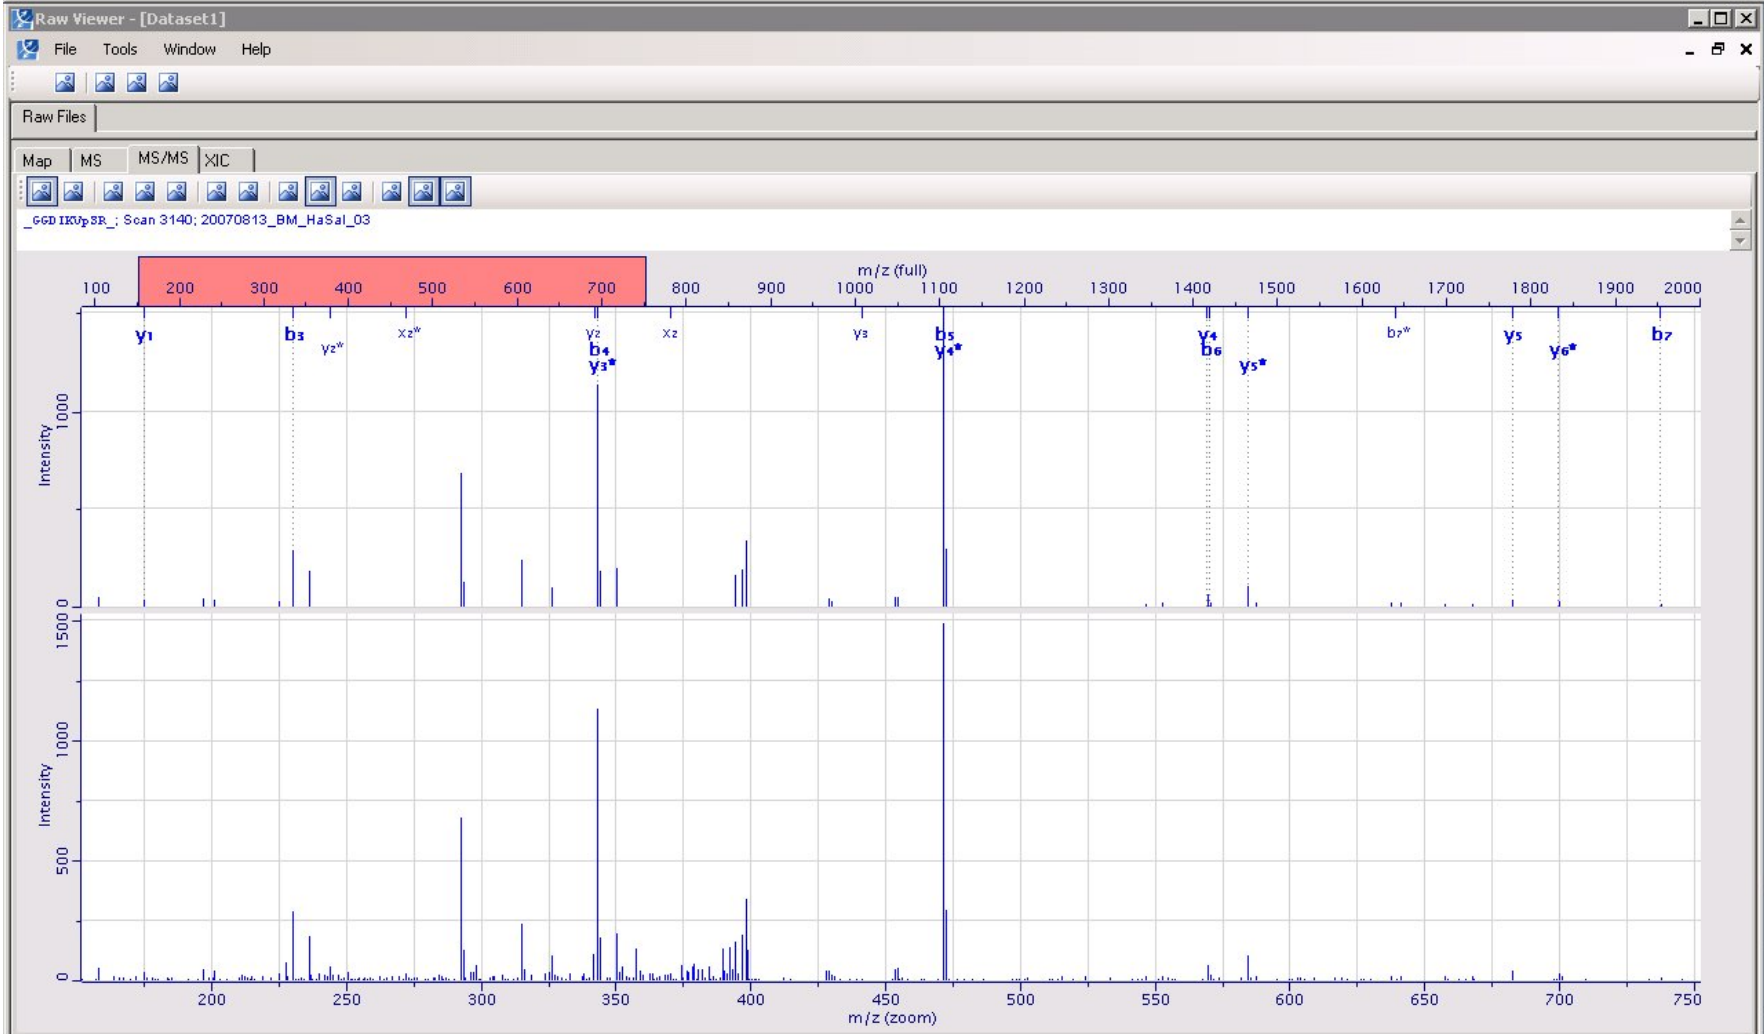

**Result Explorer**

Summary | Identifications | Modifications | All Peptides | MS Scans | MS/MS Scans | All Proteins

Protein Groups | Peptides | Modification-Specific Peptides | Evidence | MS/MS

|    | Sequence                  | Modifications | Mass      | Mass Error [ppm] | Mass Fractional Part | Protein Groups | Proteins | Unique (Groups) | Unique (Protein) | Oxidative (M) | phosph | N-Acety (Protein) | Slice Average | Slice Std. Dev. | Slice 1 |
|----|---------------------------|---------------|-----------|------------------|----------------------|----------------|----------|-----------------|------------------|---------------|--------|-------------------|---------------|-----------------|---------|
| 72 | GDYGNDLGHNLIHGSDHEDEGANER | phospho(STY)  | 2800.1111 | 0.58066          | 0.11105795           | 421            | OE2667F  | yes             | yes              | 0             | 1      | 0                 | 1             | 0               | 1       |

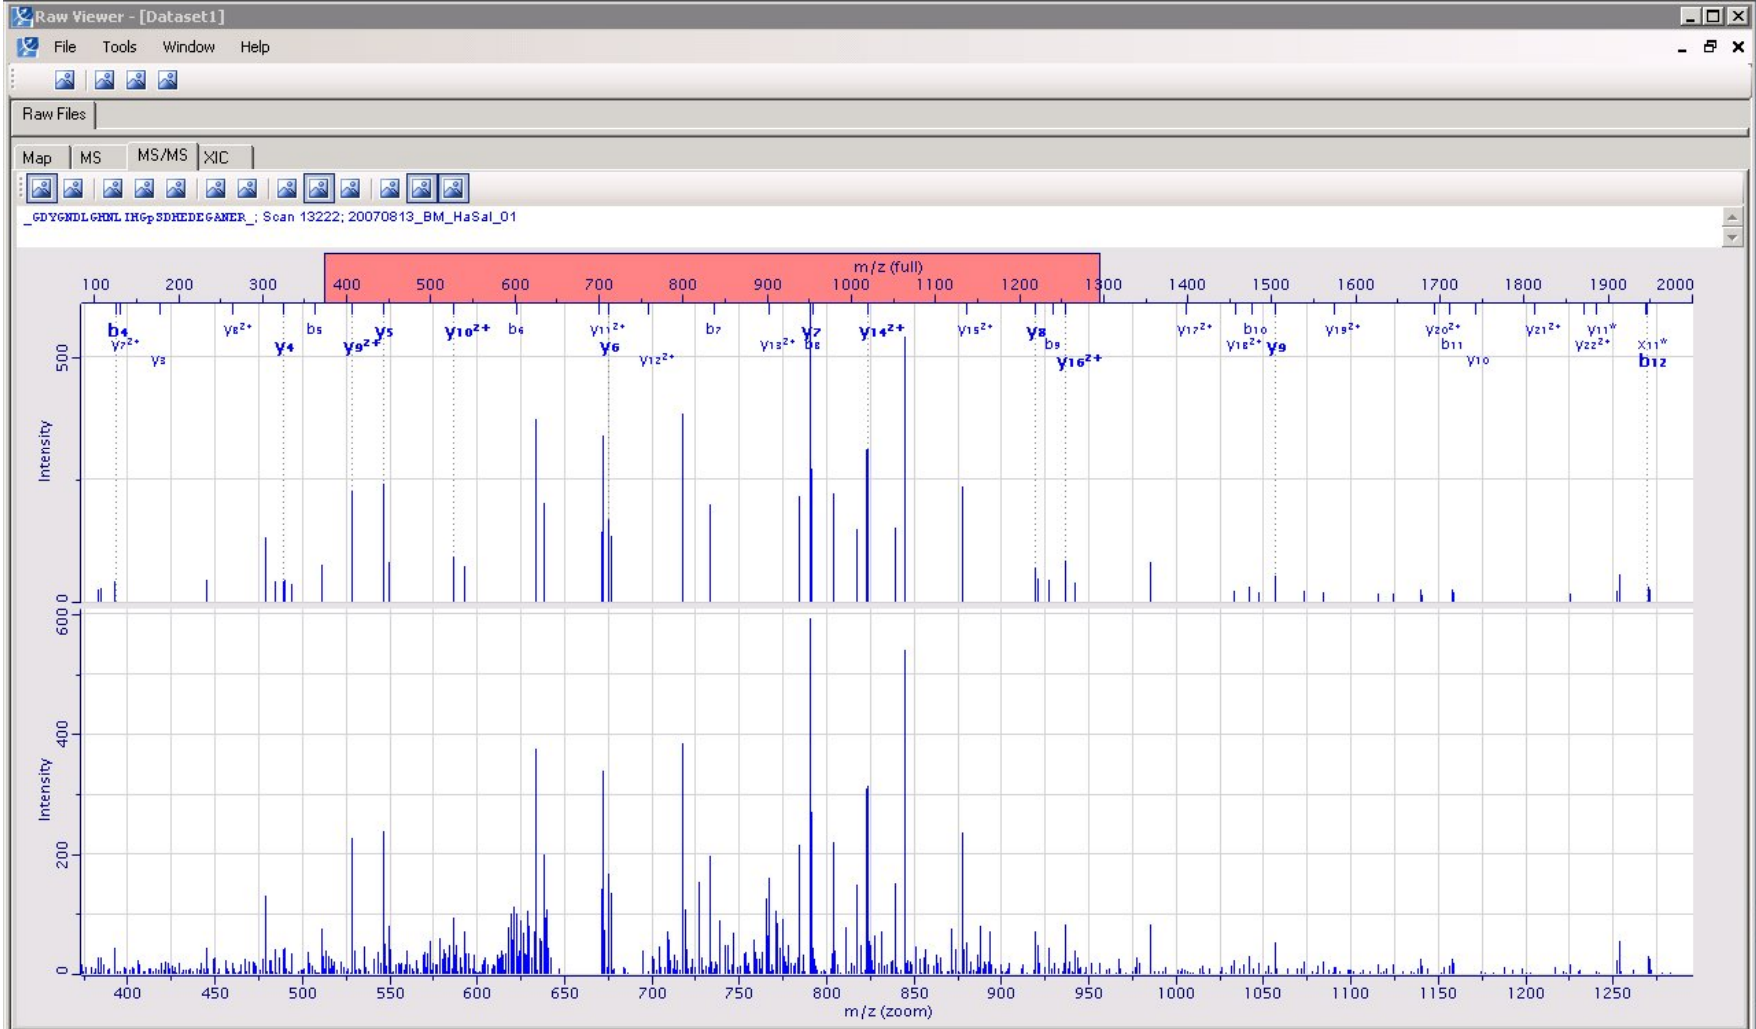



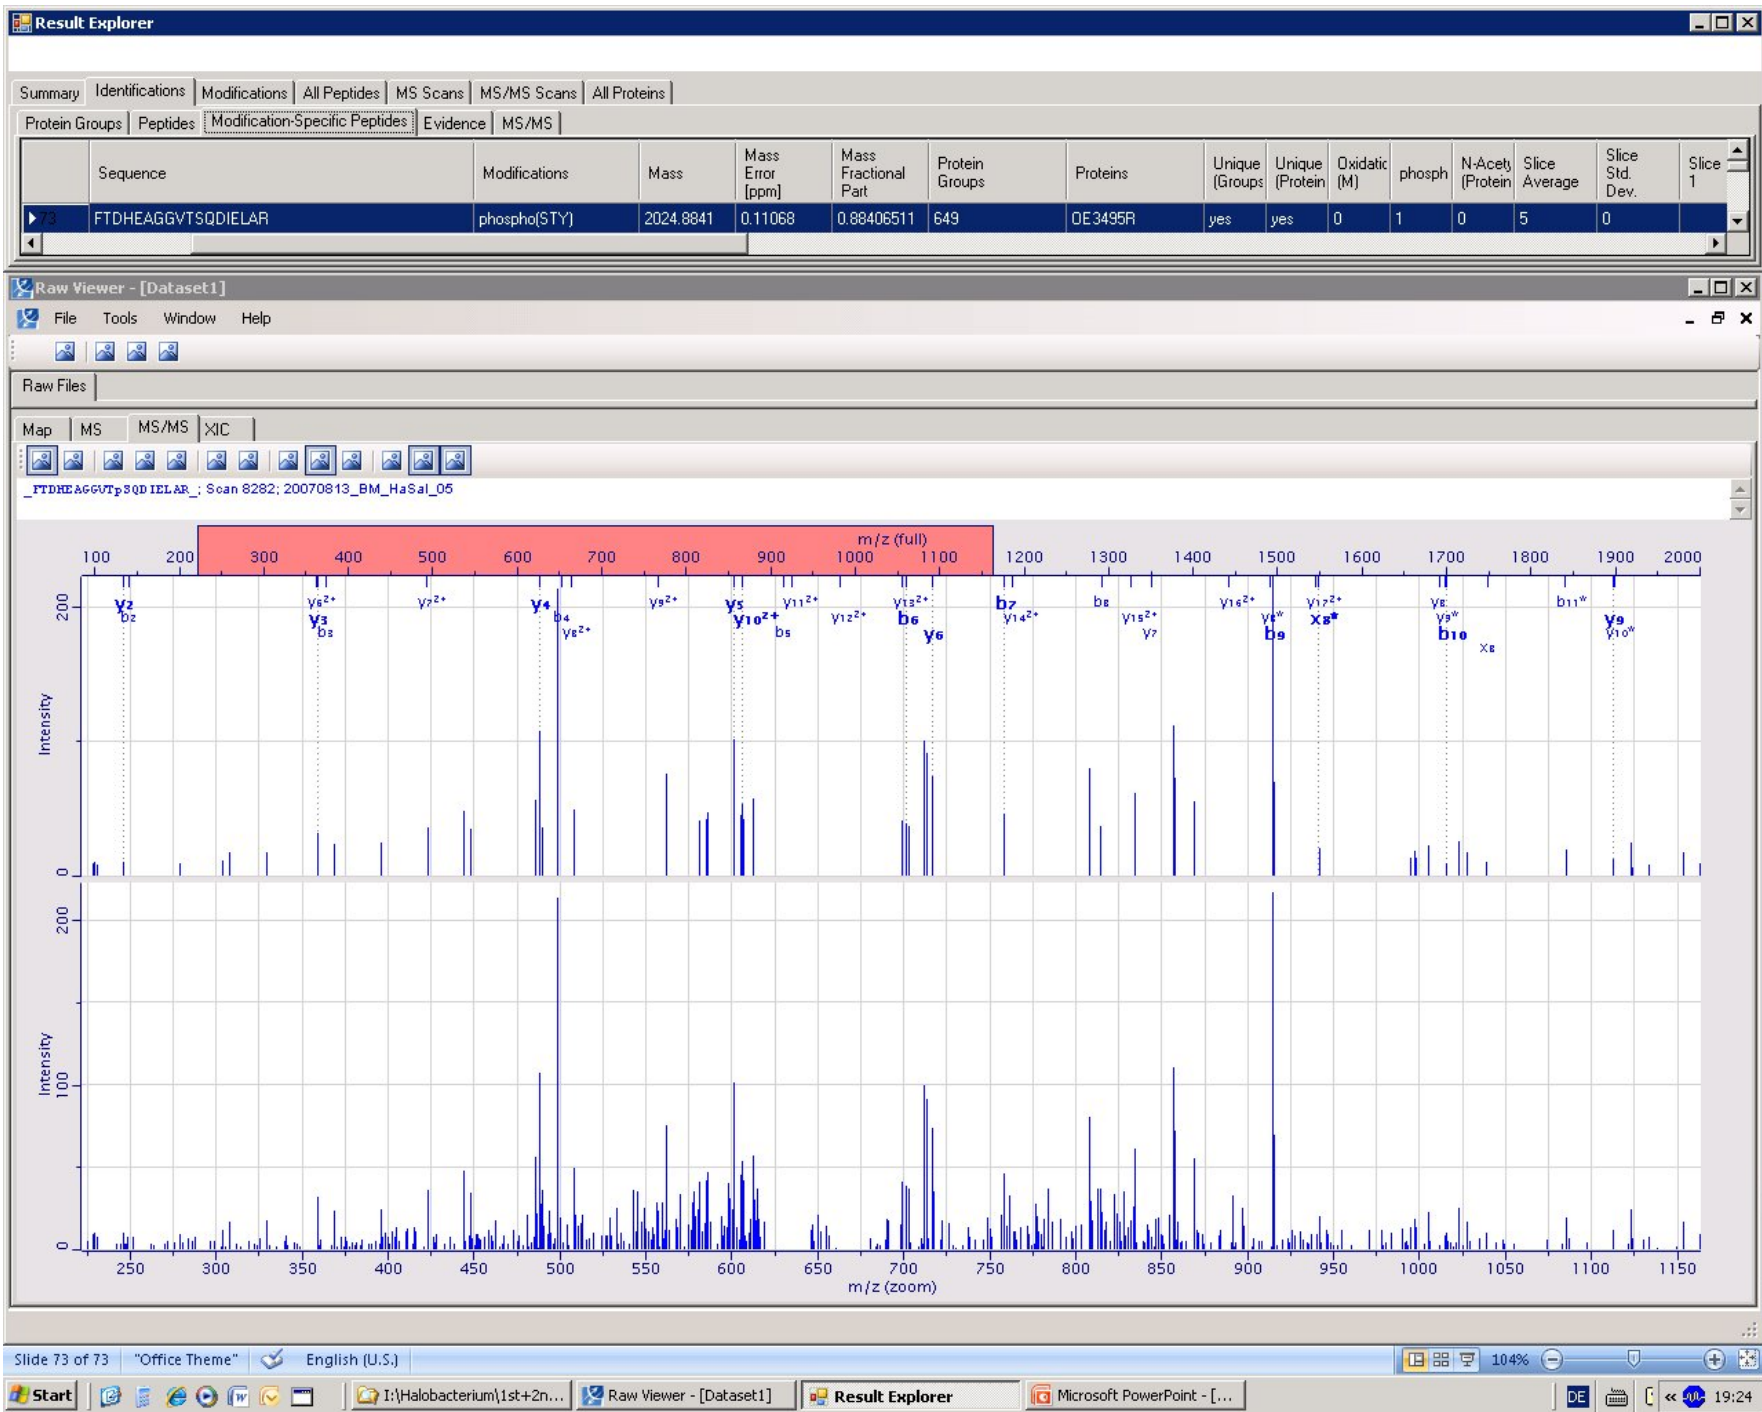

**Result Explorer**

Summary | Identifications | Modifications | All Peptides | MS Scans | MS/MS Scans | All Proteins

Protein Groups | Peptides | **Modification-Specific Peptides** | Evidence | MS/MS

|      | Sequence                                                                        | Modifications | Mass      | Mass Error [ppm] | Mass Fractional Part | Protein Groups | Proteins | Unique (Groups) | Unique (Protein) | Oxidatic (M) | phosph | N-Acety (Protein) | Slice Average | Slice Std. Dev. | Slice 1 |
|------|---------------------------------------------------------------------------------|---------------|-----------|------------------|----------------------|----------------|----------|-----------------|------------------|--------------|--------|-------------------|---------------|-----------------|---------|
| ▶ 74 | ETT <sup>+</sup> VNLPFVTATD <sup>p</sup> SGP <sup>+</sup> VHLEQDIT <sup>R</sup> | phospho(STY)  | 2819.3379 | -0.38444         | 0.33786998           | 153            | OE1737R  | yes             | yes              | 0            | 1      | 0                 | 7             | 0               |         |

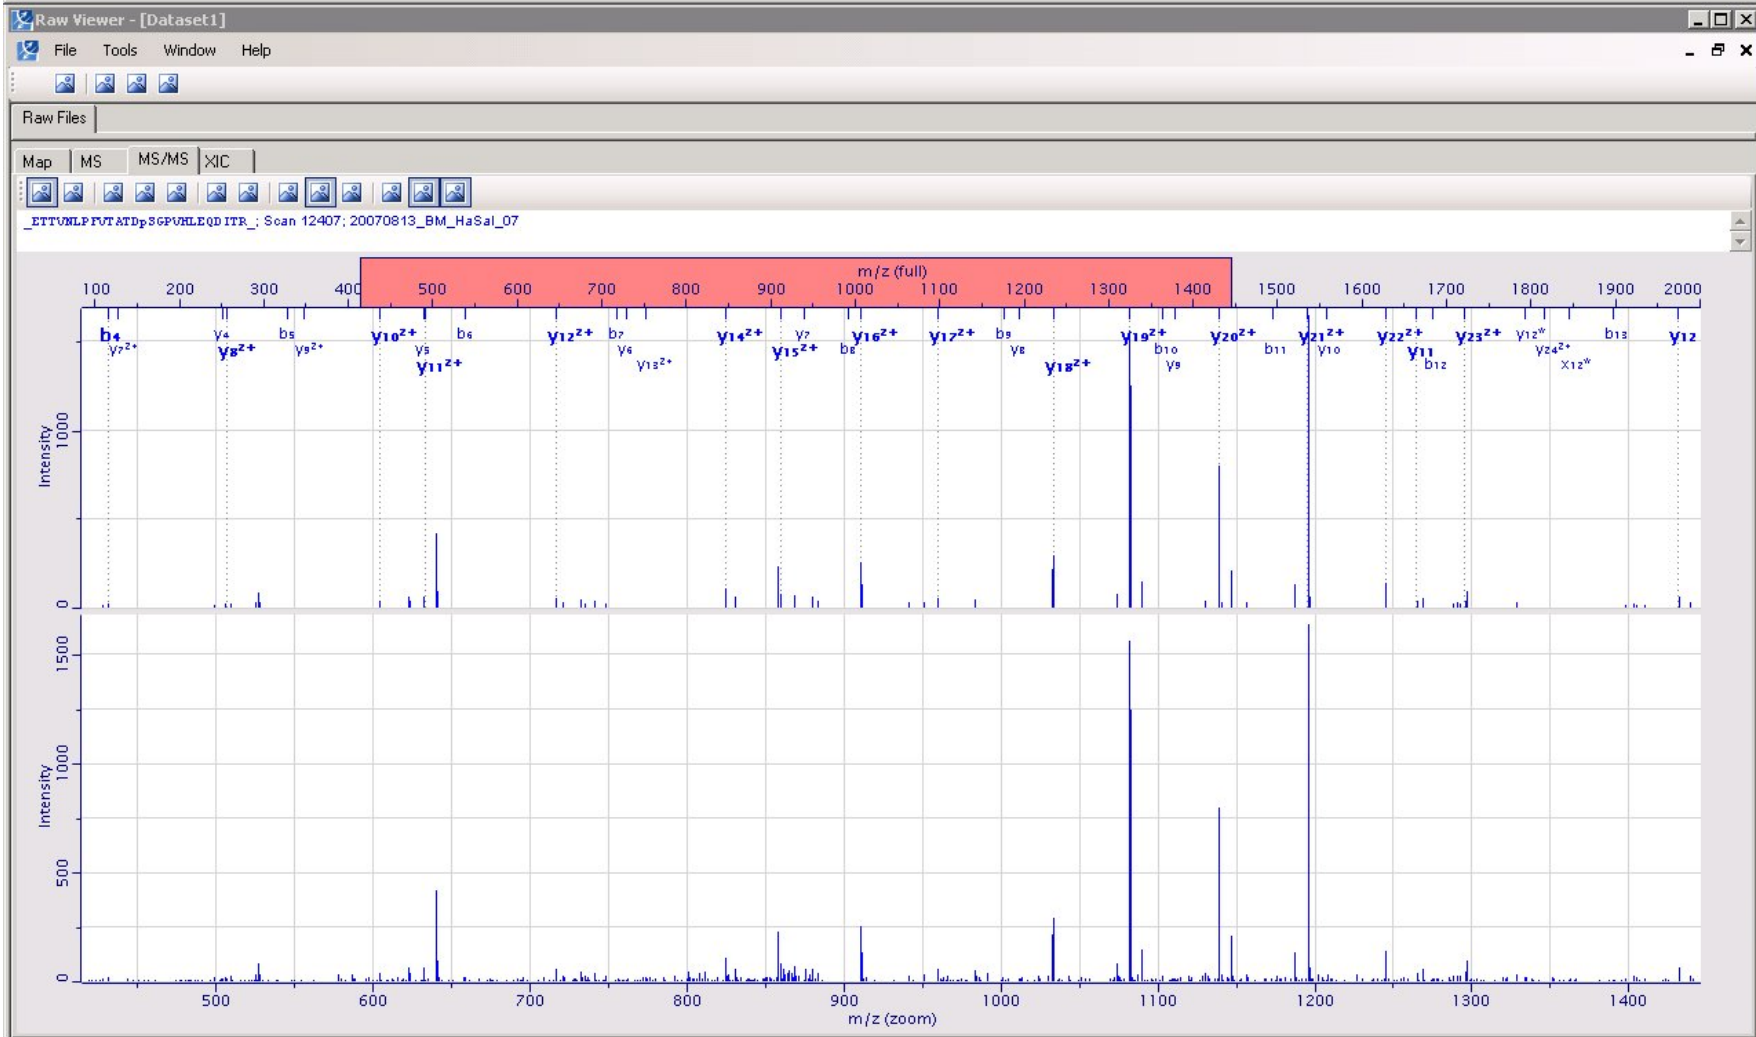

| Result Explorer                                                                                  |                    |               |           |                  |                      |                |          |                 |                  |               |        |                    |               |                 |         |
|--------------------------------------------------------------------------------------------------|--------------------|---------------|-----------|------------------|----------------------|----------------|----------|-----------------|------------------|---------------|--------|--------------------|---------------|-----------------|---------|
| Summary   Identifications   Modifications   All Peptides   MS Scans   MS/MS Scans   All Proteins |                    |               |           |                  |                      |                |          |                 |                  |               |        |                    |               |                 |         |
| Protein Groups   Peptides   Modification-Specific Peptides   Evidence   MS/MS                    |                    |               |           |                  |                      |                |          |                 |                  |               |        |                    |               |                 |         |
|                                                                                                  | Sequence           | Modifications | Mass      | Mass Error [ppm] | Mass Fractional Part | Protein Groups | Proteins | Unique (Groups) | Unique (Protein) | Oxidative (M) | phosph | N-Acetyl (Protein) | Slice Average | Slice Std. Dev. | Slice 1 |
| ▶ 75                                                                                             | EQIDSERDAVLADGESDR | phospho(STY)  | 2083.8695 | -0.30444         | 0.86953726           | 786            | OE3992R  | yes             | yes              | 0             | 1      | 0                  | 6             | 0               |         |

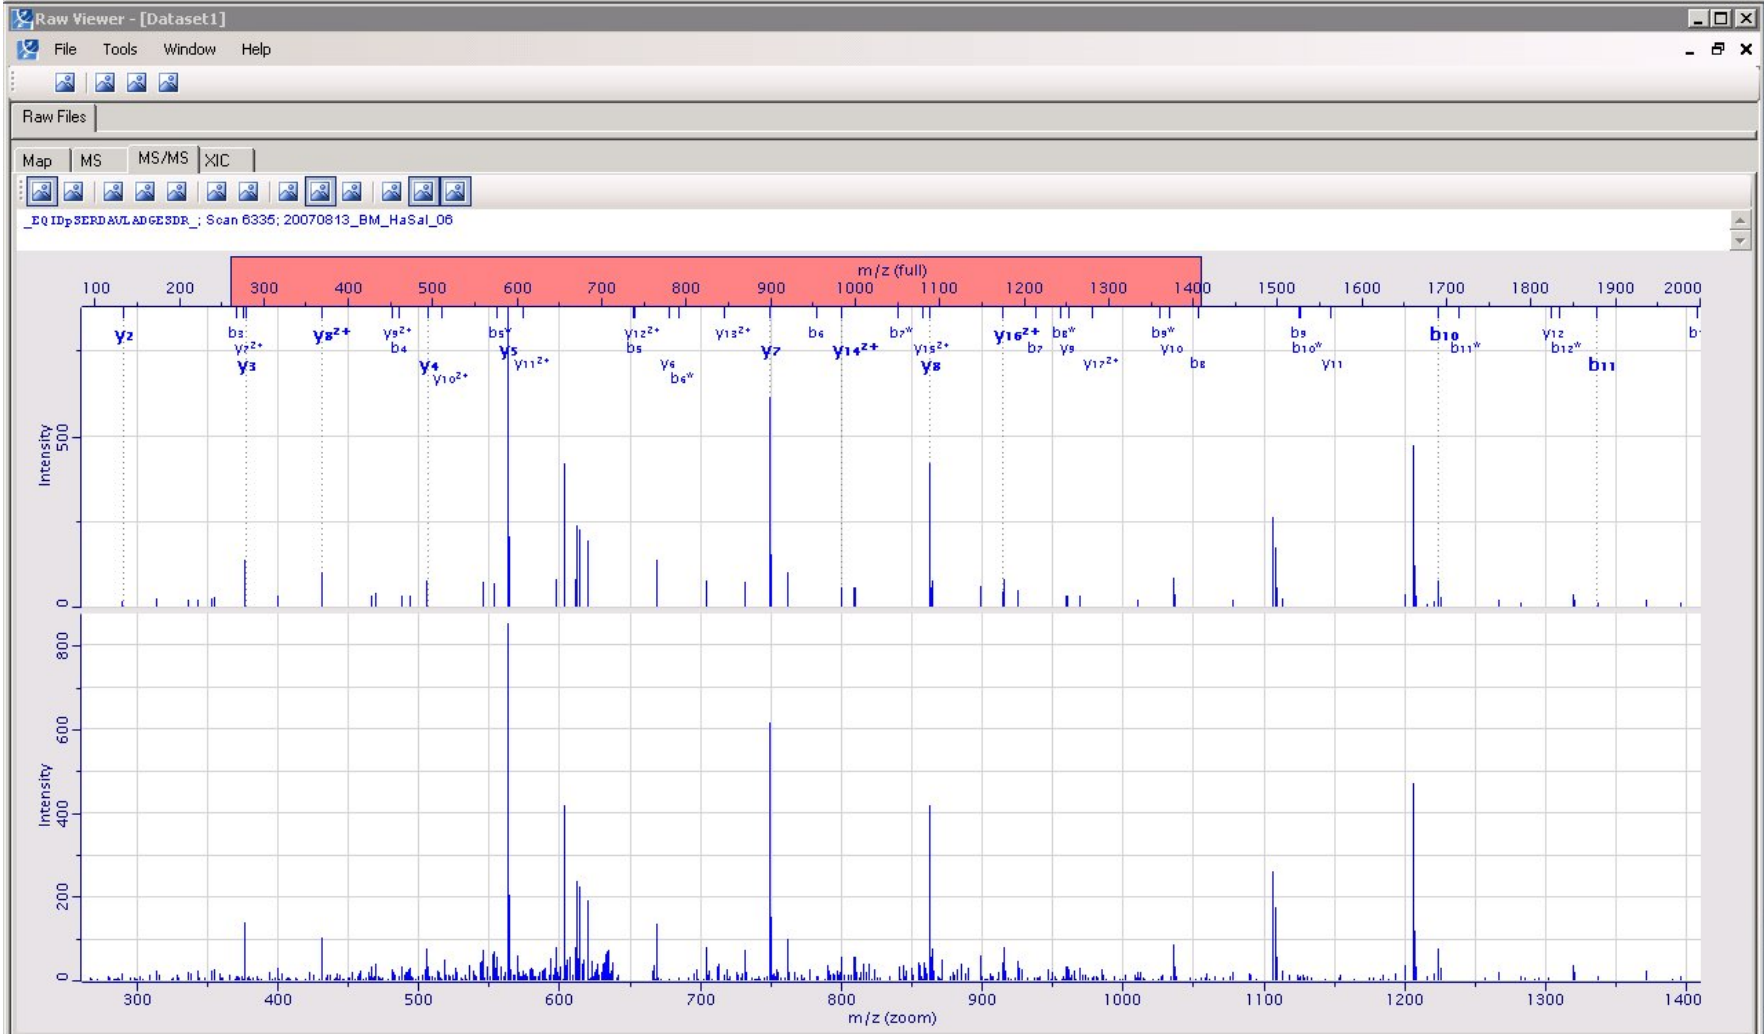

**Result Explorer**

Summary | Identifications | Modifications | All Peptides | MS Scans | MS/MS Scans | All Proteins

Protein Groups | Peptides | **Modification-Specific Peptides** | Evidence | MS/MS

|      | Sequence                     | Modifications           | Mass      | Mass Error [ppm] | Mass Fractional Part | Protein Groups | Proteins | Unique (Groups) | Unique (Protein) | Oxidatic (M) | phosph | N-Acety (Protein) | Slice Average | Slice Std. Dev. | Slice 1 |
|------|------------------------------|-------------------------|-----------|------------------|----------------------|----------------|----------|-----------------|------------------|--------------|--------|-------------------|---------------|-----------------|---------|
| ▶ 75 | EHEPPIATSTIAEYLDVTPPTVTSMAEK | Oxidation (M),phosph... | 3122.4407 | 0.085705         | 0.44069085           | 169            | OE1797R  | yes             | yes              | 1            | 1      | 0                 | 6             | 0               |         |

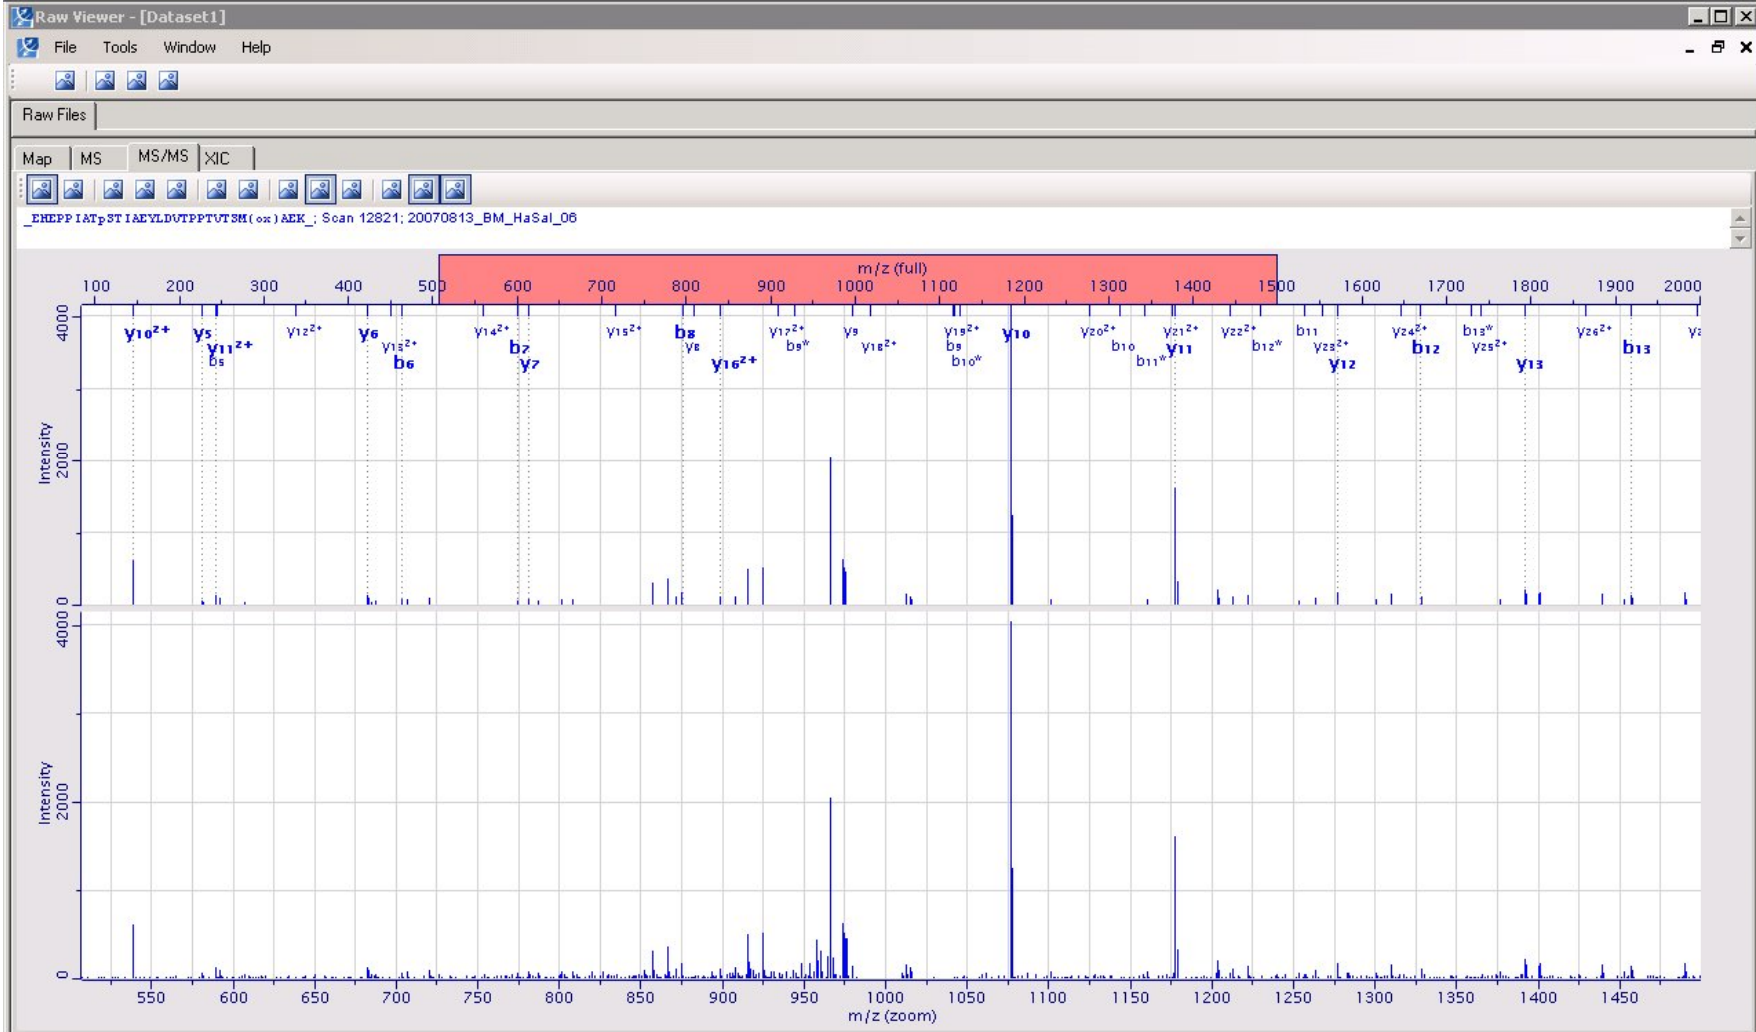

| Protein Groups | Peptides        | Modification-Specific Peptides | Evidence  | MS/MS            |                      |                |          |                 |                  |              |        |                    |               |                 |         |
|----------------|-----------------|--------------------------------|-----------|------------------|----------------------|----------------|----------|-----------------|------------------|--------------|--------|--------------------|---------------|-----------------|---------|
|                | Sequence        | Modifications                  | Mass      | Mass Error [ppm] | Mass Fractional Part | Protein Groups | Proteins | Unique (Groups) | Unique (Protein) | Oxidatic (M) | phosph | N-Acetyl (Protein) | Slice Average | Slice Std. Dev. | Slice 1 |
| 77             | DVVYDLEQESGTRVR | phospho(STY)                   | 1844.8306 | -0.053161        | 0.83057298           | 1039           | OE5201F  | yes             | yes              | 0            | 1      | 0                  | 5             | 0               |         |

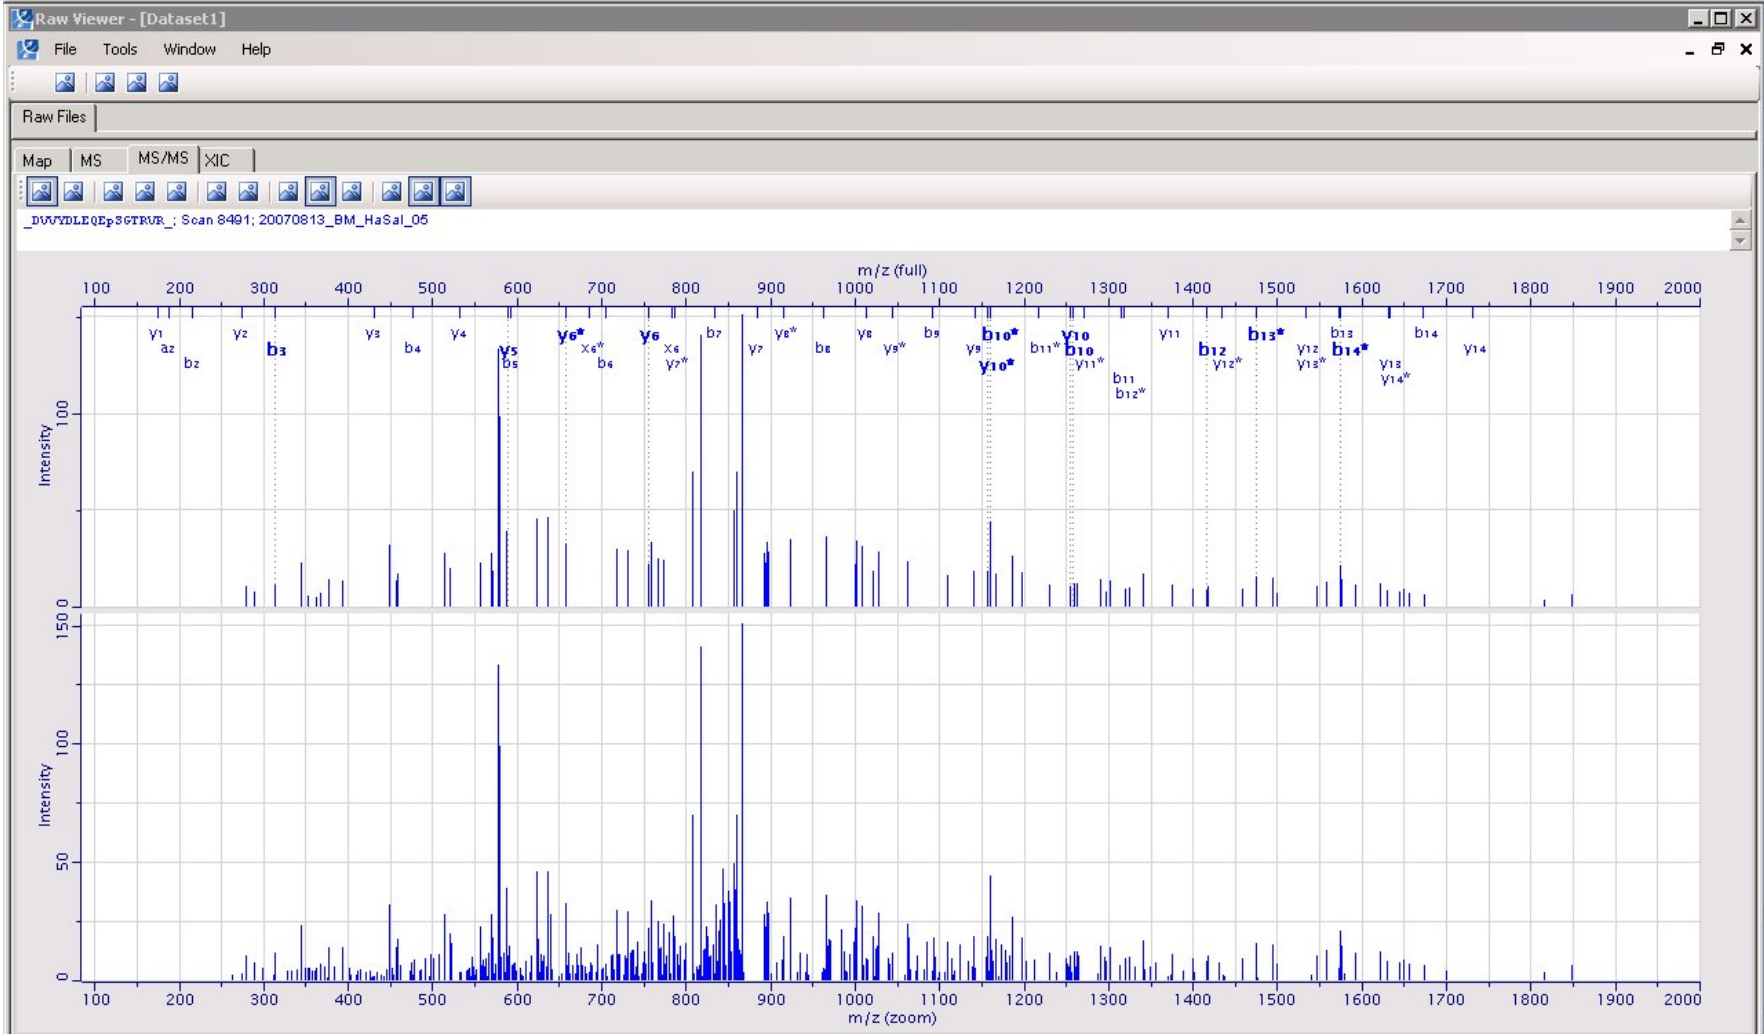

**Result Explorer**

Summary | Identifications | Modifications | All Peptides | MS Scans | MS/MS Scans | All Proteins

Protein Groups | Peptides | **Modification-Specific Peptides** | Evidence | MS/MS

|    | Sequence                  | Modifications | Mass      | Mass Error [ppm] | Mass Fractional Part | Protein Groups | Proteins | Unique (Groups) | Unique (Protein) | Oxidatic (M) | phosph | N-Acety (Protein) | Slice Average | Slice Std. Dev. | Slice 1 |
|----|---------------------------|---------------|-----------|------------------|----------------------|----------------|----------|-----------------|------------------|--------------|--------|-------------------|---------------|-----------------|---------|
| 78 | DVGLPDGQMGNPSEVGHILTIGAGR | phospho(STY)  | 2359.0628 | -0.44769         | 0.0627745...         | 689            | OE3653R  | yes             | yes              | 0            | 1      | 0                 | 6             | 0               |         |

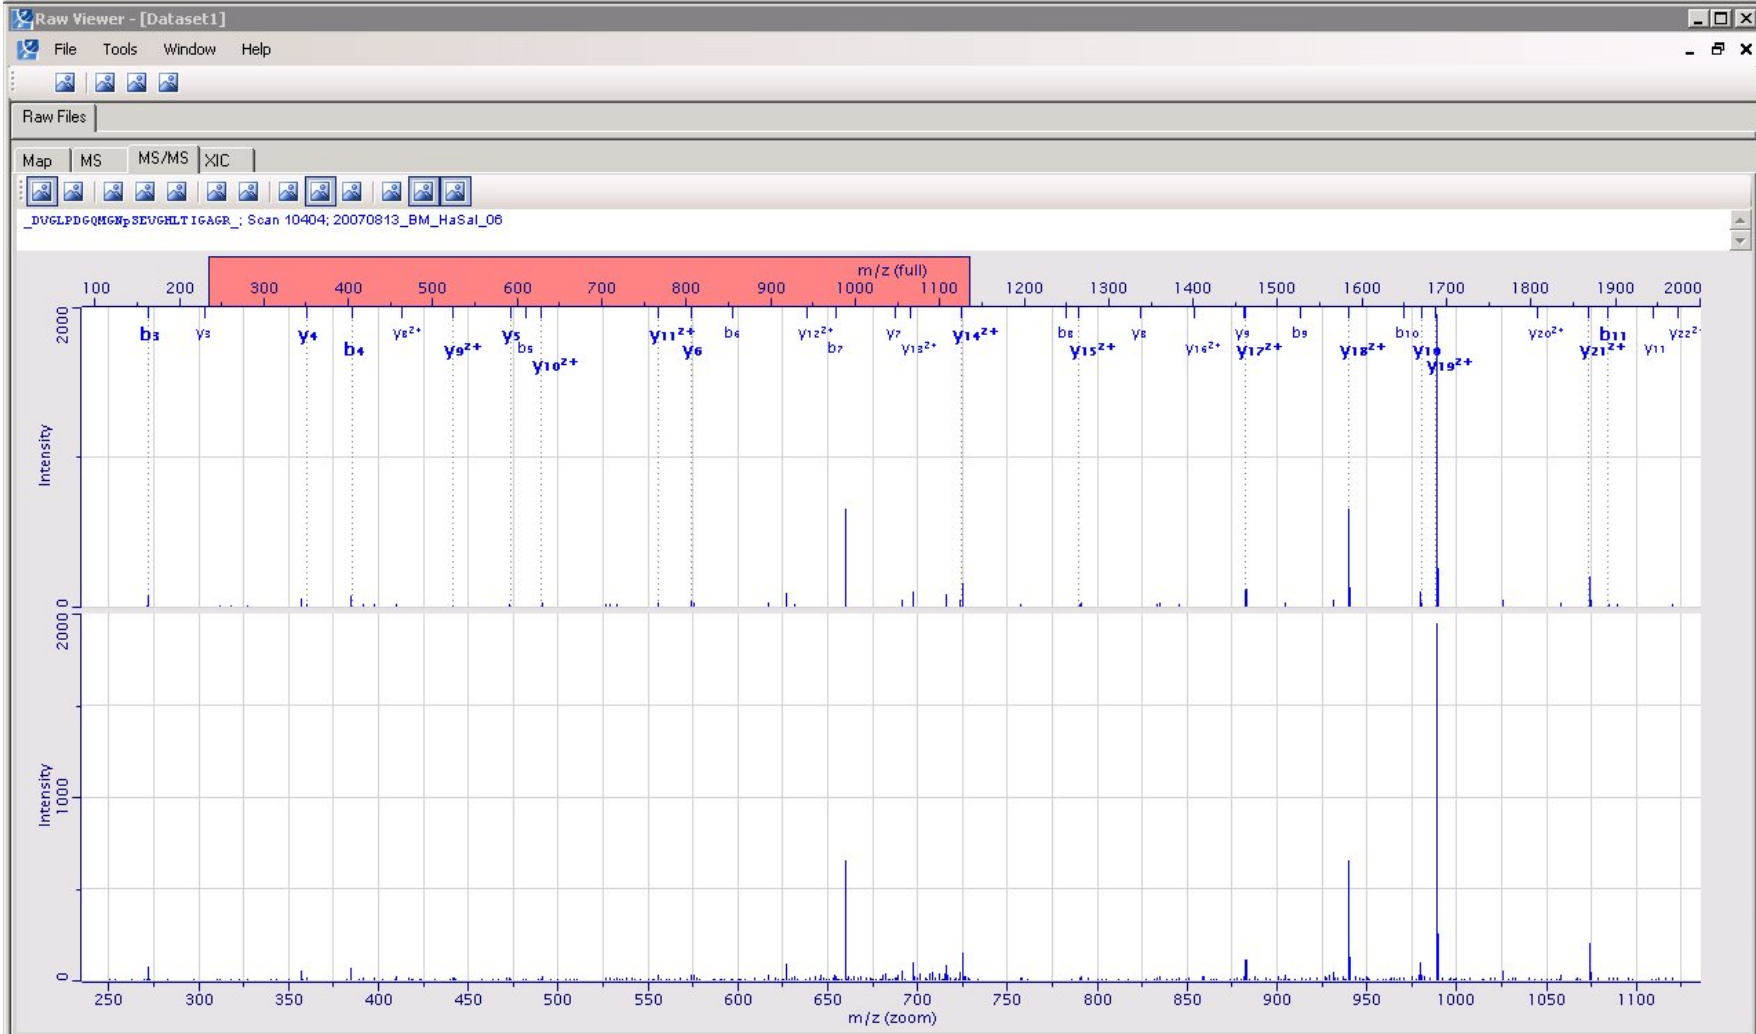

| Result Explorer                                                                                  |                         |                         |           |                  |                      |                |          |                 |                  |              |        |                    |               |                 |         |
|--------------------------------------------------------------------------------------------------|-------------------------|-------------------------|-----------|------------------|----------------------|----------------|----------|-----------------|------------------|--------------|--------|--------------------|---------------|-----------------|---------|
| Summary   Identifications   Modifications   All Peptides   MS Scans   MS/MS Scans   All Proteins |                         |                         |           |                  |                      |                |          |                 |                  |              |        |                    |               |                 |         |
| Protein Groups   Peptides   Modification-Specific Peptides   Evidence   MS/MS                    |                         |                         |           |                  |                      |                |          |                 |                  |              |        |                    |               |                 |         |
|                                                                                                  | Sequence                | Modifications           | Mass      | Mass Error [ppm] | Mass Fractional Part | Protein Groups | Proteins | Unique (Groups) | Unique (Protein) | Oxidatic (M) | phosph | N-Acetyl (Protein) | Slice Average | Slice Std. Dev. | Slice 1 |
| 79                                                                                               | DVGLPDGQMGNSEVGHLTIGAGR | Oxidation (M),phosph... | 2375.0577 | -0.35535         | 0.0576999...         | 689            | OE3653R  | yes             | yes              | 1            | 1      | 0                  | 6.5           | 0.5             |         |

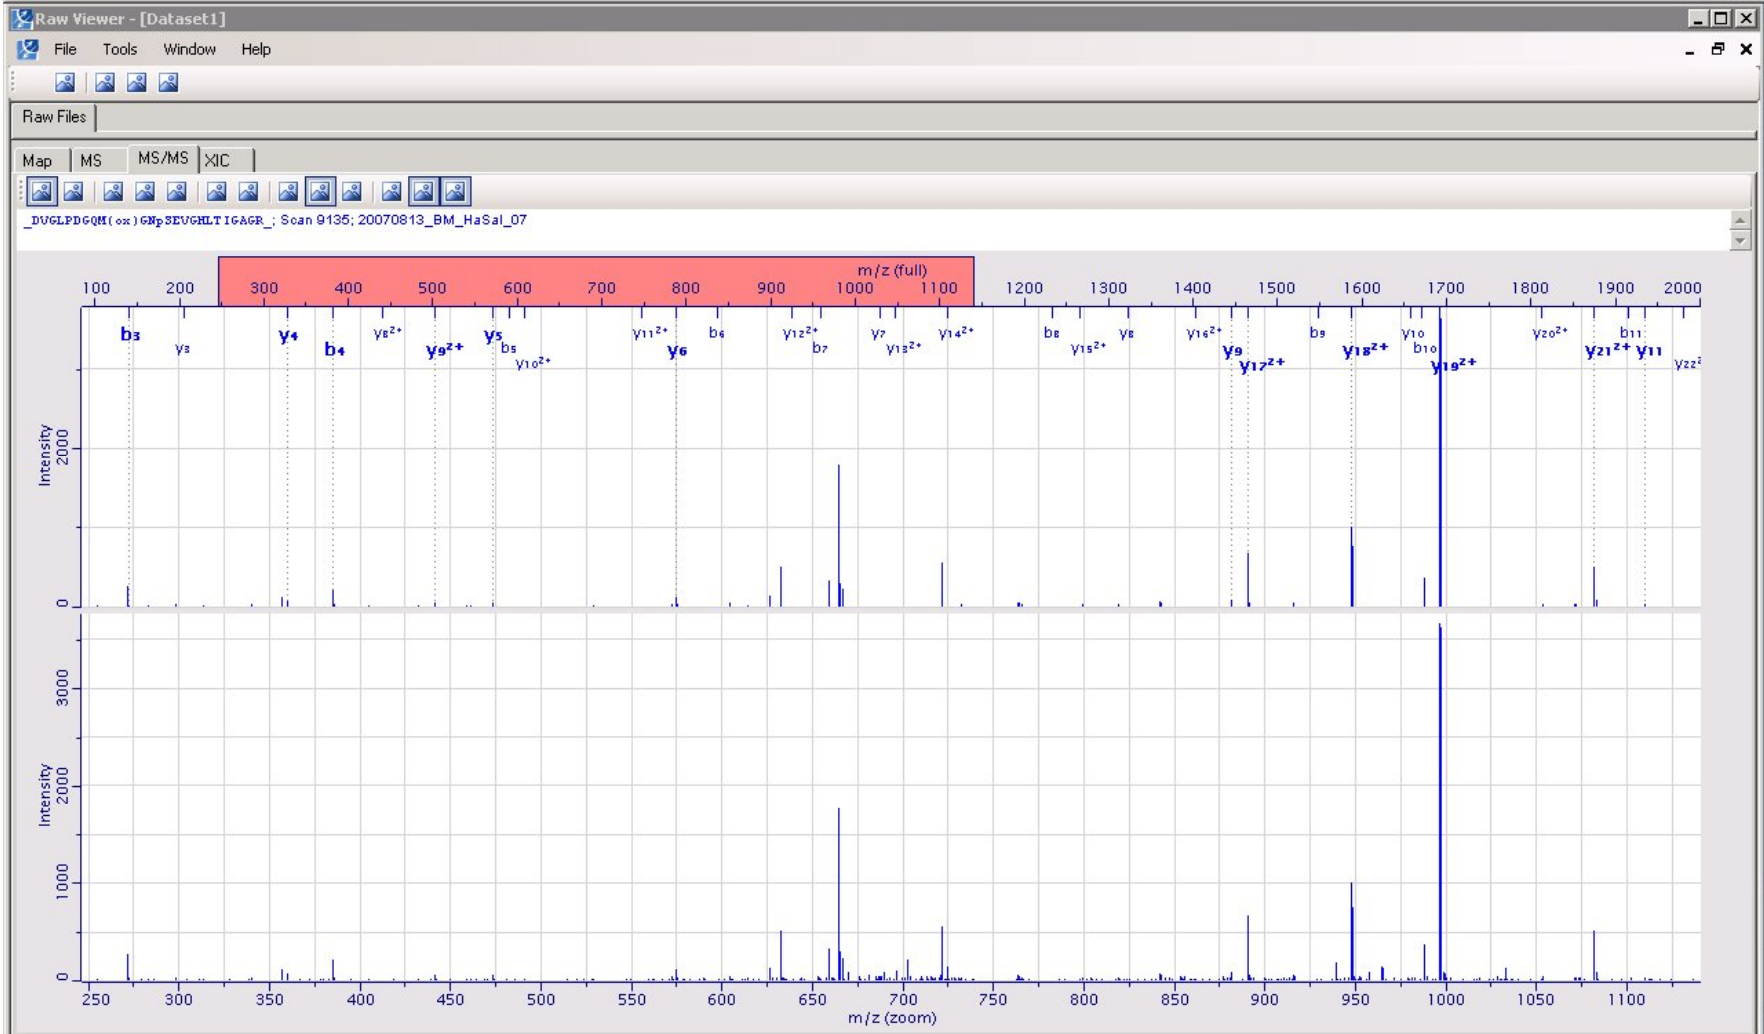

**Result Explorer**

Summary | Identifications | Modifications | All Peptides | MS Scans | MS/MS Scans | All Proteins

Protein Groups | Peptides | **Modification-Specific Peptides** | Evidence | MS/MS

|      | Sequence     | Modifications | Mass      | Mass Error [ppm] | Mass Fractional Part | Protein Groups | Proteins | Unique (Groups) | Unique (Protein) | Oxidatic (M) | phosph | N-Acety (Protein) | Slice Average | Slice Std. Dev. | Slice 1 |
|------|--------------|---------------|-----------|------------------|----------------------|----------------|----------|-----------------|------------------|--------------|--------|-------------------|---------------|-----------------|---------|
| ▶ 80 | DVLDLSLSSDLK | phospho(STY)  | 1385.5963 | 0.43799          | 0.59632251           | 961            | OE4626R  | yes             | yes              | 0            | 1      | 0                 | 9             | 0               |         |

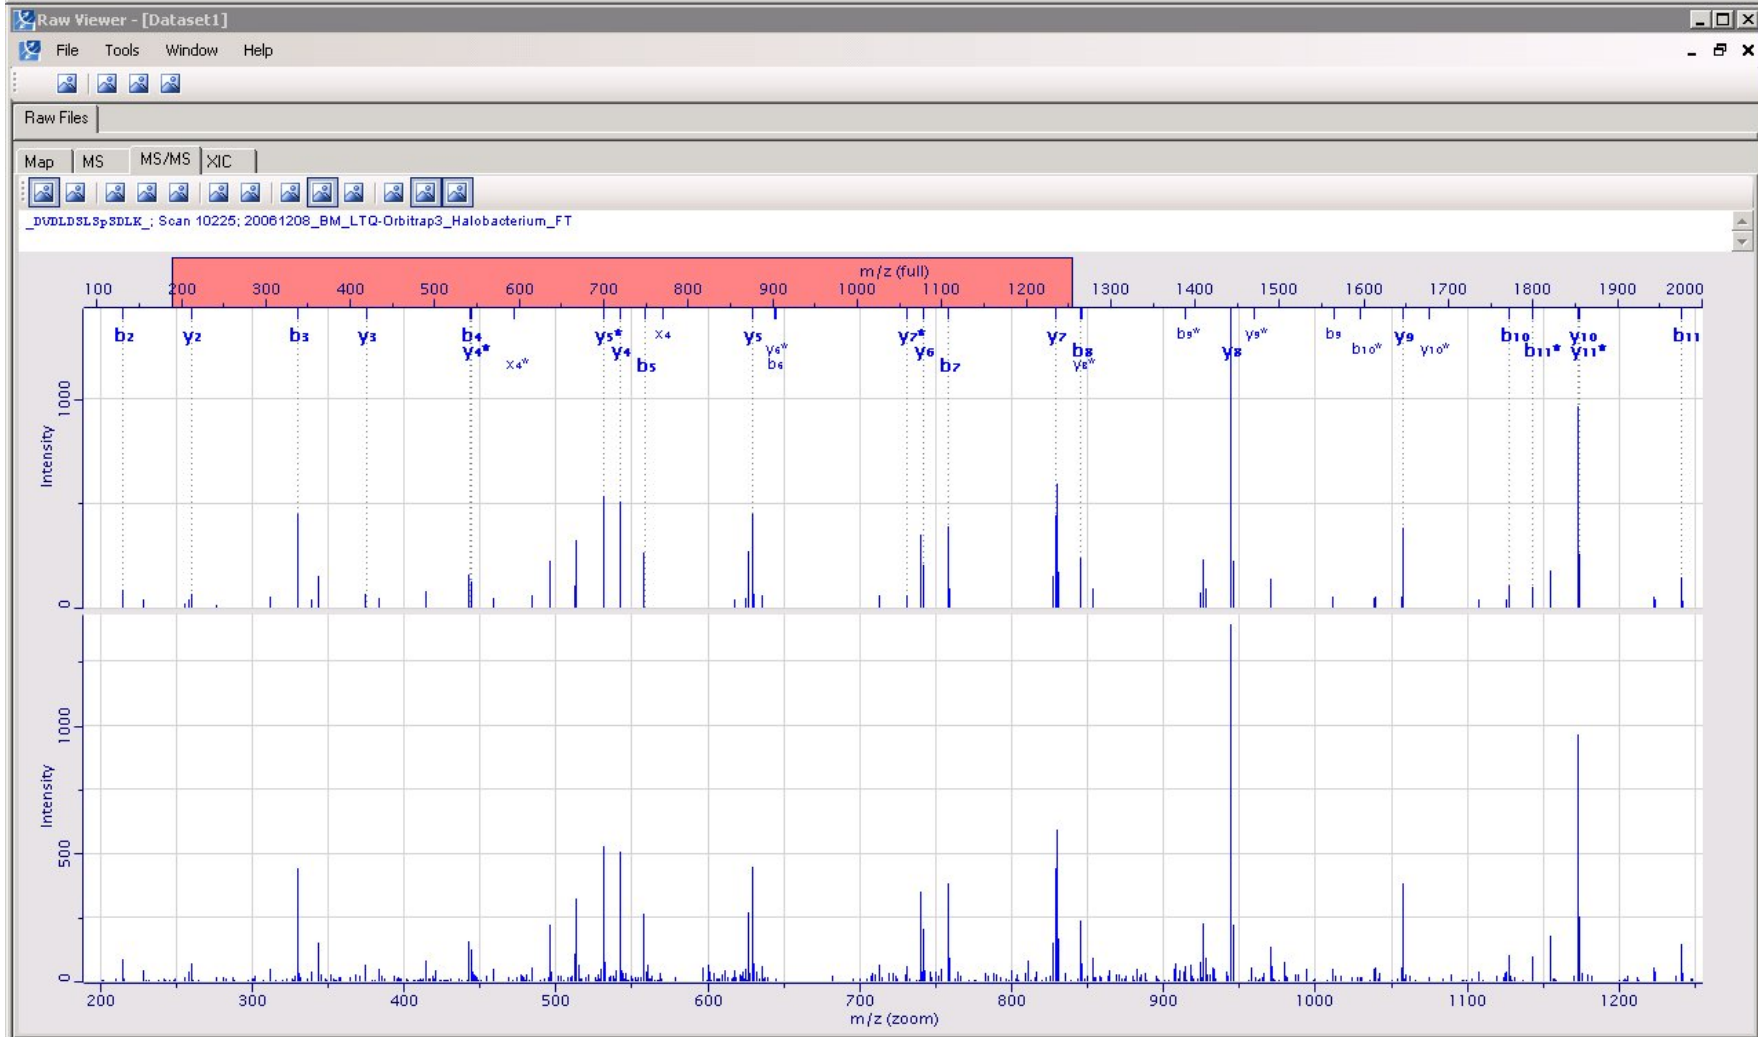



| Result Explorer                                                                                  |              |               |           |                  |                      |                |          |                 |                  |               |        |                    |               |                 |         |
|--------------------------------------------------------------------------------------------------|--------------|---------------|-----------|------------------|----------------------|----------------|----------|-----------------|------------------|---------------|--------|--------------------|---------------|-----------------|---------|
| Summary   Identifications   Modifications   All Peptides   MS Scans   MS/MS Scans   All Proteins |              |               |           |                  |                      |                |          |                 |                  |               |        |                    |               |                 |         |
| Protein Groups   Peptides   Modification-Specific Peptides   Evidence   MS/MS                    |              |               |           |                  |                      |                |          |                 |                  |               |        |                    |               |                 |         |
|                                                                                                  | Sequence     | Modifications | Mass      | Mass Error [ppm] | Mass Fractional Part | Protein Groups | Proteins | Unique (Groups) | Unique (Protein) | Oxidative (M) | phosph | N-Acetyl (Protein) | Slice Average | Slice Std. Dev. | Slice 1 |
| ▶ 81                                                                                             | DTASGNGIHITK | phospho(STY)  | 1292.5762 | -0.41174         | 0.57619619           | 301            | OE2296F  | yes             | yes              | 0             | 1      | 0                  | 5             | 0               |         |

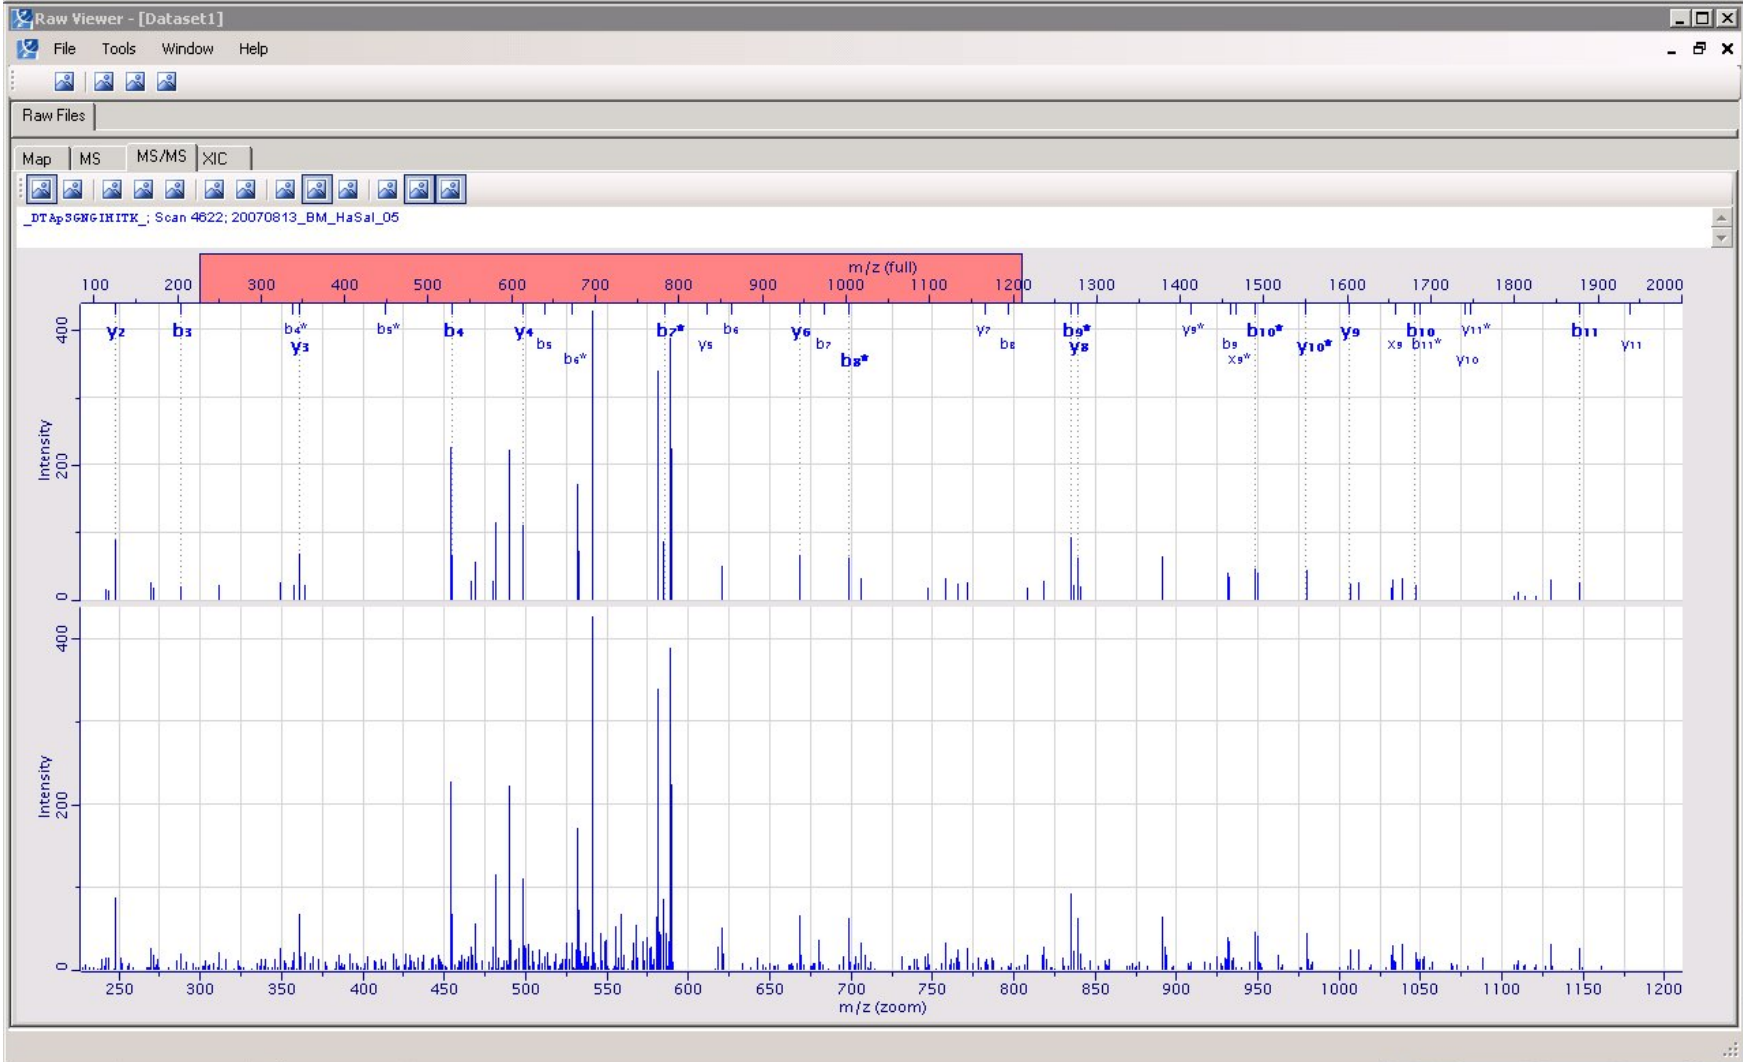

**Result Explorer**

Summary | Identifications | Modifications | All Peptides | MS Scans | MS/MS Scans | All Proteins

Protein Groups | Peptides | Modification-Specific Peptides | Evidence | MS/MS

|      | Sequence | Modifications | Mass      | Mass Error [ppm] | Mass Fractional Part | Protein Groups | Proteins | Unique (Groups) | Unique (Protein) | Oxidatic (M) | phosph | N-Acety (Protein) | Slice Average | Slice Std. Dev. | Slice 1 |
|------|----------|---------------|-----------|------------------|----------------------|----------------|----------|-----------------|------------------|--------------|--------|-------------------|---------------|-----------------|---------|
| ▶ 82 | DLASDIRR | phospho(STY)  | 1024.4703 | 0.27318          | 0.47027456           | 762            | OE3922R  | yes             | yes              | 0            | 1      | 0                 | 3             | 0               |         |

---

**Raw Viewer - [Dataset1]**

File | Tools | Window | Help

Raw Files

Map | MS | MS/MS | XIC

DLASDIRR\_Scan 6227; 20070813\_BM\_HaSal\_03

Slide 82 of 82 "Office Theme" English (U.S.) 104%

Start | I:\Halobacterium\1st+2n... | Raw Viewer - [Dataset1] | Result Explorer | Microsoft PowerPoint - [...]

19:32

**Result Explorer**

Summary | Identifications | Modifications | All Peptides | MS Scans | MS/MS Scans | All Proteins

Protein Groups | Peptides | Modification-Specific Peptides | Evidence | MS/MS

|      | Sequence             | Modifications | Mass      | Mass Error [ppm] | Mass Fractional Part | Protein Groups | Proteins | Unique (Groups) | Unique (Protein) | Oxidatic (M) | phosph | N-Acety (Protein) | Slice Average | Slice Std. Dev. | Slice 1 |
|------|----------------------|---------------|-----------|------------------|----------------------|----------------|----------|-----------------|------------------|--------------|--------|-------------------|---------------|-----------------|---------|
| ▶ 82 | DLAGAVITASHNPPEYNGVK | phospho(STY)  | 2231.0624 | 0.75972          | 0.0623638...         | 837            | OE4190F  | yes             | yes              | 0            | 1      | 0                 | 6.59          | 2.34            | 4       |

---

**Raw Viewer - [Dataset1]**

File | Tools | Window | Help

Raw Files

Map | MS | MS/MS | XIC

DLAGAVITASHNPPEYNGVK; Scan 11314; 20061208\_BM\_LTQ-Orbitrap3\_Halobacterium\_01-03

Intensity vs m/z (full)

Intensity vs m/z (zoom)

---

Slide 82 of 82 | "Office Theme" | English (U.S.) | 102% | DE | 19:33

Start | I:\Halobacterium\1st+2n... | Raw Viewer - [Dataset1] | Result Explorer | Microsoft PowerPoint - [...]

**Result Explorer**

Summary | Identifications | Modifications | All Peptides | MS Scans | MS/MS Scans | All Proteins

Protein Groups | Peptides | Modification-Specific Peptides | Evidence | MS/MS

|      | Sequence    | Modifications | Mass     | Mass Error [ppm] | Mass Fractional Part | Protein Groups | Proteins | Unique (Groups) | Unique (Protein) | Oxidatic (M) | phosph | N-Acetyl (Protein) | Slice Average | Slice Std. Dev. | Slice 1 |
|------|-------------|---------------|----------|------------------|----------------------|----------------|----------|-----------------|------------------|--------------|--------|--------------------|---------------|-----------------|---------|
| ▶ 84 | DAVSFTDTHHS | phospho(STY)  | 1295.482 | -0.060625        | 0.48196145           | 210            | OE1951F  | yes             | yes              | 0            | 1      | 0                  | 4             | 0               |         |

---

**Raw Viewer - [Dataset1]**

File | Tools | Window | Help

Raw Files

Map | MS | MS/MS | XIC

DAVSFTDTHHS; Scan 5115; 20070813\_BM\_HaSal\_04

Intensity

m/z (full)

m/z (zoom)

Slide 83 of 83 "Office Theme" English (U.S.) 102%

Start | I:\Halobacterium\1st+2n... | Raw Viewer - [Dataset1] | Result Explorer | Microsoft PowerPoint - [...]

19:33

**Result Explorer**

Summary | Identifications | Modifications | All Peptides | MS Scans | MS/MS Scans | All Proteins

Protein Groups | Peptides | Modification-Specific Peptides | Evidence | MS/MS

|      | Sequence    | Modifications | Mass      | Mass Error [ppm] | Mass Fractional Part | Protein Groups | Proteins | Unique (Groups) | Unique (Protein) | Oxidatic (M) | phosph | N-Acety (Protein) | Slice Average | Slice Std. Dev. | Slice 1 |
|------|-------------|---------------|-----------|------------------|----------------------|----------------|----------|-----------------|------------------|--------------|--------|-------------------|---------------|-----------------|---------|
| ▶ 85 | DAQEHNISAAR | phospho(STY)  | 1290.5354 | 0.78854          | 0.53539401           | 764            | OE3925R  | yes             | yes              | 0            | 1      | 0                 | 4             | 0               |         |

---

**Raw Viewer - [Dataset1]**

File | Tools | Window | Help

Raw Files

Map | MS | MS/MS | XIC

DAQEHN1p2AAR; Scan 3339; 20070813\_BM\_HaSal\_04

Slide 85 of 85 "Office Theme" English (U.S.) 104%

Start | I:\Halobacterium\1st+2n... | Raw Viewer - [Dataset1] | Result Explorer | Microsoft PowerPoint - [...]

19:34

**Result Explorer**

Summary | Identifications | Modifications | All Peptides | MS Scans | MS/MS Scans | All Proteins

Protein Groups | Peptides | Modification-Specific Peptides | Evidence | MS/MS

| Sequence                      | Modifications            | Mass      | Mass Error [ppm] | Mass Fractional Part | Protein Groups | Proteins | Unique (Groups) | Unique (Protein) | Oxidatic (M) | phosph | N-Acety (Protein) | Slice Average | Slice Std. Dev. | Slice 1 |
|-------------------------------|--------------------------|-----------|------------------|----------------------|----------------|----------|-----------------|------------------|--------------|--------|-------------------|---------------|-----------------|---------|
| DAIAGSTVSNEEMTPFESIDHISEPVITK | Oxidation (M), phosph... | 3212.4472 | -0.57828         | 0.44723279           | 994            | OE4729R  | yes             | yes              | 1            | 1      | 0                 | 8             | 0               |         |

---

**Raw Viewer - [Dataset1]**

File | Tools | Window | Help

Raw Files

Map | MS | MS/MS | XIC

DAIAGSTVSNEEMTPFESIDHISEPVITK; Scan 10068; 20070813\_BM\_HaSa1\_08

Intensity

m/z (full)

m/z (zoom)

Slide 86 of 86 "Office Theme" English (U.S.) 104%

Start | I:\Halobacterium\1st+2n... | Raw Viewer - [Dataset1] | Result Explorer | Microsoft PowerPoint - [...]

19:34

Result Explorer

Summary | Identifications | Modifications | All Peptides | MS Scans | MS/MS Scans | All Proteins

Protein Groups | Peptides | Modification-Specific Peptides | Evidence | MS/MS

|      | Sequence  | Modifications | Mass     | Mass Error [ppm] | Mass Fractional Part | Protein Groups | Proteins | Unique (Groups) | Unique (Protein) | Oxidative (M) | phosph | N-Acetyl (Protein) | Slice Average | Slice Std. Dev. | Slice 1 | Slice 2 |
|------|-----------|---------------|----------|------------------|----------------------|----------------|----------|-----------------|------------------|---------------|--------|--------------------|---------------|-----------------|---------|---------|
| ▶ 57 | AYADTHPAR | phospho(STY)  | 1080.439 | -3.593           | 0.43897443           | 832            | OE4171R  | yes             | yes              | 0             | 1      | 0                  | 2             | 0               |         | 1       |

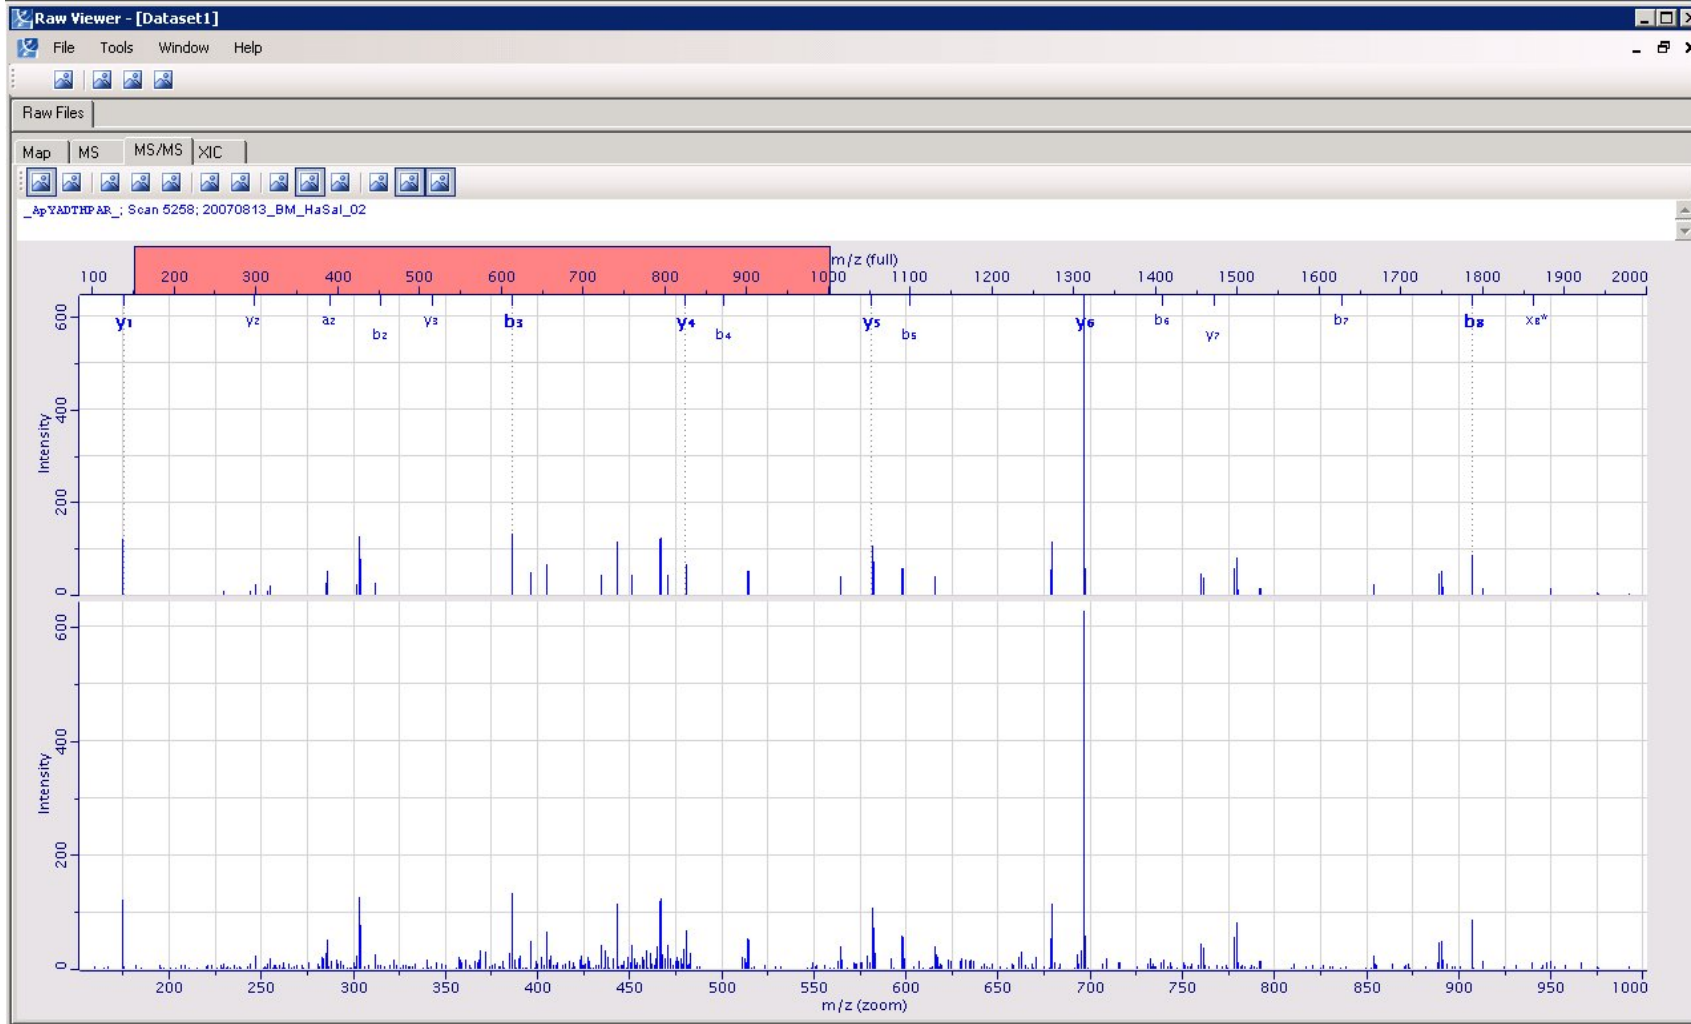

| Result Explorer                                                                                  |              |               |           |                  |                      |                |          |                 |                  |              |        |                   |               |                 |         |         |         |
|--------------------------------------------------------------------------------------------------|--------------|---------------|-----------|------------------|----------------------|----------------|----------|-----------------|------------------|--------------|--------|-------------------|---------------|-----------------|---------|---------|---------|
| Summary   Identifications   Modifications   All Peptides   MS Scans   MS/MS Scans   All Proteins |              |               |           |                  |                      |                |          |                 |                  |              |        |                   |               |                 |         |         |         |
| Protein Groups   Peptides   Modification-Specific Peptides   Evidence   MS/MS                    |              |               |           |                  |                      |                |          |                 |                  |              |        |                   |               |                 |         |         |         |
|                                                                                                  | Sequence     | Modifications | Mass      | Mass Error [ppm] | Mass Fractional Part | Protein Groups | Proteins | Unique [Groups] | Unique [Protein] | Oxidatic (M) | phosph | N-Acety (Protein) | Slice Average | Slice Std. Dev. | Slice 1 | Slice 2 | Slice 3 |
| ▶                                                                                                | AVADAVRSTLGP | phospho(STY)  | 1363.6861 | 0.036837         | 0.68608099           | 764            | DE3925R  | yes             | yes              | 0            | 1      | 0                 | 4             | 0               |         |         |         |

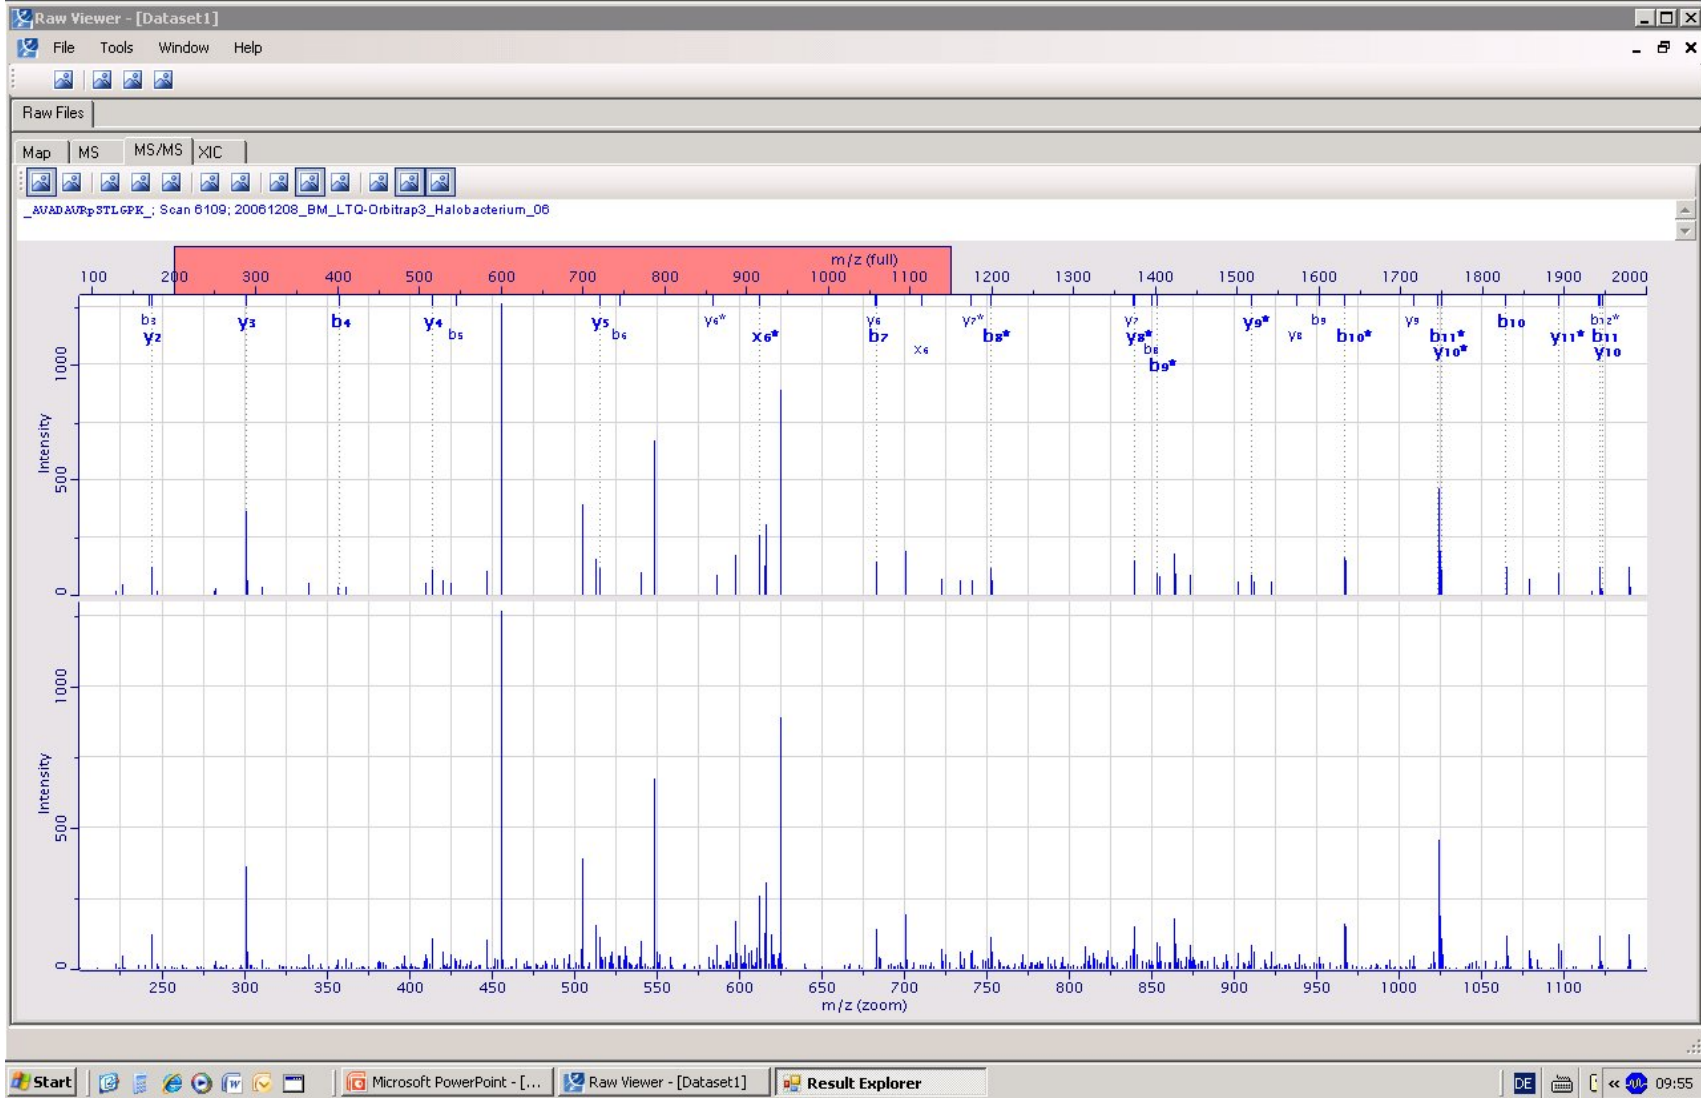



| Result Explorer                                                                                  |                    |               |          |                  |                      |                |          |                 |                  |              |        |                   |               |                 |         |         |         |
|--------------------------------------------------------------------------------------------------|--------------------|---------------|----------|------------------|----------------------|----------------|----------|-----------------|------------------|--------------|--------|-------------------|---------------|-----------------|---------|---------|---------|
| Summary   Identifications   Modifications   All Peptides   MS Scans   MS/MS Scans   All Proteins |                    |               |          |                  |                      |                |          |                 |                  |              |        |                   |               |                 |         |         |         |
| Protein Groups   Peptides   Modification-Specific Peptides   Evidence   MS/MS                    |                    |               |          |                  |                      |                |          |                 |                  |              |        |                   |               |                 |         |         |         |
|                                                                                                  | Sequence           | Modifications | Mass     | Mass Error [ppm] | Mass Fractional Part | Protein Groups | Proteins | Unique (Groups) | Unique (Protein) | Oxidatic (M) | phosph | N-Acety (Protein) | Slice Average | Slice Std. Dev. | Slice 1 | Slice 2 | Slice 3 |
| ▶                                                                                                | AQDRATEGEQTAEIAIDR | phospho(STY)  | 2040.875 | -0.36124         | 0.87495699           | 1049           | DE5243F  | yes             | yes              | 0            | 1      | 0                 | 5             | 0               |         |         |         |

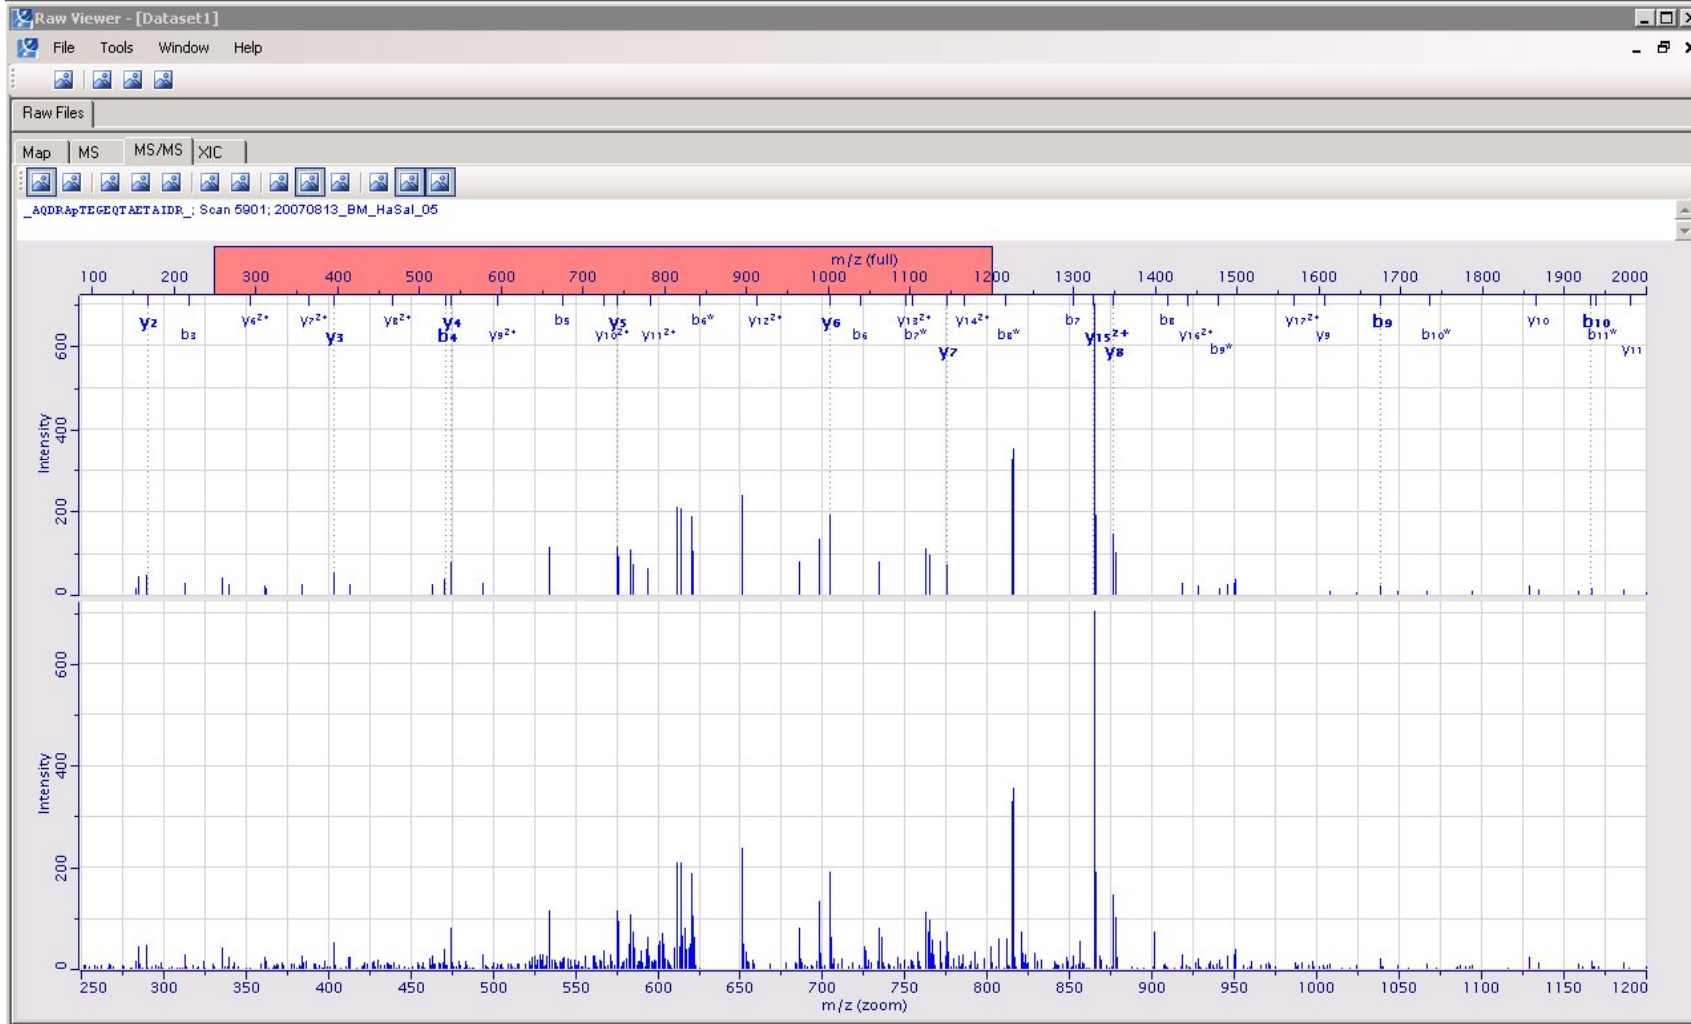

| Result Explorer                                                                                  |               |               |           |                  |                      |                |          |                 |                  |              |        |                   |               |                 |         |         |         |
|--------------------------------------------------------------------------------------------------|---------------|---------------|-----------|------------------|----------------------|----------------|----------|-----------------|------------------|--------------|--------|-------------------|---------------|-----------------|---------|---------|---------|
| Summary   Identifications   Modifications   All Peptides   MS Scans   MS/MS Scans   All Proteins |               |               |           |                  |                      |                |          |                 |                  |              |        |                   |               |                 |         |         |         |
| Protein Groups   Peptides   Modification-Specific Peptides   Evidence   MS/MS                    |               |               |           |                  |                      |                |          |                 |                  |              |        |                   |               |                 |         |         |         |
|                                                                                                  | Sequence      | Modifications | Mass      | Mass Error [ppm] | Mass Fractional Part | Protein Groups | Proteins | Unique [Groups] | Unique [Protein] | Oxidatic (M) | phosph | N-Acety (Protein) | Slice Average | Slice Std. Dev. | Slice 1 | Slice 2 | Slice 3 |
| ▶                                                                                                | ANLGSDRGPYYPK | phospho(STY)  | 1516.6712 | 0.16534          | 0.67115921           | 408            | DE2633F  | yes             | yes              | 0            | 1      | 0                 | 4.5           | 0.5             |         |         |         |

Raw Viewer - [Dataset1]

File Tools Window Help

Raw Files

Map MS MS/MS XIC

ANLGSDRGPYYPK; Scan 5965; 20061208\_BM\_LTQ-Orbitrap3\_Halobacterium\_06

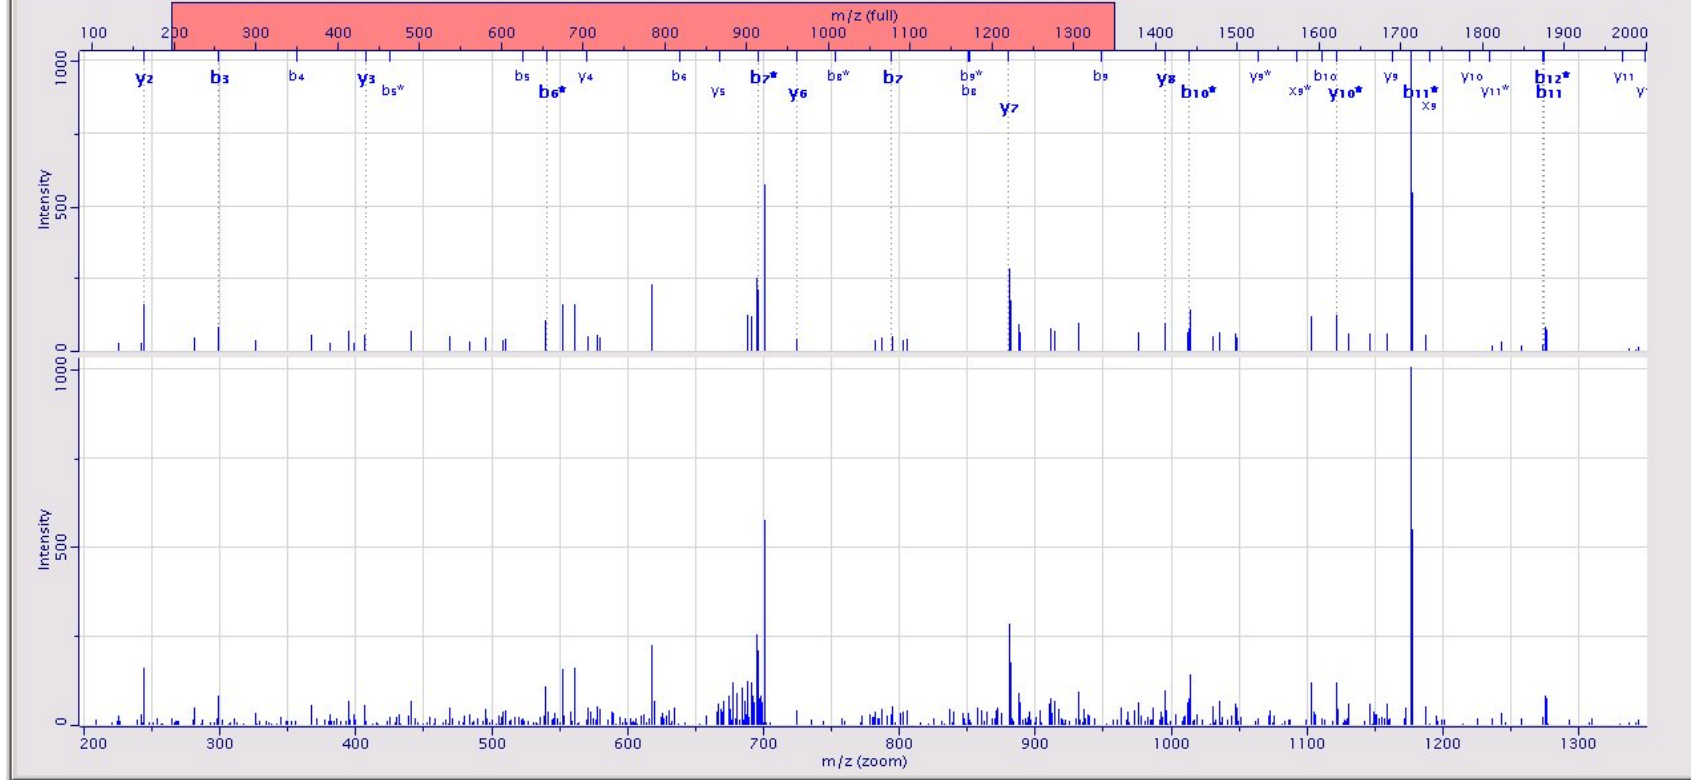

| Result Explorer                                                                                  |               |               |           |                  |                      |                |          |                 |                  |              |        |                   |               |                 |         |         |         |
|--------------------------------------------------------------------------------------------------|---------------|---------------|-----------|------------------|----------------------|----------------|----------|-----------------|------------------|--------------|--------|-------------------|---------------|-----------------|---------|---------|---------|
| Summary   Identifications   Modifications   All Peptides   MS Scans   MS/MS Scans   All Proteins |               |               |           |                  |                      |                |          |                 |                  |              |        |                   |               |                 |         |         |         |
| Protein Groups   Peptides   Modification-Specific Peptides   Evidence   MS/MS                    |               |               |           |                  |                      |                |          |                 |                  |              |        |                   |               |                 |         |         |         |
|                                                                                                  | Sequence      | Modifications | Mass      | Mass Error [ppm] | Mass Fractional Part | Protein Groups | Proteins | Unique (Groups) | Unique (Protein) | Oxidatic (M) | phosph | N-Acety (Protein) | Slice Average | Slice Std. Dev. | Slice 1 | Slice 2 | Slice 3 |
| ▶                                                                                                | ANDSSTDGRFSEK | phospho(STY)  | 1492.5831 | 0.4681           | 0.58313206           | 351            | DE2458R  | yes             | yes              | 0            | 1      | 0                 | 4             | 0               |         |         |         |

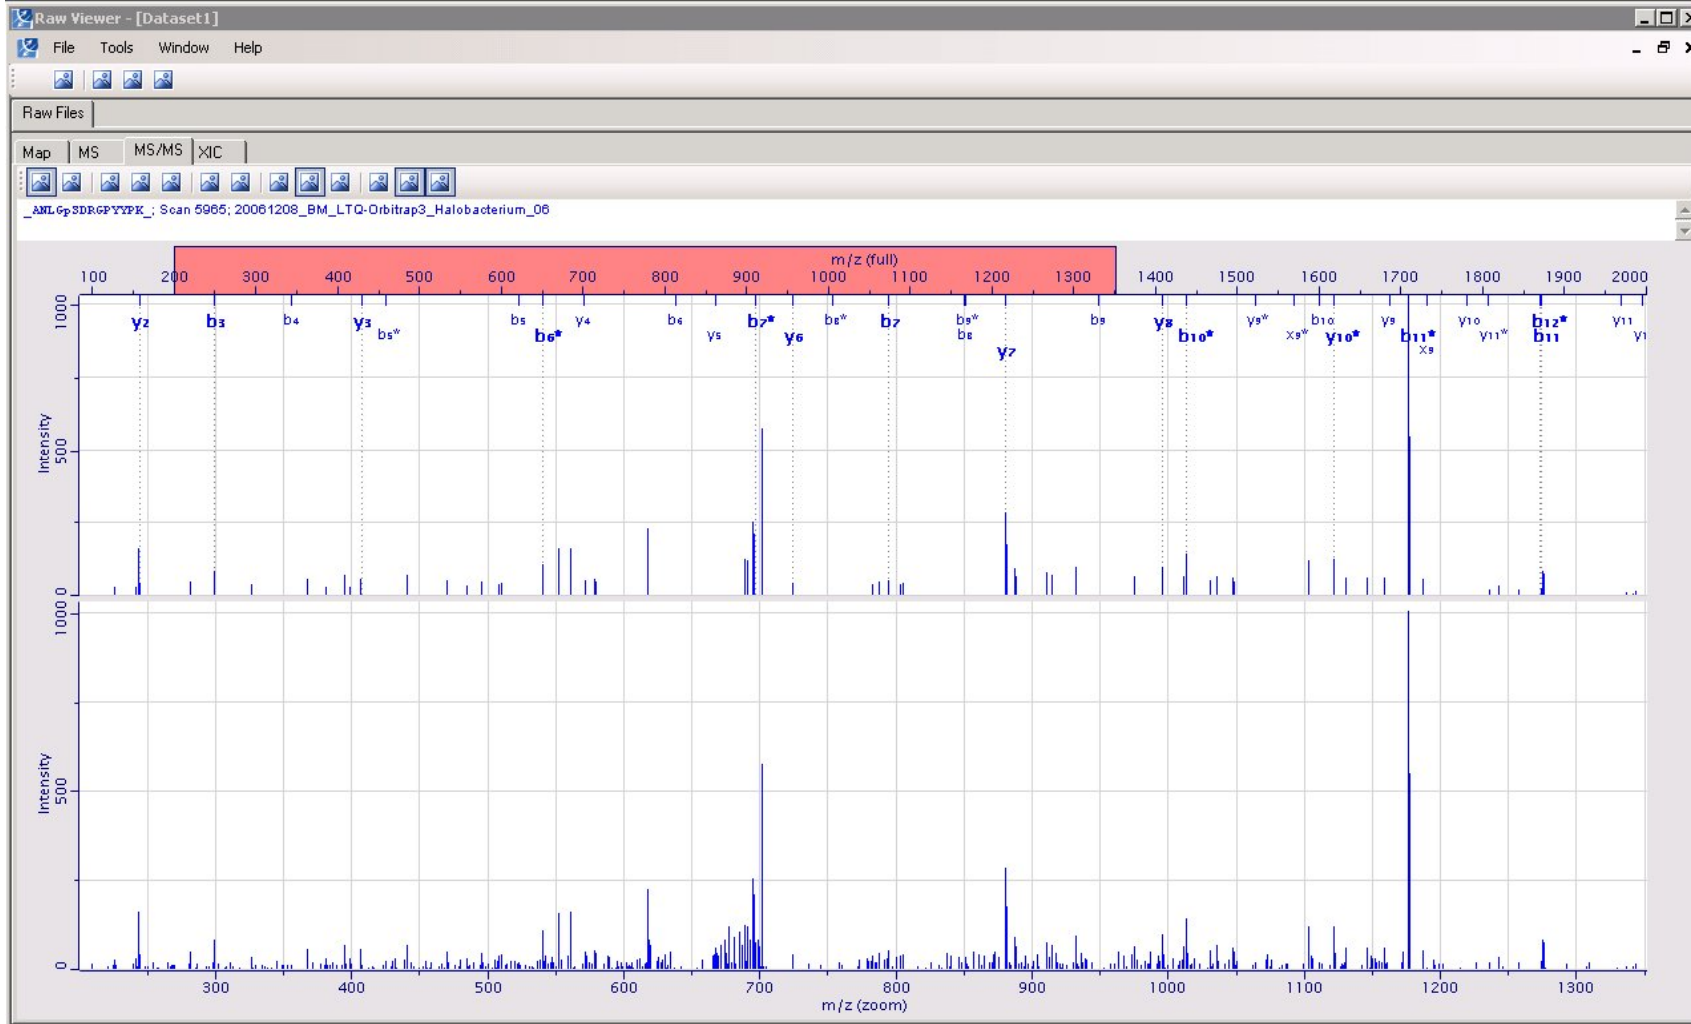

| Result Explorer                                                                                  |             |               |           |                  |                      |                |          |                 |                  |              |        |                   |               |                 |         |         |         |
|--------------------------------------------------------------------------------------------------|-------------|---------------|-----------|------------------|----------------------|----------------|----------|-----------------|------------------|--------------|--------|-------------------|---------------|-----------------|---------|---------|---------|
| Summary   Identifications   Modifications   All Peptides   MS Scans   MS/MS Scans   All Proteins |             |               |           |                  |                      |                |          |                 |                  |              |        |                   |               |                 |         |         |         |
| Protein Groups   Peptides   Modification-Specific Peptides   Evidence   MS/MS                    |             |               |           |                  |                      |                |          |                 |                  |              |        |                   |               |                 |         |         |         |
|                                                                                                  | Sequence    | Modifications | Mass      | Mass Error [ppm] | Mass Fractional Part | Protein Groups | Proteins | Unique [Groups] | Unique [Protein] | Oxidatic (M) | phosph | N-Acety (Protein) | Slice Average | Slice Std. Dev. | Slice 1 | Slice 2 | Slice 3 |
| ▶                                                                                                | AKSPEPEFGLR | phospho(STY)  | 1309.6068 | 0.25532          | 0.60676804           | 620            | OE3407F  | yes             | yes              | 0            | 1      | 0                 | 4             | 0               |         |         |         |

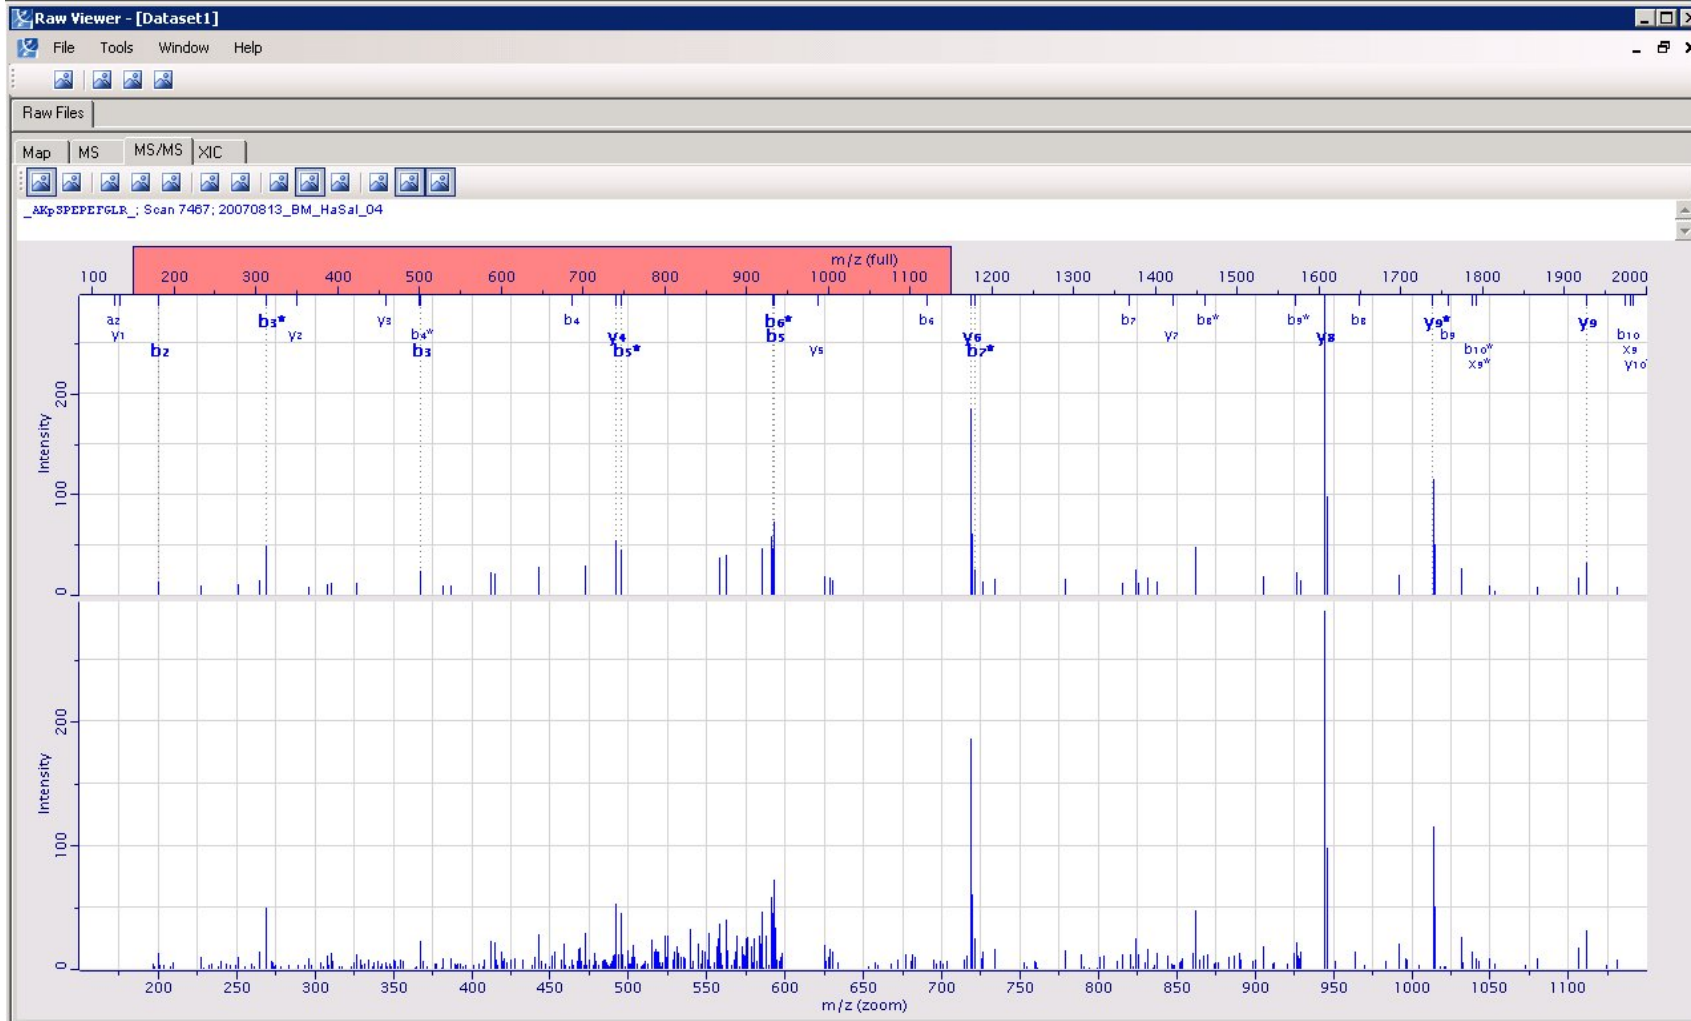

Result Explorer

Summary | Identifications | Modifications | All Peptides | MS Scans | MS/MS Scans | All Proteins

Protein Groups | Peptides | Modification-Specific Peptides | Evidence | MS/MS

|   | Sequence              | Modifications | Mass      | Mass Error [ppm] | Mass Fractional Part | Protein Groups | Proteins | Unique (Groups) | Unique (Protein) | Oxidatic (M) | phosph | N-Acety (Protein) | Slice Average | Slice Std. Dev. | Slice 1 | Slice 2 | Slice 3 |
|---|-----------------------|---------------|-----------|------------------|----------------------|----------------|----------|-----------------|------------------|--------------|--------|-------------------|---------------|-----------------|---------|---------|---------|
| ▶ | AGVPAVMVTASHNPSQYNGVK | phospho(STY)  | 2206.0242 | -0.18251         | 0.02420418           | 808            | DE4094F  | yes             | yes              | 0            | 1      | 0                 | 4             | 2.71            | 2       | 1       |         |

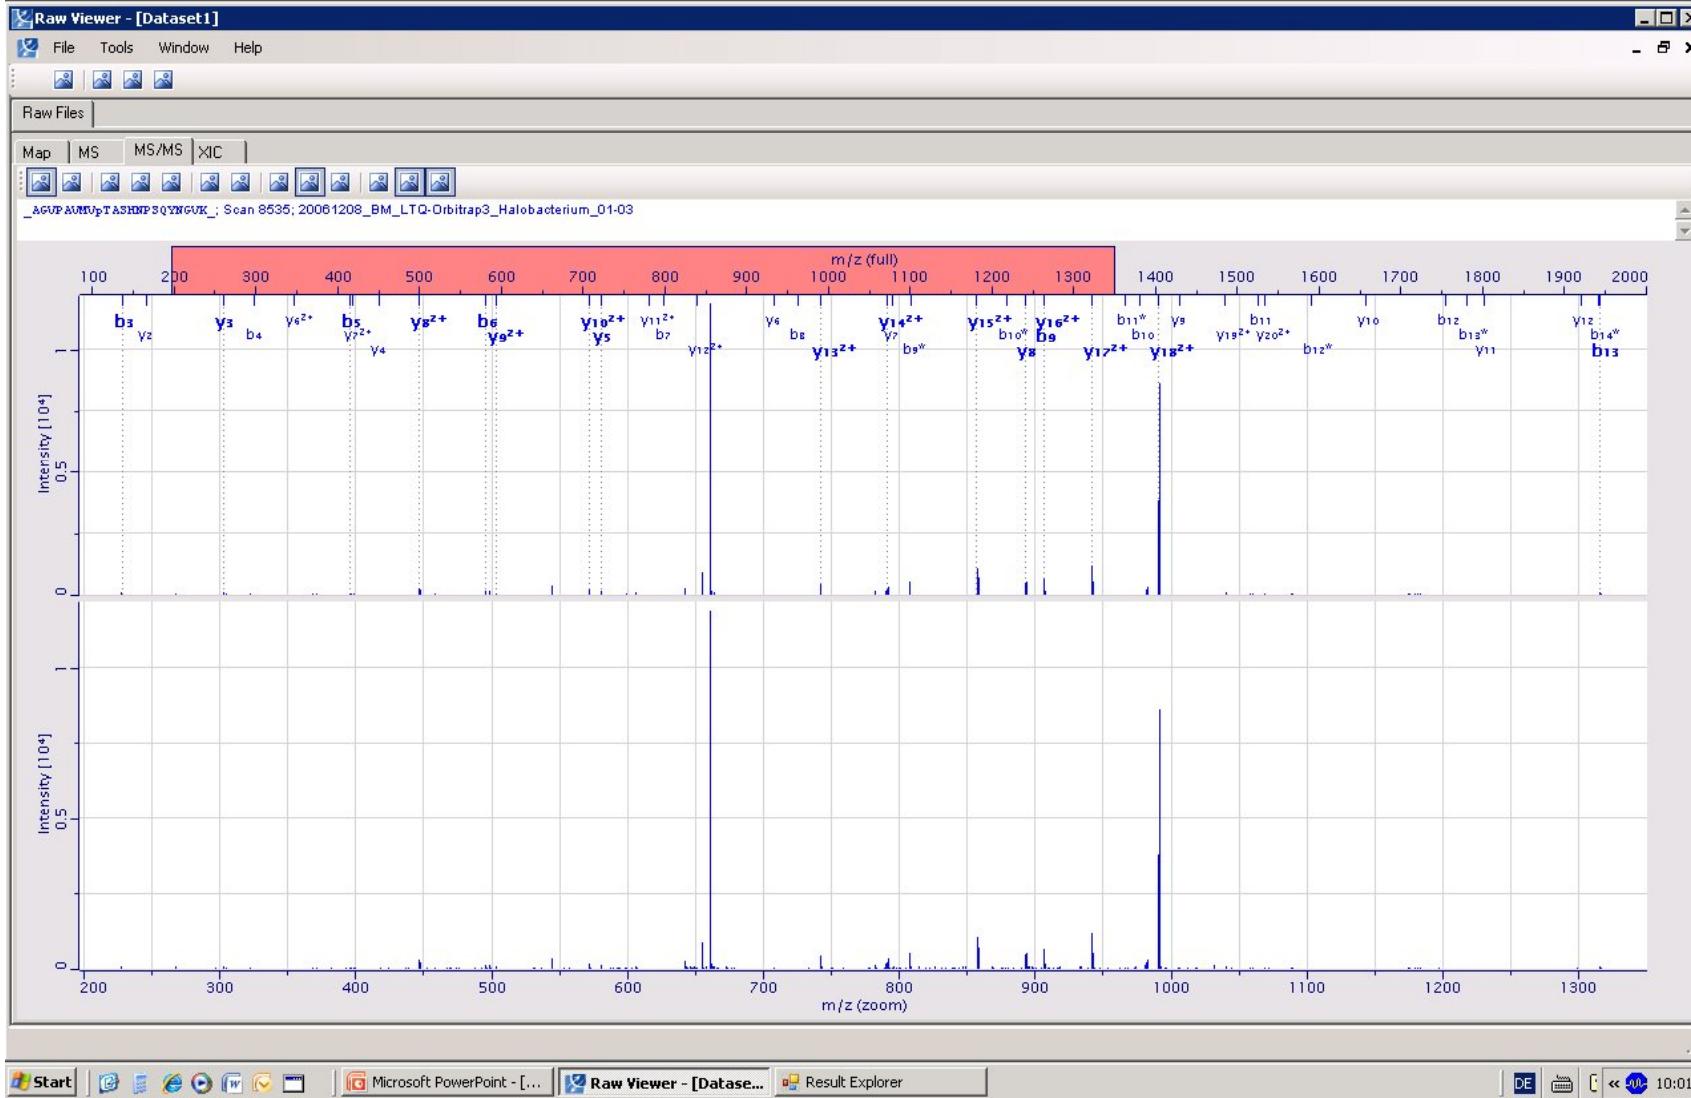

| Result Explorer                                                                                  |                       |                              |           |                  |                      |                |          |                 |                  |              |        |                   |               |                 |         |         |         |
|--------------------------------------------------------------------------------------------------|-----------------------|------------------------------|-----------|------------------|----------------------|----------------|----------|-----------------|------------------|--------------|--------|-------------------|---------------|-----------------|---------|---------|---------|
| Summary   Identifications   Modifications   All Peptides   MS Scans   MS/MS Scans   All Proteins |                       |                              |           |                  |                      |                |          |                 |                  |              |        |                   |               |                 |         |         |         |
| Protein Groups   Peptides   Modification-Specific Peptides   Evidence   MS/MS                    |                       |                              |           |                  |                      |                |          |                 |                  |              |        |                   |               |                 |         |         |         |
|                                                                                                  | Sequence              | Modifications                | Mass      | Mass Error [ppm] | Mass Fractional Part | Protein Groups | Proteins | Unique [Groups] | Unique [Protein] | Oxidatic (M) | phosph | N-Acety (Protein) | Slice Average | Slice Std. Dev. | Slice 1 | Slice 2 | Slice 3 |
| ▶ 44                                                                                             | AGVPAVMVTASHNPSQYNGVK | Oxidation (M),phospho(S,T,Y) | 2222.0191 | -1.4297          | 0.0191295...         | 808            | DE4094F  | yes             | yes              | 1            | 1      | 0                 | 5.17          | 2.37            | 1       | 2       | 1       |

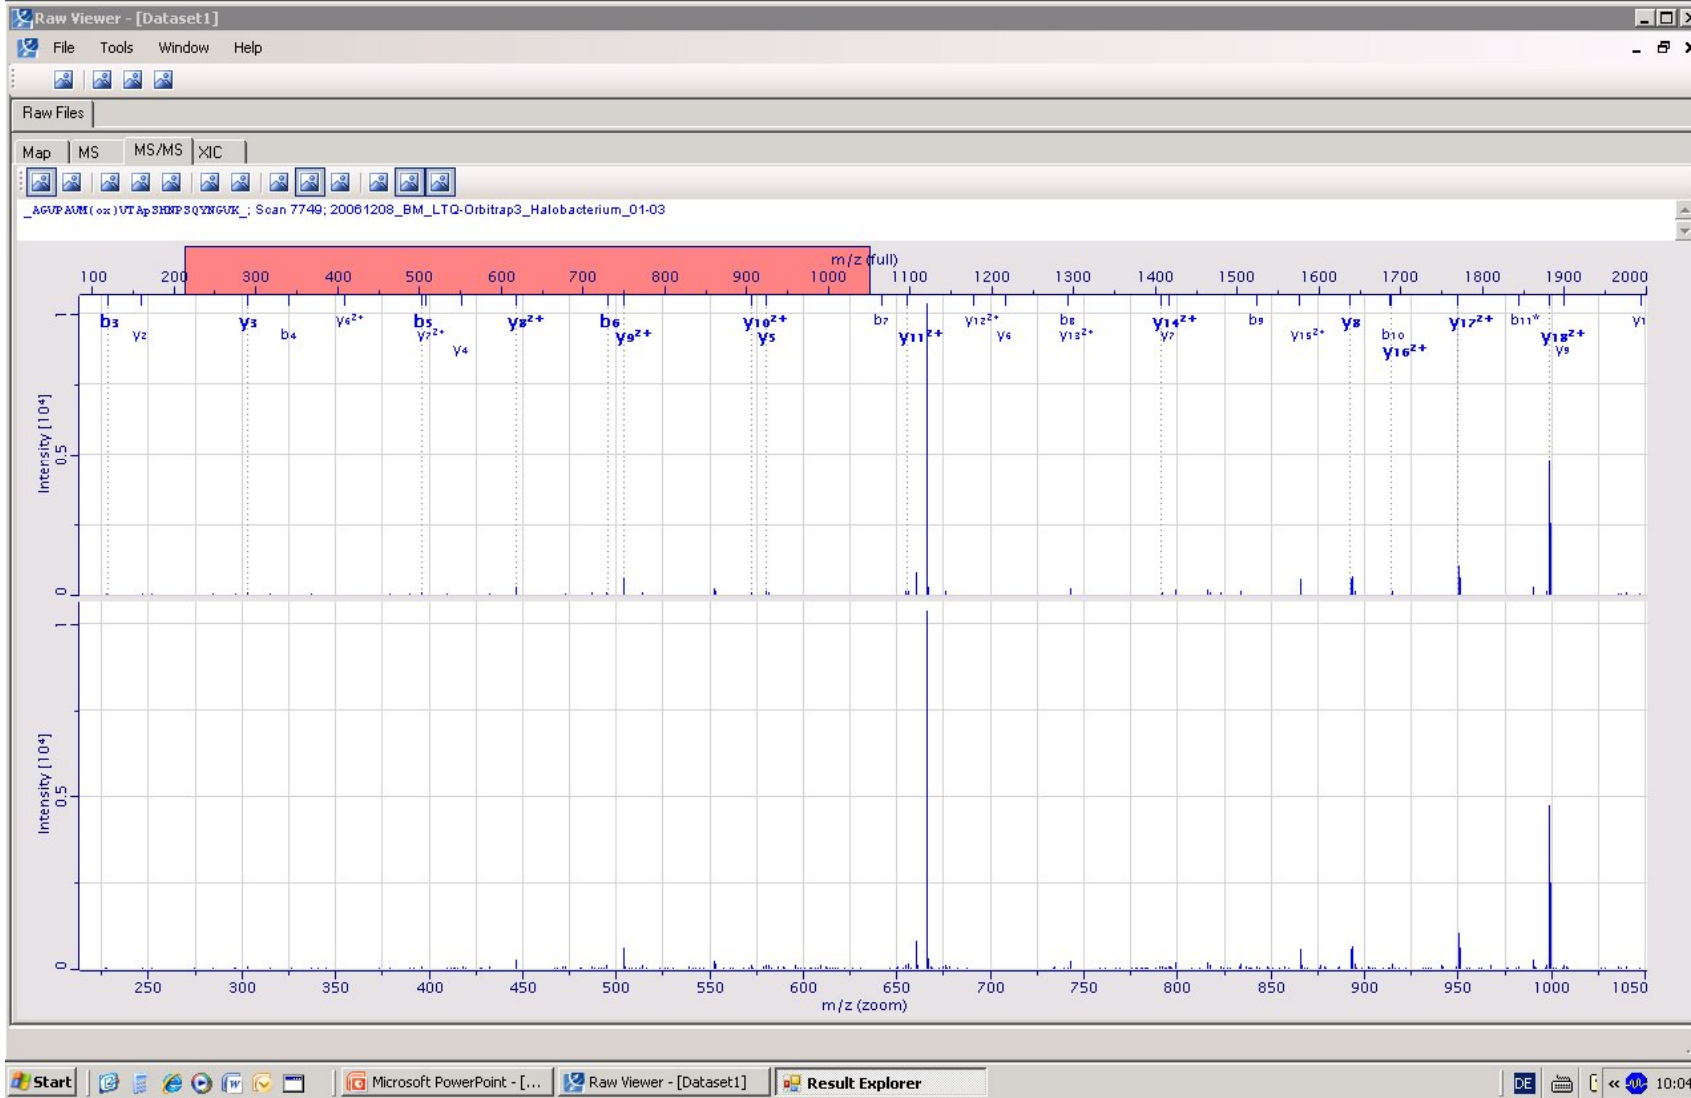

| Result Explorer                                                                                  |                     |               |           |                  |                      |                |          |                 |                  |              |        |                   |               |                 |         |         |         |
|--------------------------------------------------------------------------------------------------|---------------------|---------------|-----------|------------------|----------------------|----------------|----------|-----------------|------------------|--------------|--------|-------------------|---------------|-----------------|---------|---------|---------|
| Summary   Identifications   Modifications   All Peptides   MS Scans   MS/MS Scans   All Proteins |                     |               |           |                  |                      |                |          |                 |                  |              |        |                   |               |                 |         |         |         |
| Protein Groups   Peptides   Modification-Specific Peptides   Evidence   MS/MS                    |                     |               |           |                  |                      |                |          |                 |                  |              |        |                   |               |                 |         |         |         |
|                                                                                                  | Sequence            | Modifications | Mass      | Mass Error [ppm] | Mass Fractional Part | Protein Groups | Proteins | Unique (Groups) | Unique (Protein) | Oxidatic (M) | phosph | N-Acety (Protein) | Slice Average | Slice Std. Dev. | Slice 1 | Slice 2 | Slice 3 |
| ▶                                                                                                | AAGIVTDEGGMTSHAIVSR | phospho(STY)  | 2021.9242 | 0.59381          | 0.92415578           | 87             | OE1500R  | yes             | yes              | 0            | 1      | 0                 | 3.64          | 1.57            | 24      | 2       |         |

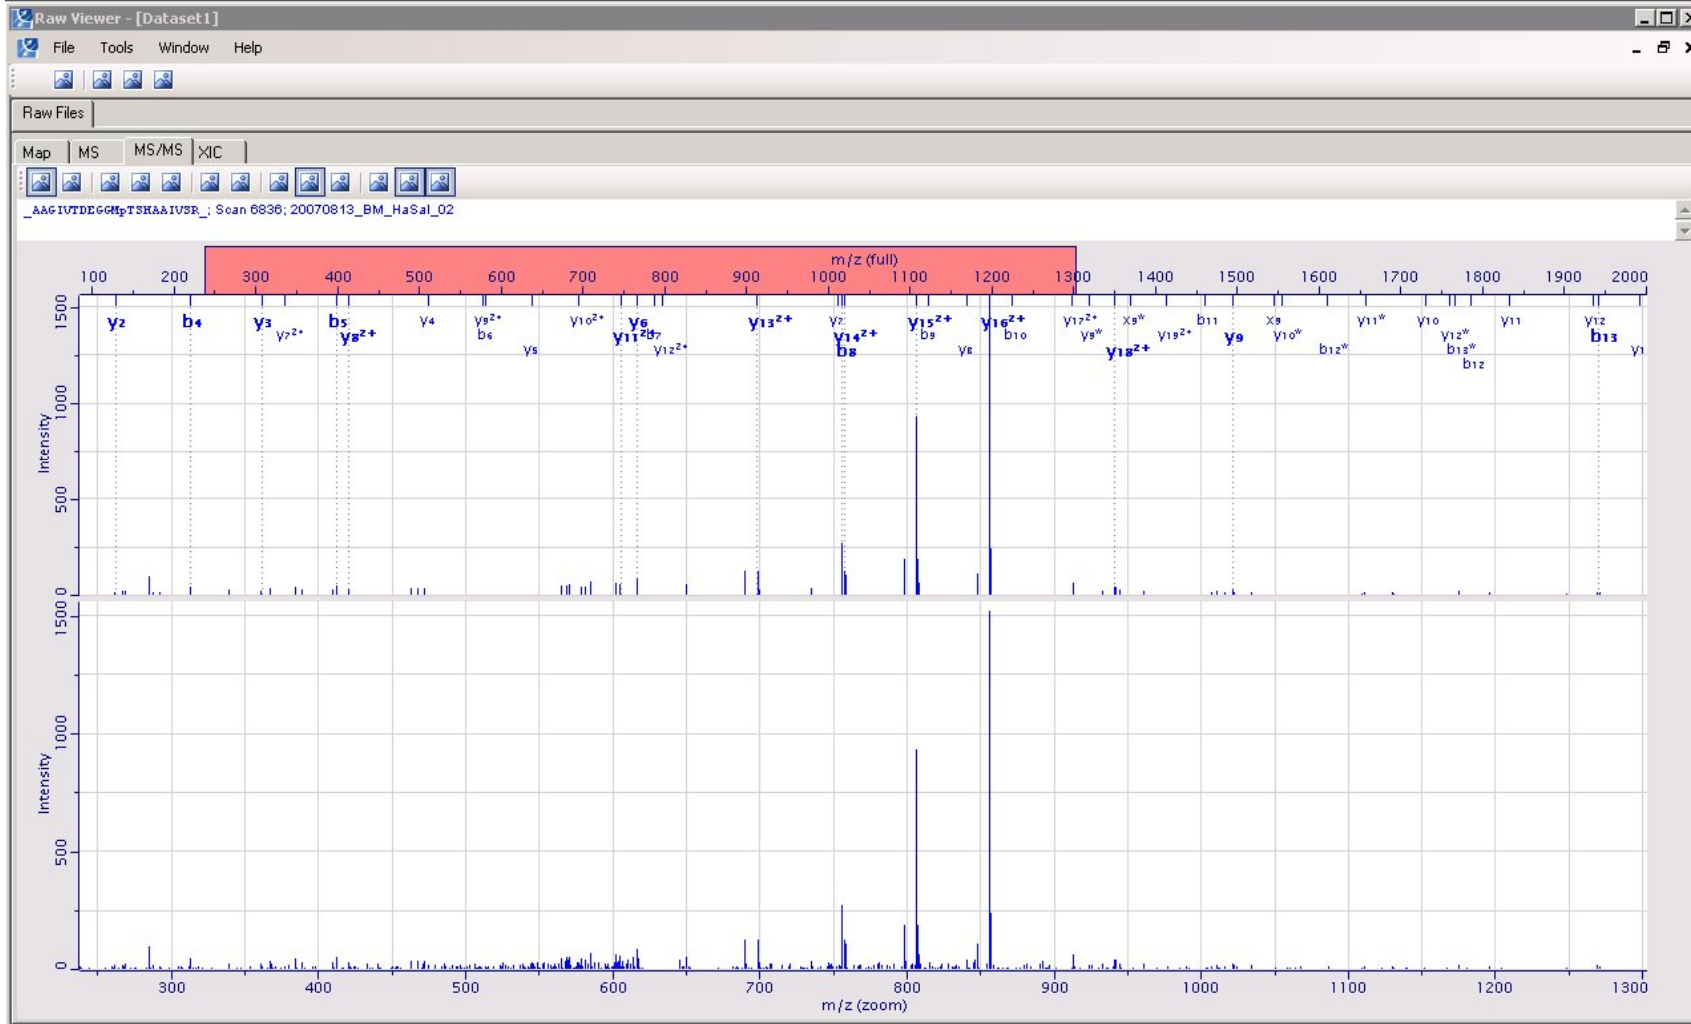

| Result Explorer                                                                                  |                     |                              |           |                  |                      |                |          |                 |                  |              |        |                   |               |                 |         |         |         |
|--------------------------------------------------------------------------------------------------|---------------------|------------------------------|-----------|------------------|----------------------|----------------|----------|-----------------|------------------|--------------|--------|-------------------|---------------|-----------------|---------|---------|---------|
| Summary   Identifications   Modifications   All Peptides   MS Scans   MS/MS Scans   All Proteins |                     |                              |           |                  |                      |                |          |                 |                  |              |        |                   |               |                 |         |         |         |
| Protein Groups   Peptides   Modification-Specific Peptides   Evidence   MS/MS                    |                     |                              |           |                  |                      |                |          |                 |                  |              |        |                   |               |                 |         |         |         |
|                                                                                                  | Sequence            | Modifications                | Mass      | Mass Error [ppm] | Mass Fractional Part | Protein Groups | Proteins | Unique [Groups] | Unique [Protein] | Oxidatic (M) | phosph | N-Acety (Protein) | Slice Average | Slice Std. Dev. | Slice 1 | Slice 2 | Slice 3 |
| ▶                                                                                                | AAGIVTDEGGMTSHAIVSR | Oxidation (M),phospho(S,T,Y) | 2037.9191 | 0.54556          | 0.91908118           | 87             | OE1500R  | yes             | yes              | 1            | 1      | 0                 | 4.12          | 1.78            | 9       | 26      | 45      |

Raw Viewer - [Dataset1]

File Tools Window Help

Raw Files

Map MS MS/MS XIC

AAGIVTDEGGMT(ox)P-TSHAIVSR; Scan 4666; 20061206\_BM\_LTQ-Orbitrap2\_Halobacterium\_05

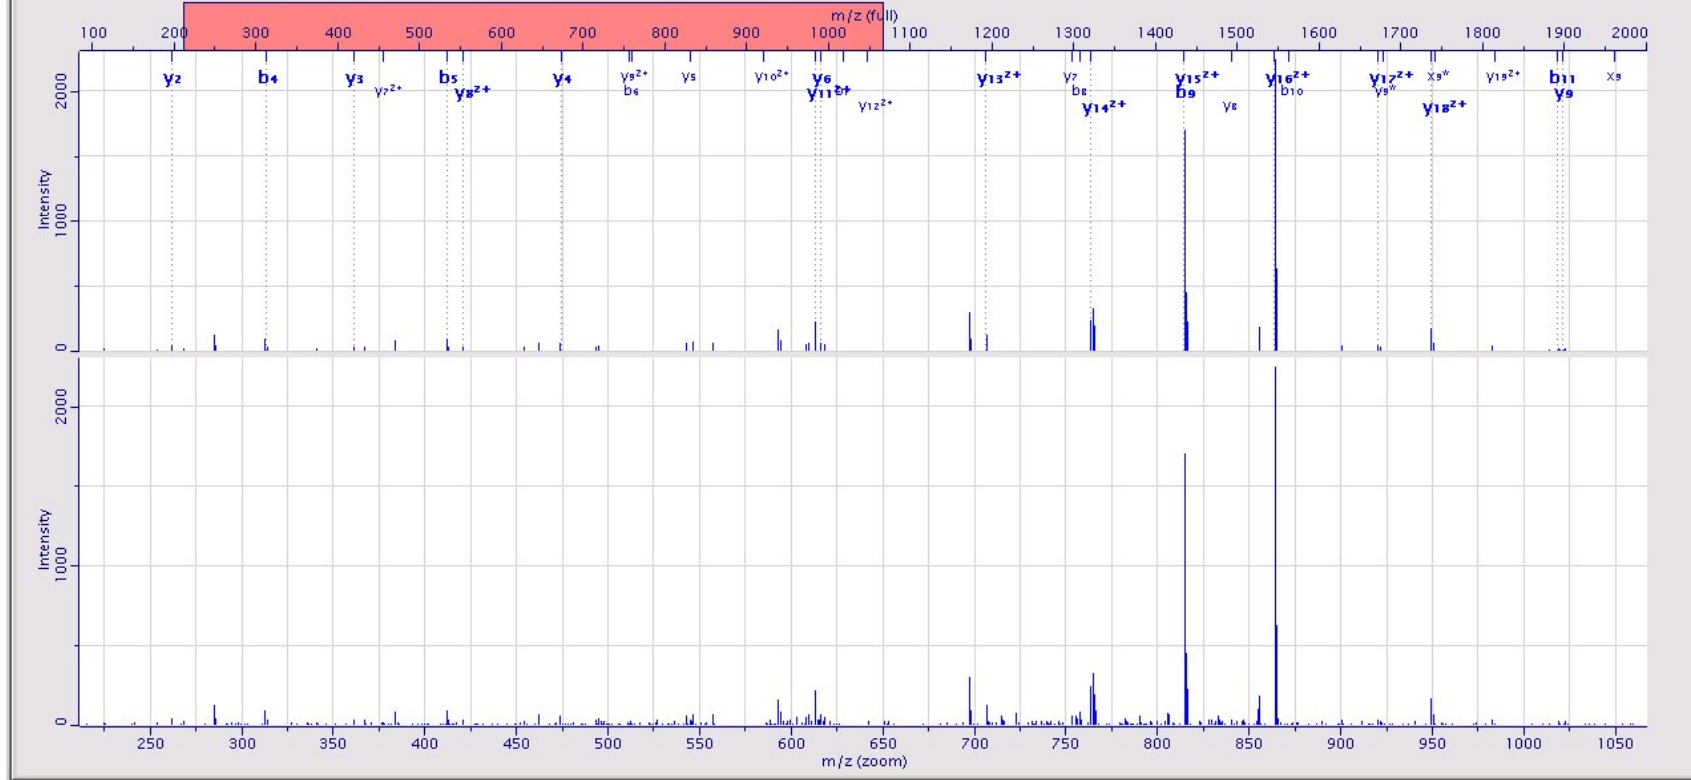

Supplement: pone.0004777.s005.pdf [file pone.0004777.s005.pdf]
