# Supplementary material for: Ser/Thr/Tyr Protein Phosphorylation in the Archaeon Halobacterium salinarum—A Representative of the Third Domain of Life
Source: PLoS One. 2009 Mar 10;4(3):e4777. doi: 10.1371/journal.pone.0004777 (PMC2652253; doi:10.1371/journal.pone.0004777)
Supplement: Table S1 — List of the identified phosphoproteins in H. salinarum. The H. salinarum phosphopeptides identified from Wt and ΔserB are presented with information regarding their Mascot score, identified phosphosite (if could be determined), protein and site conservation among all domains of life, and function or/and pathway in which the phosphoproteins are involved. pX: determined phosphosite; p[…]: possible phosphosite; (M): cleaved initial methionine; Ac: N-terminal acetylation. (0.07 MB XLS) [file pone.0004777.s002.xls]

## Sheet: Sheet1
Database id/gene	Protein description	Phosphopeptide	Motif	Mascot Score	PTM Score	z	m/z	PPM Error	Phosphosite localization probability	Pathway/Function	Homologs	Protein conservation	Phosphosite conservation	Experiment
Conserved hypothetical protein
OE1442R	Conserved hypothetical protein	HGDADNTSTTSSASSp[S74S75S76S77T78S79T80]GASSEPQPPVEEGEIR	S74, S76, S77, T78, T80:CK1 ; S75: CK1; GSK3; S79: CK1; GSK3	50.27	113.33	3	1273.2	-0.73799	HGDADNTSTTSSASS(0.002)S(0.049)S(0.28)S(0.28)S(0.28)T(0.049)S(0.049)T(0.009)GASSEPQPPVEEGEIR	Pfam: TRAM: small uncharacterized archaeal proteins that are predicted to have a role in the regulation of tRNA modification and/or translation.	IF2B_THEVO	Archaea, bacteria	S74, S75, S76, S77, T78, S79: H. salinarum; T80: H. salinarum, T. volcanium	ΔserB
OE1584R	Conserved hypothetical protein	RNELNQLApS49SR	GSK3	44.44	136.96	2	684.325	0.45679	RNELNQLAS(1)SR	By similarity: putative phoshposerine phosphatase	MUKB_HAEIN	All domains of life	All domains of life	ΔserB
OE2249R	Conserved hypothetical protein	VELTHLQpS303R	CK1	37.17	145.18	2	581.784	0.12658	VELTHLQS(1)R	By similarity: ribosomal large subunit assembly and maintenance/protein binding	MDN1_YEAST ; PPN_DROME	Bacteria, eukarya, in a few archaea	Bacteria, eukarya, H. salinarum	ΔserB
OE2294R	Conserved hypothetical protein	IAKpS94EVGGALR	no matching motif	44.51	136.96	2	590.808	0.0466	IAKS(1)EVGGALR	Pfam: DUF555: Family of uncharacterised, hypothetical archaeal proteins	Y2357_METMA	Archaea	H. salinarum, M. mazei	ΔserB
OE2359F	Conserved hypothetical protein	(M)SDDHDpS7TEPGLDAHR	no matching motif	36.35	132.55	3	577.892	-0.15136	SDDHDS(0.999)T(0.001)EPGLDAHR	Pfam: DUF35: Family of uncharacterised, conserved hypothetical archaeal and bacterial proteins	ACAC_PYRFU	Archaea	H. salinarum	ΔserB
OE2577R	Conserved hypothetical protein	VLEEETLIEPSpS61QGAITTDR	no matching motif	45.56	130.49	3	756.693	-0.050803	VLEEETLIEPS(0.001)S(0.999)QGAITTDR	By similarity: ATP binding, DNA replication	O29960_ARCFU ; Q8PW53_METMA ; Q978R8_THEVO	Archaea, in a few bacteria	H. salinarum	ΔserB
OE2676R	Conserved hypothetical protein	(M)pS2DTSTTDANSDSGADGDSESAVVLDFLAHGR	no matching motif	80.45	154.48	3	1059.78	-0.25334	S(0.94)DT(0.058)S(0.002)TTDANSDSGADGDSESAVVLDFLAHGR	Pfam: DUF655: Family of uncharacterised, hypothetical archaeal proteins	Q8PU19_METMA	Archaea	H. salinarum, M. mazei	ΔserB
		(M)p[S2DT4S2]TTDANSDSGADGDSESAVVLDFLAHGR	no matching motif	80.45	154.48	3	1059.78	-0.24986	S(0.932)DT(0.066)S(0.001)TTDANSDSGADGDSESAVVLDFLAHGR		-		H. salinarum	ΔserB
OE2847R	Conserved hypothetical protein	(M)pS2FEKGDTVVLHEK	no matching motif	22.53	62.56	3	523.583	-0.45869	S(0.999)FEKGDT(0.001)VVLHEK	-	-	H. salinarum	H. salinarum	ΔserB
OE3815R	Conserved hypothetical protein	(M)pS2GNPDDDRLEELRQR	no matching motif	16.58	59.89	3	627.281	1.045	S(1)GNPDDDRLEELRQR	Pfam: dsDNA_bind: This domain is believed to bind double-stranded DNA of 20 bases length	PDCD5_HUMAN	Archaea, eukarya	Archaea	WT, ΔserB
		(M)AcpS2GNPDDDRLEELRQR	no matching motif	33.92	104.52	2	961.922	0.098848	S(1)GNPDDDRLEELRQR		PDCD5_HUMAN		Archaea	ΔserB
OE4169F	Conserved hypothetical protein	VDVTPNpS456EHR	no matching motif	28.51	120.67	2	617.267	0.45909	VDVTPNS(1)EHR	Pfam: DUF557: This family is the archaeal-type phosphoenolpyruvate carboxylase	CAPPA_SULSO	Archaea	H. salinarum	ΔserB
OE4171R	Conserved hypothetical protein	ApY97ADTHPAR	no matching motif	25.83	33.85	2	541.227	-3.593	AY(0.971)ADT(0.029)HPAR	-	-	H. salinarum	H. salinarum	ΔserB
OE4671R	Conserved hypothetical protein	GGDIKVpS594R	no matching motif	29.27	88.27	2	456.221	0.41528	GGDIKVS(1)R	Pfam: KH_1: RNA binding / Pfam: PIN: The function is unknown but a role in signaling appears likely /ATP/GTP-binding site motif A (P-loop)	Q97BL5_THEVO	Archaea, bacteria	H. salinarum, T. volcanium	WT, ΔserB
		VSRGp[S597T598]IAEELER	S597: PKA; CK1; T598: CK2; CAMK2; PKD; CHK1	32.34	58.81	3	509.579	-0.39457	VS(0.075)RGS(0.463)T(0.463)IAEELER		-		S597: archaea; T598: H. salinarum	WT, ΔserB
OE3943R	Conserved hypothetical protein	pT13AGoxM16CTTYAAHLVAEELR	no matching motif	69.01	183.28	2	1045.46	-0.41744	T(0.98)AGMCT(0.01)T(0.01)YAAHLVAEELR	Pfam: tRNA_anti: OB-fold nucleic acid binding domain	O27047_METTH	Archaea	H. salinarum	WT, ΔserB
		TVVALDDTDSRTAGMCpT18TYAAHLVAEELR	no matching motif	61.39	121.92	3	1082.83	0.518	TVVALDDTDSRT(0.003)AGMCT(0.977)T(0.02)YAAHLVAEELR		-		Archaea	WT, ΔserB
		TAGMCTp[T19Y20]AAHLVAEELR	no matching motif	28.59	109.32	3	691.976	-0.1043	TAGMCT(0.333)T(0.333)Y(0.333)AAHLVAEELR		-		Archaea	WT, ΔserB
Translation
OE2165R/rps15	ribosomal protein S15	Gp[S11S12]GSDRPTADEPPEW	S11: PKA;CAMK2; S12: CAMK2; AKT	48.19	98.09	3	1009.41	-0.43332	GS(0.457)S(0.457)GS(0.085)DRPT(0.001)ADEPPEWSDVDEDAIEER	In Escherichia coli, this protein binds to 16S ribosomal RNA and functions at early steps in ribosome assembly	RPS13_HUMAN	Archaea, eukarya	S11: H. salinarum; S12: archaea, eukarya	ΔserB
		RGp[S11S12GS14DRPT18]ADEPPEW	S14: CK1; T18: PKA; CK2	26.96	43.8	3	1061.44	-0.34283	RGS(0.107)S(0.393)GS(0.393)DRPT(0.107)ADEPPEWSDVDEDAIEER		-		S14: archaea, eukarya; T18: H. salinarum	ΔserB
OE2629F/rps11	ribosomal protein S11	TPIPHDGpT119RPPKNSG	no matching motif	18.13	54.4	3	758.358	-0.024382	IEDVT(0.001)PIPHDGT(0.794)RPPKNS(0.153)GY(0.052)	Plays an essential role in selecting the correct tRNA in protein biosynthesis. It is located on the large lobe of the small ribosomal subunit	RPS14_HUMAN	All domains of life	Archaea, eukarya, in a few bacteria	WT, ΔserB
		IEDVGTRPPKNpS125GY	no matching motif	24.92	82.28	3	758.358	-0.22509	IEDVTPIPHDGT(0.035)RPPKNS(0.874)GY(0.091)		-		H. salinarum	WT, ΔserB
		IEDVGp[T119RPPKNS125GY127]	no matching motif	24.92	82.28	3	758.358	-0.22509	IEDVTPIPHDGT(0.035)RPPKNS(0.874)GY(0.091)		-		H. salinarum	WT, ΔserB
OE2633F/rpl13	ribosomal protein L13	ANLGpS65DRGPYYPK	no matching motif	26.15	97.94	2	759.343	0.16534	ANLGS(1)DRGPYYPK	Ribosomal protein L13 is one of the proteins from the large ribosomal subunit. In Escherichia coli, L13 is known to be one of the early assembly proteins of the 50S ribosomal subunit.	RL13A_HUMAN	All domains of life	Archaea	WT, ΔserB
OE3357R/rps8R	ribosomal protein S8.eR	SKpS25ELGREPTETTVGEPR	no matching motif	23.78	56.5	3	684.991	0.11169	S(0.216)KS(0.782)ELGREPT(0.001)ETTVGEPR	S8 is known to bind directly to 16S ribosomal RNA.	Q5JR94_HUMAN	Archaea, eukarya	H. salinarum	ΔserB
		p[S23KS25]ELGREPTETTVGEPR	CK1; CK2	15.97	37.38	3	684.991	0.048827	S(0.608)KS(0.388)ELGREPT(0.003)ET(0.001)T(0.001)VGEPR		-		H. salinarum	ΔserB
OE3388F/rpl3	ribosomal protein L3	KGpS11oxM12GFSPR	PKA; GSK3; CAMK2; AKT	34.58	59.23	2	531.726	0.20186	KGS(1)MGFSPR	The L3 protein is a component of the large subunit of cytoplasmic ribosomes/3' -UTR-mediated translational regulation	RL3_HUMAN	All domains of life	Archaea, eukarya	WT, ΔserB
		KGp[S11oxM12GFS15]PR	CK1; CDK2; CDK1	30.39	32.45	2	531.726	0.13439	KGS(0.961)MGFS(0.039)PR		-		Archaea	WT, ΔserB
OE3407F/rpl5	Ribosomal protein L5	(M)AcpS2ETDSTDFHEoxM12REPR	GSK3	20.11	68.46	2	655.811	0.25532	S(0.976)ET(0.024)DSTDFHEMREPR	Ribosomal protein L5 is one of the proteins from the large ribosomal subunit. In Escherichia coli, L5 is known to be involved in binding 5S RNA to the large ribosomal subunit.	RL11_HUMAN ; RL5_AQUAE	All domains of life	Archaea, bacteria	WT, ΔserB
		AKpS55PEPEFGLR	CK1	24.57	52.27	3	658.923	-0.2565	AKS(1)PEPEFGLR		-		H. salinarum	WT, ΔserB
		(M)Acp[S2ET4]DSTDFHEoxM12REPR	no matching motif	20.11	68.46	2	655.811	0.25532	S(0.976)ET(0.024)DSTDFHEMREPR		-		Archaea, bacteria	WT, ΔserB
OE3412F/rpl32R	ribosomal protein L32.eR	IEEHAEpS220QGIR	no matching motif	34.24	150.24	2	674.798	-0.12935	IEEHAES(1)QGIR	Translation	-	Archaea, eukarya	H. salinarum	ΔserB
OE4101R/trpS1	tryptophanyl-tRNA synthetase (EC 6.1.1.2)	oxM394p[S395S396S397EPAS401]HISLLDDPETGADK	S395: CK2; S397: GSK3	32.27	59.09	3	795.005	-0.20612	MS(0.087)S(0.454)S(0.454)EPAS(0.004)HISLLDDPETGADK	Catalyse the attachment of an amino acid to its cognate transfer RNA molecule	SYWC_HUMAN	All domains of life	S395: all domains; S396: archaea, bacteria; S397: all domains	ΔserB
OE4459R/rpl31R	ribosomal protein L31.eR	(M)Acp[S2AS4]EFDDRFVTVPLRDVTK	S2: CK2	31.54	99.18	3	768.702	0.40784	S(0.716)AS(0.284)EFDDRFVTVPLRDVTK	Translation	RL31_METTH	Archaea	-	WT
OE4626R/sui1	probable translation initiation factor SUI1	DVDLDSLSpS58DLK	CK1; GSK3	58.5	180.61	2	693.805	0.43799	DVDLDSLS(0.002)S(0.998)DLK	Translation initiation factor activity	SUI1_YEAST	All domains of life	Archaea, bacteria	WT
OE4721R/aef1a, tuf	translation elongation factor aEF-1 alpha subunit	oxM147DVVDYDEpS155KYNEVVSGVK	no matching motif	23.57	77.71	3	757.996	-0.23187	MDVVDY(0.109)DES(0.782)KY(0.109)NEVVSGVK	Translation elongation factor activity	EF1A_YEAST	All domains of life	S155: archaea, eukarya	ΔserB
		oxM147DVVDYDESKYNEVVpS162GVK	no matching motif	29.22	80.07	3	757.996	-0.66384	MDVVDY(0.012)DESKYNEVVS(0.987)GVK		EF1A_AERPE		S162: archaea	ΔserB
		oxM147DVVDp[Y152DES155KY157]NEVVSGVK	Y157: ALK; EGFR: EGFR	23.57	77.71	3	757.996	-0.23187	MDVVDY(0.109)DES(0.782)KY(0.109)NEVVSGVK		A6PW80_HUMAN		Y152: all domains; Y157: all domains	ΔserB
OE4729R/aef2, fus	translation elongation factor aEF-2	DAIAGSTVSNEEoxM378TPFEpS383IDHISEPVITK	CK1	30.77	75.01	3	1071.82	-0.57828	DAIAGSTVSNEEMT(0.001)PFES(0.989)IDHIS(0.009)EPVIT(0.002)K	Translation elongation factor activity	EFG_BACSU	All domains of life	S383: archaea, bacteria	ΔserB
		DAIAGSTVSNEEoxM378p[T379PFES383IDHIS388EPVIT393]K	no matching motif	30.77	75.01	3	1071.82	-0.57828	DAIAGSTVSNEEMT(0.001)PFES(0.989)IDHIS(0.009)EPVIT(0.002)K		EF2_SULSO		Archaea	ΔserB
		IDVPpS634EHoxM637GAASGEVQGR	no matching motif	40.36	101.13	3	645.947	-0.69153	IDVPS(1)EHMGAASGEVQGR		EFG_LEPIN		H. salinarum, bacteria	ΔserB
OE4736R/rps12	ribosomal protein S12	KpS36DPLEGAPQGR	no matching motif	38.17	93.54	2	667.809	0.013422	KS(1)DPLEGAPQGR	Translation initiation	RS23_YEAST	All domains of life	All domains of life	ΔserB
Central intermediary metabolism
OE1495R/pykA	pyruvate kinase (EC 2.7.1.40)	IGAIVp[S530ADAGLT536]GYPAVIAR	no matching motif	35.39	91.41	3	665.682	-0.08104	IGAIVS(0.026)ADAGLT(0.974)GYPAVIAR	Embden-Meyerhof pathway and gluconeogenesis / Pyruvate metabolism/ Purine metabolism	Q979W1_THEVO	All domains of life	Archaea	ΔserB
		IGAIVSADAGLpT536GYPAVIAR	no matching motif	35.39	91.41	3	665.682	-0.08104	IGAIVS(0.026)ADAGLT(0.974)GYPAVIAR		CISY2_BACSU		Archaea, bacteria	ΔserB
OE1500R/ppsA	pyruvate, water dikinase (EC 2.7.9.2)	RAAGIVp[T386DEGGoxM391T392S393]HAAIVSR	no matching motif	19.25	34.77	3	732.347	0.077654	RAAGIVT(0.333)DEGGMT(0.333)S(0.333)HAAIVS(0.001)R	Embden-Meyerhof pathway and gluconeogenesis / Pyruvate metabolism	PPSA_ECOLI ; Q97ZL2_SULSO	Archaea, bacteria	Archaea, bacteria	WT, ΔserB
		RAAGIVTDEGGMpT392SHAAIVSR	no matching motif	83.12	178.04	3	727.016	-0.08049	RAAGIVTDEGGMT(1)SHAAIVSR		PPSA_ECOLI ; YOBB_BACSU		Archaea, bacteria	ΔserB
		AAGIVTDEGGoxM391TpS393HAAIVSR	no matching motif	32.27	100.53	3	727.016	-1.0162	AAGIVTDEGGMT(0.002)S(0.998)HAAIVSR		Q83BF9_COXBU		Archaea, bacteria	WT, ΔserB
		RAAGIVTDEGGMTSHAAIVpS399R	no matching motif	23.87	62.18	3	727.016	-0.18181	RAAGIVTDEGGMT(0.029)S(0.147)HAAIVS(0.824)R		YOBB_BACSU		Archaea, bacteria	WT, ΔserB
OE2623R/porA	pyruvate--ferredoxin oxidoreductase (EC 1.2.7.1) alpha subunit	NPpS84EEAVYGDEEVKPLTENLDDLR	CAMK2	43.95	155.04	3	938.09	-0.30905	NPS(1)EEAVYGDEEVKPLTENLDDLR	Pyruvate metabolism	-	Archaea, bacteria	H. salinarum	ΔserB
OE2866R/sdhB	succinate dehydrogenase (EC 1.3.99.1) subunit B (iron-sulfur protein)	(M)pS2TKPSQSETETETDTEPATTGHQQR	GSK3	41.59	126.88	3	956.744	-0.20064	S(0.941)T(0.057)KPS(0.002)QSETETETDTEPATTGHQQR	Tricarboxylic acid and glyoxylate cycle/ Oxidative phosphorylation	-	All domains of life	H. salinarum	WT, ΔserB
		(M)p[S2T3KPS6QS8ET10]ETETDTEPATTGHQQR	S6: CK1; CK2; S8, T10: CK2	39.2	131.4	3	956.744	-0.27073	S(0.023)T(0.01)KPS(0.065)QS(0.451)ET(0.451)ET(0.001)ETDTEPATTGHQQR		DHSB_DROME ; Q73H47_WOLPM		T3: H. salinarum, bacteria; S6: H. salinarum; S8: H. salinarum, bacteria; T10: H. salinarum	ΔserB
OE3634F/icd	isocitrate dehydrogenase (NADP+) (EC 1.1.1.42)	(M)pS2YDKIEVPEGGAK	no matching motif	64.41	127.93	2	736.837	-0.049497	S(1)YDKIEVPEGGAK	Tricarboxylic acid and glyoxylate cycle	IDH3A_BOVIN ; Q8U488_PYRFU ; Q7WCL1_BORBR	All domains of life	All domains of life	ΔserB
OE3653R/gpm	phosphoglycerate mutase (EC 5.4.2.1), 2,3-biphosphateglycerate-independent type	DVGLPDGQoxMGNpS59EVGHLTIGAGR	no matching motif	30.14	88.71	3	787.362	-0.44769	DVGLPDGQMGNS(1)EVGHLTIGAGR	Embden-Meyerhof pathway and gluconeogenesis	gi1790041_ECOLI ; O32247_BACSU ; GPMI_METMA	Archaea, bacteria	Archaea, bacteria	ΔserB
Nucleotide metabolism
OE1951F/purK	phosphoribosylaminoimidazole carboxylase (EC 4.1.1.21) carbon dioxide-fixation subunit	DAVSFTDpT381HHS	no matching motif	28.08	100.32	2	648.748	-0.060625	DAVSFT(0.064)DT(0.83)HHS(0.106)	Purine metabolism / De novo synthesis of purines	Q8CJX8_STRCO	All domains of life	H. salinarum, bacteria	ΔserB
		DAVSFp[T379DT381HHS384]	no matching motif	28.08	100.32	2	648.748	-0.060625	DAVSFT(0.064)DT(0.83)HHS(0.106)		Q8CJX8_STRCO ; PURK_SULSO		T379: Archaea, bacteria; S384: H. salinarum, bacteria	ΔserB
OE2458R/guaB	IMP dehydrogenase (EC 1.1.1.205)	(M)ANDpS5STDGRFSEK	no matching motif	17.31	50.86	2	747.299	0.4681	ANDS(0.838)S(0.025)T(0.136)DGRFSEK	Purine metabolism	IMDH_STRP1 ; A4V488_DROME ; Q9YBU2_AERPE	All domains of life	All domains of life	ΔserB
		(M)ANDp[S5S6T7]DGRFSEK	no matching motif	17.31	50.86	2	747.299	0.4681	ANDS(0.838)S(0.025)T(0.136)DGRFSEK		S6: Q138J0 _RHOPS ; IMDH2_HUMAN ; T7: IMDH_MYCTU ; IMDH1_MOUSE		All domains of life	ΔserB
OE2667F/ndk	nucleoside-diphosphate kinase (EC 2.7.4.6)	GDYGNDLGHNLIHGpS121DHEDEGANER	CK2	16.45	38.66	4	701.035	0.58066	GDY(0.004)GNDLGHNLIHGS(0.996)DHEDEGANER	Purine metabolism/Pyrimidine metabolism	NDK_ECOLI (pS121) ; CHER_BACSU; NDK3_HUMAN ; NDK_SULSO	All domains of life	All domains of life	ΔserB
OE5201F/pyrB	aspartate carbamoyltransferase (EC 2.1.3.2) catalytic subunit	RLGGDIVDMGSVDp[S77S78S79]VK	S77, S78: CK1	49.1	100.53	2	959.435	0.59124	RLGGDIVDMGS(0.001)VDS(0.055)S(0.472)S(0.472)VK	Pyrimidine metabolism / De novo synthesis of pyrimidines	S77: CARA_BACSU ; PYRB_SULSO ; S78: A7ZVC7_ECO24 ; PYR1_HUMAN ; PYRB_METJA ; S79: CARA_BACSU ; PYR1_HUMAN ; PYRB_SULSO	All domains of life	S77: archaea, bacteria; S78: all domains; S79: all domains	ΔserB
		DVVYDLEQEpS201GTRVR	no matching motif	17.06	44.42	2	923.423	-0.053161	DVVY(0.001)DLEQES(0.834)GT(0.165)RVR		OTCC_HAEIN		H. salinarum, bacteria	ΔserB
		DVVYDLEQEp[S201GT203]RVR	no matching motif	17.06	44.42	2	923.423	-0.053161	DVVY(0.001)DLEQES(0.834)GT(0.165)RVR		CARA_BACSU ; PYR1_HUMAN;		H. salinarum, bacteria, eukarya	ΔserB
OE5202F/pyrI	aspartate carbamoyltransferase (EC 2.1.3.2) regulatory chain	(M)pS2SDQHLQVSK	no matching motif	28.96	130.93	2	604.769	-0.071042	S(0.914)S(0.086)DQHLQVSK	Pyrimidine metabolism / De novo synthesis of pyrimidines	PYRI_VIBCH	Archaea, bacteria	A few archaea and bacteria	WT, ΔserB
		(M)Acp[S2S3]DQHLQVSK	no matching motif	25.14	69.56	2	625.774	-0.17639	S(0.788)S(0.212)DQHLQVSK		-		S3: H. salinarum	WT, ΔserB
Amino acid metabolism
OE1684F/cysD	sulfate adenylyltransferase (EC 2.7.7.4) small subunit	NEDVGDYVTANDLEPGDDIPIpS132ELDDQNQHHVR	no matching motif	29.06	77.06	4	950.664	-0.018352	NEDVGDYVTANDLEPGDDIPIS(1)ELDDQNQHHVR	Purine metabolism	Q8P610_XANCP	Archaea, bacteria	H. salinarum, bacteria	ΔserB
OE3691F/trpD2	probable anthranilate phosphoribosyltransferase (EC 2.4.2.18)	RLNTEVVApS20GPK	GSK3	29.3	46.26	2	675.842	0.54555	RLNTEVVAS(1)GPK	Phenylalanine, tyrosine and tryptophan biosynthesis	TRPG_THEMA ; TRPD_AERPE	Archaea, bacteria	Archaea, bacteria	ΔserB
OE3922R/glnA	glutamate-ammonia ligase (EC 6.3.1.2)	DLApS175DIRR	no matching motif	25.92	76.32	2	513.242	0.27318	DLAS(1)DIRR	Glutamate metabolism	Q8RBJ5_THETN ; Q977Z8_THEVO	All domains of life	Archaea, bacteria	ΔserB
OE3959R/ilvE2	branched-chain-amino-acid aminotransferase (EC 2.6.1.42)	HApS154SQIPTNAK	no matching motif	61.69	150.24	2	617.285	0.090758	HAS(0.955)S(0.045)QIPTNAK	Biosynthesis of branched chain amino acids (valine, leucine, isoleucine) / Coenzyme A biosynthesis / Amino acids degradation	Q9VYD5_DROME	All domains of life	A few euckarya and bacteria	WT, ΔserB
		HASpS155QIPTNAK	no matching motif	26.36	89.16	2	617.285	0.63039	HAS(0.08)S(0.919)QIPT(0.001)NAK		Q8R6F4_FUSNN		A few bacteria	WT, ΔserB
Chaperones
OE1737R/dnaK	dnaK-type molecular chaperone hsp70	NQAVQNPDQTIApS69IKR	no matching motif	39.13	112.97	3	621.642	-0.61367	NQAVQNPDQT(0.019)IAS(0.981)IKR	Protein folding	YQEV_BACSU ; DNAK_METMA	All domains of life	Archaea, bacteria	ΔserB
		ETTVNLPFVTATDpS264GPVHLEQDITR	CK1	45.05	71.27	3	940.787	-0.38444	ETTVNLPFVT(0.001)AT(0.035)DS(0.958)GPVHLEQDIT(0.006)R		DNAK_COXBU ; GRP75_HUMAN(pS200) ; DNAK_THEVO		All domains of life	ΔserB
		NQAVQNPDQp[T66IAS69]IKR	PLK1	39.13	112.97	3	621.642	-0.61367	NQAVQNPDQT(0.019)IAS(0.981)IKR		Q1RGI8_ECOUT ; YQEV_BACSU ; DNAK_METTH		T66: All domains of life	ΔserB
		ETTVNLPFVTAp[T262DS264GPVHLEQDIT274]R	no matching motif	45.05	71.27	3	940.787	-0.38444	ETTVNLPFVT(0.001)AT(0.035)DS(0.958)GPVHLEQDIT(0.006)R		T262: DNAK_CHLTE(pT196) ; DNAK_THEVO ; T274: Q1RGI8_ECOUT ; YQEV_BACSU ; GRP75_HUMAN(pS200) ; DNAK_METTH		T262: Archaea, bacteria; T274: all domains	ΔserB
OE1742R/grpE	dnaJ/dnaK ATPase stimulator grpE	pS2DHAEHAADAADTDAPEGDDAGGDDGEQAGDDGTSALSERVR	no matching motif	76.48	84.16	4	1059.17	-0.45852	S(1)DHAEHAADAADTDAPEGDDAGGDDGEQAGDDGTSALSERVR	Protein folding	GRPE_HAEIN	All domains of life	H. salinarum, bacteria	WT
OE3925R/ths2, thsB, cctB	thermosome subunit 2	DAQEHNIpS33AAR	no matching motif	23.99	89.16	2	646.275	0.78854	DAQEHNIS(1)AAR	Protein degradation	CH60_COXBU ; Q8JHI7_DANRE	All domains of life	H. salinarum, bacteria, eukarya	ΔserB
		AVADAVRpS44TLGPK	no matching motif	48.58	120.05	2	682.85	0.036837	AVADAVRS(0.999)T(0.001)LGPK		CH60_WOLPM ; TCPA_DROME ; THSB_SULSO		All domains of life	WT
		LRDFADpS430VSGR	no matching motif	32.64	29.67	3	434.866	0.7811	LRDFADS(0.937)VS(0.063)GR		CH60_CLOTE ; TCPA_DROME ; THSB_METTH		All domains of life	ΔserB
		LRDFADSVpS432GR	CK2	23.87	78.54	2	651.796	0.24559	LRDFADS(0.011)VS(0.989)GR		CH60_WOLPM ; THSB_METTH		Archaea, bacteria	ΔserB
OE4122R/ths1, thsA, cctA	thermosome subunit 1	SQHDGGDTEAGLDAYNGDVIDMEpS488EGIVEPLR	no matching motif	54.62	126.88	3	1162.49	-0.028182	SQHDGGDTEAGLDAYNGDVIDMES(1)EGIVEPLR	Protein degradation	CH60_BRUME ; TCPG_YEAST ; THSB_AERPE	All domains of life	All domains of life	WT
General enzymatic function
OE2097F	upsA domain protein	KFApS74DIGR	no matching motif	33.05	54.6	2	487.229	0.32311	KFAS(1)DIGR	Stress response	-	H. salinarum	H. salinarum	ΔserB
OE3168R	pyridoxal phosphate-dependent aminotransferase (homolog to acetylornithine aminotransferase)	HAGTpS450KVEGEPTA	CK2	31.81	120.05	2	682.298	0.48678	HAGT(0.069)S(0.931)KVEGEPTA	Aminotransferase	Q8CJL2_STRCO	All domains of life	H. salinarum, bacteria	ΔserB
		HAGp[T449S450]KVEGEPTA	no matching motif	31.81	120.05	2	682.298	0.48678	HAGT(0.069)S(0.931)KVEGEPTA		Q81ZE4_BACAN		H. salinarum, bacteria	ΔserB
OE3542R	glutamine-rich alkaline protein	LDVALGpS232AQSR	no matching motif	49.93	164.06	2	598.787	-0.24488	LDVALGS(1)AQSR	-	Q99XV2_STRP1 ; IPI00712868_BOSBOVIS	H. salinarum, bacteria, eukarya	H. salinarum, bacteria, eukarya	ΔserB
		LDVALGSAQpS235R	CK1	41.69	164.06	2	598.787	-0.6263	LDVALGSAQS(1)R		Q9KMZ5_VIBCH ; CYC8_YEAST(pS710/741/780/805/815/817/943) ; PCLO_MOUSE(multiphosphorylated)		H. salinarum, bacteria, eukarya	ΔserB
		HQPQLMGpS244ADSQPIR	NEK6	40.27	106.79	2	880.893	-0.042041	HQPQLMGS(0.999)ADS(0.001)QPIR		Q9KMZ5_VIBCH ; CYC8_YEAST(pS710/741/780/805/815/817/943) ; ADHX_RAT		H. salinarum, bacteria, eukarya	ΔserB
		HQPQLMGSADpS247QPIR	CK1	29.6	117.38	2	872.895	-0.12291	HQPQLMGS(0.008)ADS(0.992)QPIR		Q7MX79_PORGI ; MED15_HUMAN		H. salinarum, bacteria, eukarya	ΔserB
		HQPQLMGp[S244ADS247QPIRS252ES254]VADAPQPVSQPESATTEIQ	S254: CAMK2	26.72	30.41	3	1332.95	0.016582	HQPQLMGS(0.112)ADS(0.293)QPIRS(0.293)ES(0.293)VADAPQPVS(0.002)QPES(0.002)AT(0.002)T(0.002)EIQ		S252: A9CII4_AGRT5 ; Q9VV52_DROME ; S254: FTSK_SALTY ; MED15_HUMAN		H. salinarum, bacteria, eukarya	WT
OE3710R/trkA6	trkA domain protein	HDApS183LALPLPSETLETGDR	PLK1	37.85	80.07	3	701.332	-0.12106	HDAS(0.855)LALPLPS(0.144)ET(0.001)LETGDR	-	Q8YHD2_BRUME	Archaea, bacteria	H. salinarum, bacteria	ΔserB
		HDASLALPLPpS190ETLETGDR	no matching motif	37.52	95.97	3	701.332	-0.10652	HDASLALPLPS(0.998)ET(0.002)LETGDR		YBJL_ECO57 ; Q9Y929_AERPE		Archaea, bacteria	ΔserB
		HDASLALPLPp[S190ET192LET195]GDR	no matching motif	37.52	95.97	3	701.332	0.32043	HDASLALPLPS(0.865)ET(0.121)LET(0.014)GDR		Q8P8Q2_XANCP		H. salinarum, bacteria	ΔserB
Carbohydrate metabolism
OE2318R/pmm3, pmu2	phosphohexomutase (phosphoglucomutase (EC 5.4.2.2), phosphomannomutase (EC 5.4.2.8))	GIQVTApS102HNPPSDNGIK	no matching motif	73.63	208.55	2	907.925	0.077446	GIQVTAS(1)HNPPSDNGIK	Embden-Meyerhof pathway and gluconeogenesis /Pentose phosphate pathway / Fructose and mannose metabolism	PGM_ECOLI(pS146) ; GLMM_BACSU(pS100) ; PGM_DROME(pS116) ; Q980S1_SULSO	All domains of life	All domains of life	WT, ΔserB
		RGIQVp[T100AS102HNPPS107]DNGIK	no matching motif	20.32	28.83	4	493.492	-0.31924	RGIQVT(0.481)AS(0.481)HNPPS(0.039)DNGIK		T100: Q8KFR2_CHLTE ; PGM_DROME(pS116) ; Q9Y952_AERPE ; T107: GLMM_NEIMA(pS104)		T100: All domains of life; T107: H. salinarum, bacteria	WT, ΔserB
				18.38	34.99	4	493.492	-0.33346	RGIQVT(0.167)AS(0.689)HNPPS(0.144)DNGIK
OE4094F/pmm1, pmu1	phosphohexomutase (phosphoglucomutase (EC 5.4.2.2), phosphomannomutase (EC 5.4.2.8))	AGVPAVMVpT92ASHNPSQYNGVK	no matching motif	29.57	85.5	3	741.68	-0.0018874	AGVPAVMVT(0.979)AS(0.021)HNPSQYNGVK	Embden-Meyerhof pathway and gluconeogenesis /Pentose phosphate pathway / Fructose and mannose metabolism	Q8KFR2_CHLTE ; PGM1_HUMAN(pS117/pT115/pY353) ; Q980S1_SULSO	All domains of life	All domains of life	WT, ΔserB
		AGVPAVMVTApS94HNPSQYNGVK	GSK3	80.25	198.61	3	741.68	-0.18251	AGVPAVMVTAS(1)HNPSQYNGVK		PGM_ECOLI(pS146) ; GLMM_BACSU(pS100) ; PGM1_HUMAN(pS117/pT115/pY353) ; Q980S1_SULSO		All domains of life	WT, ΔserB
		AGVPAVMVp[T92AS94HNPS98QY100]NGVK	S98: CK1; Y100: ALK; EGFR	17.72	23.32	3	741.68	-0.14301	AGVPAVMVT(0.645)AS(0.224)HNPS(0.042)QY(0.089)NGVK		S98: Q73H74_WOLPM ; Y100: ALGC_PSEAE(pS108) ; PGM_DROME(pS116) ; Q980S1_SULSO		S98: H. salinarum, bacteria; Y100: all domains	WT, ΔserB
OE4190F/pmm2	phosphohexomutase (phosphoglucomutase (EC 5.4.2.2), phosphomannomutase (EC 5.4.2.8))	DLAGAVVIpT101ASHNPPEYNGVK	no matching motif	47.39	103.48	3	744.695	0.38188	DLAGAVVIT(0.998)AS(0.002)HNPPEYNGVK	Embden-Meyerhof pathway and gluconeogenesis /Pentose phosphate pathway / Fructose and mannose metabolism	PGM_ECOLI(pS146) ; PGCA_BACSU(pS146) ; PGM1_HUMAN(pS117/pT115/pY353) ; Q980S1_SULSO	All domains of life	All domains of life	WT, ΔserB
		DLAGAVVITApS103HNPPEYNGVK	no matching motif	54.83	187.08	3	744.695	-0.069943	DLAGAVVIT(0.001)AS(0.999)HNPPEYNGVK		PGM_ECOLI(pS146) ; PGCA_BACSU(pS146) ; PGM1_HUMAN(pS117/pT115/pY353) ; Q980S1_SULSO		All domains of life	WT, ΔserB
		DLAGAVVIp[T101AS103HNPPEY109]NGVK	ALK; EGFR	24.82	68.89	3	744.695	0.55265	DLAGAVVIT(0.852)AS(0.143)HNPPEY(0.005)NGVK		PGCA_BACSU(pS146) ; Q980S1_SULSO		Archaea, bacteria	WT, ΔserB
Cellular processes
OE2296F/psmB	proteasome (EC 3.4.25.1) beta subunit	DTApS217GNGIHITK	no matching motif	35.74	93.54	2	647.295	-0.41174	DT(0.082)AS(0.918)GNGIHITK	Protein degradation	PSB8_HUMAN ; Q97AZ7_THEVO	Archaea, eukarya (a few bacteria)	Archaea, eukarya	ΔserB
		p[S209AS211ERDT215]ASGNGIHITK	S209: CK2; T215: PKA	25.21	46.78	3	608.614	0.30126	S(0.622)AS(0.355)ERDT(0.022)AS(0.001)GNGIHITK		S209: Q7KTG1_DROME		S209: Archaea, eukarya; S211: H. salinarum; T215: Archaea	ΔserB
OE3807R/pepF	oligoendopeptidase	(M)pS2SVPDRADVADEYK	no matching motif	40.71	108.77	2	816.351	-0.14607	S(0.814)S(0.186)VPDRADVADEYK	-	-	Archaea, bacteria	H. salinarum, bacteria	ΔserB
		(M)p[S2S3]VPDRADVADEYK	no matching motif	40.71	108.77	2	816.351	-0.14607	S(0.814)S(0.186)VPDRADVADEYK		-		S3: Archaea, bacteria	ΔserB
OE4673F/cxp	probable carboxypeptidase (EC 3.4.17.-)	VPSDLIADLp[S109EKT112S113]EAHPK	S109: GSK3; T112, S113: CK1	17.72	77.71	3	706.344	0.015903	VPSDLIADLS(0.366)EKT(0.366)S(0.267)EAHPK	Cofactor, nucleotide, and lipid metabolism	-	Archaea, bacteria	Archaea, bacteria	ΔserB
Small molecule transport
OE4301R	ABC-type transport system ATP-binding protein (probable substrate dipeptide/oligopeptide/nickel)	(M)AcpS2QQSIQSTADADQHSQPLVEVTDLKK	no matching motif	90.03	184.7	3	992.471	-0.46636	S(1)QQSIQSTADADQHSQPLVEVTDLKK	Transport	-	All domains of life	H. salinarum, bacteria	WT, ΔserB
OE4305R/dppA1	ABC-type transport system periplasmic substrate-binding protein (probable substrate dipeptide/oligopeptide/nickel)	LVpS212NPGQSEDAIQTRK	CAMK2	29.15	85.5	3	608.295	-0.49719	LVS(1)NPGQSEDAIQTRK	Transport	-	Archaea, bacteria	Archaea	WT
		LVSNPGQp[S217EDAIQT223]RK	no matching motif	23.56	75.78	3	608.295	-0.32923	LVSNPGQS(0.265)EDAIQT(0.735)RK		-		S217: H. salinarum; T223: archaea;	WT
		YDPp[S532LHS535S536]GETLPGGRK	S532: GSK3; PLK1; S535: CK1; CK2; S536: CK1; NEK6	21	68.52	3	627.623	0.021414	YDPS(0.066)LHS(0.466)S(0.466)GET(0.002)LPGGRK		-		S532: Archaea, bacteria; S535: archaea; S536: H. salinarum,bacteria	WT
OE4551F/dppA2	ABC-type transport system periplasmic substrate-binding protein (probable substrate dipeptide/oligopeptide/nickel)	VSpS279ADSASVRQK	PKD; CHK1	45.32	93.54	2	657.806	0.15923	VS(0.009)S(0.99)ADS(0.001)ASVRQK	Transport	-	Archaea, bacteria	Archaea, bacteria	WT
		VSSADp[S282AS284]VRQK	S282: CK1	35.83	83.05	2	657.806	0.38152	VSSADS(0.5)AS(0.5)VRQK		-		S282: H. salinarum,bacteria; S284: archaea, bacteria	WT
Μiscellaneous
OE3949R/grx1	probable glutaredoxin	LDELGLDYVEHEVPSSHpS38DR	CK1	28.08	90.21	3	793.016	0.10641	LDELGLDYVEHEVPS(0.122)S(0.122)HS(0.756)DR	-	-	H. salinarm, bacteria	H. salinarum	ΔserB
		LDELGLDYVEHEVPp[S35S36HS38]DR	no matching motif	28.08	90.21	3	793.016	0.10641	LDELGLDYVEHEVPS(0.122)S(0.122)HS(0.756)DR		-		H. salinarum	ΔserB
OE4230F/yuxL	probable acylaminoacyl-peptidase (EC 3.4.19.1)	pS633GDPGHVVDR	NEK6	43.76	117.35	2	559.735	0.21117	S(1)GDPGHVVDR	-	-	All domains of life	Archaea, bacteria	ΔserB
OE4509F	nonhistone chromosomal protein	RLDDVGESEpS47EADRNR	no matching motif	56.25	112.97	3	643.276	-0.093409	RLDDVGES(0.013)ES(0.987)EADRNR	archaeal chromosomal protein MC1 which protect DNA against thermal denaturation	-	A few archaea	A few archaea	WT, ΔserB
		RLDDVGEp[S45ES47]EADRNR	CK2	17.87	53.75	3	643.276	-0.68662	RLDDVGES(0.5)ES(0.5)EADRNR		-		H. salinarum	WT, ΔserB
Energy metabolism
OE3988R/atpE	A-type ATP synthase (EC 3.6.3.14) subunit E	(M)p[S2LET5]VVEDIRDEAR	T5: CK1; CK2	39.09	77.65	2	856.399	0.58402	S(0.752)LET(0.248)VVEDIRDEAR	Oxidative phosphorylation	-	All domains of life	S2: Archaea, bacteria; T5: H. salinarum (a few bacteria)	WT
OE3992R/atpH	A-type ATP synthase (EC 3.6.3.14) subunit H	SAEpS15DADDIVAEAEEDREQR	CK1	49.8	89.03	3	772.315	-0.3212	S(0.056)AES(0.944)DADDIVAEAEEDREQR	Oxidative phosphorylation	-	Archaea (in a few bacteria and eukarya)	H. salinarum	WT, ΔserB
		EQIDpS67ERDAVLADGESDR	no matching motif	30.32	41.67	3	695.63	-0.30444	EQIDS(0.999)ERDAVLADGES(0.001)DR		-		H. salinarum, bacteria	ΔserB
		p[S12AES15]DADDIVAEAEEDREQR	no matching motif	29.54	48.71	3	772.315	0.35588	S(0.624)AES(0.376)DADDIVAEAEEDREQR				S2: H. salinarm, bacteria, eukarya	WT, ΔserB
Coenzyme metabolism
OE1385F/thiN	thiamine biosynthesis protein thiN	GLTQHEVAELLGVSQpS43AVSK	no matching motif	49.31	54.4	3	711.691	0.3859	GLTQHEVAELLGVS(0.016)QS(0.931)AVS(0.052)K	Cofactor, nucleotide, and lipid metabolism / Thiamin biosynthesis		Archaea (in a few bacteria)	H. salinarum	ΔserB
		GLTQHEVAELLGVp[S41QS43AVS46]K	S41: NEK6; S46: CK1	49.31	54.4	3	711.691	0.3859	GLTQHEVAELLGVS(0.016)QS(0.931)AVS(0.052)K				S41, S46: Archaea	ΔserB
OE3214F/cbiH1, cobJ1	precorrin-3B C17-methyltransferase (EC 2.1.1.131) 1	VRDGEDVAHVpS98GGDPNVYGK	no matching motif	35.19	68.27	3	717.655	-0.26158	VRDGEDVAHVS(0.997)GGDPNVY(0.003)GK	Cobamide synthesis		Archaea, bacteria	Archaea, bacteria	ΔserB
OE3495R/cad	probable 4a-hydroxytetrahydrobiopterin dehydratase (EC 4.2.1.96)	FTDHEAGGVTpS78QDIELAR	no matching motif	17.38	47.86	3	675.969	0.11068	FT(0.153)DHEAGGVT(0.04)S(0.807)QDIELAR	Pfam: Pterin_4a: Pterin 4 alpha carbinolamine dehydratase is also known as DCoH (dimerisation cofactor of hepatocyte nuclear factor 1-alpha)	PHS_DROME ; PHS2_HUMAN	All domains of life	H. salinarum (in a few eukarya)	ΔserB
		Fp[T69DHEAGGVT77S78]QDIELAR	T69: PKA; CK2	17.38	47.86	3	675.969	0.11068	FT(0.153)DHEAGGVT(0.04)S(0.807)QDIELAR				T69: all domains; T77: all domains	ΔserB
Gene regulation
OE1797R/sirR	transcription regulator sirR	EHEPPIAp[T26S27T28IAEY32]LDVTPPTVTSMAEK	T28: CK2; Y32: ALK; EGFR	27.11	70.68	3	1041.82	0.085705	EHEPPIAT(0.197)S(0.365)T(0.365)IAEY(0.072)LDVTPPTVTSMAEK	Transcription regulation		Archaea, bacteria	T26, S27: Archaea, bacteria; T28: H. salinarum, bacteria; Y32: H. salinarum, bacteria;	ΔserB
Signal transduction
OE5243F/car, htr11, htrXI	transducer protein car	AQDRApT245EGEQTAETAIDR	PKA; CK2	19.37	40.81	3	681.299	-0.36124	AQDRAT(0.98)EGEQT(0.015)AET(0.005)AIDR	Chemotaxis		All domains of life	H. salinarum, bacteria	ΔserB
		AQDRAp[T245EGEQT250]AETAIDR	no matching motif	19.37	40.81	3	681.299	-0.36124	AQDRAT(0.98)EGEQT(0.015)AET(0.005)AIDR				T28: All domains of life	ΔserB
Hypothetical protein
OE4600F	hypothetical protein	MVGGLLYpT51R	NEK6	21.83	49.59	2	545.262	0.68726	MVGGLLY(0.026)T(0.974)R	-		H. salinarum	H. salinarum	ΔserB
		MVGGLLp[Y50T51]R	no matching motif	21.83	49.59	2	545.262	0.68726	MVGGLLY(0.026)T(0.974)R				H. salinarum	ΔserB
