# Supplementary material for: Ser/Thr/Tyr Protein Phosphorylation in the Archaeon Halobacterium salinarum—A Representative of the Third Domain of Life
Source: PLoS One. 2009 Mar 10;4(3):e4777. doi: 10.1371/journal.pone.0004777 (PMC2652253; doi:10.1371/journal.pone.0004777)
Supplement: Table S2 — Phosphoproteome conservation of H.salinarium. On the basis of two-directional BLASTP alignments, we defined orthologous proteins that are phosphorylated in H.salinarium as well as in E.coli or B.subtilis. Phosphorylation sites of conserved phosphoproteins are illustrated in brackets. Conserved Phosphosites are marked in bold. (0.02 MB XLS) [file pone.0004777.s003.xls]

## Sheet: Table1
Accession	Description	Ortholog (E.coli)	Ortholog (B.subtilis)
OE1495R (T536)	pyruvate kinase	gi1787965 (S36)	Bsu2914 (S36)
OE4729R (S383, S634)	translation elongation factor aEF-2	gi1789738 (S636, S692)	Bsu0112 ([T24|T25], [T43|S48], S213, S302, S569, S680)
OE3653R (S59)	phosphoglycerate mutase	gi1790041 (S64)	Bsu3388 (S62)
OE4094F (T92, S94)	probable phosphomannomutase	gi1789566 (S102)	Bsu0177 (S100)
OE2667F (S121)	nucleoside-diphosphate kinase	gi1788866 (T93)	Bsu2272 (T92, [S118|S120], S123)
OE1500R (T392, S393, S399)	pyruvate, water dikinas	gi1787994 (T419)	-
OE1737R (S69, S264)	dnaK-type molecular chaperone hsp70	gi1786196 (S453)	-
OE3634F (S2)	isocitrate dehydrogenase (NADP+)	gi1787381 (S113)	-
OE4190F (T101, S103)	probable phosphohexomutase	gi1786904 (S146)	-
OE5201F ([S77|S78|S79], S201)	aspartate carbamoyltransferase	-	Bsu1551 (S303)
